# Supplementary material for: Highly dispersed Pt atoms and clusters on hydroxylated indium tin oxide: a view from first-principles calculations
Source: Royal Society of Chemistry journal article supplement (doi:10.1039/d1ta03177e), 2021-01-01
Supplement: d1ta03177e1.pdf [file d1ta03177e1.pdf]

**Indium Oxide Bulk:**

In O

```
1.0000000000000000
  10.3521190244000003  0.0000000000000000  0.0000000000000000
  0.0000000000000000  10.3521190244000003  0.0000000000000000
  0.0000000000000000  0.0000000000000000  10.3521190244000003
```

32 48

Cartesian

```
0.0000000000000000  2.5880297561000001  4.8129736071776117
0.0000000000000000  7.7640895063987383  5.5391454172223886
5.1760595122000002  7.7640895063987383  9.9890331193776216
5.1760595122000002  2.5880297561000001  0.3630857290363620
0.0000000000000000  7.7640895063987383  0.3630857290363620
0.0000000000000000  2.5880297561000001  9.9890331193776216
5.1760595122000002  2.5880297561000001  5.5391454172223886
5.1760595122000002  7.7640895063987383  4.8129736071776117
4.8129736071776117 -0.0000000000000000  2.5880297561000001
5.5391454172223886 -0.0000000000000000  7.7640895063987383
9.9890331193776216  5.1760595122000002  7.7640895063987383
0.3630857290363620  5.1760595122000002  2.5880297561000001
0.3630857290363620  0.0000000000000000  7.7640895063987383
9.9890331193776216  0.0000000000000000  2.5880297561000001
5.5391454172223886  5.1760595122000002  2.5880297561000001
4.8129736071776117  5.1760595122000002  7.7640895063987383
2.5880297561000001  4.8129736071776117 -0.0000000000000000
7.7640895063987383  5.5391454172223886  0.0000000000000000
7.7640895063987383  9.9890331193776216  5.1760595122000002
2.5880297561000001  0.3630857290363620  5.1760595122000002
7.7640895063987383  0.3630857290363620  0.0000000000000000
2.5880297561000001  9.9890331193776216 -0.0000000000000000
2.5880297561000001  5.5391454172223886  5.1760595122000002
7.7640895063987383  4.8129736071776117  5.1760595122000002
2.5880297561000001  2.5880297561000001  2.5880297561000001
7.7640895063987383  7.7640895063987383  7.7640895063987383
2.5880297561000001  7.7640895063987383  7.7640895063987383
7.7640895063987383  2.5880297561000001  2.5880297561000001
7.7640895063987383  7.7640895063987383  2.5880297561000001
2.5880297561000001  2.5880297561000001  7.7640895063987383
7.7640895063987383  2.5880297561000001  7.7640895063987383
2.5880297561000001  7.7640895063987383  2.5880297561000001
1.1434526873133086  1.5995619297147763  6.3926390579706176
9.2086663370866884  8.7525568565864926  3.9594799664293823
4.0326068248866909  8.7525568565864926  1.2165789556998341
```

6.3195121995133094 1.5995619297147763 9.1355389920797858  
9.2086663370866884 6.7756216800135078 9.1355389920797858  
1.1434526873133086 3.5764975824852256 1.2165789556998341  
6.3195121995133094 3.5764975824852256 3.9594799664293823  
4.0326068248866909 6.7756216800135078 6.3926390579706176  
6.3926390579706176 1.1434526873133086 1.5995619297147763  
3.9594799664293823 9.2086663370866884 8.7525568565864926  
1.2165789556998341 4.0326068248866909 8.7525568565864926  
9.1355389920797858 6.3195121995133094 1.5995619297147763  
9.1355389920797858 9.2086663370866884 6.7756216800135078  
1.2165789556998341 1.1434526873133086 3.5764975824852256  
3.9594799664293823 6.3195121995133094 3.5764975824852256  
6.3926390579706176 4.0326068248866909 6.7756216800135078  
1.5995619297147763 6.3926390579706176 1.1434526873133086  
8.7525568565864926 3.9594799664293823 9.2086663370866884  
8.7525568565864926 1.2165789556998341 4.0326068248866909  
1.5995619297147763 9.1355389920797858 6.3195121995133094  
6.7756216800135078 9.1355389920797858 9.2086663370866884  
3.5764975824852256 1.2165789556998341 1.1434526873133086  
3.5764975824852256 3.9594799664293823 6.3195121995133094  
6.7756216800135078 6.3926390579706176 4.0326068248866909  
6.3195121995133094 6.7756216800135078 1.2165789556998341  
4.0326068248866909 3.5764975824852256 9.1355389920797858  
9.2086663370866884 3.5764975824852256 6.3926390579706176  
1.1434526873133086 6.7756216800135078 3.9594799664293823  
4.0326068248866909 1.5995619297147763 3.9594799664293823  
6.3195121995133094 8.7525568565864926 6.3926390579706176  
1.1434526873133086 8.7525568565864926 9.1355389920797858  
9.2086663370866884 1.5995619297147763 1.2165789556998341  
1.2165789556998341 6.3195121995133094 6.7756216800135078  
9.1355389920797858 4.0326068248866909 3.5764975824852256  
6.3926390579706176 9.2086663370866884 3.5764975824852256  
3.9594799664293823 1.1434526873133086 6.7756216800135078  
3.9594799664293823 4.0326068248866909 1.5995619297147763  
6.3926390579706176 6.3195121995133094 8.7525568565864926  
9.1355389920797858 1.1434526873133086 8.7525568565864926  
1.2165789556998341 9.2086663370866884 1.5995619297147763  
6.7756216800135078 1.2165789556998341 6.3195121995133094  
3.5764975824852256 9.1355389920797858 4.0326068248866909  
3.5764975824852256 6.3926390579706176 9.2086663370866884  
6.7756216800135078 3.9594799664293823 1.1434526873133086  
1.5995619297147763 3.9594799664293823 4.0326068248866909  
8.7525568565864926 6.3926390579706176 6.3195121995133094  
8.7525568565864926 9.1355389920797858 1.1434526873133086

1.5995619297147763 1.2165789556998341 9.2086663370866884

**Indium Oxide 111 slab 4 -layer:**

In O

1.0000000000000000

14.6383517878741038 0.0000000000000000 0.0000000000000000

7.3191758939370519 12.6771845178323304 0.0000000000000000

0.0000000000000000 0.0000000000000000 51.0694492725965290

In O

64 96

Selective dynamics

Direct

|                    |                    |                    |   |   |   |
|--------------------|--------------------|--------------------|---|---|---|
| 0.7611480013333320 | 0.0111480013333320 | 0.4668317439885570 | F | F | F |
| 0.2388520043333315 | 0.9888520043333315 | 0.4746588917436156 | F | F | F |
| 0.7388519966666678 | 0.4888520196666661 | 0.4746588944350378 | F | F | F |
| 0.2611479936666683 | 0.5111480166666666 | 0.4668317466799934 | F | F | F |
| 0.2277039973333359 | 0.7611480013333320 | 0.4668317439885570 | F | F | F |
| 0.7722959913333298 | 0.2388520043333315 | 0.4746588917436156 | F | F | F |
| 0.7722959836666661 | 0.7388519966666678 | 0.4746588944350378 | F | F | F |
| 0.2277039896666651 | 0.2611479936666683 | 0.4668317466799934 | F | F | F |
| 0.0111480013333320 | 0.2277039973333359 | 0.4668317439885570 | F | F | F |
| 0.9888520043333315 | 0.7722959913333369 | 0.4746588917436156 | F | F | F |
| 0.4888520196666661 | 0.7722959836666661 | 0.4746588944350378 | F | F | F |
| 0.5111480166666666 | 0.2277039896666651 | 0.4668317466799934 | F | F | F |
| 0.0000000000000000 | 0.0000000000000000 | 0.4707453188607431 | F | F | F |
| 0.9999999846666654 | 0.5000000076666637 | 0.4707453242436088 | F | F | F |
| 0.5000000076666637 | 0.5000000076666637 | 0.4707453242436088 | F | F | F |
| 0.5000000076666637 | 0.9999999846666654 | 0.4707453242436088 | F | F | F |
| 0.4268150447265550 | 0.6796171625805012 | 0.5835366971117106 | T | T | T |
| 0.5714614760499686 | 0.3220635869978707 | 0.5335266216303154 | F | F | F |
| 0.0954565668243177 | 0.3446929456050469 | 0.5253897752549719 | F | F | F |
| 0.9051329033591599 | 0.6551433153738012 | 0.5921000788599533 | T | T | T |
| 0.4016988346371438 | 0.1552809583329154 | 0.5919671727589603 | T | T | T |
| 0.5951195294231795 | 0.8450268277640021 | 0.5249275287208306 | F | F | F |
| 0.0713873525637467 | 0.8214752461005688 | 0.5333848297685080 | F | F | F |
| 0.9305254121420153 | 0.1773305328373780 | 0.5839064934888963 | T | T | T |
| 0.8935677926929437 | 0.4268150447265550 | 0.5835366971117106 | T | T | T |
| 0.1064749369521607 | 0.5714614760499686 | 0.5335266216303154 | F | F | F |
| 0.5598504875706354 | 0.0954565668243177 | 0.5253897752549719 | F | F | F |
| 0.4397237812670457 | 0.9051329033591599 | 0.5921000788599533 | T | T | T |
| 0.4430202070299337 | 0.4016988346371438 | 0.5919671727589603 | T | T | T |
| 0.5598536428128256 | 0.5951195294231795 | 0.5249275287208306 | F | F | F |

|                     |                     |                    |   |   |   |
|---------------------|---------------------|--------------------|---|---|---|
| 0.1071374013356774  | 0.0713873525637467  | 0.5333848297685080 | F | F | F |
| 0.8921440550206067  | 0.9305254121420153  | 0.5839064934888963 | T | T | T |
| 0.6796171625804941  | 0.8935677926929508  | 0.5835366971117106 | T | T | T |
| 0.3220635869978707  | 0.1064749369521607  | 0.5335266216303154 | F | F | F |
| 0.3446929456050469  | 0.5598504875706354  | 0.5253897752549719 | F | F | F |
| 0.6551433153738012  | 0.4397237812670457  | 0.5921000788599533 | T | T | T |
| 0.1552809583329154  | 0.4430202070299337  | 0.5919671727589602 | T | T | T |
| 0.8450268277640021  | 0.5598536428128256  | 0.5249275287208306 | F | F | F |
| 0.8214752461005688  | 0.1071374013356774  | 0.5333848297685080 | F | F | F |
| 0.1773305328373780  | 0.8921440550206067  | 0.5839064934888963 | T | T | T |
| 0.6666666666666643  | 0.6666666666666643  | 0.5874002739243488 | T | T | T |
| 0.3333333333333357  | 0.3333333333333357  | 0.5295973615149521 | F | F | F |
| 0.6682830714125604  | 0.1638299843341663  | 0.5877949348437804 | T | T | T |
| 0.3334481086611234  | 0.8333859062698394  | 0.5291799365853791 | F | F | F |
| 0.1638299843341663  | 0.1678869442532665  | 0.5877949348437804 | T | T | T |
| 0.8333859062698394  | 0.8331659850690301  | 0.5291799365853791 | F | F | F |
| 0.1678869442532665  | 0.6682830714125604  | 0.5877949348437804 | T | T | T |
| 0.8331659850690301  | 0.3334481086611234  | 0.5291799365853791 | F | F | F |
| 0.2349896324518080  | 0.9839307463242583  | 0.6478901818116444 | T | T | T |
| 0.7623065310190611  | 0.0125393587037267  | 0.6447609340912068 | T | T | T |
| 0.2664557440181413  | 0.5140248921940725  | 0.6404375517784103 | T | T | T |
| 0.7409772500769854  | 0.4896920356731707  | 0.6501789991012519 | T | T | T |
| 0.7810796212239336  | 0.2349896324518080  | 0.6478901818116444 | T | T | T |
| 0.2251541102772193  | 0.7623065310190611  | 0.6447609340912068 | T | T | T |
| 0.2195193637877866  | 0.2664557440181413  | 0.6404375517784103 | T | T | T |
| 0.7693307142498438  | 0.7409772500769854  | 0.6501789991012519 | T | T | T |
| 0.9839307463242583  | 0.7810796212239336  | 0.6478901818116444 | T | T | T |
| 0.0125393587037267  | 0.2251541102772193  | 0.6447609340912068 | T | T | T |
| 0.5140248921940725  | 0.2195193637877866  | 0.6404375517784103 | T | T | T |
| 0.4896920356731707  | 0.7693307142498438  | 0.6501789991012519 | T | T | T |
| -0.0000000000000000 | 0.0000000000000000  | 0.6506021300924835 | T | T | T |
| -0.0086779028806744 | 0.4963367550934825  | 0.6452443846288979 | T | T | T |
| 0.4963367550934754  | 0.5123411477871991  | 0.6452443846288979 | T | T | T |
| 0.5123411477871920  | -0.0086779028806744 | 0.6452443846288979 | T | T | T |
| 0.8159583373333348  | 0.8601013333333327  | 0.4862116819395084 | F | F | F |
| 0.3946230123333336  | 0.9387660083333316  | 0.4585959608606061 | F | F | F |
| 0.9187303516666674  | 0.1545573616666687  | 0.4501329301675625 | F | F | F |
| 0.1692716669999967  | 0.4334446800000009  | 0.4604640541843779 | F | F | F |
| 0.3239403293333325  | 0.8159583373333348  | 0.4862116819395084 | F | F | F |
| 0.6666109793333348  | 0.3946230123333336  | 0.4585959608606061 | F | F | F |
| 0.9267122866666639  | 0.9187303516666674  | 0.4501329301675625 | F | F | F |
| 0.3972836530000023  | 0.1692716669999967  | 0.4604640541843779 | F | F | F |
| 0.8601013333333327  | 0.3239403293333325  | 0.4862116819395084 | F | F | F |
| 0.9387660083333316  | 0.6666109793333348  | 0.4585959608606061 | F | F | F |

|                    |                    |                    |   |   |   |
|--------------------|--------------------|--------------------|---|---|---|
| 0.1545573616666687 | 0.9267122866666639 | 0.4501329301675625 | F | F | F |
| 0.4334446800000009 | 0.3972836530000023 | 0.4604640541843779 | F | F | F |
| 0.1840416783333296 | 0.1398986823333317 | 0.4552789502821071 | F | F | F |
| 0.6053770033333308 | 0.0612340073333328 | 0.4828946713610023 | F | F | F |
| 0.0812696673333306 | 0.8454426573333365 | 0.4913577008838672 | F | F | F |
| 0.8307283486666677 | 0.5665553356666635 | 0.4810265780372305 | F | F | F |
| 0.6760596393333316 | 0.1840416783333367 | 0.4552789502821071 | F | F | F |
| 0.3333889893333364 | 0.6053770033333308 | 0.4828946713610023 | F | F | F |
| 0.0732876753333329 | 0.0812696673333306 | 0.4913577008838672 | F | F | F |
| 0.6027163156666688 | 0.8307283486666677 | 0.4810265780372305 | F | F | F |
| 0.1398986823333317 | 0.6760596393333316 | 0.4552789502821071 | F | F | F |
| 0.0612340073333328 | 0.3333889893333364 | 0.4828946713610023 | F | F | F |
| 0.8454426573333365 | 0.0732876753333329 | 0.4913577008838672 | F | F | F |
| 0.5665553356666635 | 0.6027163156666688 | 0.4810265780372305 | F | F | F |
| 0.4822796708811169 | 0.5258978442065194 | 0.6026768054048346 | T | T | T |
| 0.5157927795144346 | 0.4732687373369373 | 0.5137680585633078 | F | F | F |
| 0.9389780411721915 | 0.3945739458359014 | 0.5412288865474011 | F | F | F |
| 0.0623485483575514 | 0.6057228516802907 | 0.5762086117887227 | T | T | T |
| 0.4138055884135099 | 0.1792879430058036 | 0.5501013560831254 | F | F | F |
| 0.5858385298172286 | 0.8218081093243726 | 0.5669271082789217 | T | T | T |
| 0.1643402231079705 | 0.8991522013241848 | 0.5396430093322451 | F | F | F |
| 0.8353469811184280 | 0.1020209042567941 | 0.5773767680691313 | T | T | T |
| 0.9918224849123566 | 0.4822796708811169 | 0.6026768054048346 | T | T | T |
| 0.0109384831486281 | 0.5157927795144346 | 0.5137680585633078 | F | F | F |
| 0.6664480129919070 | 0.9389780411721915 | 0.5412288865474011 | F | F | F |
| 0.3319285999621582 | 0.0623485483575514 | 0.5762086117887227 | T | T | T |
| 0.4069064685806794 | 0.4138055884135099 | 0.5501013560831254 | F | F | F |
| 0.5923533608583988 | 0.5858385298172286 | 0.5669271082789217 | T | T | T |
| 0.9365075755678447 | 0.1643402231079705 | 0.5396430093322451 | F | F | F |
| 0.0626321146247776 | 0.8353469811184280 | 0.5773767680691313 | T | T | T |
| 0.5258978442065194 | 0.9918224849123566 | 0.6026768054048346 | T | T | T |
| 0.4732687373369373 | 0.0109384831486281 | 0.5137680585633078 | F | F | F |
| 0.3945739458359014 | 0.6664480129919070 | 0.5412288865474011 | F | F | F |
| 0.6057228516802907 | 0.3319285999621582 | 0.5762086117887227 | T | T | T |
| 0.1792879430058036 | 0.4069064685806794 | 0.5501013560831254 | F | F | F |
| 0.8218081093243726 | 0.5923533608583988 | 0.5669271082789217 | T | T | T |
| 0.8991522013241848 | 0.9365075755678447 | 0.5396430093322451 | F | F | F |
| 0.1020209042567941 | 0.0626321146247777 | 0.5773767680691313 | T | T | T |
| 0.1502078384511734 | 0.1932397001298156 | 0.5448734685138632 | F | F | F |
| 0.8510518588214316 | 0.8053213858262286 | 0.5722788949586387 | T | T | T |
| 0.2733438313663233 | 0.7267838814874855 | 0.6001750856460607 | T | T | T |
| 0.7272745789267816 | 0.2725057257219632 | 0.5171331615441943 | F | F | F |
| 0.7476705288745908 | 0.5125213443154241 | 0.6081495171423553 | T | T | T |
| 0.2523256400471894 | 0.4873897408432910 | 0.5086482917388153 | F | F | F |

|                     |                     |                    |   |   |   |
|---------------------|---------------------|--------------------|---|---|---|
| 0.4945464048176215  | 0.2316890922693524  | 0.5978314766997694 | T | T | T |
| 0.5022127006463535  | 0.7673910184547594  | 0.5188430143373637 | F | F | F |
| 0.6565524614190181  | 0.1502078384511734  | 0.5448734685138632 | F | F | F |
| 0.3436267553523471  | 0.8510518588214316  | 0.5722788949586387 | T | T | T |
| -0.0001277128538083 | 0.2733438313663233  | 0.6001750856460607 | T | T | T |
| 0.0002196953512481  | 0.7272745789267816  | 0.5171331615441943 | F | F | F |
| 0.7398081268099846  | 0.7476705288745908  | 0.6081495171423553 | T | T | T |
| 0.2602846191095196  | 0.2523256400471894  | 0.5086482917388153 | F | F | F |
| 0.2737645029130259  | 0.4945464048176215  | 0.5978314766997694 | T | T | T |
| 0.7303962808988871  | 0.5022127006463535  | 0.5188430143373637 | F | F | F |
| 0.1932397001298156  | 0.6565524614190181  | 0.5448734685138632 | F | F | F |
| 0.8053213858262286  | 0.3436267553523471  | 0.5722788949586387 | T | T | T |
| 0.7267838814874855  | -0.0001277128538083 | 0.6001750856460607 | T | T | T |
| 0.2725057257219632  | 0.0002196953512481  | 0.5171331615441943 | F | F | F |
| 0.5125213443154241  | 0.7398081268099846  | 0.6081495171423553 | T | T | T |
| 0.4873897408432910  | 0.2602846191095196  | 0.5086482917388153 | F | F | F |
| 0.2316890922693524  | 0.2737645029130259  | 0.5978314766997694 | T | T | T |
| 0.7673910184547594  | 0.7303962808988871  | 0.5188430143373637 | F | F | F |
| 0.1856342811281044  | 0.1397128217143142  | 0.6303560185597482 | T | T | T |
| 0.5988040741541907  | 0.0651260422406952  | 0.6576098686347956 | T | T | T |
| 0.0762607439934630  | 0.8388346388277157  | 0.6672244267330413 | T | T | T |
| 0.8266963149495365  | 0.5733092263942499  | 0.6585376016591145 | T | T | T |
| 0.6746528971575885  | 0.1856342811281044  | 0.6303560185597482 | T | T | T |
| 0.3360698836051070  | 0.5988040741541907  | 0.6576098686347956 | T | T | T |
| 0.0849046171788217  | 0.0762607439934630  | 0.6672244267330413 | T | T | T |
| 0.5999944586562138  | 0.8266963149495365  | 0.6585376016591145 | T | T | T |
| 0.1397128217143142  | 0.6746528971575885  | 0.6303560185597482 | T | T | T |
| 0.0651260422406881  | 0.3360698836051070  | 0.6576098686347956 | T | T | T |
| 0.8388346388277157  | 0.0849046171788217  | 0.6672244267330413 | T | T | T |
| 0.5733092263942499  | 0.5999944586562138  | 0.6585376016591145 | T | T | T |
| 0.8189953001512021  | 0.8522854490776554  | 0.6604963597084140 | T | T | T |
| 0.3974934606454716  | 0.9421085130843887  | 0.6354989374091856 | T | T | T |
| 0.9263386281533025  | 0.1507154535200085  | 0.6254122676126569 | T | T | T |
| 0.1717444501059262  | 0.4387933426907797  | 0.6391355415777904 | T | T | T |
| 0.3287192507711429  | 0.8189953001512021  | 0.6604963597084140 | T | T | T |
| 0.6603980262701393  | 0.3974934606454716  | 0.6354989374091856 | T | T | T |
| 0.9229459183266888  | 0.9263386281533025  | 0.6254122676126569 | T | T | T |
| 0.3894622072032801  | 0.1717444501059262  | 0.6391355415777904 | T | T | T |
| 0.8522854490776554  | 0.3287192507711429  | 0.6604963597084140 | T | T | T |
| 0.9421085130843887  | 0.6603980262701393  | 0.6354989374091856 | T | T | T |
| 0.1507154535200085  | 0.9229459183266888  | 0.6254122676126569 | T | T | T |
| 0.4387933426907797  | 0.3894622072032872  | 0.6391355415777904 | T | T | T |

## 5% Indium Tin Oxide 111 slab 4-layer

In Sn O

1.0000000000000000

14.6581653332033461 0.0000000000000000 0.0000000000000000

7.3189795989957736 12.7095316657975506 0.0000000000000000

-0.0098891034462902 -0.0168642175486257 37.7150080587397056

In Sn O

56 8 96

Selective dynamics

Direct

|                    |                    |                    |   |   |   |
|--------------------|--------------------|--------------------|---|---|---|
| 0.7653315393385192 | 0.0161374852239366 | 0.6435081645933587 | T | T | T |
| 0.2403401920921995 | 0.9843309352583415 | 0.6485502793054618 | T | T | T |
| 0.7747591045208870 | 0.2394204691404966 | 0.6483800686841628 | T | T | T |
| 0.0171201704266381 | 0.2164916234212317 | 0.6433793127037039 | T | T | T |
| 0.9850924025978226 | 0.7736755874335244 | 0.6485019319468649 | T | T | T |
| 0.0059649484673707 | 0.5049138758435223 | 0.6455144164011782 | T | T | T |
| 0.4878524429489097 | 0.0043774070039939 | 0.6455591445466102 | T | T | T |
| 0.5711050139140639 | 0.3215061998213713 | 0.7302137251482463 | F | F | F |
| 0.0957725477933451 | 0.3440739638851937 | 0.7190771920085552 | F | F | F |
| 0.9063886786343218 | 0.6527767010205139 | 0.8087135375255059 | F | F | F |
| 0.5954026351313857 | 0.8431342143429106 | 0.7184445361110789 | F | F | F |
| 0.0723481839551638 | 0.8196467319278042 | 0.7300196610483383 | F | F | F |
| 0.9307885756694603 | 0.1763992913457599 | 0.7979755869617478 | F | F | F |
| 0.8957164371836583 | 0.4244187868377196 | 0.7978589715806379 | F | F | F |
| 0.1070672751660240 | 0.5702693439724342 | 0.7302137251482463 | F | F | F |
| 0.5592186766464877 | 0.0954719189441917 | 0.7190771920085552 | F | F | F |
| 0.4400795796531582 | 0.9055157389199593 | 0.8087018218643678 | F | F | F |
| 0.4416205155501487 | 0.4017627172354779 | 0.8098454499965086 | F | F | F |
| 0.5598634887194152 | 0.5938629574054701 | 0.7184445361110789 | F | F | F |
| 0.1070866522751501 | 0.0714678941073643 | 0.7300196610483383 | F | F | F |
| 0.8921137522369804 | 0.9302254526599611 | 0.7977890805655434 | F | F | F |
| 0.6789953658111472 | 0.8946176390393035 | 0.7977501799599764 | F | F | F |
| 0.3217673805293373 | 0.1064662464661481 | 0.7302137251482463 | F | F | F |
| 0.3449483355957312 | 0.5586839063775031 | 0.7190771920085552 | F | F | F |
| 0.6535509999154172 | 0.4395120772944878 | 0.8090326026824641 | F | F | F |
| 0.1560773866552765 | 0.4410035156481129 | 0.8097736832860036 | F | F | F |
| 0.8446059148989562 | 0.5586868263331084 | 0.7184445361110789 | F | F | F |
| 0.8205048314696768 | 0.1071269550956586 | 0.7300196610483383 | F | F | F |
| 0.1769989722453147 | 0.8914156086320162 | 0.7979051351046920 | F | F | F |
| 0.6666879492714344 | 0.6655510953732744 | 0.8027695034783591 | F | F | F |
| 0.6677406932983487 | 0.1646548766865124 | 0.8038889513285525 | F | F | F |
| 0.3340699873820370 | 0.8315250108956107 | 0.7242646141760360 | F | F | F |
| 0.1650179846807021 | 0.1665283836205376 | 0.8039035909519328 | F | F | F |

|                    |                    |                    |   |   |   |
|--------------------|--------------------|--------------------|---|---|---|
| 0.1672973359396082 | 0.6670293019227671 | 0.8039110316670772 | F | F | F |
| 0.8324703755049825 | 0.3328596096534895 | 0.7242646141760360 | F | F | F |
| 0.2354151869841314 | 0.9820587859613802 | 0.8846629452281909 | T | T | T |
| 0.7602392280048886 | 0.0142675101831448 | 0.8799541737624128 | T | T | T |
| 0.2646013125004824 | 0.5126850794368677 | 0.8764483339716923 | T | T | T |
| 0.7824206718794492 | 0.2341398595042763 | 0.8847721756917720 | T | T | T |
| 0.2250314508100036 | 0.7596579617670139 | 0.8800926120617925 | T | T | T |
| 0.2221683601391214 | 0.2639664703770070 | 0.8764307604917408 | T | T | T |
| 0.9827738890147392 | 0.7816125833561294 | 0.8844481889395933 | T | T | T |
| 0.0152325642487348 | 0.2240254805812761 | 0.8802134584741222 | T | T | T |
| 0.5134031573945940 | 0.2213756366701980 | 0.8763967861134278 | T | T | T |
| 0.9944033051766159 | 0.4922216382898523 | 0.8821265844192940 | T | T | T |
| 0.4929364480930268 | 0.5117416046937782 | 0.8823991619214873 | T | T | T |
| 0.5128929029482551 | 0.9935535609248424 | 0.8820475037160356 | T | T | T |
| 0.4254409681199718 | 0.6780430216207378 | 0.7978661016285145 | F | F | F |
| 0.4023745987230143 | 0.1552419140575196 | 0.8098017441906222 | F | F | F |
| 0.3333132055655028 | 0.3327453316617905 | 0.7248359247731742 | F | F | F |
| 0.8333317331272525 | 0.8313056494183115 | 0.7242646141760360 | F | F | F |
| 0.2174243847551536 | 0.7646500650966861 | 0.6432793693824660 | T | T | T |
| 0.5063361909065499 | 0.4870969738757819 | 0.6454965612372460 | T | T | T |
| 0.7777145965370029 | 0.7344134472386821 | 0.6515922884775746 | T | T | T |
| 0.4866892248891798 | 0.7761214374806130 | 0.6515797921027734 | T | T | T |
| 0.7359519376109629 | 0.4854081679863150 | 0.6515889724772299 | T | T | T |
| 0.2291231760984363 | 0.2592188930496532 | 0.6411980834242414 | T | T | T |
| 0.5105216996284582 | 0.2280494353173011 | 0.6411855558830556 | T | T | T |
| 0.2604703050935741 | 0.5095640880321582 | 0.6410952523889828 | T | T | T |
| 0.7714781522659856 | 0.7378721416653589 | 0.8867463062810221 | T | T | T |
| 0.4902169136882806 | 0.7705248237863633 | 0.8868745898820635 | T | T | T |
| 0.0000040251861968 | 0.9991181366149833 | 0.6420511310943048 | T | T | T |
| 0.7385429705299401 | 0.4890748180454206 | 0.8870887213449803 | T | T | T |
| 0.0001892743749116 | 0.9993702559079611 | 0.8862962243919018 | T | T | T |
| 0.8128847962788078 | 0.8623871553854705 | 0.6660916706384856 | T | T | T |
| 0.3990512707572731 | 0.9317657244836631 | 0.6289684180217697 | T | T | T |
| 0.9282916445230562 | 0.1490541981825285 | 0.6187342002380282 | T | T | T |
| 0.1796323144001070 | 0.4226948498019233 | 0.6304798282012730 | T | T | T |
| 0.3233851064699112 | 0.8121779568920053 | 0.6661885402088049 | T | T | T |
| 0.6674831677535488 | 0.3980316275751890 | 0.6289231985707480 | T | T | T |
| 0.9216186749703197 | 0.9273033286670720 | 0.6188288648992356 | T | T | T |
| 0.3958952862158323 | 0.1785625004846714 | 0.6305615976551892 | T | T | T |
| 0.8635393189603404 | 0.3226464750542523 | 0.6661357343796657 | T | T | T |
| 0.9338828394806475 | 0.6660565884020674 | 0.6291199102822672 | T | T | T |
| 0.1500673873717229 | 0.9214182814847695 | 0.6187800044203497 | T | T | T |
| 0.4248002139550602 | 0.3949404428501539 | 0.6307984353728744 | T | T | T |
| 0.1851410116652786 | 0.1471952838307549 | 0.6288519553258761 | T | T | T |



|                    |                    |                    |   |   |   |
|--------------------|--------------------|--------------------|---|---|---|
| 0.5985923820175438 | 0.0629962033908020 | 0.6592480720882988 | T | T | T |
| 0.0701285124192063 | 0.8539389611865432 | 0.6734196984541740 | T | T | T |
| 0.8309607069820527 | 0.5602735940995383 | 0.6551176812614765 | T | T | T |
| 0.6667513679057433 | 0.1842750892352034 | 0.6292168014596106 | T | T | T |
| 0.3372585362946483 | 0.5981708014096350 | 0.6593061027171381 | T | T | T |
| 0.0750908358762660 | 0.0692884910557661 | 0.6735443276309638 | T | T | T |
| 0.6075061083509276 | 0.8295370922075520 | 0.6552706791880827 | T | T | T |
| 0.1480854215327072 | 0.6658847119956143 | 0.6289643317707602 | T | T | T |
| 0.0639621991424914 | 0.3357390019327742 | 0.6593477087983149 | T | T | T |
| 0.8546682809124013 | 0.0747151880287007 | 0.6735674252126823 | T | T | T |
| 0.5621849925066386 | 0.6062786247852121 | 0.6551111782669757 | T | T | T |
| 0.4819466330681834 | 0.5258923831431588 | 0.8246539618970203 | F | F | F |
| 0.5157056528974664 | 0.4723168025344222 | 0.7031710746865940 | F | F | F |
| 0.9382179561018660 | 0.3938357985626055 | 0.7407554663269664 | F | F | F |
| 0.0626635892524305 | 0.6044972003998410 | 0.7880921849138502 | F | F | F |
| 0.4134789539146055 | 0.1791020841611726 | 0.7528988135720383 | F | F | F |
| 0.5867683956551488 | 0.8199001546195532 | 0.7761986296599588 | F | F | F |
| 0.1652751896643423 | 0.8971290675402415 | 0.7385849480023765 | F | F | F |
| 0.8355470658760069 | 0.1014914638698485 | 0.7896423023894599 | F | F | F |
| 0.9918482007875795 | 0.4808909551417528 | 0.8242731809394570 | F | F | F |
| 0.0115883806741621 | 0.5147326163742747 | 0.7031710746865940 | F | F | F |
| 0.6667554280548842 | 0.9368543259418871 | 0.7407554663269664 | F | F | F |
| 0.3321889488676817 | 0.0621498119028630 | 0.7880915589891870 | F | F | F |
| 0.4068903253506875 | 0.4130228565151839 | 0.7528988135720383 | F | F | F |
| 0.5913169259500748 | 0.5860550475720174 | 0.7762899239279122 | F | F | F |
| 0.9354551584237285 | 0.1641872661653920 | 0.7385849480023765 | F | F | F |
| 0.0624652659053098 | 0.8347245993904693 | 0.7897236804358769 | F | F | F |
| 0.5264850111917951 | 0.9904850173670567 | 0.8241636376548414 | F | F | F |
| 0.4726453699615192 | 0.0111632294020509 | 0.7031710746865940 | F | F | F |
| 0.3948988741132311 | 0.6650179164863772 | 0.7407554663269664 | F | F | F |
| 0.6050569934089580 | 0.3321030558730556 | 0.7881165400771053 | F | F | F |
| 0.1795706135457422 | 0.4061412956967914 | 0.7528988135720383 | F | F | F |
| 0.8215334534485592 | 0.5903462489193885 | 0.7762964213878263 | F | F | F |
| 0.8991418888258949 | 0.9343893682713826 | 0.7385849480023765 | F | F | F |
| 0.1019917850961249 | 0.0616889276128205 | 0.7895442927352150 | F | F | F |
| 0.1502554041553523 | 0.1930157623298641 | 0.7457436406118987 | F | F | F |
| 0.8500673711342230 | 0.8049940460776810 | 0.7832733882719722 | F | F | F |
| 0.2713471834514181 | 0.7279110869065732 | 0.8209633488884336 | F | F | F |
| 0.7266437877272409 | 0.2720664091381622 | 0.7077767387407548 | F | F | F |
| 0.7472787429720782 | 0.5115921562756824 | 0.8329885387473510 | F | F | F |
| 0.2526127549163633 | 0.4863993494907461 | 0.6961638816933373 | F | F | F |
| 0.4963822619574572 | 0.2308313654643754 | 0.8182001464552116 | F | F | F |
| 0.5025216625734217 | 0.7656930053037172 | 0.7101169368244840 | F | F | F |
| 0.6558603363579962 | 0.1500934214450282 | 0.7457436406118987 | F | F | F |

|                    |                    |                    |   |   |   |
|--------------------|--------------------|--------------------|---|---|---|
| 0.3441046919316975 | 0.8491841755207261 | 0.7831965268357379 | F | F | F |
| 0.0002185342478072 | 0.2703900300959958 | 0.8210447521411126 | F | F | F |
| 0.0011556798742944 | 0.7256778258794370 | 0.7077767387407548 | F | F | F |
| 0.7402239372597350 | 0.7464657997911175 | 0.8327092288363005 | F | F | F |
| 0.2602591083369674 | 0.2519335125370645 | 0.6961638816933373 | F | F | F |
| 0.2722069786744044 | 0.4954884255899330 | 0.8182498632974529 | F | F | F |
| 0.7300562656035439 | 0.5011895953132282 | 0.7101169368244840 | F | F | F |
| 0.1938240818969916 | 0.6551493419751111 | 0.7457436406118987 | F | F | F |
| 0.8058246900536616 | 0.3434505237801631 | 0.7833462091970986 | F | F | F |
| 0.7284326216060037 | 0.9996919605955696 | 0.8207716627628443 | F | F | F |
| 0.2721399812473635 | 0.0004733764911151 | 0.7077767387407548 | F | F | F |
| 0.5123386499472105 | 0.7397396689742308 | 0.8327598506931437 | F | F | F |
| 0.4870674713351235 | 0.2598722351273111 | 0.6961638816933373 | F | F | F |
| 0.2316693074392120 | 0.2716058580258718 | 0.8182351008347979 | F | F | F |
| 0.7672940286364280 | 0.7287924234005558 | 0.7101169368244840 | F | F | F |
| 0.1873958362810741 | 0.1356743298040105 | 0.8620500981562941 | T | T | T |
| 0.6012281135452135 | 0.0657809860559489 | 0.8990698933654930 | T | T | T |
| 0.0718035612835957 | 0.8490579289678528 | 0.9094816285992341 | T | T | T |
| 0.8203604420644123 | 0.5748134726002356 | 0.8976992094201147 | T | T | T |
| 0.6767318749883519 | 0.1861769803867909 | 0.8620493600222373 | T | T | T |
| 0.3322792966059434 | 0.6006152405391371 | 0.8990421727455046 | T | T | T |
| 0.0788960089916064 | 0.0707791786820711 | 0.9096412037406413 | T | T | T |
| 0.6047827167982147 | 0.8199151705308267 | 0.8976716447555332 | T | T | T |
| 0.1366561308522409 | 0.6755951149171446 | 0.8620698984688029 | T | T | T |
| 0.0666066421268916 | 0.3317961647195632 | 0.8991645875068864 | T | T | T |
| 0.8499963499105688 | 0.0779013023419776 | 0.9096423058829799 | T | T | T |
| 0.5749989843714510 | 0.6035762908864201 | 0.8978937753158578 | T | T | T |
| 0.8146412415360251 | 0.8505633485368123 | 0.8989736255947628 | T | T | T |
| 0.4021642597704417 | 0.9357113220195726 | 0.8689635981649924 | T | T | T |
| 0.9302995269549803 | 0.1445278868131138 | 0.8548824026516594 | T | T | T |
| 0.1697984112079763 | 0.4376400587008143 | 0.8736390404788811 | T | T | T |
| 0.3342263216045910 | 0.8141987866507939 | 0.8993199339253107 | T | T | T |
| 0.6611660626527941 | 0.4007124140975537 | 0.8693449825611932 | T | T | T |
| 0.9248910168943832 | 0.9296460095912181 | 0.8547434652653941 | T | T | T |
| 0.3920356453662486 | 0.1689230994973604 | 0.8735153215215555 | T | T | T |
| 0.8513627886189123 | 0.3331779345956730 | 0.8992143993282868 | T | T | T |
| 0.9368035544750649 | 0.6606653269783971 | 0.8689224150718509 | T | T | T |
| 0.1451601905811134 | 0.9246305207114062 | 0.8547648584532440 | T | T | T |
| 0.4382628588455703 | 0.3911716412117678 | 0.8734533488928589 | T | T | T |

**1H<sub>2</sub>O+Indium Tin Oxide 111 surface:**

In Sn O H

1.0000000000000000

14.6581649780000003 0.0000000000000000 0.0000000000000000

7.3189798837000000 12.7095312472999993 0.0000000000000000

-0.1539904818000000 0.0117322471000000 44.4205346059000021

In Sn O H

56 8 97 2

Selective dynamics

Direct

|                    |                    |                    |   |   |   |
|--------------------|--------------------|--------------------|---|---|---|
| 0.7601300110000011 | 0.0111199609999986 | 0.3212997449999975 | F | F | F |
| 0.2434165649999969 | 0.9854015660000002 | 0.3303952670000001 | F | F | F |
| 0.7751763210000036 | 0.2373103790000002 | 0.3303952670000001 | F | F | F |
| 0.7758184010000022 | 0.7360378240000003 | 0.3303952670000001 | F | F | F |
| 0.0149432030000014 | 0.2262095230000014 | 0.3212997449999975 | F | F | F |
| 0.9921246899999971 | 0.7693967209999997 | 0.3303952670000001 | F | F | F |
| 0.4928005430000013 | 0.7693967209999997 | 0.3303952670000001 | F | F | F |
| 0.0028580700000020 | 0.4978031030000025 | 0.3258475270000005 | F | F | F |
| 0.5041760359999969 | 0.9965305489999992 | 0.3258475270000005 | F | F | F |
| 0.5754696389999978 | 0.3201690450000001 | 0.3988024339999967 | F | F | F |
| 0.1000335600000000 | 0.3427603160000032 | 0.3893470450000009 | F | F | F |
| 0.5996578370000023 | 0.8418218679999967 | 0.3888098850000006 | F | F | F |
| 0.0767109720000008 | 0.8183099729999981 | 0.3986376789999966 | F | F | F |
| 0.1114318609999998 | 0.5689321970000023 | 0.3988024339999967 | F | F | F |
| 0.5634797049999989 | 0.0941582849999989 | 0.3893470450000009 | F | F | F |
| 0.5641186730000030 | 0.5925506089999999 | 0.3888098850000006 | F | F | F |
| 0.1114494420000014 | 0.0701311669999996 | 0.3986376789999966 | F | F | F |
| 0.3261319590000014 | 0.1051290999999992 | 0.3988024339999967 | F | F | F |
| 0.3492093770000011 | 0.5573703139999964 | 0.3893470450000009 | F | F | F |
| 0.8488609910000022 | 0.5573744860000005 | 0.3888098850000006 | F | F | F |
| 0.8248676340000003 | 0.1057902270000000 | 0.3986376789999966 | F | F | F |
| 0.3383793029999964 | 0.8302004350000018 | 0.3937513699999968 | F | F | F |
| 0.8367797049999979 | 0.3315350439999989 | 0.3937513699999968 | F | F | F |
| 0.7420985669999993 | 0.4866741200000035 | 0.3303952670000001 | F | F | F |
| 0.3376278109999973 | 0.3314195660000010 | 0.3942364460000007 | F | F | F |
| 0.8376410449999980 | 0.8299810290000025 | 0.3937513699999968 | F | F | F |
| 0.7615584035293913 | 0.0087520487172602 | 0.5238950073362538 | T | T | T |
| 0.9125551308566511 | 0.6504713154809930 | 0.4656770032778365 | T | T | T |
| 0.4310506726422199 | 0.6748287436429844 | 0.4569246488020938 | T | T | T |
| 0.9335401169167987 | 0.1753552645178284 | 0.4572446287585232 | T | T | T |
| 0.4084592762247033 | 0.1532063153910794 | 0.4664668928494798 | T | T | T |
| 0.2356528478893930 | 0.7537109614546720 | 0.5263131252312182 | T | T | T |
| 0.4451023752214313 | 0.9036555771349299 | 0.4658479630353575 | T | T | T |

|                    |                    |                    |   |   |   |
|--------------------|--------------------|--------------------|---|---|---|
| 0.9012292484034052 | 0.4230546880295980 | 0.4560805874424709 | T | T | T |
| 0.7690310266410576 | 0.2492143701121721 | 0.5334504959741491 | T | T | T |
| 0.8974683713136010 | 0.9283474884386469 | 0.4559078162916792 | T | T | T |
| 0.4468885330300804 | 0.4008560913640376 | 0.4664088080798154 | T | T | T |
| 0.2277409334804635 | 0.2616931920818172 | 0.5228895461297750 | T | T | T |
| 0.0162916430349330 | 0.2248816599257113 | 0.5266235743518269 | T | T | T |
| 0.6574488991130228 | 0.4400615008990582 | 0.4637096619028689 | T | T | T |
| 0.6842645990130408 | 0.8918331669538594 | 0.4559056655880352 | T | T | T |
| 0.1831378703254637 | 0.8894154658110910 | 0.4560576541228744 | T | T | T |
| 0.1619337786165731 | 0.4386636287558466 | 0.4663757621141122 | T | T | T |
| 0.5213436688908557 | 0.2187599986550235 | 0.5231942044443656 | T | T | T |
| 0.6725572004432990 | 0.6652905069836750 | 0.4603305055794089 | T | T | T |
| 0.0011880989936390 | 0.4903215962994137 | 0.5278994353901906 | T | T | T |
| 0.6730626919933196 | 0.1635890682613983 | 0.4612216385333128 | T | T | T |
| 0.5121410086544086 | 0.4898645475511619 | 0.5307423437149390 | T | T | T |
| 0.1695806316188887 | 0.1648295534763178 | 0.4615616459084023 | T | T | T |
| 0.5171631218563859 | 0.9912670277159779 | 0.5277650661092768 | T | T | T |
| 0.1728815465269009 | 0.6650605773716669 | 0.4613334509138632 | T | T | T |
| 0.2423422881482818 | 0.9807544791897264 | 0.5301193208224891 | T | T | T |
| 0.2719403600556778 | 0.5104629508865992 | 0.5226598966494492 | T | T | T |
| 0.9895456435290717 | 0.7808717103892403 | 0.5296185702720881 | T | T | T |
| 0.2318915720000021 | 0.7582958650000009 | 0.3212997449999975 | F | F | F |
| 0.5035339559999983 | 0.4978031030000025 | 0.3258475270000005 | F | F | F |
| 0.2312494130000005 | 0.2595683819999977 | 0.3212997449999975 | F | F | F |
| 0.5142674240000034 | 0.2262095040000034 | 0.3212997449999975 | F | F | F |
| 0.2649692749999986 | 0.5089321609999971 | 0.3212997449999975 | F | F | F |
| 0.0035676700000025 | 0.9990756250000032 | 0.3258475270000005 | F | F | F |
| 0.7454414853853286 | 0.4885376933057337 | 0.5301719182813054 | T | T | T |
| 0.7774940336704730 | 0.7357449321731063 | 0.5319021965502452 | T | T | T |
| 0.4977334144388732 | 0.7648315376253200 | 0.5324517237930971 | T | T | T |
| 0.0107489999033116 | 0.9971891325980335 | 0.5294931097048081 | T | T | T |
| 0.8197246590000020 | 0.8569508429999999 | 0.3438201640000003 | F | F | F |
| 0.3987081670000023 | 0.9354814869999970 | 0.3117293459999999 | F | F | F |
| 0.9209922539999980 | 0.1532890789999968 | 0.3018949180000021 | F | F | F |
| 0.1730363100000005 | 0.4314418040000021 | 0.3139001839999978 | F | F | F |
| 0.3283148679999996 | 0.8129202289999995 | 0.3438201640000003 | F | F | F |
| 0.6696297120000025 | 0.3927234279999965 | 0.3117293459999999 | F | F | F |
| 0.9299447499999971 | 0.9155171419999988 | 0.3018949180000021 | F | F | F |
| 0.4004008089999971 | 0.1679411770000030 | 0.3139001839999978 | F | F | F |
| 0.8631193249999995 | 0.3221544190000003 | 0.3438201640000003 | F | F | F |
| 0.9417661310000014 | 0.6640191489999978 | 0.3117293459999999 | F | F | F |
| 0.1588438120000006 | 0.9234787780000033 | 0.3018949180000021 | F | F | F |
| 0.4368057220000026 | 0.3953728259999991 | 0.3139001839999978 | F | F | F |
| 0.1873433459999987 | 0.1386553729999989 | 0.3078748470000008 | F | F | F |

|                    |                    |                    |   |   |   |
|--------------------|--------------------|--------------------|---|---|---|
| 0.6083596860000000 | 0.0601247049999998 | 0.3399656449999995 | F | F | F |
| 0.0860756719999998 | 0.8423171000000025 | 0.3498000940000026 | F | F | F |
| 0.8340316199999975 | 0.5641643649999963 | 0.3377948270000033 | F | F | F |
| 0.6787528939999987 | 0.1826860150000016 | 0.3078748470000008 | F | F | F |
| 0.3374381340000028 | 0.6028827789999980 | 0.3399656449999995 | F | F | F |
| 0.0771230949999975 | 0.0800890829999972 | 0.3498000940000026 | F | F | F |
| 0.6066670510000023 | 0.8276650669999981 | 0.3377948270000033 | F | F | F |
| 0.1439485069999975 | 0.6734517499999981 | 0.3078748470000008 | F | F | F |
| 0.0653017340000019 | 0.3315870200000006 | 0.3399656449999995 | F | F | F |
| 0.8482241079999966 | 0.0721274100000002 | 0.3498000940000026 | F | F | F |
| 0.5702620779999990 | 0.6002333420000028 | 0.3377948270000033 | F | F | F |
| 0.5198188029999997 | 0.4710367289999979 | 0.3758420030000025 | F | F | F |
| 0.9426806099999965 | 0.3924763870000021 | 0.4077528669999992 | F | F | F |
| 0.4180544709999978 | 0.1777170419999976 | 0.4180630740000026 | F | F | F |
| 0.1697175740000034 | 0.8957742600000032 | 0.4059099489999980 | F | F | F |
| 0.0157015099999995 | 0.5134525650000015 | 0.3758420030000025 | F | F | F |
| 0.6712180939999968 | 0.9354948960000016 | 0.4077528669999992 | F | F | F |
| 0.4114658740000010 | 0.4116378180000027 | 0.4180630740000026 | F | F | F |
| 0.9398975889999974 | 0.1628324400000025 | 0.4059099489999980 | F | F | F |
| 0.4767584659999997 | 0.0098831760000024 | 0.3758420030000025 | F | F | F |
| 0.3993614999999977 | 0.6636584279999980 | 0.4077528669999992 | F | F | F |
| 0.1841461659999979 | 0.4047562530000022 | 0.4180630740000026 | F | F | F |
| 0.9035842740000035 | 0.9330345110000025 | 0.4059099489999980 | F | F | F |
| 0.1547643999999977 | 0.1916458330000026 | 0.4119880140000021 | F | F | F |
| 0.7307997249999971 | 0.2707766190000029 | 0.3797524499999980 | F | F | F |
| 0.2566607179999991 | 0.4851340860000022 | 0.3698926240000020 | F | F | F |
| 0.5066994279999975 | 0.7643982149999999 | 0.3817393400000029 | F | F | F |
| 0.6603693220000011 | 0.1487234940000022 | 0.4119880140000021 | F | F | F |
| 0.0053115979999987 | 0.7243880719999964 | 0.3797524499999980 | F | F | F |
| 0.2643070809999983 | 0.2506682470000001 | 0.3698926240000020 | F | F | F |
| 0.7342340009999972 | 0.4998948420000033 | 0.3817393400000029 | F | F | F |
| 0.1983331229999976 | 0.6537793850000000 | 0.4119880140000021 | F | F | F |
| 0.2762958710000021 | 0.9991835909999978 | 0.3797524499999980 | F | F | F |
| 0.4911154050000022 | 0.2586069589999980 | 0.3698926240000020 | F | F | F |
| 0.7714716719999970 | 0.7274976870000032 | 0.3817393400000029 | F | F | F |
| 0.8221623456045107 | 0.8494157790190392 | 0.5420822500024455 | T | T | T |
| 0.8556192786036849 | 0.8029434809178353 | 0.4439430946512725 | T | T | T |
| 0.2761593343827474 | 0.7268414290725083 | 0.4759496274398830 | T | T | T |
| 0.4072146367637623 | 0.9336250430016677 | 0.5168000884088012 | T | T | T |
| 0.7560030383754824 | 0.5132832356862187 | 0.4850025076486231 | T | T | T |
| 0.9247519631730121 | 0.1477543511121162 | 0.5073569188601482 | T | T | T |
| 0.5035608853884845 | 0.2276219916493723 | 0.4736418251597483 | T | T | T |
| 0.1762921626057098 | 0.4357822791619669 | 0.5207300257981592 | T | T | T |
| 0.3392357354158048 | 0.8125216235262860 | 0.5428079706434810 | T | T | T |

|                    |                    |                    |   |   |   |
|--------------------|--------------------|--------------------|---|---|---|
| 0.3498324291697921 | 0.8468842164631080 | 0.4439362054452635 | T | T | T |
| 0.0035243467528368 | 0.2684127447734563 | 0.4764470390898000 | T | T | T |
| 0.6746735493428883 | 0.4013295571364937 | 0.5111158042947721 | T | T | T |
| 0.7474387952638043 | 0.7445515490501819 | 0.4859594000927039 | T | T | T |
| 0.9266374638811388 | 0.9346165443482369 | 0.5051220916877253 | T | T | T |
| 0.2766700660718791 | 0.4943856250829641 | 0.4733283938450172 | T | T | T |
| 0.3981318043686891 | 0.1664281530793776 | 0.5203845969634159 | T | T | T |
| 0.8532859356150537 | 0.3362553328108892 | 0.5440279280925249 | T | T | T |
| 0.8111234915928358 | 0.3413535113269450 | 0.4436253524670159 | T | T | T |
| 0.7337815804874541 | 0.9973540341155893 | 0.4746770770804905 | T | T | T |
| 0.9432199847386211 | 0.6591707489648064 | 0.5172372954797161 | T | T | T |
| 0.5188159844456117 | 0.7375125266298799 | 0.4862731024639698 | T | T | T |
| 0.1527159979619030 | 0.9226450858785825 | 0.5042597516147634 | T | T | T |
| 0.2373831712739148 | 0.2692312923134597 | 0.4736130521045064 | T | T | T |
| 0.4425437595984124 | 0.3863718366150494 | 0.5186508783017063 | T | T | T |
| 0.4873704326745474 | 0.5232296921560432 | 0.4797479524202405 | T | T | T |
| 0.1900044978031382 | 0.1353471680496554 | 0.5110250298514251 | T | T | T |
| 0.6065583230792474 | 0.0628904924892250 | 0.5423905497155733 | T | T | T |
| 0.0680334700346623 | 0.6023496784472316 | 0.4480359823727653 | T | T | T |
| 0.0767221765306999 | 0.8500395843530022 | 0.5507936976263885 | T | T | T |
| 0.5911733078737784 | 0.8190275411617618 | 0.4378918491363379 | T | T | T |
| 0.8264928691387370 | 0.5723294221631429 | 0.5408782970138555 | T | T | T |
| 0.8405079086185920 | 0.0996536873927830 | 0.4492718576534137 | T | T | T |
| 0.9983883361179768 | 0.4779582946175980 | 0.4788900277114232 | T | T | T |
| 0.6878863026802703 | 0.1779052092235466 | 0.5109670036385096 | T | T | T |
| 0.3452132231934866 | 0.5925806171354844 | 0.5418931300714772 | T | T | T |
| 0.3373478236097863 | 0.0604649733984651 | 0.4481682149611742 | T | T | T |
| 0.0844924296010247 | 0.0687943446744618 | 0.5512834788980031 | T | T | T |
| 0.5960694401334049 | 0.5869793339027569 | 0.4376635153986454 | T | T | T |
| 0.6113465311042646 | 0.8175631514786346 | 0.5413126907656307 | T | T | T |
| 0.0671814056675110 | 0.8330086195342993 | 0.4497305522627146 | T | T | T |
| 0.5330357037844031 | 0.9882879382343780 | 0.4787671336170644 | T | T | T |
| 0.1432367639440039 | 0.6748704469240598 | 0.5109463803239942 | T | T | T |
| 0.0719461091680611 | 0.3297778024734172 | 0.5422727155386010 | T | T | T |
| 0.6099365536250619 | 0.3296588779808518 | 0.4475443792838331 | T | T | T |
| 0.8559174157746791 | 0.0753745704922338 | 0.5543897563084966 | T | T | T |
| 0.8272750730951558 | 0.5900975112832058 | 0.4376810432536119 | T | T | T |
| 0.5870775730215472 | 0.5942383782784488 | 0.5416729730345109 | T | T | T |
| 0.1052609773159729 | 0.0606765291652588 | 0.4496300735779758 | T | T | T |
| 0.6207110754162842 | 0.3424744610186433 | 0.5611884077185411 | T | T | T |
| 0.8623089426688795 | 0.0625629567901143 | 0.5760890522771152 | T | T | T |
| 0.6242105876699354 | 0.3497604314438134 | 0.5829047481428148 | T | T | T |

**2H<sub>2</sub>O+Indium Tin Oxide 111 surface:**

In Sn O H

1.0000000000000000

14.6581649780000003 0.0000000000000000 0.0000000000000000

7.3189798837000000 12.7095312472999993 0.0000000000000000

-0.1539904818000000 0.0117322471000000 44.4205346059000021

In Sn O H

56 8 98 4

Selective dynamics

Direct

|                    |                    |                    |   |   |   |
|--------------------|--------------------|--------------------|---|---|---|
| 0.7601300110000011 | 0.0111199609999986 | 0.3212997449999975 | F | F | F |
| 0.2434165649999969 | 0.9854015660000002 | 0.3303952670000001 | F | F | F |
| 0.7751763210000036 | 0.2373103790000002 | 0.3303952670000001 | F | F | F |
| 0.7758184010000022 | 0.7360378240000003 | 0.3303952670000001 | F | F | F |
| 0.0149432030000014 | 0.2262095230000014 | 0.3212997449999975 | F | F | F |
| 0.9921246899999971 | 0.7693967209999997 | 0.3303952670000001 | F | F | F |
| 0.4928005430000013 | 0.7693967209999997 | 0.3303952670000001 | F | F | F |
| 0.0028580700000020 | 0.4978031030000025 | 0.3258475270000005 | F | F | F |
| 0.5041760359999969 | 0.9965305489999992 | 0.3258475270000005 | F | F | F |
| 0.5754696389999978 | 0.3201690450000001 | 0.3988024339999967 | F | F | F |
| 0.1000335600000000 | 0.3427603160000032 | 0.3893470450000009 | F | F | F |
| 0.5996578370000023 | 0.8418218679999967 | 0.3888098850000006 | F | F | F |
| 0.0767109720000008 | 0.8183099729999981 | 0.3986376789999966 | F | F | F |
| 0.1114318609999998 | 0.5689321970000023 | 0.3988024339999967 | F | F | F |
| 0.5634797049999989 | 0.0941582849999989 | 0.3893470450000009 | F | F | F |
| 0.5641186730000030 | 0.5925506089999999 | 0.3888098850000006 | F | F | F |
| 0.1114494420000014 | 0.0701311669999996 | 0.3986376789999966 | F | F | F |
| 0.3261319590000014 | 0.1051290999999992 | 0.3988024339999967 | F | F | F |
| 0.3492093770000011 | 0.5573703139999964 | 0.3893470450000009 | F | F | F |
| 0.8488609910000022 | 0.5573744860000005 | 0.3888098850000006 | F | F | F |
| 0.8248676340000003 | 0.1057902270000000 | 0.3986376789999966 | F | F | F |
| 0.3383793029999964 | 0.8302004350000018 | 0.3937513699999968 | F | F | F |
| 0.8367797049999979 | 0.3315350439999989 | 0.3937513699999968 | F | F | F |
| 0.7420985669999993 | 0.4866741200000035 | 0.3303952670000001 | F | F | F |
| 0.3376278109999973 | 0.3314195660000010 | 0.3942364460000007 | F | F | F |
| 0.8376410449999980 | 0.8299810290000025 | 0.3937513699999968 | F | F | F |
| 0.7639705255969422 | 0.0034794317205695 | 0.5248252552722655 | T | T | T |
| 0.9107410976162740 | 0.6494111958225804 | 0.4637065476672530 | T | T | T |
| 0.4319665142592354 | 0.6742161915139266 | 0.4566565712510678 | T | T | T |
| 0.9328211692597383 | 0.1760288790476442 | 0.4570310232826590 | T | T | T |
| 0.4079036930703649 | 0.1535338859619266 | 0.4665222138817400 | T | T | T |
| 0.2454342942251024 | 0.7477969515305418 | 0.5244074713185854 | T | T | T |
| 0.4441018242898551 | 0.9038616117043732 | 0.4659429695689925 | T | T | T |

|                    |                    |                    |   |   |   |
|--------------------|--------------------|--------------------|---|---|---|
| 0.9028017582343467 | 0.4232551440414465 | 0.4566396157094034 | T | T | T |
| 0.7676348873329391 | 0.2502591524969600 | 0.5335143642248674 | T | T | T |
| 0.8989074364950588 | 0.9256092056299575 | 0.4567938971098363 | T | T | T |
| 0.4467537942570619 | 0.4008539570903005 | 0.4664994690277501 | T | T | T |
| 0.2263581875999879 | 0.2634476939600633 | 0.5228307498530078 | T | T | T |
| 0.0150290037763820 | 0.2302540215086665 | 0.5267386844018801 | T | T | T |
| 0.6582106776150131 | 0.4393211099039652 | 0.4637283860898094 | T | T | T |
| 0.6827619376827624 | 0.8926595699240537 | 0.4557751513437889 | T | T | T |
| 0.1826185428585200 | 0.8895233714637996 | 0.4560740020653922 | T | T | T |
| 0.1607165600341713 | 0.4388461745706175 | 0.4665286244341810 | T | T | T |
| 0.5220122126222410 | 0.2177595251050583 | 0.5231482788253138 | T | T | T |
| 0.6701637124161509 | 0.6659853983376748 | 0.4600117652909397 | T | T | T |
| 0.0069873102990937 | 0.5031904078088718 | 0.5307428236926376 | T | T | T |
| 0.6742220531573505 | 0.1622486649668923 | 0.4616149781899727 | T | T | T |
| 0.5146890233001640 | 0.4881325801327955 | 0.5306563444403981 | T | T | T |
| 0.1695751125890548 | 0.1648816641999999 | 0.4616397261186507 | T | T | T |
| 0.5161304191955779 | 0.9917200718573305 | 0.5277362145749843 | T | T | T |
| 0.1710205555750540 | 0.6652293823626929 | 0.4614711406448285 | T | T | T |
| 0.2400196615029175 | 0.9813549319422417 | 0.5301282659348397 | T | T | T |
| 0.2719629524618298 | 0.5110019496145995 | 0.5229009811035631 | T | T | T |
| 0.9925429243136311 | 0.7590362076898868 | 0.5342594424852440 | T | T | T |
| 0.2318915720000021 | 0.7582958650000009 | 0.3212997449999975 | F | F | F |
| 0.5035339559999983 | 0.4978031030000025 | 0.3258475270000005 | F | F | F |
| 0.2312494130000005 | 0.2595683819999977 | 0.3212997449999975 | F | F | F |
| 0.5142674240000034 | 0.2262095040000034 | 0.3212997449999975 | F | F | F |
| 0.2649692749999986 | 0.5089321609999971 | 0.3212997449999975 | F | F | F |
| 0.0035676700000025 | 0.9990756250000032 | 0.3258475270000005 | F | F | F |
| 0.7470734657613546 | 0.4899935603316254 | 0.5301938379247912 | T | T | T |
| 0.7751282055706948 | 0.7363128932820537 | 0.5301225789102920 | T | T | T |
| 0.4981246744705194 | 0.7646585113335728 | 0.5327984581969092 | T | T | T |
| 0.0051670421885755 | 0.0021384522068079 | 0.5281986062571353 | T | T | T |
| 0.8197246590000020 | 0.8569508429999999 | 0.3438201640000003 | F | F | F |
| 0.3987081670000023 | 0.9354814869999970 | 0.3117293459999999 | F | F | F |
| 0.9209922539999980 | 0.1532890789999968 | 0.3018949180000021 | F | F | F |
| 0.1730363100000005 | 0.4314418040000021 | 0.3139001839999978 | F | F | F |
| 0.3283148679999996 | 0.8129202289999995 | 0.3438201640000003 | F | F | F |
| 0.6696297120000025 | 0.3927234279999965 | 0.3117293459999999 | F | F | F |
| 0.9299447499999971 | 0.9155171419999988 | 0.3018949180000021 | F | F | F |
| 0.4004008089999971 | 0.1679411770000030 | 0.3139001839999978 | F | F | F |
| 0.8631193249999995 | 0.3221544190000003 | 0.3438201640000003 | F | F | F |
| 0.9417661310000014 | 0.6640191489999978 | 0.3117293459999999 | F | F | F |
| 0.1588438120000006 | 0.9234787780000033 | 0.3018949180000021 | F | F | F |
| 0.4368057220000026 | 0.3953728259999991 | 0.3139001839999978 | F | F | F |
| 0.1873433459999987 | 0.1386553729999989 | 0.3078748470000008 | F | F | F |



|                    |                    |                    |   |   |   |
|--------------------|--------------------|--------------------|---|---|---|
| 0.6083596860000000 | 0.0601247049999998 | 0.3399656449999995 | F | F | F |
| 0.0860756719999998 | 0.8423171000000025 | 0.3498000940000026 | F | F | F |
| 0.8340316199999975 | 0.5641643649999963 | 0.3377948270000033 | F | F | F |
| 0.6787528939999987 | 0.1826860150000016 | 0.3078748470000008 | F | F | F |
| 0.3374381340000028 | 0.6028827789999980 | 0.3399656449999995 | F | F | F |
| 0.0771230949999975 | 0.0800890829999972 | 0.3498000940000026 | F | F | F |
| 0.6066670510000023 | 0.8276650669999981 | 0.3377948270000033 | F | F | F |
| 0.1439485069999975 | 0.6734517499999981 | 0.3078748470000008 | F | F | F |
| 0.0653017340000019 | 0.3315870200000006 | 0.3399656449999995 | F | F | F |
| 0.8482241079999966 | 0.0721274100000002 | 0.3498000940000026 | F | F | F |
| 0.5702620779999990 | 0.6002333420000028 | 0.3377948270000033 | F | F | F |
| 0.5198188029999997 | 0.4710367289999979 | 0.3758420030000025 | F | F | F |
| 0.9426806099999965 | 0.3924763870000021 | 0.4077528669999992 | F | F | F |
| 0.4180544709999978 | 0.1777170419999976 | 0.4180630740000026 | F | F | F |
| 0.1697175740000034 | 0.8957742600000032 | 0.4059099489999980 | F | F | F |
| 0.0157015099999995 | 0.5134525650000015 | 0.3758420030000025 | F | F | F |
| 0.6712180939999968 | 0.9354948960000016 | 0.4077528669999992 | F | F | F |
| 0.4114658740000010 | 0.4116378180000027 | 0.4180630740000026 | F | F | F |
| 0.9398975889999974 | 0.1628324400000025 | 0.4059099489999980 | F | F | F |
| 0.4767584659999997 | 0.0098831760000024 | 0.3758420030000025 | F | F | F |
| 0.3993614999999977 | 0.6636584279999980 | 0.4077528669999992 | F | F | F |
| 0.1841461659999979 | 0.4047562530000022 | 0.4180630740000026 | F | F | F |
| 0.9035842740000035 | 0.9330345110000025 | 0.4059099489999980 | F | F | F |
| 0.1547643999999977 | 0.1916458330000026 | 0.4119880140000021 | F | F | F |
| 0.7307997249999971 | 0.2707766190000029 | 0.3797524499999980 | F | F | F |
| 0.2566607179999991 | 0.4851340860000022 | 0.3698926240000020 | F | F | F |
| 0.5066994279999975 | 0.7643982149999999 | 0.3817393400000029 | F | F | F |
| 0.6603693220000011 | 0.1487234940000022 | 0.4119880140000021 | F | F | F |
| 0.0053115979999987 | 0.7243880719999964 | 0.3797524499999980 | F | F | F |
| 0.2643070809999983 | 0.2506682470000001 | 0.3698926240000020 | F | F | F |
| 0.7342340009999972 | 0.4998948420000033 | 0.3817393400000029 | F | F | F |
| 0.1983331229999976 | 0.6537793850000000 | 0.4119880140000021 | F | F | F |
| 0.2762958710000021 | 0.9991835909999978 | 0.3797524499999980 | F | F | F |
| 0.4911154050000022 | 0.2586069589999980 | 0.3698926240000020 | F | F | F |
| 0.7714716719999970 | 0.7274976870000032 | 0.3817393400000029 | F | F | F |
| 0.8217399443824909 | 0.8445370309670617 | 0.5441289458983473 | T | T | T |
| 0.8547062811636078 | 0.8032343334412330 | 0.4434058131340041 | T | T | T |
| 0.2766441895917506 | 0.7257492920862533 | 0.4750007898213772 | T | T | T |
| 0.4056373397412386 | 0.9339516796862477 | 0.5167421047332658 | T | T | T |
| 0.7557876181304992 | 0.5138450154872161 | 0.4848104400926874 | T | T | T |
| 0.9221571735087293 | 0.1499044724482664 | 0.5068423360037236 | T | T | T |
| 0.5044559236563504 | 0.2267054174158241 | 0.4735701872289388 | T | T | T |
| 0.1800356114361212 | 0.4345053730253434 | 0.5189750437000138 | T | T | T |
| 0.3369212208842882 | 0.8139924921532972 | 0.5432841412834667 | T | T | T |

|                    |                    |                    |   |   |   |
|--------------------|--------------------|--------------------|---|---|---|
| 0.3488324154217526 | 0.8470342924430412 | 0.4438807375073738 | T | T | T |
| 0.0036689852994882 | 0.2675625673005285 | 0.4763090285258825 | T | T | T |
| 0.6759720091619406 | 0.4009611434053461 | 0.5110094527300237 | T | T | T |
| 0.7395582490814747 | 0.7484885281669814 | 0.4847523278616764 | T | T | T |
| 0.9330460721366194 | 0.9235211905244726 | 0.5080121830447109 | T | T | T |
| 0.2761007564467969 | 0.4962437668220597 | 0.4732651747177492 | T | T | T |
| 0.3975346728738460 | 0.1668364346375780 | 0.5205477312200024 | T | T | T |
| 0.8532418742155053 | 0.3366338671961828 | 0.5442565340881270 | T | T | T |
| 0.8117146007955647 | 0.3417433322177157 | 0.4434769134328926 | T | T | T |
| 0.7361262716083395 | 0.9946325093924722 | 0.4755758799507948 | T | T | T |
| 0.9330941520367882 | 0.6661653233917869 | 0.5111854891832867 | T | T | T |
| 0.5171404979474922 | 0.7375530586698424 | 0.4862066164616818 | T | T | T |
| 0.1504630224783464 | 0.9173152152066918 | 0.5053345122132658 | T | T | T |
| 0.2373539410739301 | 0.2684313880211079 | 0.4734574075721097 | T | T | T |
| 0.4433545763101348 | 0.3858608756087858 | 0.5185273798878630 | T | T | T |
| 0.4878608770435631 | 0.5230254939497765 | 0.4796080542965258 | T | T | T |
| 0.1877808547747525 | 0.1364130751430420 | 0.5114632793242244 | T | T | T |
| 0.6069537418099628 | 0.0619986255207131 | 0.5425225029242006 | T | T | T |
| 0.0679610954717491 | 0.6022374347494556 | 0.4474839158977964 | T | T | T |
| 0.0750445387517675 | 0.8502451446986955 | 0.5548438034415659 | T | T | T |
| 0.5884133856317614 | 0.8201566290579860 | 0.4374149648774323 | T | T | T |
| 0.8265988500189644 | 0.5763587219427719 | 0.5408553496443065 | T | T | T |
| 0.8420295213268855 | 0.0971650482869232 | 0.4496678068582453 | T | T | T |
| 0.9985145859751503 | 0.4786712038915131 | 0.4797210469321442 | T | T | T |
| 0.6893080613523983 | 0.1751101065980035 | 0.5114428108460526 | T | T | T |
| 0.3483671732220122 | 0.5906456551071810 | 0.5420363602181367 | T | T | T |
| 0.3366532519104871 | 0.0603443183512943 | 0.4480070790604437 | T | T | T |
| 0.0806719052730237 | 0.0692629115118877 | 0.5508955684106341 | T | T | T |
| 0.5960840243992285 | 0.5860997134349523 | 0.4373963055437255 | T | T | T |
| 0.6120404684639037 | 0.8180402845399440 | 0.5410000514591828 | T | T | T |
| 0.0672074175739384 | 0.8329779076002519 | 0.4497700935803806 | T | T | T |
| 0.5318615981767091 | 0.9891661064277939 | 0.4786602174559813 | T | T | T |
| 0.1444178217051190 | 0.6791659223235204 | 0.5118761981098265 | T | T | T |
| 0.0700567310137285 | 0.3372973639168889 | 0.5419424076134794 | T | T | T |
| 0.6103868212194952 | 0.3288980731710757 | 0.4476217086756698 | T | T | T |
| 0.8554827269816121 | 0.0758025609340026 | 0.5548383709487622 | T | T | T |
| 0.8249629205888838 | 0.5894935762186420 | 0.4371395435432012 | T | T | T |
| 0.5879128320137462 | 0.5932629322226302 | 0.5417151619515665 | T | T | T |
| 0.1052390973012288 | 0.0600910635197273 | 0.4498593209325323 | T | T | T |
| 0.6202664125728243 | 0.3428339292406924 | 0.5616445406759425 | T | T | T |
| 0.0409572884073298 | 0.6121780784189637 | 0.5619275815717233 | T | T | T |
| 0.8625429254776595 | 0.0658520152430336 | 0.5766461021748798 | T | T | T |
| 0.6261690417398700 | 0.3541516823047472 | 0.5830157901812925 | T | T | T |
| 0.0328314143648956 | 0.6133449079000337 | 0.5837012336934482 | T | T | T |

0.0863860406350398 0.8550451423008540 0.5763503128632314 T T T

**3H<sub>2</sub>O+Indium Tin Oxide 111 surface:**

In Sn O H

1.0000000000000000

14.6581649780000003 0.0000000000000000 0.0000000000000000

7.3189798837000000 12.7095312472999993 0.0000000000000000

-0.1539904818000000 0.0117322471000000 44.4205346059000021

In Sn O H

56 8 99 6

Selective dynamics

Direct

|                    |                    |                    |   |   |   |
|--------------------|--------------------|--------------------|---|---|---|
| 0.7601300110000011 | 0.0111199609999986 | 0.3212997449999975 | F | F | F |
| 0.2434165649999969 | 0.9854015660000002 | 0.3303952670000001 | F | F | F |
| 0.7751763210000036 | 0.2373103790000002 | 0.3303952670000001 | F | F | F |
| 0.7758184010000022 | 0.7360378240000003 | 0.3303952670000001 | F | F | F |
| 0.0149432030000014 | 0.2262095230000014 | 0.3212997449999975 | F | F | F |
| 0.9921246899999971 | 0.7693967209999997 | 0.3303952670000001 | F | F | F |
| 0.4928005430000013 | 0.7693967209999997 | 0.3303952670000001 | F | F | F |
| 0.0028580700000020 | 0.4978031030000025 | 0.3258475270000005 | F | F | F |
| 0.5041760359999969 | 0.9965305489999992 | 0.3258475270000005 | F | F | F |
| 0.5754696389999978 | 0.3201690450000001 | 0.3988024339999967 | F | F | F |
| 0.1000335600000000 | 0.3427603160000032 | 0.3893470450000009 | F | F | F |
| 0.5996578370000023 | 0.8418218679999967 | 0.3888098850000006 | F | F | F |
| 0.0767109720000008 | 0.8183099729999981 | 0.3986376789999966 | F | F | F |
| 0.1114318609999998 | 0.5689321970000023 | 0.3988024339999967 | F | F | F |
| 0.5634797049999989 | 0.0941582849999989 | 0.3893470450000009 | F | F | F |
| 0.5641186730000030 | 0.5925506089999999 | 0.3888098850000006 | F | F | F |
| 0.1114494420000014 | 0.0701311669999996 | 0.3986376789999966 | F | F | F |
| 0.3261319590000014 | 0.1051290999999992 | 0.3988024339999967 | F | F | F |
| 0.3492093770000011 | 0.5573703139999964 | 0.3893470450000009 | F | F | F |
| 0.8488609910000022 | 0.5573744860000005 | 0.3888098850000006 | F | F | F |
| 0.8248676340000003 | 0.1057902270000000 | 0.3986376789999966 | F | F | F |
| 0.3383793029999964 | 0.8302004350000018 | 0.3937513699999968 | F | F | F |
| 0.8367797049999979 | 0.3315350439999989 | 0.3937513699999968 | F | F | F |
| 0.7420985669999993 | 0.4866741200000035 | 0.3303952670000001 | F | F | F |
| 0.3376278109999973 | 0.3314195660000010 | 0.3942364460000007 | F | F | F |
| 0.8376410449999980 | 0.8299810290000025 | 0.3937513699999968 | F | F | F |
| 0.7639023445892688 | 0.0036577897800943 | 0.5247706516070749 | T | T | T |
| 0.9107490547539745 | 0.6494717842791353 | 0.4636948715956838 | T | T | T |
| 0.4317843112969845 | 0.6744045433216476 | 0.4566345639586002 | T | T | T |
| 0.9322488391641918 | 0.1763560158771794 | 0.4569976978431151 | T | T | T |
| 0.4077355209495507 | 0.1536425738196650 | 0.4664974279619952 | T | T | T |

|                    |                    |                    |   |   |   |
|--------------------|--------------------|--------------------|---|---|---|
| 0.2456387139909416 | 0.7480747580270791 | 0.5244282288080450 | T | T | T |
| 0.4444466511160091 | 0.9038117159521831 | 0.4656975976014177 | T | T | T |
| 0.9025603464232995 | 0.4234075400919611 | 0.4565912087391916 | T | T | T |
| 0.7669346818214848 | 0.2504724054092917 | 0.5335601070440286 | T | T | T |
| 0.8989940078582322 | 0.9257813675328462 | 0.4567899303413052 | T | T | T |
| 0.4466175903968347 | 0.4009698830437917 | 0.4665038578487097 | T | T | T |
| 0.2262016412207721 | 0.2628118913297789 | 0.5227836685767796 | T | T | T |
| 0.0133926482517549 | 0.2312095589274526 | 0.5266474178064253 | T | T | T |
| 0.6579526149508118 | 0.4394897693233162 | 0.4637216545919193 | T | T | T |
| 0.6829949995310680 | 0.8926447314616035 | 0.4557540883301512 | T | T | T |
| 0.1823828813474573 | 0.8901685075700277 | 0.4563244008059623 | T | T | T |
| 0.1606980515731221 | 0.4386479738315361 | 0.4664926910690749 | T | T | T |
| 0.5216841056681025 | 0.2179506388603908 | 0.5231509839822995 | T | T | T |
| 0.6703348998366431 | 0.6658539395079827 | 0.4599678626239723 | T | T | T |
| 0.0069798245076412 | 0.5028188462607758 | 0.5306189100528368 | T | T | T |
| 0.6740087187166465 | 0.1623588397876973 | 0.4615901382019257 | T | T | T |
| 0.5142178637604606 | 0.4881804422511217 | 0.5306574465313993 | T | T | T |
| 0.1692435376056129 | 0.1645823796073810 | 0.4616685028584129 | T | T | T |
| 0.5165620983926553 | 0.9915607029115406 | 0.5275538271220227 | T | T | T |
| 0.1709474147350480 | 0.6653139128821586 | 0.4614840410821864 | T | T | T |
| 0.2443403289969811 | 0.9814296443392583 | 0.5305705275826519 | T | T | T |
| 0.2715420225233560 | 0.5110089205032953 | 0.5229349348823460 | T | T | T |
| 0.9925449680867453 | 0.7588205862899871 | 0.5342862496474875 | T | T | T |
| 0.2318915720000021 | 0.7582958650000009 | 0.3212997449999975 | F | F | F |
| 0.5035339559999983 | 0.4978031030000025 | 0.3258475270000005 | F | F | F |
| 0.2312494130000005 | 0.2595683819999977 | 0.3212997449999975 | F | F | F |
| 0.5142674240000034 | 0.2262095040000034 | 0.3212997449999975 | F | F | F |
| 0.2649692749999986 | 0.5089321609999971 | 0.3212997449999975 | F | F | F |
| 0.0035676700000025 | 0.9990756250000032 | 0.3258475270000005 | F | F | F |
| 0.7468420193390932 | 0.4899966094503708 | 0.5302083073963874 | T | T | T |
| 0.7752405554896954 | 0.7361450321993823 | 0.5301612683515387 | T | T | T |
| 0.4991801476292760 | 0.7638098070034366 | 0.5325414945591008 | T | T | T |
| 0.0044230089918316 | 0.0028907294606931 | 0.5283677690601168 | T | T | T |
| 0.8197246590000020 | 0.8569508429999999 | 0.3438201640000003 | F | F | F |
| 0.3987081670000023 | 0.9354814869999970 | 0.3117293459999999 | F | F | F |
| 0.9209922539999980 | 0.1532890789999968 | 0.3018949180000021 | F | F | F |
| 0.1730363100000005 | 0.4314418040000021 | 0.3139001839999978 | F | F | F |
| 0.3283148679999996 | 0.8129202289999995 | 0.3438201640000003 | F | F | F |
| 0.6696297120000025 | 0.3927234279999965 | 0.3117293459999999 | F | F | F |
| 0.9299447499999971 | 0.9155171419999988 | 0.3018949180000021 | F | F | F |
| 0.4004008089999971 | 0.1679411770000030 | 0.3139001839999978 | F | F | F |
| 0.8631193249999995 | 0.3221544190000003 | 0.3438201640000003 | F | F | F |
| 0.9417661310000014 | 0.6640191489999978 | 0.3117293459999999 | F | F | F |
| 0.1588438120000006 | 0.9234787780000033 | 0.3018949180000021 | F | F | F |

|                    |                    |                    |   |   |   |
|--------------------|--------------------|--------------------|---|---|---|
| 0.4368057220000026 | 0.3953728259999991 | 0.3139001839999978 | F | F | F |
| 0.1873433459999987 | 0.1386553729999989 | 0.3078748470000008 | F | F | F |
| 0.6083596860000000 | 0.0601247049999998 | 0.3399656449999995 | F | F | F |
| 0.0860756719999998 | 0.8423171000000025 | 0.3498000940000026 | F | F | F |
| 0.8340316199999975 | 0.5641643649999963 | 0.3377948270000033 | F | F | F |
| 0.6787528939999987 | 0.1826860150000016 | 0.3078748470000008 | F | F | F |
| 0.3374381340000028 | 0.6028827789999980 | 0.3399656449999995 | F | F | F |
| 0.0771230949999975 | 0.0800890829999972 | 0.3498000940000026 | F | F | F |
| 0.6066670510000023 | 0.8276650669999981 | 0.3377948270000033 | F | F | F |
| 0.1439485069999975 | 0.6734517499999981 | 0.3078748470000008 | F | F | F |
| 0.0653017340000019 | 0.3315870200000006 | 0.3399656449999995 | F | F | F |
| 0.8482241079999966 | 0.0721274100000002 | 0.3498000940000026 | F | F | F |
| 0.5702620779999990 | 0.6002333420000028 | 0.3377948270000033 | F | F | F |
| 0.5198188029999997 | 0.4710367289999979 | 0.3758420030000025 | F | F | F |
| 0.9426806099999965 | 0.3924763870000021 | 0.4077528669999992 | F | F | F |
| 0.4180544709999978 | 0.1777170419999976 | 0.4180630740000026 | F | F | F |
| 0.1697175740000034 | 0.8957742600000032 | 0.4059099489999980 | F | F | F |
| 0.0157015099999995 | 0.5134525650000015 | 0.3758420030000025 | F | F | F |
| 0.6712180939999968 | 0.9354948960000016 | 0.4077528669999992 | F | F | F |
| 0.4114658740000010 | 0.4116378180000027 | 0.4180630740000026 | F | F | F |
| 0.9398975889999974 | 0.1628324400000025 | 0.4059099489999980 | F | F | F |
| 0.4767584659999997 | 0.0098831760000024 | 0.3758420030000025 | F | F | F |
| 0.3993614999999977 | 0.6636584279999980 | 0.4077528669999992 | F | F | F |
| 0.1841461659999979 | 0.4047562530000022 | 0.4180630740000026 | F | F | F |
| 0.9035842740000035 | 0.9330345110000025 | 0.4059099489999980 | F | F | F |
| 0.1547643999999977 | 0.1916458330000026 | 0.4119880140000021 | F | F | F |
| 0.7307997249999971 | 0.2707766190000029 | 0.3797524499999980 | F | F | F |
| 0.2566607179999991 | 0.4851340860000022 | 0.3698926240000020 | F | F | F |
| 0.5066994279999975 | 0.7643982149999999 | 0.3817393400000029 | F | F | F |
| 0.6603693220000011 | 0.1487234940000022 | 0.4119880140000021 | F | F | F |
| 0.0053115979999987 | 0.7243880719999964 | 0.3797524499999980 | F | F | F |
| 0.2643070809999983 | 0.2506682470000001 | 0.3698926240000020 | F | F | F |
| 0.7342340009999972 | 0.4998948420000033 | 0.3817393400000029 | F | F | F |
| 0.1983331229999976 | 0.6537793850000000 | 0.4119880140000021 | F | F | F |
| 0.2762958710000021 | 0.9991835909999978 | 0.3797524499999980 | F | F | F |
| 0.4911154050000022 | 0.2586069589999980 | 0.3698926240000020 | F | F | F |
| 0.7714716719999970 | 0.7274976870000032 | 0.3817393400000029 | F | F | F |
| 0.8219838497958203 | 0.8445958751302698 | 0.5440728611377511 | T | T | T |
| 0.8547938508991844 | 0.8032427875705989 | 0.4433921181265539 | T | T | T |
| 0.2762760762199901 | 0.7264051090613424 | 0.4751314930420265 | T | T | T |
| 0.4075694518352529 | 0.9325957817218613 | 0.5161420167985555 | T | T | T |
| 0.7556380500149806 | 0.5137820675245879 | 0.4848328295502471 | T | T | T |
| 0.9218624500897955 | 0.1501501012167348 | 0.5068382299155951 | T | T | T |
| 0.5041194325497450 | 0.2270408381723689 | 0.4735755968723581 | T | T | T |

|                    |                    |                    |   |   |   |
|--------------------|--------------------|--------------------|---|---|---|
| 0.1801035984378570 | 0.4338092945715911 | 0.5187722373375678 | T | T | T |
| 0.3388472121037805 | 0.8121739429599721 | 0.5432723617488133 | T | T | T |
| 0.3487317354629436 | 0.8471135553726178 | 0.4438929476655685 | T | T | T |
| 0.0029587772536299 | 0.2677469969753448 | 0.4763725021315248 | T | T | T |
| 0.6758120282975456 | 0.4010903936945382 | 0.5110029714826982 | T | T | T |
| 0.7395481216996062 | 0.7484929719365973 | 0.4847550696401786 | T | T | T |
| 0.9331237853211755 | 0.9243130554043787 | 0.5079891553020069 | T | T | T |
| 0.2759814475303065 | 0.4964253174099567 | 0.4733087025850323 | T | T | T |
| 0.3974805876576313 | 0.1664980615151523 | 0.5203441540613449 | T | T | T |
| 0.8521946703141736 | 0.3369268589203690 | 0.5447005208143237 | T | T | T |
| 0.8114581544630791 | 0.3420228473275833 | 0.4434323021547925 | T | T | T |
| 0.7363475903231941 | 0.9946646372915438 | 0.4755234900237011 | T | T | T |
| 0.9332736521605267 | 0.6658977058750478 | 0.5111836452910758 | T | T | T |
| 0.5174794281710353 | 0.7373091168762819 | 0.4860754156732159 | T | T | T |
| 0.1505390294070711 | 0.9197220369736970 | 0.5060132916714435 | T | T | T |
| 0.2368420923129121 | 0.2680186550957027 | 0.4733905897614155 | T | T | T |
| 0.4429416901121237 | 0.3860714813657714 | 0.5185748539916193 | T | T | T |
| 0.4875876033070727 | 0.5232955157173826 | 0.4796398930846217 | T | T | T |
| 0.1866739033495363 | 0.1361707919293276 | 0.5115304118526209 | T | T | T |
| 0.6068878598420354 | 0.0620594639891230 | 0.5424357993040503 | T | T | T |
| 0.0679750746329302 | 0.6022075525050524 | 0.4474842992343759 | T | T | T |
| 0.0743309294456310 | 0.8506096910224611 | 0.5551550455136426 | T | T | T |
| 0.5886666429404387 | 0.8199595190029600 | 0.4373747425559015 | T | T | T |
| 0.8266831023212105 | 0.5758911128473659 | 0.5408623834662538 | T | T | T |
| 0.8418565862731944 | 0.0973076962096402 | 0.4496618264795878 | T | T | T |
| 0.9983843006581045 | 0.4786203319408781 | 0.4796366096287081 | T | T | T |
| 0.6890028748033123 | 0.1753932664252486 | 0.5113715916175284 | T | T | T |
| 0.3479619249391827 | 0.5906961736158732 | 0.5421004287710993 | T | T | T |
| 0.3364227263348445 | 0.0604268932581422 | 0.4480067669248570 | T | T | T |
| 0.0752322709697148 | 0.0728378778705210 | 0.5518694848046454 | T | T | T |
| 0.5960119075148885 | 0.5861475401927226 | 0.4373918361479290 | T | T | T |
| 0.6119506964923255 | 0.8180343085625247 | 0.5410755090223578 | T | T | T |
| 0.0673267522017894 | 0.8332208109392901 | 0.4498247078980991 | T | T | T |
| 0.5320078310499464 | 0.9893420567384269 | 0.4784487818847436 | T | T | T |
| 0.1442520301147728 | 0.6796191794040471 | 0.5119419984011490 | T | T | T |
| 0.0696575249334734 | 0.3370491049685350 | 0.5418217268373254 | T | T | T |
| 0.6103688633222809 | 0.3289282307432398 | 0.4476216381475008 | T | T | T |
| 0.8541571297551636 | 0.0762254999333619 | 0.5548622144342854 | T | T | T |
| 0.8249937083157893 | 0.5894727512815843 | 0.4371262601107036 | T | T | T |
| 0.5878027563055644 | 0.5932544948610401 | 0.5417283335118578 | T | T | T |
| 0.1046769872476986 | 0.0603313639662583 | 0.4498436588482785 | T | T | T |
| 0.6197328716147155 | 0.3430467974653386 | 0.5616927702340276 | T | T | T |
| 0.0411668987035486 | 0.6111258448605470 | 0.5619493335447641 | T | T | T |
| 0.2467218250169694 | 0.0173349123513547 | 0.5822655267507456 | T | T | T |

|                    |                    |                    |   |   |   |
|--------------------|--------------------|--------------------|---|---|---|
| 0.8604852820984034 | 0.0664144562919390 | 0.5766733853020359 | T | T | T |
| 0.6261346703558585 | 0.3548078578746707 | 0.5830002798339874 | T | T | T |
| 0.0322675720211248 | 0.6122318368047110 | 0.5836919063638576 | T | T | T |
| 0.0830092892571545 | 0.8547578664897664 | 0.5768459076281401 | T | T | T |
| 0.1687045682953277 | 0.0442309338301983 | 0.5801273776530265 | T | T | T |
| 0.2776024712561709 | 0.9480781254937771 | 0.5917204751991830 | T | T | T |

**4H<sub>2</sub>O+Indium Tin Oxide 111 surface:**

In Sn O H

1.0000000000000000

14.6581649780000003 0.0000000000000000 0.0000000000000000

7.3189798837000000 12.7095312472999993 0.0000000000000000

-0.1539904818000000 0.0117322471000000 44.4205346059000021

In Sn O H

56 8 100 8

Selective dynamics

Direct

|                    |                    |                    |   |   |   |
|--------------------|--------------------|--------------------|---|---|---|
| 0.7601300110000011 | 0.0111199609999986 | 0.3212997449999975 | F | F | F |
| 0.2434165649999969 | 0.9854015660000002 | 0.3303952670000001 | F | F | F |
| 0.7751763210000036 | 0.2373103790000002 | 0.3303952670000001 | F | F | F |
| 0.7758184010000022 | 0.7360378240000003 | 0.3303952670000001 | F | F | F |
| 0.0149432030000014 | 0.2262095230000014 | 0.3212997449999975 | F | F | F |
| 0.9921246899999971 | 0.7693967209999997 | 0.3303952670000001 | F | F | F |
| 0.4928005430000013 | 0.7693967209999997 | 0.3303952670000001 | F | F | F |
| 0.0028580700000020 | 0.4978031030000025 | 0.3258475270000005 | F | F | F |
| 0.5041760359999969 | 0.9965305489999992 | 0.3258475270000005 | F | F | F |
| 0.5754696389999978 | 0.3201690450000001 | 0.3988024339999967 | F | F | F |
| 0.1000335600000000 | 0.3427603160000032 | 0.3893470450000009 | F | F | F |
| 0.5996578370000023 | 0.8418218679999967 | 0.3888098850000006 | F | F | F |
| 0.0767109720000008 | 0.8183099729999981 | 0.3986376789999966 | F | F | F |
| 0.1114318609999998 | 0.5689321970000023 | 0.3988024339999967 | F | F | F |
| 0.5634797049999989 | 0.0941582849999989 | 0.3893470450000009 | F | F | F |
| 0.5641186730000030 | 0.5925506089999999 | 0.3888098850000006 | F | F | F |
| 0.1114494420000014 | 0.0701311669999996 | 0.3986376789999966 | F | F | F |
| 0.3261319590000014 | 0.1051290999999992 | 0.3988024339999967 | F | F | F |
| 0.3492093770000011 | 0.5573703139999964 | 0.3893470450000009 | F | F | F |
| 0.8488609910000022 | 0.5573744860000005 | 0.3888098850000006 | F | F | F |
| 0.8248676340000003 | 0.1057902270000000 | 0.3986376789999966 | F | F | F |
| 0.3383793029999964 | 0.8302004350000018 | 0.3937513699999968 | F | F | F |
| 0.8367797049999979 | 0.3315350439999989 | 0.3937513699999968 | F | F | F |
| 0.7420985669999993 | 0.4866741200000035 | 0.3303952670000001 | F | F | F |
| 0.3376278109999973 | 0.3314195660000010 | 0.3942364460000007 | F | F | F |

|                     |                    |                    |   |   |   |
|---------------------|--------------------|--------------------|---|---|---|
| 0.8376410449999980  | 0.8299810290000025 | 0.3937513699999968 | F | F | F |
| 0.7684703366402443  | 0.0007163565052908 | 0.5253491544458747 | T | T | T |
| 0.9114664262176225  | 0.6487323985436337 | 0.4633747583523468 | T | T | T |
| 0.43090659304440823 | 0.6776487420031312 | 0.4558275236538868 | T | T | T |
| 0.9337586153111300  | 0.1749526482199633 | 0.4567244757897084 | T | T | T |
| 0.4085830384595559  | 0.1549650845294073 | 0.4666209413000390 | T | T | T |
| 0.2402934570963801  | 0.7532877950242860 | 0.5243201238716987 | T | T | T |
| 0.4447679682864390  | 0.9050965374245235 | 0.4653115083238150 | T | T | T |
| 0.9024546564472261  | 0.4226687405061789 | 0.4567100027230573 | T | T | T |
| 0.7740176128896215  | 0.2506845295840101 | 0.5299765508756500 | T | T | T |
| 0.8994867679436432  | 0.9252591795596061 | 0.4567265575159689 | T | T | T |
| 0.4466645671200992  | 0.3998784849155441 | 0.4665253085363470 | T | T | T |
| 0.2283248614569013  | 0.2631137689312404 | 0.5231295619400264 | T | T | T |
| 0.0171036960738702  | 0.2305635990260932 | 0.5263549065939624 | T | T | T |
| 0.6580059002055701  | 0.4393724543131747 | 0.4648194331546654 | T | T | T |
| 0.6834936943899177  | 0.8930298427010843 | 0.4557222418665604 | T | T | T |
| 0.1818286179527899  | 0.8905774921013041 | 0.4562350981341229 | T | T | T |
| 0.1610815456608299  | 0.4387141543615389 | 0.4663807631833222 | T | T | T |
| 0.5229142197117015  | 0.2209441594238130 | 0.5251151619664508 | T | T | T |
| 0.6703568847815546  | 0.6655265537207982 | 0.4598241188823842 | T | T | T |
| 0.0084931405310913  | 0.5030721210567628 | 0.5305663348030548 | T | T | T |
| 0.6741253354171619  | 0.1617117432389967 | 0.4619531068128532 | T | T | T |
| 0.4981500503707628  | 0.5122115932326707 | 0.5271296433900668 | T | T | T |
| 0.1701534381098806  | 0.1649198527970929 | 0.4615779130507533 | T | T | T |
| 0.5172878905116124  | 0.9926537147989234 | 0.5272314226663114 | T | T | T |
| 0.1718436637101731  | 0.6654196718548105 | 0.4611652837272915 | T | T | T |
| 0.2432633027735991  | 0.9827271136318327 | 0.5307974041467134 | T | T | T |
| 0.2704470663990187  | 0.5126246290259060 | 0.5229337066224334 | T | T | T |
| 0.9931928337662996  | 0.7584267858120373 | 0.5332973224456258 | T | T | T |
| 0.2318915720000021  | 0.7582958650000009 | 0.3212997449999975 | F | F | F |
| 0.5035339559999983  | 0.4978031030000025 | 0.3258475270000005 | F | F | F |
| 0.2312494130000005  | 0.2595683819999977 | 0.3212997449999975 | F | F | F |
| 0.5142674240000034  | 0.2262095040000034 | 0.3212997449999975 | F | F | F |
| 0.2649692749999986  | 0.5089321609999971 | 0.3212997449999975 | F | F | F |
| 0.0035676700000025  | 0.9990756250000032 | 0.3258475270000005 | F | F | F |
| 0.7451000255285073  | 0.4952045866124838 | 0.5313781176958858 | T | T | T |
| 0.7755073395878087  | 0.7365137009754426 | 0.5297860799616292 | T | T | T |
| 0.4969700145314243  | 0.7691821124032460 | 0.5317379622219919 | T | T | T |
| 0.0041117967059642  | 0.9994642068569712 | 0.5293295588410299 | T | T | T |
| 0.8197246590000020  | 0.8569508429999999 | 0.3438201640000003 | F | F | F |
| 0.3987081670000023  | 0.9354814869999970 | 0.3117293459999999 | F | F | F |
| 0.9209922539999980  | 0.1532890789999968 | 0.3018949180000021 | F | F | F |
| 0.1730363100000005  | 0.4314418040000021 | 0.3139001839999978 | F | F | F |
| 0.3283148679999996  | 0.8129202289999995 | 0.3438201640000003 | F | F | F |



|                    |                    |                    |   |   |   |
|--------------------|--------------------|--------------------|---|---|---|
| 0.6696297120000025 | 0.3927234279999965 | 0.3117293459999999 | F | F | F |
| 0.9299447499999971 | 0.9155171419999988 | 0.3018949180000021 | F | F | F |
| 0.4004008089999971 | 0.1679411770000030 | 0.3139001839999978 | F | F | F |
| 0.8631193249999995 | 0.3221544190000003 | 0.3438201640000003 | F | F | F |
| 0.9417661310000014 | 0.6640191489999978 | 0.3117293459999999 | F | F | F |
| 0.1588438120000006 | 0.9234787780000033 | 0.3018949180000021 | F | F | F |
| 0.4368057220000026 | 0.3953728259999991 | 0.3139001839999978 | F | F | F |
| 0.1873433459999987 | 0.1386553729999989 | 0.3078748470000008 | F | F | F |
| 0.6083596860000000 | 0.0601247049999998 | 0.3399656449999995 | F | F | F |
| 0.0860756719999998 | 0.8423171000000025 | 0.3498000940000026 | F | F | F |
| 0.8340316199999975 | 0.5641643649999963 | 0.3377948270000033 | F | F | F |
| 0.6787528939999987 | 0.1826860150000016 | 0.3078748470000008 | F | F | F |
| 0.3374381340000028 | 0.6028827789999980 | 0.3399656449999995 | F | F | F |
| 0.0771230949999975 | 0.0800890829999972 | 0.3498000940000026 | F | F | F |
| 0.6066670510000023 | 0.8276650669999981 | 0.3377948270000033 | F | F | F |
| 0.1439485069999975 | 0.6734517499999981 | 0.3078748470000008 | F | F | F |
| 0.0653017340000019 | 0.3315870200000006 | 0.3399656449999995 | F | F | F |
| 0.8482241079999966 | 0.0721274100000002 | 0.3498000940000026 | F | F | F |
| 0.5702620779999990 | 0.6002333420000028 | 0.3377948270000033 | F | F | F |
| 0.5198188029999997 | 0.4710367289999979 | 0.3758420030000025 | F | F | F |
| 0.9426806099999965 | 0.3924763870000021 | 0.4077528669999992 | F | F | F |
| 0.4180544709999978 | 0.1777170419999976 | 0.4180630740000026 | F | F | F |
| 0.1697175740000034 | 0.8957742600000032 | 0.4059099489999980 | F | F | F |
| 0.0157015099999995 | 0.5134525650000015 | 0.3758420030000025 | F | F | F |
| 0.6712180939999968 | 0.9354948960000016 | 0.4077528669999992 | F | F | F |
| 0.4114658740000010 | 0.4116378180000027 | 0.4180630740000026 | F | F | F |
| 0.9398975889999974 | 0.1628324400000025 | 0.4059099489999980 | F | F | F |
| 0.4767584659999997 | 0.0098831760000024 | 0.3758420030000025 | F | F | F |
| 0.3993614999999977 | 0.6636584279999980 | 0.4077528669999992 | F | F | F |
| 0.1841461659999979 | 0.4047562530000022 | 0.4180630740000026 | F | F | F |
| 0.9035842740000035 | 0.9330345110000025 | 0.4059099489999980 | F | F | F |
| 0.1547643999999977 | 0.1916458330000026 | 0.4119880140000021 | F | F | F |
| 0.7307997249999971 | 0.2707766190000029 | 0.3797524499999980 | F | F | F |
| 0.2566607179999991 | 0.4851340860000022 | 0.3698926240000020 | F | F | F |
| 0.5066994279999975 | 0.7643982149999999 | 0.3817393400000029 | F | F | F |
| 0.6603693220000011 | 0.1487234940000022 | 0.4119880140000021 | F | F | F |
| 0.0053115979999987 | 0.7243880719999964 | 0.3797524499999980 | F | F | F |
| 0.2643070809999983 | 0.2506682470000001 | 0.3698926240000020 | F | F | F |
| 0.7342340009999972 | 0.4998948420000033 | 0.3817393400000029 | F | F | F |
| 0.1983331229999976 | 0.6537793850000000 | 0.4119880140000021 | F | F | F |
| 0.2762958710000021 | 0.9991835909999978 | 0.3797524499999980 | F | F | F |
| 0.4911154050000022 | 0.2586069589999980 | 0.3698926240000020 | F | F | F |
| 0.7714716719999970 | 0.7274976870000032 | 0.3817393400000029 | F | F | F |
| 0.8229978862903995 | 0.8411622369680691 | 0.5440625588482366 | T | T | T |

|                    |                    |                    |   |   |   |
|--------------------|--------------------|--------------------|---|---|---|
| 0.8549124345483585 | 0.8029137906760323 | 0.4434417180039532 | T | T | T |
| 0.2767304801394349 | 0.7273601014694256 | 0.4751936064328155 | T | T | T |
| 0.4074805516809955 | 0.9346682582795034 | 0.5161044876939727 | T | T | T |
| 0.7529738495737354 | 0.5129019213800599 | 0.4854826686113723 | T | T | T |
| 0.9244909495333411 | 0.1464494517564605 | 0.5068124239128949 | T | T | T |
| 0.5046328883514349 | 0.2277763269301793 | 0.4747173712172394 | T | T | T |
| 0.1809763621544141 | 0.4341417566088566 | 0.5186603579916135 | T | T | T |
| 0.3395091416305491 | 0.8134365707221431 | 0.5426054934431902 | T | T | T |
| 0.3483063768183371 | 0.8487843435383640 | 0.4437988912246478 | T | T | T |
| 0.0042725091158705 | 0.2665250061708344 | 0.4762236948025630 | T | T | T |
| 0.6639002750075770 | 0.4078407953084038 | 0.5147893954141910 | T | T | T |
| 0.7390881476607900 | 0.7484158772388241 | 0.4846764970072923 | T | T | T |
| 0.9374116083461335 | 0.9177232159823367 | 0.5069170780204026 | T | T | T |
| 0.2767057955822552 | 0.4961809685177419 | 0.4733520016796860 | T | T | T |
| 0.3994833647627055 | 0.1686585802483219 | 0.5214880302601144 | T | T | T |
| 0.8554406787107641 | 0.3397363653521392 | 0.5415944311145081 | T | T | T |
| 0.8111543394069759 | 0.3414070711067028 | 0.4441155942563358 | T | T | T |
| 0.7373208257970044 | 0.9944246711029071 | 0.4758657414165927 | T | T | T |
| 0.9336991938634062 | 0.6652191938583037 | 0.5107399596370873 | T | T | T |
| 0.5169652176464197 | 0.7385026555580567 | 0.4858216766794082 | T | T | T |
| 0.1498658749185102 | 0.9206671115944550 | 0.5060148867135521 | T | T | T |
| 0.2378279129777108 | 0.2683562699256870 | 0.4737151056280998 | T | T | T |
| 0.4451764676292002 | 0.3918596476104076 | 0.5188704551303432 | T | T | T |
| 0.4850313880520484 | 0.5266317193351759 | 0.4780513591210054 | T | T | T |
| 0.1886045337015591 | 0.1363979930965981 | 0.5115132464624489 | T | T | T |
| 0.6110380076848203 | 0.0569510768154145 | 0.5420786093336052 | T | T | T |
| 0.0685825946288286 | 0.6020082273188451 | 0.4474646518877883 | T | T | T |
| 0.0827913730454157 | 0.8428175026677980 | 0.5541374418557148 | T | T | T |
| 0.5891300108239467 | 0.8200557748722895 | 0.4374659371481634 | T | T | T |
| 0.8276796388595276 | 0.5787743825534689 | 0.5416480180114641 | T | T | T |
| 0.8418143214869213 | 0.0974826650605415 | 0.4497864403985958 | T | T | T |
| 0.9987072101539147 | 0.4777623183988567 | 0.4795428525121094 | T | T | T |
| 0.6905412649090793 | 0.1752482982393337 | 0.5119245469085163 | T | T | T |
| 0.3394703180902279 | 0.5984701317488993 | 0.5432430809975910 | T | T | T |
| 0.3368446283639734 | 0.0615335417043525 | 0.4482593960185682 | T | T | T |
| 0.0756904749940741 | 0.0727115462794852 | 0.5516273172283066 | T | T | T |
| 0.5968144865881324 | 0.5850603274653614 | 0.4376008808487422 | T | T | T |
| 0.6113267508947866 | 0.8185426753531696 | 0.5407219282148026 | T | T | T |
| 0.0678841034487787 | 0.8331312399063807 | 0.4495622480286710 | T | T | T |
| 0.5320849267371212 | 0.9905427524611247 | 0.4783141423869540 | T | T | T |
| 0.1444429215461754 | 0.6791981889842473 | 0.5108509146662269 | T | T | T |
| 0.0720696010027887 | 0.3370459378327023 | 0.5420435637273776 | T | T | T |
| 0.6107216159367488 | 0.3289371857638203 | 0.4482503935708786 | T | T | T |
| 0.8716263478777240 | 0.0356089387567448 | 0.5565908193432045 | T | T | T |

|                    |                    |                    |   |   |   |
|--------------------|--------------------|--------------------|---|---|---|
| 0.8249333650855648 | 0.5887667488388242 | 0.4373233649108451 | T | T | T |
| 0.5816843528988108 | 0.6031930832355233 | 0.5416446178284092 | T | T | T |
| 0.1055990524830780 | 0.0601829647641693 | 0.4499152828821764 | T | T | T |
| 0.7356187868931878 | 0.2318981306787589 | 0.5755769736025069 | T | T | T |
| 0.0454519678662461 | 0.6116210958498152 | 0.5613109804627696 | T | T | T |
| 0.5534510473017930 | 0.2363966281748108 | 0.5759019938504388 | T | T | T |
| 0.2450007465621348 | 0.0251803137930452 | 0.5820606944198286 | T | T | T |
| 0.8349554255841907 | 0.0993222579932133 | 0.5696868416536466 | T | T | T |
| 0.7520789434038403 | 0.2734081296308882 | 0.5893673955547615 | T | T | T |
| 0.0339622351689144 | 0.6151672536633219 | 0.5829709672664997 | T | T | T |
| 0.6206464290708721 | 0.2412499504841999 | 0.5775414767111801 | T | T | T |
| 0.5785345998975657 | 0.1609962175780945 | 0.5789190880991295 | T | T | T |
| 0.0853330269817293 | 0.8493779907134257 | 0.5759732239864370 | T | T | T |
| 0.1672961020087476 | 0.0501438099249227 | 0.5801077309523482 | T | T | T |
| 0.2763226846314867 | 0.9603419410113392 | 0.5938247465294078 | T | T | T |

---

**Pt-SA on Indium Oxide 111 slab :**

**Site 1 :**

In O Pt

1.0000000000000000

14.6383517878741038 0.0000000000000000 0.0000000000000000

7.3191758939370519 12.6771845178323304 0.0000000000000000

0.0000000000000000 0.0000000000000000 51.0694492725965290

In O Pt

64 96 1

Selective dynamics

Direct

0.7611480013333320 0.0111480013333320 0.4668317439885570 F F F

0.2388520043333315 0.9888520043333315 0.4746588917436156 F F F

0.7388519966666678 0.4888520196666661 0.4746588944350378 F F F

0.2611479936666683 0.5111480166666666 0.4668317466799934 F F F

0.2277039973333359 0.7611480013333320 0.4668317439885570 F F F

0.7722959913333298 0.2388520043333315 0.4746588917436156 F F F

0.7722959836666661 0.7388519966666678 0.4746588944350378 F F F

0.2277039896666651 0.2611479936666683 0.4668317466799934 F F F

0.0111480013333320 0.2277039973333359 0.4668317439885570 F F F

0.9888520043333315 0.7722959913333369 0.4746588917436156 F F F

0.4888520196666661 0.7722959836666661 0.4746588944350378 F F F

0.5111480166666666 0.2277039896666651 0.4668317466799934 F F F

0.0000000000000000 0.0000000000000000 0.4707453188607431 F F F

|                    |                    |                    |   |   |   |
|--------------------|--------------------|--------------------|---|---|---|
| 0.9999999846666654 | 0.5000000076666637 | 0.4707453242436088 | F | F | F |
| 0.5000000076666637 | 0.5000000076666637 | 0.4707453242436088 | F | F | F |
| 0.5000000076666637 | 0.9999999846666654 | 0.4707453242436088 | F | F | F |
| 0.5714614760499686 | 0.3220635869978707 | 0.5335266216303154 | F | F | F |
| 0.0954565668243177 | 0.3446929456050469 | 0.5253897752549719 | F | F | F |
| 0.5951195294231795 | 0.8450268277640021 | 0.5249275287208306 | F | F | F |
| 0.0713873525637467 | 0.8214752461005688 | 0.5333848297685080 | F | F | F |
| 0.1064749369521607 | 0.5714614760499686 | 0.5335266216303154 | F | F | F |
| 0.5598504875706354 | 0.0954565668243177 | 0.5253897752549719 | F | F | F |
| 0.5598536428128256 | 0.5951195294231795 | 0.5249275287208306 | F | F | F |
| 0.1071374013356774 | 0.0713873525637467 | 0.5333848297685080 | F | F | F |
| 0.3220635869978707 | 0.1064749369521607 | 0.5335266216303154 | F | F | F |
| 0.3446929456050469 | 0.5598504875706354 | 0.5253897752549719 | F | F | F |
| 0.8450268277640021 | 0.5598536428128256 | 0.5249275287208306 | F | F | F |
| 0.8214752461005688 | 0.1071374013356774 | 0.5333848297685080 | F | F | F |
| 0.3333333333333357 | 0.3333333333333357 | 0.5295973615149521 | F | F | F |
| 0.3334481086611234 | 0.8333859062698394 | 0.5291799365853791 | F | F | F |
| 0.8333859062698394 | 0.8331659850690301 | 0.5291799365853791 | F | F | F |
| 0.8331659850690301 | 0.3334481086611234 | 0.5291799365853791 | F | F | F |
| 0.7626379972396837 | 0.0113183271241107 | 0.6446995712689224 | T | T | T |
| 0.9061287112129606 | 0.6539323669587855 | 0.5920785052139937 | T | T | T |
| 0.4256040701084874 | 0.6778278917832814 | 0.5832730944598655 | T | T | T |
| 0.2228844742448002 | 0.9926944633392432 | 0.6479519179936868 | T | T | T |
| 0.7531300495510946 | 0.4818375313733190 | 0.6513929752800744 | T | T | T |
| 0.9301263011081387 | 0.1774885336396966 | 0.5837420211456767 | T | T | T |
| 0.4034140827842384 | 0.1539872563055177 | 0.5921082173187148 | T | T | T |
| 0.2700420646870269 | 0.5137482437617774 | 0.6405935226983008 | T | T | T |
| 0.2185265817802941 | 0.7639483058342321 | 0.6443435161033690 | T | T | T |
| 0.4388451107825219 | 0.9060257866532755 | 0.5912754704546104 | T | T | T |
| 0.8937703036262709 | 0.4273842497753450 | 0.5836297314091791 | T | T | T |
| 0.7815119464306247 | 0.2334818612084372 | 0.6479985061649839 | T | T | T |
| 0.7795748973059109 | 0.7358006849826083 | 0.6506326440793688 | T | T | T |
| 0.8916293236434116 | 0.9305872756750584 | 0.5837198741781474 | T | T | T |
| 0.4442384832562811 | 0.4024058297183776 | 0.5920240976285281 | T | T | T |
| 0.2222032995632633 | 0.2645284331414163 | 0.6406502175430032 | T | T | T |
| 0.0112051529939146 | 0.2275732205498290 | 0.6443650024785388 | T | T | T |
| 0.6559284198842804 | 0.4396918141395458 | 0.5924854230409938 | T | T | T |
| 0.6800008221327943 | 0.8925481833968182 | 0.5837473554262635 | T | T | T |
| 0.9843793744378172 | 0.7818659200581777 | 0.6477321422672567 | T | T | T |
| 0.4514488652901837 | 0.7866302466474905 | 0.6476765394274483 | T | T | T |
| 0.1758751159996289 | 0.8930426676984178 | 0.5836206923720909 | T | T | T |
| 0.1573934009776011 | 0.4417952469634360 | 0.5918507352071211 | T | T | T |
| 0.5148401863701042 | 0.2182590521689610 | 0.6406652518434371 | T | T | T |
| 0.9968944582800462 | 0.0015633557386727 | 0.6504075351175649 | T | T | T |

|                    |                    |                    |   |   |   |
|--------------------|--------------------|--------------------|---|---|---|
| 0.6664998238399238 | 0.6661927390155847 | 0.5884237992026249 | T | T | T |
| 0.0001132747199963 | 0.4938382176632998 | 0.6453771582953937 | T | T | T |
| 0.6681619882629968 | 0.1640196564704939 | 0.5877610096129062 | T | T | T |
| 0.5031180020734194 | 0.5043986677235516 | 0.6472677943699361 | T | T | T |
| 0.1632890409820706 | 0.1692076842684087 | 0.5875156586516802 | T | T | T |
| 0.5142976437020943 | 0.9887173000556098 | 0.6465540664628920 | T | T | T |
| 0.1678295482435377 | 0.6678763810845323 | 0.5876946171552465 | T | T | T |
| 0.8159583373333348 | 0.860101333333327  | 0.4862116819395084 | F | F | F |
| 0.3946230123333336 | 0.9387660083333316 | 0.4585959608606061 | F | F | F |
| 0.9187303516666674 | 0.1545573616666687 | 0.4501329301675625 | F | F | F |
| 0.1692716669999967 | 0.4334446800000009 | 0.4604640541843779 | F | F | F |
| 0.3239403293333325 | 0.8159583373333348 | 0.4862116819395084 | F | F | F |
| 0.6666109793333348 | 0.3946230123333336 | 0.4585959608606061 | F | F | F |
| 0.9267122866666639 | 0.9187303516666674 | 0.4501329301675625 | F | F | F |
| 0.3972836530000023 | 0.1692716669999967 | 0.4604640541843779 | F | F | F |
| 0.860101333333327  | 0.3239403293333325 | 0.4862116819395084 | F | F | F |
| 0.9387660083333316 | 0.6666109793333348 | 0.4585959608606061 | F | F | F |
| 0.1545573616666687 | 0.9267122866666639 | 0.4501329301675625 | F | F | F |
| 0.4334446800000009 | 0.3972836530000023 | 0.4604640541843779 | F | F | F |
| 0.1840416783333296 | 0.1398986823333317 | 0.4552789502821071 | F | F | F |
| 0.6053770033333308 | 0.0612340073333328 | 0.4828946713610023 | F | F | F |
| 0.0812696673333306 | 0.8454426573333365 | 0.4913577008838672 | F | F | F |
| 0.8307283486666677 | 0.5665553356666635 | 0.4810265780372305 | F | F | F |
| 0.6760596393333316 | 0.1840416783333367 | 0.4552789502821071 | F | F | F |
| 0.3333889893333364 | 0.6053770033333308 | 0.4828946713610023 | F | F | F |
| 0.0732876753333329 | 0.0812696673333306 | 0.4913577008838672 | F | F | F |
| 0.6027163156666688 | 0.8307283486666677 | 0.4810265780372305 | F | F | F |
| 0.1398986823333317 | 0.6760596393333316 | 0.4552789502821071 | F | F | F |
| 0.0612340073333328 | 0.3333889893333364 | 0.4828946713610023 | F | F | F |
| 0.8454426573333365 | 0.0732876753333329 | 0.4913577008838672 | F | F | F |
| 0.5665553356666635 | 0.6027163156666688 | 0.4810265780372305 | F | F | F |
| 0.5157927795144346 | 0.4732687373369373 | 0.5137680585633078 | F | F | F |
| 0.9389780411721915 | 0.3945739458359014 | 0.5412288865474011 | F | F | F |
| 0.4138055884135099 | 0.1792879430058036 | 0.5501013560831254 | F | F | F |
| 0.1643402231079705 | 0.8991522013241848 | 0.5396430093322451 | F | F | F |
| 0.0109384831486281 | 0.5157927795144346 | 0.5137680585633078 | F | F | F |
| 0.6664480129919070 | 0.9389780411721915 | 0.5412288865474011 | F | F | F |
| 0.4069064685806794 | 0.4138055884135099 | 0.5501013560831254 | F | F | F |
| 0.9365075755678447 | 0.1643402231079705 | 0.5396430093322451 | F | F | F |
| 0.4732687373369373 | 0.0109384831486281 | 0.5137680585633078 | F | F | F |
| 0.3945739458359014 | 0.6664480129919070 | 0.5412288865474011 | F | F | F |
| 0.1792879430058036 | 0.4069064685806794 | 0.5501013560831254 | F | F | F |
| 0.8991522013241848 | 0.9365075755678447 | 0.5396430093322451 | F | F | F |
| 0.1502078384511734 | 0.1932397001298156 | 0.5448734685138632 | F | F | F |

|                    |                     |                    |   |   |   |
|--------------------|---------------------|--------------------|---|---|---|
| 0.7272745789267816 | 0.2725057257219632  | 0.5171331615441943 | F | F | F |
| 0.2523256400471894 | 0.4873897408432910  | 0.5086482917388153 | F | F | F |
| 0.5022127006463535 | 0.7673910184547594  | 0.5188430143373637 | F | F | F |
| 0.6565524614190181 | 0.1502078384511734  | 0.5448734685138632 | F | F | F |
| 0.0002196953512481 | 0.7272745789267816  | 0.5171331615441943 | F | F | F |
| 0.2602846191095196 | 0.2523256400471894  | 0.5086482917388153 | F | F | F |
| 0.7303962808988871 | 0.5022127006463535  | 0.5188430143373637 | F | F | F |
| 0.1932397001298156 | 0.6565524614190181  | 0.5448734685138632 | F | F | F |
| 0.2725057257219632 | 0.0002196953512481  | 0.5171331615441943 | F | F | F |
| 0.4873897408432910 | 0.2602846191095196  | 0.5086482917388153 | F | F | F |
| 0.7673910184547594 | 0.7303962808988871  | 0.5188430143373637 | F | F | F |
| 0.8228809407859963 | 0.8515164244240351  | 0.6607469606058700 | T | T | T |
| 0.8506931091092692 | 0.8045289225340843  | 0.5723965954626040 | T | T | T |
| 0.2725433936954129 | 0.7273481841671045  | 0.6003703834868680 | T | T | T |
| 0.3914245433737497 | 0.9484382753661670  | 0.6358934246952557 | T | T | T |
| 0.7480447197711156 | 0.5126756956956862  | 0.6093327045729602 | T | T | T |
| 0.9251256827486805 | 0.1515653958297731  | 0.6250466309744895 | T | T | T |
| 0.4941726541059036 | 0.2324572164412408  | 0.5980716576797332 | T | T | T |
| 0.1758715439136835 | 0.4373000670295551  | 0.6393661581331878 | T | T | T |
| 0.3041241640530870 | 0.8321691452978615  | 0.6630071677370947 | T | T | T |
| 0.3422868173615446 | 0.8510834534784042  | 0.5722841942213425 | T | T | T |
| 0.9995100961855864 | 0.2740923795371432  | 0.6002111119911895 | T | T | T |
| 0.6639756774322709 | 0.3959440876589799  | 0.6352639727312053 | T | T | T |
| 0.7397312222316812 | 0.7470345756973895  | 0.6091217049513445 | T | T | T |
| 0.9228467627879683 | 0.9267769782573017  | 0.6250298476370183 | T | T | T |
| 0.2751534849810651 | 0.4943264791580072  | 0.5980412803405615 | T | T | T |
| 0.3913873800606707 | 0.1692328590523701  | 0.6395413563295430 | T | T | T |
| 0.8560426195821917 | 0.3228643485477934  | 0.6616911610485083 | T | T | T |
| 0.8052915691111459 | 0.3446710974933293  | 0.5724360469846942 | T | T | T |
| 0.7258110273957232 | -0.0000899880201321 | 0.6001497320353887 | T | T | T |
| 0.9472430604698971 | 0.6593867967612980  | 0.6347304344474410 | T | T | T |
| 0.5065959339865355 | 0.7413994495502173  | 0.6080947659505394 | T | T | T |
| 0.1468260536888180 | 0.9252534279069744  | 0.6248235535183064 | T | T | T |
| 0.2337276596863033 | 0.2724825456510653  | 0.5980137153585664 | T | T | T |
| 0.4413252454784735 | 0.3883704940923512  | 0.6402193541207676 | T | T | T |
| 0.4843241446649901 | 0.5260563392244779  | 0.6042313953449406 | T | T | T |
| 0.1843128154524593 | 0.1409007820894327  | 0.6299172074423197 | T | T | T |
| 0.6000120733566501 | 0.0639926946517639  | 0.6577826901636890 | T | T | T |
| 0.0631370816934642 | 0.6050227166476749  | 0.5762409934383690 | T | T | T |
| 0.0736127773934594 | 0.8407773199322736  | 0.6673459962441290 | T | T | T |
| 0.586385555926469  | 0.8207926376440740  | 0.5673183610077561 | T | T | T |
| 0.8400969099508000 | 0.5665336291330140  | 0.6599271337104767 | T | T | T |
| 0.8349142047106107 | 0.1019572411951531  | 0.5773230431115876 | T | T | T |
| 0.9945507680323344 | 0.4804640497484304  | 0.6027575695694707 | T | T | T |

|                    |                    |                    |   |   |   |
|--------------------|--------------------|--------------------|---|---|---|
| 0.6743963160948616 | 0.1854318830937661 | 0.6303370567084183 | T | T | T |
| 0.3397454172228953 | 0.6006329877869129 | 0.6570577923826072 | T | T | T |
| 0.3323888057415458 | 0.0626257337064607 | 0.5761787135403433 | T | T | T |
| 0.0764335041122253 | 0.0823111912361203 | 0.6674255337946202 | T | T | T |
| 0.5920401350463077 | 0.5862728076965878 | 0.5674072226322588 | T | T | T |
| 0.6186681588114371 | 0.8313001554573902 | 0.6660767588256689 | T | T | T |
| 0.0624811615191199 | 0.8346887648648614 | 0.5773467405481542 | T | T | T |
| 0.5262924832381836 | 0.9886831063216064 | 0.6038430426125336 | T | T | T |
| 0.1406440596675793 | 0.6730740134215256 | 0.6305548148754949 | T | T | T |
| 0.0690622002751047 | 0.3335599163507246 | 0.6578847042974335 | T | T | T |
| 0.6055706514170229 | 0.3326598859114395 | 0.5762661837888050 | T | T | T |
| 0.8377573377540994 | 0.0841665705563163 | 0.6672687714244414 | T | T | T |
| 0.8214919238446361 | 0.5920733778523211 | 0.5673448013649076 | T | T | T |
| 0.6007308157830955 | 0.5616103427921085 | 0.6715259008188037 | T | T | T |
| 0.1018058716480746 | 0.0635573887274117 | 0.5772921643096111 | T | T | T |
| 0.6136035322280414 | 0.6939891358997332 | 0.6725972250613480 | T | T | T |

**Site 2:**

In O Pt

1.0000000000000000

14.6383517878741038 0.0000000000000000 0.0000000000000000

7.3191758939370519 12.6771845178323304 0.0000000000000000

0.0000000000000000 0.0000000000000000 51.0694492725965290

In O Pt

64 96 1

Selective dynamics

Direct

|                    |                    |                    |   |   |   |
|--------------------|--------------------|--------------------|---|---|---|
| 0.7611480013333320 | 0.0111480013333320 | 0.4668317439885570 | F | F | F |
| 0.2388520043333315 | 0.9888520043333315 | 0.4746588917436156 | F | F | F |
| 0.7388519966666678 | 0.4888520196666661 | 0.4746588944350378 | F | F | F |
| 0.2611479936666683 | 0.5111480166666666 | 0.4668317466799934 | F | F | F |
| 0.2277039973333359 | 0.7611480013333320 | 0.4668317439885570 | F | F | F |
| 0.7722959913333298 | 0.2388520043333315 | 0.4746588917436156 | F | F | F |
| 0.7722959836666661 | 0.7388519966666678 | 0.4746588944350378 | F | F | F |
| 0.2277039896666651 | 0.2611479936666683 | 0.4668317466799934 | F | F | F |
| 0.0111480013333320 | 0.2277039973333359 | 0.4668317439885570 | F | F | F |
| 0.9888520043333315 | 0.7722959913333369 | 0.4746588917436156 | F | F | F |
| 0.4888520196666661 | 0.7722959836666661 | 0.4746588944350378 | F | F | F |
| 0.5111480166666666 | 0.2277039896666651 | 0.4668317466799934 | F | F | F |
| 0.0000000000000000 | 0.0000000000000000 | 0.4707453188607431 | F | F | F |
| 0.9999999846666654 | 0.5000000076666637 | 0.4707453242436088 | F | F | F |
| 0.5000000076666637 | 0.5000000076666637 | 0.4707453242436088 | F | F | F |

|                    |                    |                    |   |   |   |
|--------------------|--------------------|--------------------|---|---|---|
| 0.5000000076666637 | 0.9999999846666654 | 0.4707453242436088 | F | F | F |
| 0.5714614760499686 | 0.3220635869978707 | 0.5335266216303154 | F | F | F |
| 0.0954565668243177 | 0.3446929456050469 | 0.5253897752549719 | F | F | F |
| 0.5951195294231795 | 0.8450268277640021 | 0.5249275287208306 | F | F | F |
| 0.0713873525637467 | 0.8214752461005688 | 0.5333848297685080 | F | F | F |
| 0.1064749369521607 | 0.5714614760499686 | 0.5335266216303154 | F | F | F |
| 0.5598504875706354 | 0.0954565668243177 | 0.5253897752549719 | F | F | F |
| 0.5598536428128256 | 0.5951195294231795 | 0.5249275287208306 | F | F | F |
| 0.1071374013356774 | 0.0713873525637467 | 0.5333848297685080 | F | F | F |
| 0.3220635869978707 | 0.1064749369521607 | 0.5335266216303154 | F | F | F |
| 0.3446929456050469 | 0.5598504875706354 | 0.5253897752549719 | F | F | F |
| 0.8450268277640021 | 0.5598536428128256 | 0.5249275287208306 | F | F | F |
| 0.8214752461005688 | 0.1071374013356774 | 0.5333848297685080 | F | F | F |
| 0.3333333333333357 | 0.3333333333333357 | 0.5295973615149521 | F | F | F |
| 0.3334481086611234 | 0.8333859062698394 | 0.5291799365853791 | F | F | F |
| 0.8333859062698394 | 0.8331659850690301 | 0.5291799365853791 | F | F | F |
| 0.8331659850690301 | 0.3334481086611234 | 0.5291799365853791 | F | F | F |
| 0.7633150892315403 | 0.0122314598837639 | 0.6448144951213741 | T | T | T |
| 0.9047924599269944 | 0.6558219078015639 | 0.5922770021827607 | T | T | T |
| 0.4272600671604242 | 0.6797264986589299 | 0.5834837815772084 | T | T | T |
| 0.2359425817702546 | 0.9820417884991154 | 0.6480521801988139 | T | T | T |
| 0.7408828420863347 | 0.4889349303557693 | 0.6501956133605747 | T | T | T |
| 0.9309599561807252 | 0.1768906282880209 | 0.5838481826090232 | T | T | T |
| 0.4028159228490518 | 0.1547787720202747 | 0.5921163474927390 | T | T | T |
| 0.2732839518446841 | 0.5147406060003870 | 0.6425572437074191 | T | T | T |
| 0.2257421547694772 | 0.7627229002145524 | 0.6448960216748788 | T | T | T |
| 0.4400083780943891 | 0.9049202825477325 | 0.5921412300063423 | T | T | T |
| 0.8938471259784970 | 0.4266405924017357 | 0.5834246949255067 | T | T | T |
| 0.7814355417171845 | 0.2346210847664983 | 0.6478667598322793 | T | T | T |
| 0.7683027893945601 | 0.7433921945331655 | 0.6503244759597806 | T | T | T |
| 0.8924908668745422 | 0.9302706617535970 | 0.5839221312064451 | T | T | T |
| 0.4431688122219830 | 0.4017188138094788 | 0.5922322376857867 | T | T | T |
| 0.2237071918201229 | 0.2568383281237311 | 0.6418193791553131 | T | T | T |
| 0.0119646086131961 | 0.2238873635862745 | 0.6447151359793274 | T | T | T |
| 0.6556277098138983 | 0.4395507308888259 | 0.5918422976603879 | T | T | T |
| 0.6799126901104958 | 0.8932792109047133 | 0.5834483122744293 | T | T | T |
| 0.9850151743643627 | 0.7799163029233281 | 0.6478947203363761 | T | T | T |
| 0.4904740803906282 | 0.7693601354456839 | 0.6502982678030198 | T | T | T |
| 0.1773517268126192 | 0.8915140080848067 | 0.5838916733887362 | T | T | T |
| 0.1545045508733355 | 0.4422130361239863 | 0.5914918892479203 | T | T | T |
| 0.5150756429622135 | 0.2195776013630634 | 0.6405258073846775 | T | T | T |
| 0.0003632928445076 | 0.9993230404841604 | 0.6507672109654350 | T | T | T |
| 0.6669656644495341 | 0.6666577744600866 | 0.5873730885662493 | T | T | T |
| 0.9814679750535767 | 0.4977084619645613 | 0.6455034490059288 | T | T | T |



|                    |                    |                    |   |   |   |
|--------------------|--------------------|--------------------|---|---|---|
| 0.6686115685901224 | 0.1637912549612500 | 0.5877796874100324 | T | T | T |
| 0.4995774263044878 | 0.5130182318433473 | 0.6450270269592761 | T | T | T |
| 0.1640635313428349 | 0.1678996894967963 | 0.5878105152223178 | T | T | T |
| 0.5141602613960204 | 0.9903881839783808 | 0.6450586273579172 | T | T | T |
| 0.1689460092906756 | 0.6665288691794746 | 0.5882317438343257 | T | T | T |
| 0.8159583373333348 | 0.8601013333333327 | 0.4862116819395084 | F | F | F |
| 0.3946230123333336 | 0.9387660083333316 | 0.4585959608606061 | F | F | F |
| 0.9187303516666674 | 0.1545573616666687 | 0.4501329301675625 | F | F | F |
| 0.1692716669999967 | 0.4334446800000009 | 0.4604640541843779 | F | F | F |
| 0.3239403293333325 | 0.8159583373333348 | 0.4862116819395084 | F | F | F |
| 0.6666109793333348 | 0.3946230123333336 | 0.4585959608606061 | F | F | F |
| 0.9267122866666639 | 0.9187303516666674 | 0.4501329301675625 | F | F | F |
| 0.3972836530000023 | 0.1692716669999967 | 0.4604640541843779 | F | F | F |
| 0.8601013333333327 | 0.3239403293333325 | 0.4862116819395084 | F | F | F |
| 0.9387660083333316 | 0.6666109793333348 | 0.4585959608606061 | F | F | F |
| 0.1545573616666687 | 0.9267122866666639 | 0.4501329301675625 | F | F | F |
| 0.4334446800000009 | 0.3972836530000023 | 0.4604640541843779 | F | F | F |
| 0.1840416783333296 | 0.1398986823333317 | 0.4552789502821071 | F | F | F |
| 0.6053770033333308 | 0.0612340073333328 | 0.4828946713610023 | F | F | F |
| 0.0812696673333306 | 0.8454426573333365 | 0.4913577008838672 | F | F | F |
| 0.8307283486666677 | 0.5665553356666635 | 0.4810265780372305 | F | F | F |
| 0.6760596393333316 | 0.1840416783333367 | 0.4552789502821071 | F | F | F |
| 0.3333889893333364 | 0.6053770033333308 | 0.4828946713610023 | F | F | F |
| 0.0732876753333329 | 0.0812696673333306 | 0.4913577008838672 | F | F | F |
| 0.6027163156666688 | 0.8307283486666677 | 0.4810265780372305 | F | F | F |
| 0.1398986823333317 | 0.6760596393333316 | 0.4552789502821071 | F | F | F |
| 0.0612340073333328 | 0.3333889893333364 | 0.4828946713610023 | F | F | F |
| 0.8454426573333365 | 0.0732876753333329 | 0.4913577008838672 | F | F | F |
| 0.5665553356666635 | 0.6027163156666688 | 0.4810265780372305 | F | F | F |
| 0.5157927795144346 | 0.4732687373369373 | 0.5137680585633078 | F | F | F |
| 0.9389780411721915 | 0.3945739458359014 | 0.5412288865474011 | F | F | F |
| 0.4138055884135099 | 0.1792879430058036 | 0.5501013560831254 | F | F | F |
| 0.1643402231079705 | 0.8991522013241848 | 0.5396430093322451 | F | F | F |
| 0.0109384831486281 | 0.5157927795144346 | 0.5137680585633078 | F | F | F |
| 0.6664480129919070 | 0.9389780411721915 | 0.5412288865474011 | F | F | F |
| 0.4069064685806794 | 0.4138055884135099 | 0.5501013560831254 | F | F | F |
| 0.9365075755678447 | 0.1643402231079705 | 0.5396430093322451 | F | F | F |
| 0.4732687373369373 | 0.0109384831486281 | 0.5137680585633078 | F | F | F |
| 0.3945739458359014 | 0.6664480129919070 | 0.5412288865474011 | F | F | F |
| 0.1792879430058036 | 0.4069064685806794 | 0.5501013560831254 | F | F | F |
| 0.8991522013241848 | 0.9365075755678447 | 0.5396430093322451 | F | F | F |
| 0.1502078384511734 | 0.1932397001298156 | 0.5448734685138632 | F | F | F |
| 0.7272745789267816 | 0.2725057257219632 | 0.5171331615441943 | F | F | F |
| 0.2523256400471894 | 0.4873897408432910 | 0.5086482917388153 | F | F | F |

|                    |                    |                    |   |   |   |
|--------------------|--------------------|--------------------|---|---|---|
| 0.5022127006463535 | 0.7673910184547594 | 0.5188430143373637 | F | F | F |
| 0.6565524614190181 | 0.1502078384511734 | 0.5448734685138632 | F | F | F |
| 0.0002196953512481 | 0.7272745789267816 | 0.5171331615441943 | F | F | F |
| 0.2602846191095196 | 0.2523256400471894 | 0.5086482917388153 | F | F | F |
| 0.7303962808988871 | 0.5022127006463535 | 0.5188430143373637 | F | F | F |
| 0.1932397001298156 | 0.6565524614190181 | 0.5448734685138632 | F | F | F |
| 0.2725057257219632 | 0.0002196953512481 | 0.5171331615441943 | F | F | F |
| 0.4873897408432910 | 0.2602846191095196 | 0.5086482917388153 | F | F | F |
| 0.7673910184547594 | 0.7303962808988871 | 0.5188430143373637 | F | F | F |
| 0.8202535122015970 | 0.8524553513966755 | 0.6608921204317444 | T | T | T |
| 0.8511620726959184 | 0.8050715805615916 | 0.5722273254022159 | T | T | T |
| 0.2738608690092809 | 0.7260101817048877 | 0.6000078040472737 | T | T | T |
| 0.3983332299860955 | 0.9410782061639862 | 0.6353810122233420 | T | T | T |
| 0.7486814937483339 | 0.5124229321294247 | 0.6081227612601556 | T | T | T |
| 0.9267273283189952 | 0.1500226969015250 | 0.6253372198968898 | T | T | T |
| 0.4951897960211654 | 0.2316335601944707 | 0.5978677608844372 | T | T | T |
| 0.1504694609118845 | 0.4579994413987721 | 0.6404124527696908 | T | T | T |
| 0.3297600951682779 | 0.8185759193179084 | 0.6608199026861744 | T | T | T |
| 0.3438731692277146 | 0.8510959662845853 | 0.5722718587616524 | T | T | T |
| 0.0002943122515495 | 0.2730615115567459 | 0.6000270189934389 | T | T | T |
| 0.6623729443064342 | 0.3973537041255255 | 0.6350346224230771 | T | T | T |
| 0.7390826907945792 | 0.7479547199186465 | 0.6082601836444884 | T | T | T |
| 0.9235673731107815 | 0.9256773808407154 | 0.6254071420140539 | T | T | T |
| 0.2731295813346902 | 0.4908088834765493 | 0.5997010741590119 | T | T | T |
| 0.3947871832123299 | 0.1651161964615253 | 0.6381252714058409 | T | T | T |
| 0.8520932937312512 | 0.3281696317147977 | 0.6607920117125675 | T | T | T |
| 0.8059555377628823 | 0.3432096607971650 | 0.5722360531792232 | T | T | T |
| 0.7270720479300434 | 0.9997117242295368 | 0.6001034251180213 | T | T | T |
| 0.9391078802179926 | 0.6617248265045649 | 0.6353352141169873 | T | T | T |
| 0.5131183111081420 | 0.7393489920213707 | 0.6082586847584101 | T | T | T |
| 0.1511986337364610 | 0.9222643777729582 | 0.6254131906930744 | T | T | T |
| 0.2317923432044132 | 0.2751079860281357 | 0.5993465689501408 | T | T | T |
| 0.4463956294907346 | 0.3893529686754011 | 0.6385726864376473 | T | T | T |
| 0.4827529024756626 | 0.5263470964231167 | 0.6024670629612122 | T | T | T |
| 0.1865066700724850 | 0.1364206565815942 | 0.6301859951590968 | T | T | T |
| 0.6003833784013529 | 0.0649132062124940 | 0.6576779580960316 | T | T | T |
| 0.0628953129908980 | 0.6051140393210386 | 0.5763260795195554 | T | T | T |
| 0.0764478606384793 | 0.8388562701647087 | 0.6673599842567720 | T | T | T |
| 0.5858827821313558 | 0.8214059288495231 | 0.5668376307991442 | T | T | T |
| 0.8217105945016244 | 0.5763643993197018 | 0.6596357133970752 | T | T | T |
| 0.8356399708134289 | 0.1018498356681903 | 0.5773514207556241 | T | T | T |
| 0.9918468711476871 | 0.4823815485085427 | 0.6027695290951188 | T | T | T |
| 0.6761068211351892 | 0.1850340893773162 | 0.6302393166797873 | T | T | T |
| 0.3411967861111700 | 0.6023317125441141 | 0.6580658828107636 | T | T | T |

|                    |                    |                    |   |   |   |
|--------------------|--------------------|--------------------|---|---|---|
| 0.3319205635016348 | 0.0630339542042228 | 0.5762767313865358 | T | T | T |
| 0.0853481157265682 | 0.0755479043987845 | 0.6672465474150482 | T | T | T |
| 0.5930100273491747 | 0.5857690572803924 | 0.5668529206008466 | T | T | T |
| 0.5999077913901764 | 0.8274456001753077 | 0.6593014524140112 | T | T | T |
| 0.0630822967513980 | 0.8339262849135091 | 0.5773870442213697 | T | T | T |
| 0.5271354014410468 | 0.9903685258711584 | 0.6024743657722004 | T | T | T |
| 0.1422862096523097 | 0.6738261782673325 | 0.6308450933382441 | T | T | T |
| 0.0626862658020190 | 0.3348986775444768 | 0.6567701171264164 | T | T | T |
| 0.6056621709067950 | 0.3320696086915690 | 0.5761120533812240 | T | T | T |
| 0.8395454274811835 | 0.0847014591943342 | 0.6672985526759885 | T | T | T |
| 0.8225282292278232 | 0.5924933040385674 | 0.5669052363072005 | T | T | T |
| 0.5753118494850069 | 0.6004192896302678 | 0.6589807183404364 | T | T | T |
| 0.1023487535596321 | 0.0623177622395829 | 0.5773616105336163 | T | T | T |
| 0.2177456036712953 | 0.4059523136930179 | 0.6745881921719977 | T | T | T |

**Site 3:**

In O Pt

1.0000000000000000

|                     |                     |                     |
|---------------------|---------------------|---------------------|
| 14.6383517878741038 | 0.0000000000000000  | 0.0000000000000000  |
| 7.3191758939370519  | 12.6771845178323304 | 0.0000000000000000  |
| 0.0000000000000000  | 0.0000000000000000  | 51.0694492725965290 |

In O Pt

64 96 1

Selective dynamics

Direct

|                    |                    |                    |   |   |   |
|--------------------|--------------------|--------------------|---|---|---|
| 0.7611480013333320 | 0.0111480013333320 | 0.4668317439885570 | F | F | F |
| 0.2388520043333315 | 0.9888520043333315 | 0.4746588917436156 | F | F | F |
| 0.7388519966666678 | 0.4888520196666661 | 0.4746588944350378 | F | F | F |
| 0.2611479936666683 | 0.5111480166666666 | 0.4668317466799934 | F | F | F |
| 0.2277039973333359 | 0.7611480013333320 | 0.4668317439885570 | F | F | F |
| 0.7722959913333298 | 0.2388520043333315 | 0.4746588917436156 | F | F | F |
| 0.7722959836666661 | 0.7388519966666678 | 0.4746588944350378 | F | F | F |
| 0.2277039896666651 | 0.2611479936666683 | 0.4668317466799934 | F | F | F |
| 0.0111480013333320 | 0.2277039973333359 | 0.4668317439885570 | F | F | F |
| 0.9888520043333315 | 0.7722959913333369 | 0.4746588917436156 | F | F | F |
| 0.4888520196666661 | 0.7722959836666661 | 0.4746588944350378 | F | F | F |
| 0.5111480166666666 | 0.2277039896666651 | 0.4668317466799934 | F | F | F |
| 0.0000000000000000 | 0.0000000000000000 | 0.4707453188607431 | F | F | F |
| 0.9999999846666654 | 0.5000000076666637 | 0.4707453242436088 | F | F | F |
| 0.5000000076666637 | 0.5000000076666637 | 0.4707453242436088 | F | F | F |
| 0.5000000076666637 | 0.9999999846666654 | 0.4707453242436088 | F | F | F |
| 0.5714614760499686 | 0.3220635869978707 | 0.5335266216303154 | F | F | F |

|                    |                    |                    |   |   |   |
|--------------------|--------------------|--------------------|---|---|---|
| 0.0954565668243177 | 0.3446929456050469 | 0.5253897752549719 | F | F | F |
| 0.5951195294231795 | 0.8450268277640021 | 0.5249275287208306 | F | F | F |
| 0.0713873525637467 | 0.8214752461005688 | 0.5333848297685080 | F | F | F |
| 0.1064749369521607 | 0.5714614760499686 | 0.5335266216303154 | F | F | F |
| 0.5598504875706354 | 0.0954565668243177 | 0.5253897752549719 | F | F | F |
| 0.5598536428128256 | 0.5951195294231795 | 0.5249275287208306 | F | F | F |
| 0.1071374013356774 | 0.0713873525637467 | 0.5333848297685080 | F | F | F |
| 0.3220635869978707 | 0.1064749369521607 | 0.5335266216303154 | F | F | F |
| 0.3446929456050469 | 0.5598504875706354 | 0.5253897752549719 | F | F | F |
| 0.8450268277640021 | 0.5598536428128256 | 0.5249275287208306 | F | F | F |
| 0.8214752461005688 | 0.1071374013356774 | 0.5333848297685080 | F | F | F |
| 0.3333333333333357 | 0.3333333333333357 | 0.5295973615149521 | F | F | F |
| 0.3334481086611234 | 0.8333859062698394 | 0.5291799365853791 | F | F | F |
| 0.8333859062698394 | 0.8331659850690301 | 0.5291799365853791 | F | F | F |
| 0.8331659850690301 | 0.3334481086611234 | 0.5291799365853791 | F | F | F |
| 0.7606242290461834 | 0.0143912521826949 | 0.6443775678562598 | T | T | T |
| 0.9043053457580984 | 0.6549644482612361 | 0.5919339254411669 | T | T | T |
| 0.4264356992700939 | 0.6793996466942233 | 0.5839406931735879 | T | T | T |
| 0.2385430317310782 | 0.9853196953782078 | 0.6506370017173044 | T | T | T |
| 0.7474226522865494 | 0.4879269320445420 | 0.6505710924875372 | T | T | T |
| 0.9302502279002763 | 0.1778872195707551 | 0.5838021340096591 | T | T | T |
| 0.4022011206079000 | 0.1545524247354911 | 0.5918498294415911 | T | T | T |
| 0.2700528917589829 | 0.5103443913732306 | 0.6416643633978582 | T | T | T |
| 0.2010660776122619 | 0.7728964650050517 | 0.6406544640535679 | T | T | T |
| 0.4393728692844765 | 0.9045746224746908 | 0.5923446677572067 | T | T | T |
| 0.8940595966474487 | 0.4266486718487378 | 0.5835102908391637 | T | T | T |
| 0.7803726095826381 | 0.2362004723097313 | 0.6478289098343631 | T | T | T |
| 0.7698985443493446 | 0.7409644736122293 | 0.6501966711898389 | T | T | T |
| 0.8913144142957270 | 0.9310311788274633 | 0.5837023445113968 | T | T | T |
| 0.4426274095672473 | 0.4021601645007445 | 0.5920981121137752 | T | T | T |
| 0.2198913195115063 | 0.2660964211855100 | 0.6406553763167427 | T | T | T |
| 0.0138757152822613 | 0.2249211846975233 | 0.6447533634180000 | T | T | T |
| 0.6550827082641721 | 0.4400137299876745 | 0.5924893033079613 | T | T | T |
| 0.6791430424151719 | 0.8933738274836734 | 0.5835251951917688 | T | T | T |
| 0.9770295754374747 | 0.7837220771296304 | 0.6478874526931628 | T | T | T |
| 0.4987852237338462 | 0.7682338310693260 | 0.6514477901954322 | T | T | T |
| 0.1773543973815986 | 0.8936888824182861 | 0.5834580108145687 | T | T | T |
| 0.1558997615420668 | 0.4420757114796754 | 0.5920100618639146 | T | T | T |
| 0.5140968156508802 | 0.2194799581493756 | 0.6400272154874396 | T | T | T |
| 0.9958540668903182 | 0.0053595949419586 | 0.6509119884728508 | T | T | T |
| 0.6660305987151751 | 0.6664312519315457 | 0.5875987771664721 | T | T | T |
| 0.9935973689335528 | 0.4966091192087098 | 0.6454021207586497 | T | T | T |
| 0.6678834325829833 | 0.1645180424891366 | 0.5875487965769967 | T | T | T |
| 0.5014679409916439 | 0.5122561584117205 | 0.6463892707957093 | T | T | T |

|                    |                    |                    |   |   |   |
|--------------------|--------------------|--------------------|---|---|---|
| 0.1646068174872344 | 0.1670809393223999 | 0.5880337936375341 | T | T | T |
| 0.5113477621492182 | 0.9927451663073354 | 0.6453634473917385 | T | T | T |
| 0.1666297484820932 | 0.6660867313474652 | 0.5873185255744945 | T | T | T |
| 0.8159583373333348 | 0.8601013333333327 | 0.4862116819395084 | F | F | F |
| 0.3946230123333336 | 0.9387660083333316 | 0.4585959608606061 | F | F | F |
| 0.9187303516666674 | 0.1545573616666687 | 0.4501329301675625 | F | F | F |
| 0.1692716669999967 | 0.4334446800000009 | 0.4604640541843779 | F | F | F |
| 0.3239403293333325 | 0.8159583373333348 | 0.4862116819395084 | F | F | F |
| 0.6666109793333348 | 0.3946230123333336 | 0.4585959608606061 | F | F | F |
| 0.9267122866666639 | 0.9187303516666674 | 0.4501329301675625 | F | F | F |
| 0.3972836530000023 | 0.1692716669999967 | 0.4604640541843779 | F | F | F |
| 0.8601013333333327 | 0.3239403293333325 | 0.4862116819395084 | F | F | F |
| 0.9387660083333316 | 0.6666109793333348 | 0.4585959608606061 | F | F | F |
| 0.1545573616666687 | 0.9267122866666639 | 0.4501329301675625 | F | F | F |
| 0.4334446800000009 | 0.3972836530000023 | 0.4604640541843779 | F | F | F |
| 0.1840416783333296 | 0.1398986823333317 | 0.4552789502821071 | F | F | F |
| 0.6053770033333308 | 0.0612340073333328 | 0.4828946713610023 | F | F | F |
| 0.0812696673333306 | 0.8454426573333365 | 0.4913577008838672 | F | F | F |
| 0.8307283486666677 | 0.5665553356666635 | 0.4810265780372305 | F | F | F |
| 0.6760596393333316 | 0.1840416783333367 | 0.4552789502821071 | F | F | F |
| 0.3333889893333364 | 0.6053770033333308 | 0.4828946713610023 | F | F | F |
| 0.0732876753333329 | 0.0812696673333306 | 0.4913577008838672 | F | F | F |
| 0.6027163156666688 | 0.8307283486666677 | 0.4810265780372305 | F | F | F |
| 0.1398986823333317 | 0.6760596393333316 | 0.4552789502821071 | F | F | F |
| 0.0612340073333328 | 0.3333889893333364 | 0.4828946713610023 | F | F | F |
| 0.8454426573333365 | 0.0732876753333329 | 0.4913577008838672 | F | F | F |
| 0.5665553356666635 | 0.6027163156666688 | 0.4810265780372305 | F | F | F |
| 0.5157927795144346 | 0.4732687373369373 | 0.5137680585633078 | F | F | F |
| 0.9389780411721915 | 0.3945739458359014 | 0.5412288865474011 | F | F | F |
| 0.4138055884135099 | 0.1792879430058036 | 0.5501013560831254 | F | F | F |
| 0.1643402231079705 | 0.8991522013241848 | 0.5396430093322451 | F | F | F |
| 0.0109384831486281 | 0.5157927795144346 | 0.5137680585633078 | F | F | F |
| 0.6664480129919070 | 0.9389780411721915 | 0.5412288865474011 | F | F | F |
| 0.4069064685806794 | 0.4138055884135099 | 0.5501013560831254 | F | F | F |
| 0.9365075755678447 | 0.1643402231079705 | 0.5396430093322451 | F | F | F |
| 0.4732687373369373 | 0.0109384831486281 | 0.5137680585633078 | F | F | F |
| 0.3945739458359014 | 0.6664480129919070 | 0.5412288865474011 | F | F | F |
| 0.1792879430058036 | 0.4069064685806794 | 0.5501013560831254 | F | F | F |
| 0.8991522013241848 | 0.9365075755678447 | 0.5396430093322451 | F | F | F |
| 0.1502078384511734 | 0.1932397001298156 | 0.5448734685138632 | F | F | F |
| 0.7272745789267816 | 0.2725057257219632 | 0.5171331615441943 | F | F | F |
| 0.2523256400471894 | 0.4873897408432910 | 0.5086482917388153 | F | F | F |
| 0.5022127006463535 | 0.7673910184547594 | 0.5188430143373637 | F | F | F |
| 0.6565524614190181 | 0.1502078384511734 | 0.5448734685138632 | F | F | F |

|                     |                    |                    |   |   |   |
|---------------------|--------------------|--------------------|---|---|---|
| 0.0002196953512481  | 0.7272745789267816 | 0.5171331615441943 | F | F | F |
| 0.2602846191095196  | 0.2523256400471894 | 0.5086482917388153 | F | F | F |
| 0.7303962808988871  | 0.5022127006463535 | 0.5188430143373637 | F | F | F |
| 0.1932397001298156  | 0.6565524614190181 | 0.5448734685138632 | F | F | F |
| 0.2725057257219632  | 0.0002196953512481 | 0.5171331615441943 | F | F | F |
| 0.4873897408432910  | 0.2602846191095196 | 0.5086482917388153 | F | F | F |
| 0.7673910184547594  | 0.7303962808988871 | 0.5188430143373637 | F | F | F |
| 0.8147422866679305  | 0.8552478815978540 | 0.6605917816241553 | T | T | T |
| 0.8508492405684219  | 0.8051506738170912 | 0.5723383717884116 | T | T | T |
| 0.2695402109677006  | 0.7272556216256393 | 0.5993791476819149 | T | T | T |
| 0.3974091216555514  | 0.9398002711444131 | 0.6353790670345411 | T | T | T |
| 0.7487068540204315  | 0.5120460188489268 | 0.6083368134910453 | T | T | T |
| 0.9264194331412862  | 0.1512360302379757 | 0.6254457999920575 | T | T | T |
| 0.4951118223548587  | 0.2305985540485227 | 0.5974170997467803 | T | T | T |
| 0.1727393441713640  | 0.4381482834158029 | 0.6395451007558646 | T | T | T |
| 0.3507863781972531  | 0.8390633214190995 | 0.6742280925621035 | T | T | T |
| 0.3437987658748880  | 0.8499063590979764 | 0.5725342501024044 | T | T | T |
| 0.0006980268843999  | 0.2730069312784748 | 0.6002818062457300 | T | T | T |
| 0.6623455472946321  | 0.3975260362674774 | 0.6356236348954271 | T | T | T |
| 0.7394043570068779  | 0.7472191743926413 | 0.6082763228239160 | T | T | T |
| 0.9224864513389431  | 0.9275262107350215 | 0.6250720351399920 | T | T | T |
| 0.2729094735338801  | 0.4954162278302467 | 0.5984682266261983 | T | T | T |
| 0.3895639729191893  | 0.1714022486454639 | 0.6392063273548152 | T | T | T |
| 0.8547840146757608  | 0.3271138801309273 | 0.6607141861849334 | T | T | T |
| 0.8053047051054755  | 0.3439386013226246 | 0.5724274987674981 | T | T | T |
| 0.7258908360249480  | 0.0002505648781500 | 0.6000291818012605 | T | T | T |
| 0.9417210658796572  | 0.6616554889135350 | 0.6350877468595890 | T | T | T |
| 0.5121347174835655  | 0.7400132773098164 | 0.6090806581582030 | T | T | T |
| 0.1568793582748450  | 0.9271968919224612 | 0.6257396599907665 | T | T | T |
| 0.2320901217758514  | 0.2729914892874846 | 0.5979956342868171 | T | T | T |
| 0.4397956678828774  | 0.3885552748459773 | 0.6374637723684389 | T | T | T |
| 0.4804412782049074  | 0.5279760763541723 | 0.6039898878598818 | T | T | T |
| 0.1869477184813715  | 0.1386713612965608 | 0.6311030283981237 | T | T | T |
| 0.5984341638476157  | 0.0662905489058241 | 0.6575223951366517 | T | T | T |
| 0.0617088615067104  | 0.6049906789020225 | 0.5761215919491584 | T | T | T |
| 0.0650876483190607  | 0.8457275056984307 | 0.6667145546057291 | T | T | T |
| 0.5852374148671946  | 0.8214490389181197 | 0.5670545258968316 | T | T | T |
| 0.8305475455751771  | 0.5738406367864217 | 0.6593168513295171 | T | T | T |
| 0.8353382967586264  | 0.1022745441796546 | 0.5773667969189284 | T | T | T |
| -0.0077937275743488 | 0.4822996255946951 | 0.6028341771011148 | T | T | T |
| 0.6744586109763910  | 0.1867418375911229 | 0.6298944473121934 | T | T | T |
| 0.3552852390402694  | 0.5610059658398168 | 0.6687034189331957 | T | T | T |
| 0.3319117699318425  | 0.0619762769027458 | 0.5763082384520154 | T | T | T |
| 0.0841060733208658  | 0.0766653010583576 | 0.6677827135431930 | T | T | T |

|                    |                     |                    |   |   |   |
|--------------------|---------------------|--------------------|---|---|---|
| 0.5907337297047998 | 0.5859302714341351  | 0.5674055222964236 | T | T | T |
| 0.6026196497915138 | 0.8300301643320545  | 0.6591977889786831 | T | T | T |
| 0.0628192788958738 | 0.8356070408054616  | 0.5778704874439010 | T | T | T |
| 0.5256116201664934 | -0.0090313277602134 | 0.6029103519056516 | T | T | T |
| 0.1388353360051820 | 0.6697542235946209  | 0.6308647299090469 | T | T | T |
| 0.0652867431392246 | 0.3361601767161692  | 0.6576335063122623 | T | T | T |
| 0.6046774182773359 | 0.3337626987957794  | 0.5762711810562156 | T | T | T |
| 0.8361070156351517 | 0.0869994367119551  | 0.6672334525685166 | T | T | T |
| 0.8213601842382625 | 0.5922833256988781  | 0.5669828065305472 | T | T | T |
| 0.5843707581690943 | 0.5977864420044371  | 0.6597308212717028 | T | T | T |
| 0.1016111868624830 | 0.0630812713987502  | 0.5774322156586439 | T | T | T |
| 0.3514316892357050 | 0.7018896124890082  | 0.6720320157850006 | T | T | T |

#### Site 4:

In O Pt

1.0000000000000000

14.6383517878741038 0.0000000000000000 0.0000000000000000

7.3191758939370519 12.6771845178323304 0.0000000000000000

0.0000000000000000 0.0000000000000000 51.0694492725965290

In O Pt

64 96 1

Selective dynamics

Direct

|                    |                    |                    |   |   |   |
|--------------------|--------------------|--------------------|---|---|---|
| 0.7611480013333320 | 0.0111480013333320 | 0.4668317439885570 | F | F | F |
| 0.2388520043333315 | 0.9888520043333315 | 0.4746588917436156 | F | F | F |
| 0.7388519966666678 | 0.4888520196666661 | 0.4746588944350378 | F | F | F |
| 0.2611479936666683 | 0.5111480166666666 | 0.4668317466799934 | F | F | F |
| 0.2277039973333359 | 0.7611480013333320 | 0.4668317439885570 | F | F | F |
| 0.7722959913333298 | 0.2388520043333315 | 0.4746588917436156 | F | F | F |
| 0.7722959836666661 | 0.7388519966666678 | 0.4746588944350378 | F | F | F |
| 0.2277039896666651 | 0.2611479936666683 | 0.4668317466799934 | F | F | F |
| 0.0111480013333320 | 0.2277039973333359 | 0.4668317439885570 | F | F | F |
| 0.9888520043333315 | 0.7722959913333369 | 0.4746588917436156 | F | F | F |
| 0.4888520196666661 | 0.7722959836666661 | 0.4746588944350378 | F | F | F |
| 0.5111480166666666 | 0.2277039896666651 | 0.4668317466799934 | F | F | F |
| 0.0000000000000000 | 0.0000000000000000 | 0.4707453188607431 | F | F | F |
| 0.9999999846666654 | 0.5000000076666637 | 0.4707453242436088 | F | F | F |
| 0.5000000076666637 | 0.5000000076666637 | 0.4707453242436088 | F | F | F |
| 0.5000000076666637 | 0.9999999846666654 | 0.4707453242436088 | F | F | F |
| 0.5714614760499686 | 0.3220635869978707 | 0.5335266216303154 | F | F | F |
| 0.0954565668243177 | 0.3446929456050469 | 0.5253897752549719 | F | F | F |
| 0.5951195294231795 | 0.8450268277640021 | 0.5249275287208306 | F | F | F |

|                    |                    |                    |   |   |   |
|--------------------|--------------------|--------------------|---|---|---|
| 0.0713873525637467 | 0.8214752461005688 | 0.5333848297685080 | F | F | F |
| 0.1064749369521607 | 0.5714614760499686 | 0.5335266216303154 | F | F | F |
| 0.5598504875706354 | 0.0954565668243177 | 0.5253897752549719 | F | F | F |
| 0.5598536428128256 | 0.5951195294231795 | 0.5249275287208306 | F | F | F |
| 0.1071374013356774 | 0.0713873525637467 | 0.5333848297685080 | F | F | F |
| 0.3220635869978707 | 0.1064749369521607 | 0.5335266216303154 | F | F | F |
| 0.3446929456050469 | 0.5598504875706354 | 0.5253897752549719 | F | F | F |
| 0.8450268277640021 | 0.5598536428128256 | 0.5249275287208306 | F | F | F |
| 0.8214752461005688 | 0.1071374013356774 | 0.5333848297685080 | F | F | F |
| 0.3333333333333357 | 0.3333333333333357 | 0.5295973615149521 | F | F | F |
| 0.3334481086611234 | 0.8333859062698394 | 0.5291799365853791 | F | F | F |
| 0.8333859062698394 | 0.8331659850690301 | 0.5291799365853791 | F | F | F |
| 0.8331659850690301 | 0.3334481086611234 | 0.5291799365853791 | F | F | F |
| 0.7563933808887543 | 0.0115682381029382 | 0.6448397559338921 | T | T | T |
| 0.9045749553835933 | 0.6551201225961302 | 0.5919519606743034 | T | T | T |
| 0.4273642048285735 | 0.6793593721915135 | 0.5834837199461319 | T | T | T |
| 0.2379862304149993 | 0.9852415470137531 | 0.6500769344725119 | T | T | T |
| 0.7386318636800886 | 0.4954994549784906 | 0.6502006057692081 | T | T | T |
| 0.9298266328514310 | 0.1783178020036637 | 0.5834878289894243 | T | T | T |
| 0.4020341943497397 | 0.1556714765853936 | 0.5919346804475526 | T | T | T |
| 0.2667858318864291 | 0.5124492007588806 | 0.6403729803289836 | T | T | T |
| 0.2312263332552137 | 0.7573266094087185 | 0.6445037534968123 | T | T | T |
| 0.4393207744105717 | 0.9056081163150758 | 0.5923758780656602 | T | T | T |
| 0.8932692528515833 | 0.4276558825843185 | 0.5834168552577419 | T | T | T |
| 0.7794288170026062 | 0.2411089860054775 | 0.6484939742473054 | T | T | T |
| 0.7676791073883125 | 0.7422218280767711 | 0.6503943147505454 | T | T | T |
| 0.8897548301454200 | 0.9305152367700613 | 0.5831204229609085 | T | T | T |
| 0.4431254408682589 | 0.4019249821993676 | 0.5918124729325174 | T | T | T |
| 0.2195496727391151 | 0.2663587945970924 | 0.6408029619062331 | T | T | T |
| 0.0097242140554985 | 0.2318131970700795 | 0.6443551700899334 | T | T | T |
| 0.6548616787438363 | 0.4405448357575426 | 0.5921029591062159 | T | T | T |
| 0.6780032684410665 | 0.8940340994172157 | 0.5834042919879953 | T | T | T |
| 0.9848552503901239 | 0.7767615934782471 | 0.6478816712764865 | T | T | T |
| 0.4896272958521158 | 0.7701177115081669 | 0.6507021026359421 | T | T | T |
| 0.1799822375482762 | 0.8914464439598470 | 0.5831983939485815 | T | T | T |
| 0.1549659636242739 | 0.4423328916659750 | 0.5918975041104052 | T | T | T |
| 0.5143333452736442 | 0.2203054600889296 | 0.6408132928353094 | T | T | T |
| 0.0088730606895887 | 0.9851358745906109 | 0.6427905595183926 | T | T | T |
| 0.6658665154603821 | 0.6677234989002055 | 0.5873891776291726 | T | T | T |
| 0.9908186534740698 | 0.4974000820445707 | 0.6455022128406671 | T | T | T |
| 0.6686813640043178 | 0.1637393032623905 | 0.5878183503237687 | T | T | T |
| 0.4964483531043426 | 0.5120761549314145 | 0.6454879817155574 | T | T | T |
| 0.1640085559580835 | 0.1669082207565478 | 0.5878923934139501 | T | T | T |
| 0.5102912863884566 | 0.9927809792889444 | 0.6456704206730426 | T | T | T |



|                    |                    |                    |   |   |   |
|--------------------|--------------------|--------------------|---|---|---|
| 0.1679636523556355 | 0.6676152349511506 | 0.5876274809558054 | T | T | T |
| 0.8159583373333348 | 0.8601013333333327 | 0.4862116819395084 | F | F | F |
| 0.3946230123333336 | 0.9387660083333316 | 0.4585959608606061 | F | F | F |
| 0.9187303516666674 | 0.1545573616666687 | 0.4501329301675625 | F | F | F |
| 0.1692716669999967 | 0.4334446800000009 | 0.4604640541843779 | F | F | F |
| 0.3239403293333325 | 0.8159583373333348 | 0.4862116819395084 | F | F | F |
| 0.6666109793333348 | 0.3946230123333336 | 0.4585959608606061 | F | F | F |
| 0.9267122866666639 | 0.9187303516666674 | 0.4501329301675625 | F | F | F |
| 0.3972836530000023 | 0.1692716669999967 | 0.4604640541843779 | F | F | F |
| 0.8601013333333327 | 0.3239403293333325 | 0.4862116819395084 | F | F | F |
| 0.9387660083333316 | 0.6666109793333348 | 0.4585959608606061 | F | F | F |
| 0.1545573616666687 | 0.9267122866666639 | 0.4501329301675625 | F | F | F |
| 0.4334446800000009 | 0.3972836530000023 | 0.4604640541843779 | F | F | F |
| 0.1840416783333296 | 0.1398986823333317 | 0.4552789502821071 | F | F | F |
| 0.6053770033333308 | 0.0612340073333328 | 0.4828946713610023 | F | F | F |
| 0.0812696673333306 | 0.8454426573333365 | 0.4913577008838672 | F | F | F |
| 0.8307283486666677 | 0.5665553356666635 | 0.4810265780372305 | F | F | F |
| 0.6760596393333316 | 0.1840416783333367 | 0.4552789502821071 | F | F | F |
| 0.3333889893333364 | 0.6053770033333308 | 0.4828946713610023 | F | F | F |
| 0.0732876753333329 | 0.0812696673333306 | 0.4913577008838672 | F | F | F |
| 0.6027163156666688 | 0.8307283486666677 | 0.4810265780372305 | F | F | F |
| 0.1398986823333317 | 0.6760596393333316 | 0.4552789502821071 | F | F | F |
| 0.0612340073333328 | 0.3333889893333364 | 0.4828946713610023 | F | F | F |
| 0.8454426573333365 | 0.0732876753333329 | 0.4913577008838672 | F | F | F |
| 0.5665553356666635 | 0.6027163156666688 | 0.4810265780372305 | F | F | F |
| 0.5157927795144346 | 0.4732687373369373 | 0.5137680585633078 | F | F | F |
| 0.9389780411721915 | 0.3945739458359014 | 0.5412288865474011 | F | F | F |
| 0.4138055884135099 | 0.1792879430058036 | 0.5501013560831254 | F | F | F |
| 0.1643402231079705 | 0.8991522013241848 | 0.5396430093322451 | F | F | F |
| 0.0109384831486281 | 0.5157927795144346 | 0.5137680585633078 | F | F | F |
| 0.6664480129919070 | 0.9389780411721915 | 0.5412288865474011 | F | F | F |
| 0.4069064685806794 | 0.4138055884135099 | 0.5501013560831254 | F | F | F |
| 0.9365075755678447 | 0.1643402231079705 | 0.5396430093322451 | F | F | F |
| 0.4732687373369373 | 0.0109384831486281 | 0.5137680585633078 | F | F | F |
| 0.3945739458359014 | 0.6664480129919070 | 0.5412288865474011 | F | F | F |
| 0.1792879430058036 | 0.4069064685806794 | 0.5501013560831254 | F | F | F |
| 0.8991522013241848 | 0.9365075755678447 | 0.5396430093322451 | F | F | F |
| 0.1502078384511734 | 0.1932397001298156 | 0.5448734685138632 | F | F | F |
| 0.7272745789267816 | 0.2725057257219632 | 0.5171331615441943 | F | F | F |
| 0.2523256400471894 | 0.4873897408432910 | 0.5086482917388153 | F | F | F |
| 0.5022127006463535 | 0.7673910184547594 | 0.5188430143373637 | F | F | F |
| 0.6565524614190181 | 0.1502078384511734 | 0.5448734685138632 | F | F | F |
| 0.0002196953512481 | 0.7272745789267816 | 0.5171331615441943 | F | F | F |
| 0.2602846191095196 | 0.2523256400471894 | 0.5086482917388153 | F | F | F |

|                    |                    |                    |   |   |   |
|--------------------|--------------------|--------------------|---|---|---|
| 0.7303962808988871 | 0.5022127006463535 | 0.5188430143373637 | F | F | F |
| 0.1932397001298156 | 0.6565524614190181 | 0.5448734685138632 | F | F | F |
| 0.2725057257219632 | 0.0002196953512481 | 0.5171331615441943 | F | F | F |
| 0.4873897408432910 | 0.2602846191095196 | 0.5086482917388153 | F | F | F |
| 0.7673910184547594 | 0.7303962808988871 | 0.5188430143373637 | F | F | F |
| 0.8195663421833538 | 0.8526468016081329 | 0.6609116190578546 | T | T | T |
| 0.8501594854331165 | 0.8059116067722477 | 0.5724555672630210 | T | T | T |
| 0.2733797309526916 | 0.7272268058412215 | 0.6005009912076035 | T | T | T |
| 0.3967681482823708 | 0.9427246071443268 | 0.6360106048759246 | T | T | T |
| 0.7471904566867026 | 0.5138948233343570 | 0.6082747661564435 | T | T | T |
| 0.9263774705972676 | 0.1488301116307677 | 0.6254573310470549 | T | T | T |
| 0.4961777281065141 | 0.2313754947284825 | 0.5983072680578350 | T | T | T |
| 0.1713307353839758 | 0.4386730029092912 | 0.6391627551341715 | T | T | T |
| 0.3282780086316355 | 0.8195593776343524 | 0.6617425607153057 | T | T | T |
| 0.3443472818162924 | 0.8506702604614217 | 0.5723596066308314 | T | T | T |
| 0.9995690609865141 | 0.2734190595548830 | 0.6004341686923812 | T | T | T |
| 0.6598857001769926 | 0.3988909195199309 | 0.6354626552317770 | T | T | T |
| 0.7394567140262590 | 0.7482063307769662 | 0.6083516740272998 | T | T | T |
| 0.9147092215190394 | 0.9271033065813737 | 0.6254612894857250 | T | T | T |
| 0.2742352869729051 | 0.4932359017288470 | 0.5977481658110122 | T | T | T |
| 0.3893341111307309 | 0.1720387355216100 | 0.6394674120165167 | T | T | T |
| 0.8515143818209190 | 0.3351281579260299 | 0.6596730849957753 | T | T | T |
| 0.8055603776036474 | 0.3439808996252433 | 0.5725301041729983 | T | T | T |
| 0.7249188730794225 | 0.0001844258209093 | 0.6002835477092916 | T | T | T |
| 0.9407365365222952 | 0.6610878737973045 | 0.6354417873739093 | T | T | T |
| 0.5117265168878335 | 0.7407454970590309 | 0.6086505224560143 | T | T | T |
| 0.1603528222597531 | 0.9240451981498383 | 0.6252357701219248 | T | T | T |
| 0.2312234939904254 | 0.2724207449149839 | 0.5982200368803430 | T | T | T |
| 0.4396185441766363 | 0.3891519627638360 | 0.6394073441656061 | T | T | T |
| 0.4816601978630282 | 0.5263635771031914 | 0.6029402445820345 | T | T | T |
| 0.1827194071215255 | 0.1387114087232273 | 0.6313104507796952 | T | T | T |
| 0.5964749044152264 | 0.0669853866001629 | 0.6585153679742847 | T | T | T |
| 0.0619808959394964 | 0.6056536762950596 | 0.5762726695411395 | T | T | T |
| 0.0792691749935501 | 0.8358415303190754 | 0.6648314244397882 | T | T | T |
| 0.5844850629611436 | 0.8228440508135698 | 0.5671357945030855 | T | T | T |
| 0.8263709602920541 | 0.5759655385615375 | 0.6595368791358873 | T | T | T |
| 0.8359076500420977 | 0.1012566643743950 | 0.5777073831445377 | T | T | T |
| 0.9911659161743896 | 0.4825776098372078 | 0.6029674146751755 | T | T | T |
| 0.6812278644221517 | 0.1804080269573338 | 0.6311799021111665 | T | T | T |
| 0.3364813828927590 | 0.5967662230820541 | 0.6581714008682072 | T | T | T |
| 0.3316035110001045 | 0.0624504898414846 | 0.5765725326134853 | T | T | T |
| 0.0856910755665069 | 0.0913975259034881 | 0.6719613154584697 | T | T | T |
| 0.5919746103877054 | 0.5862231749240939 | 0.5671707238876769 | T | T | T |
| 0.5989801450166657 | 0.8283236503309467 | 0.6593890870673252 | T | T | T |

|                    |                    |                    |   |   |   |
|--------------------|--------------------|--------------------|---|---|---|
| 0.0621104679117975 | 0.8373804907359800 | 0.5782849194042001 | T | T | T |
| 0.5252743072454753 | 0.9922881137630374 | 0.6031770201301466 | T | T | T |
| 0.1403892536914967 | 0.6722791487364781 | 0.6299359641892183 | T | T | T |
| 0.0652816388573639 | 0.3373310426194514 | 0.6579651225948143 | T | T | T |
| 0.6063197566732379 | 0.3314889945686997 | 0.5765361522031094 | T | T | T |
| 0.8141418735496013 | 0.1096594735780071 | 0.6754595367720053 | T | T | T |
| 0.8212146322013391 | 0.5928382386898408 | 0.5670157127537556 | T | T | T |
| 0.5719078884666278 | 0.6011299984131397 | 0.6593645677840143 | T | T | T |
| 0.1011560633802245 | 0.0625063393421002 | 0.5777304488846446 | T | T | T |
| 0.9522570804943663 | 0.0953150661392339 | 0.6841560655390169 | T | T | T |

**Site 5:**

In O Pt

1.0000000000000000

14.6383517878741038 0.0000000000000000 0.0000000000000000

7.3191758939370519 12.6771845178323304 0.0000000000000000

0.0000000000000000 0.0000000000000000 51.0694492725965290

In O Pt

64 96 1

Selective dynamics

Direct

|                    |                    |                    |   |   |   |
|--------------------|--------------------|--------------------|---|---|---|
| 0.7611480013333320 | 0.0111480013333320 | 0.4668317439885570 | F | F | F |
| 0.2388520043333315 | 0.9888520043333315 | 0.4746588917436156 | F | F | F |
| 0.7388519966666678 | 0.4888520196666661 | 0.4746588944350378 | F | F | F |
| 0.2611479936666683 | 0.5111480166666666 | 0.4668317466799934 | F | F | F |
| 0.2277039973333359 | 0.7611480013333320 | 0.4668317439885570 | F | F | F |
| 0.7722959913333298 | 0.2388520043333315 | 0.4746588917436156 | F | F | F |
| 0.7722959836666661 | 0.7388519966666678 | 0.4746588944350378 | F | F | F |
| 0.2277039896666651 | 0.2611479936666683 | 0.4668317466799934 | F | F | F |
| 0.0111480013333320 | 0.2277039973333359 | 0.4668317439885570 | F | F | F |
| 0.9888520043333315 | 0.7722959913333369 | 0.4746588917436156 | F | F | F |
| 0.4888520196666661 | 0.7722959836666661 | 0.4746588944350378 | F | F | F |
| 0.5111480166666666 | 0.2277039896666651 | 0.4668317466799934 | F | F | F |
| 0.0000000000000000 | 0.0000000000000000 | 0.4707453188607431 | F | F | F |
| 0.9999999846666654 | 0.5000000076666637 | 0.4707453242436088 | F | F | F |
| 0.5000000076666637 | 0.5000000076666637 | 0.4707453242436088 | F | F | F |
| 0.5000000076666637 | 0.9999999846666654 | 0.4707453242436088 | F | F | F |
| 0.5714614760499686 | 0.3220635869978707 | 0.5335266216303154 | F | F | F |
| 0.0954565668243177 | 0.3446929456050469 | 0.5253897752549719 | F | F | F |
| 0.5951195294231795 | 0.8450268277640021 | 0.5249275287208306 | F | F | F |
| 0.0713873525637467 | 0.8214752461005688 | 0.5333848297685080 | F | F | F |

|                    |                    |                    |   |   |   |
|--------------------|--------------------|--------------------|---|---|---|
| 0.1064749369521607 | 0.5714614760499686 | 0.5335266216303154 | F | F | F |
| 0.5598504875706354 | 0.0954565668243177 | 0.5253897752549719 | F | F | F |
| 0.5598536428128256 | 0.5951195294231795 | 0.5249275287208306 | F | F | F |
| 0.1071374013356774 | 0.0713873525637467 | 0.5333848297685080 | F | F | F |
| 0.3220635869978707 | 0.1064749369521607 | 0.5335266216303154 | F | F | F |
| 0.3446929456050469 | 0.5598504875706354 | 0.5253897752549719 | F | F | F |
| 0.8450268277640021 | 0.5598536428128256 | 0.5249275287208306 | F | F | F |
| 0.8214752461005688 | 0.1071374013356774 | 0.5333848297685080 | F | F | F |
| 0.3333333333333357 | 0.3333333333333357 | 0.5295973615149521 | F | F | F |
| 0.3334481086611234 | 0.8333859062698394 | 0.5291799365853791 | F | F | F |
| 0.8333859062698394 | 0.8331659850690301 | 0.5291799365853791 | F | F | F |
| 0.8331659850690301 | 0.3334481086611234 | 0.5291799365853791 | F | F | F |
| 0.7548813534139319 | 0.0043404427710665 | 0.6432203374446075 | T | T | T |
| 0.9037636896052454 | 0.6529870001301680 | 0.5919485777632929 | T | T | T |
| 0.4249967503010847 | 0.6785831089256085 | 0.5834335768464290 | T | T | T |
| 0.2301522818292282 | 0.9820960929826111 | 0.6483307057730474 | T | T | T |
| 0.7348428752749392 | 0.4937974921184552 | 0.6502031963811044 | T | T | T |
| 0.9282614995214670 | 0.1753967742520507 | 0.5848044448562900 | T | T | T |
| 0.4004472331615478 | 0.1539729376927794 | 0.5920834321550688 | T | T | T |
| 0.2637557384743184 | 0.5110939872432978 | 0.6403420684130109 | T | T | T |
| 0.2234719821304752 | 0.7585215710855779 | 0.6441668456422706 | T | T | T |
| 0.4374427070161554 | 0.9037139733456935 | 0.5918632693205025 | T | T | T |
| 0.8910632992524232 | 0.4247945669595583 | 0.5835568767713398 | T | T | T |
| 0.7695513472586853 | 0.2461682142749854 | 0.6499405428464754 | T | T | T |
| 0.7651639638493339 | 0.7375103152391189 | 0.6500611478172516 | T | T | T |
| 0.8910701916189148 | 0.9285142906280699 | 0.5836683686757520 | T | T | T |
| 0.4413721610191715 | 0.4005091795372228 | 0.5920996806299974 | T | T | T |
| 0.2170927273830355 | 0.2638521507569896 | 0.6405429242506255 | T | T | T |
| 0.0077358609629602 | 0.2253245121605596 | 0.6451460487676178 | T | T | T |
| 0.6521572277265174 | 0.4401852402016516 | 0.5920084606119316 | T | T | T |
| 0.6775116098357347 | 0.8921093669292564 | 0.5834271196267992 | T | T | T |
| 0.9809607656831842 | 0.7782378098543433 | 0.6477338878963955 | T | T | T |
| 0.4843817207995504 | 0.7690229169900699 | 0.6500613344215010 | T | T | T |
| 0.1758355515613277 | 0.8909555998245355 | 0.5837075488806350 | T | T | T |
| 0.1532030013264168 | 0.4413216198527301 | 0.5919591145931558 | T | T | T |
| 0.5151732740698355 | 0.2170050934375167 | 0.6407392828190310 | T | T | T |
| 0.9997924994911418 | 0.9955536617824046 | 0.6498270533156156 | T | T | T |
| 0.6647858253180906 | 0.6658720437602426 | 0.5871751313976141 | T | T | T |
| 0.9886010476856333 | 0.4935654158612175 | 0.6452018291142265 | T | T | T |
| 0.6681470240655941 | 0.1638924200019163 | 0.5878057290942954 | T | T | T |
| 0.4916595530104081 | 0.5128059627427801 | 0.6455400410563688 | T | T | T |
| 0.1624582242807316 | 0.1657987207829283 | 0.5878849863633417 | T | T | T |
| 0.5055461611065626 | 0.9905927448001154 | 0.6454185519343258 | T | T | T |
| 0.1668147384699654 | 0.6664580034113097 | 0.5875645795414947 | T | T | T |

0.8159583373333348 0.8601013333333327 0.4862116819395084 F F F  
0.3946230123333336 0.9387660083333316 0.4585959608606061 F F F  
0.9187303516666674 0.1545573616666687 0.4501329301675625 F F F  
0.1692716669999967 0.4334446800000009 0.4604640541843779 F F F  
0.3239403293333325 0.8159583373333348 0.4862116819395084 F F F  
0.6666109793333348 0.3946230123333336 0.4585959608606061 F F F  
0.9267122866666639 0.9187303516666674 0.4501329301675625 F F F  
0.3972836530000023 0.1692716669999967 0.4604640541843779 F F F  
0.8601013333333327 0.3239403293333325 0.4862116819395084 F F F  
0.9387660083333316 0.6666109793333348 0.4585959608606061 F F F  
0.1545573616666687 0.9267122866666639 0.4501329301675625 F F F  
0.4334446800000009 0.3972836530000023 0.4604640541843779 F F F  
0.1840416783333296 0.1398986823333317 0.4552789502821071 F F F  
0.6053770033333308 0.0612340073333328 0.4828946713610023 F F F  
0.0812696673333306 0.8454426573333365 0.4913577008838672 F F F  
0.8307283486666677 0.5665553356666635 0.4810265780372305 F F F  
0.6760596393333316 0.1840416783333367 0.4552789502821071 F F F  
0.3333889893333364 0.6053770033333308 0.4828946713610023 F F F  
0.0732876753333329 0.0812696673333306 0.4913577008838672 F F F  
0.6027163156666688 0.8307283486666677 0.4810265780372305 F F F  
0.1398986823333317 0.6760596393333316 0.4552789502821071 F F F  
0.0612340073333328 0.3333889893333364 0.4828946713610023 F F F  
0.8454426573333365 0.0732876753333329 0.4913577008838672 F F F  
0.5665553356666635 0.6027163156666688 0.4810265780372305 F F F  
0.5157927795144346 0.4732687373369373 0.5137680585633078 F F F  
0.9389780411721915 0.3945739458359014 0.5412288865474011 F F F  
0.4138055884135099 0.1792879430058036 0.5501013560831254 F F F  
0.1643402231079705 0.8991522013241848 0.5396430093322451 F F F  
0.0109384831486281 0.5157927795144346 0.5137680585633078 F F F  
0.6664480129919070 0.9389780411721915 0.5412288865474011 F F F  
0.4069064685806794 0.4138055884135099 0.5501013560831254 F F F  
0.9365075755678447 0.1643402231079705 0.5396430093322451 F F F  
0.4732687373369373 0.0109384831486281 0.5137680585633078 F F F  
0.3945739458359014 0.6664480129919070 0.5412288865474011 F F F  
0.1792879430058036 0.4069064685806794 0.5501013560831254 F F F  
0.8991522013241848 0.9365075755678447 0.5396430093322451 F F F  
0.1502078384511734 0.1932397001298156 0.5448734685138632 F F F  
0.7272745789267816 0.2725057257219632 0.5171331615441943 F F F  
0.2523256400471894 0.4873897408432910 0.5086482917388153 F F F  
0.5022127006463535 0.7673910184547594 0.5188430143373637 F F F  
0.6565524614190181 0.1502078384511734 0.5448734685138632 F F F  
0.0002196953512481 0.7272745789267816 0.5171331615441943 F F F  
0.2602846191095196 0.2523256400471894 0.5086482917388153 F F F  
0.7303962808988871 0.5022127006463535 0.5188430143373637 F F F

|                    |                    |                    |   |   |   |
|--------------------|--------------------|--------------------|---|---|---|
| 0.1932397001298156 | 0.6565524614190181 | 0.5448734685138632 | F | F | F |
| 0.2725057257219632 | 0.0002196953512481 | 0.5171331615441943 | F | F | F |
| 0.4873897408432910 | 0.2602846191095196 | 0.5086482917388153 | F | F | F |
| 0.7673910184547594 | 0.7303962808988871 | 0.5188430143373637 | F | F | F |
| 0.8148690391358824 | 0.8474079515739916 | 0.6601247503993832 | T | T | T |
| 0.8495219717239789 | 0.8039624195597754 | 0.5722689786056291 | T | T | T |
| 0.2720902617331413 | 0.7257118259517035 | 0.6000350133814213 | T | T | T |
| 0.3914328671461922 | 0.9409025849816377 | 0.6354986503792884 | T | T | T |
| 0.7441258828498060 | 0.5127537059186053 | 0.6081886653326444 | T | T | T |
| 0.9157658719794884 | 0.1509199704728564 | 0.6275902138560756 | T | T | T |
| 0.4944794041794832 | 0.2298152309235077 | 0.5980787943860241 | T | T | T |
| 0.1676420355405015 | 0.4373436713330645 | 0.6388674511517776 | T | T | T |
| 0.3242295161444220 | 0.8161538183972558 | 0.6606558887924655 | T | T | T |
| 0.3412331935250068 | 0.8502623185691472 | 0.5722204456263167 | T | T | T |
| 0.9970870419238836 | 0.2700213772487363 | 0.6006724682108550 | T | T | T |
| 0.6536758956366107 | 0.4006869178498572 | 0.6349757447587795 | T | T | T |
| 0.7381502205302125 | 0.7460680786121149 | 0.6080018474183960 | T | T | T |
| 0.9175500395271177 | 0.9252763780251775 | 0.6255889616745784 | T | T | T |
| 0.2718719535879436 | 0.4924876082498215 | 0.5977478755053466 | T | T | T |
| 0.3871554815597644 | 0.1702313720544386 | 0.6391654029844057 | T | T | T |
| 0.8496938940446482 | 0.3355032622855805 | 0.6598620654525118 | T | T | T |
| 0.8034759491692478 | 0.3419335452673659 | 0.5723110991470775 | T | T | T |
| 0.7240130565623701 | 0.9989740026910089 | 0.5994922230263362 | T | T | T |
| 0.9413331642672202 | 0.6567357771900593 | 0.6351487322157956 | T | T | T |
| 0.5103872424747085 | 0.7392474276429778 | 0.6080152821108888 | T | T | T |
| 0.1478104863284961 | 0.9210210314835618 | 0.6251571113888972 | T | T | T |
| 0.2295862388700744 | 0.2715337311748126 | 0.5978389418844260 | T | T | T |
| 0.4372905691940568 | 0.3871170320331509 | 0.6392467229772769 | T | T | T |
| 0.4782846242047494 | 0.5261142249201330 | 0.6028725118378485 | T | T | T |
| 0.1824476835508325 | 0.1376623695708779 | 0.6305786295706091 | T | T | T |
| 0.5942027603475031 | 0.0625092148583014 | 0.6578155650445275 | T | T | T |
| 0.0607183676167347 | 0.6041280146172500 | 0.5760897985481527 | T | T | T |
| 0.0743195333197803 | 0.8357673252559507 | 0.6664291458125872 | T | T | T |
| 0.5841989226506877 | 0.8211330438887566 | 0.5667658643384004 | T | T | T |
| 0.8246467514830520 | 0.5722375753740684 | 0.6592726791141701 | T | T | T |
| 0.8355498217014099 | 0.0999412774228825 | 0.5774576470713295 | T | T | T |
| 0.9895292993905601 | 0.4794093433594410 | 0.6026065770244303 | T | T | T |
| 0.6796517121934964 | 0.1774734505337196 | 0.6306552760894252 | T | T | T |
| 0.3316672254973149 | 0.5961031516815882 | 0.6581686296123523 | T | T | T |
| 0.3307100317646946 | 0.0611247351513952 | 0.5760541928242321 | T | T | T |
| 0.0787585259283481 | 0.0754727041191947 | 0.6672876272401839 | T | T | T |
| 0.5904534243602001 | 0.5853003233878731 | 0.5670056030502899 | T | T | T |
| 0.5950331556528298 | 0.8256900196258932 | 0.6584335183919849 | T | T | T |
| 0.0613470719425663 | 0.8342551522431355 | 0.5774195618368059 | T | T | T |

|                    |                    |                    |   |   |   |
|--------------------|--------------------|--------------------|---|---|---|
| 0.5235796945872608 | 0.9894821561185760 | 0.6029566564640066 | T | T | T |
| 0.1375494140634013 | 0.6727440534125252 | 0.6298315813271381 | T | T | T |
| 0.0636225289991938 | 0.3336929948437309 | 0.6582678981509310 | T | T | T |
| 0.6044008354694409 | 0.3316652027662774 | 0.5763724500958612 | T | T | T |
| 0.8480029992033410 | 0.0413444136605717 | 0.6720674080565324 | T | T | T |
| 0.8201178371245283 | 0.5907833111865888 | 0.5669347317757110 | T | T | T |
| 0.5681607393263155 | 0.6007273428705558 | 0.6594635868329434 | T | T | T |
| 0.0996817546366363 | 0.0617774058972635 | 0.5776566761251497 | T | T | T |
| 0.7706969139106532 | 0.1597900296997151 | 0.6940054268039192 | T | T | T |

**Site 6:**

In O Pt

1.0000000000000000

|                     |                     |                     |
|---------------------|---------------------|---------------------|
| 14.6383517878741038 | 0.0000000000000000  | 0.0000000000000000  |
| 7.3191758939370519  | 12.6771845178323304 | 0.0000000000000000  |
| 0.0000000000000000  | 0.0000000000000000  | 51.0694492725965290 |

In O Pt

64 96 1

Selective dynamics

Direct

|                    |                    |                    |   |   |   |
|--------------------|--------------------|--------------------|---|---|---|
| 0.7611480013333320 | 0.0111480013333320 | 0.4668317439885570 | F | F | F |
| 0.2388520043333315 | 0.9888520043333315 | 0.4746588917436156 | F | F | F |
| 0.7388519966666678 | 0.4888520196666661 | 0.4746588944350378 | F | F | F |
| 0.2611479936666683 | 0.5111480166666666 | 0.4668317466799934 | F | F | F |
| 0.2277039973333359 | 0.7611480013333320 | 0.4668317439885570 | F | F | F |
| 0.7722959913333298 | 0.2388520043333315 | 0.4746588917436156 | F | F | F |
| 0.7722959836666661 | 0.7388519966666678 | 0.4746588944350378 | F | F | F |
| 0.2277039896666651 | 0.2611479936666683 | 0.4668317466799934 | F | F | F |
| 0.0111480013333320 | 0.2277039973333359 | 0.4668317439885570 | F | F | F |
| 0.9888520043333315 | 0.7722959913333369 | 0.4746588917436156 | F | F | F |
| 0.4888520196666661 | 0.7722959836666661 | 0.4746588944350378 | F | F | F |
| 0.5111480166666666 | 0.2277039896666651 | 0.4668317466799934 | F | F | F |
| 0.0000000000000000 | 0.0000000000000000 | 0.4707453188607431 | F | F | F |
| 0.9999999846666654 | 0.5000000076666637 | 0.4707453242436088 | F | F | F |
| 0.5000000076666637 | 0.5000000076666637 | 0.4707453242436088 | F | F | F |
| 0.5000000076666637 | 0.9999999846666654 | 0.4707453242436088 | F | F | F |
| 0.5714614760499686 | 0.3220635869978707 | 0.5335266216303154 | F | F | F |
| 0.0954565668243177 | 0.3446929456050469 | 0.5253897752549719 | F | F | F |
| 0.5951195294231795 | 0.8450268277640021 | 0.5249275287208306 | F | F | F |
| 0.0713873525637467 | 0.8214752461005688 | 0.5333848297685080 | F | F | F |
| 0.1064749369521607 | 0.5714614760499686 | 0.5335266216303154 | F | F | F |
| 0.5598504875706354 | 0.0954565668243177 | 0.5253897752549719 | F | F | F |

|                    |                    |                    |   |   |   |
|--------------------|--------------------|--------------------|---|---|---|
| 0.5598536428128256 | 0.5951195294231795 | 0.5249275287208306 | F | F | F |
| 0.1071374013356774 | 0.0713873525637467 | 0.5333848297685080 | F | F | F |
| 0.3220635869978707 | 0.1064749369521607 | 0.5335266216303154 | F | F | F |
| 0.3446929456050469 | 0.5598504875706354 | 0.5253897752549719 | F | F | F |
| 0.8450268277640021 | 0.5598536428128256 | 0.5249275287208306 | F | F | F |
| 0.8214752461005688 | 0.1071374013356774 | 0.5333848297685080 | F | F | F |
| 0.3333333333333357 | 0.3333333333333357 | 0.5295973615149521 | F | F | F |
| 0.3334481086611234 | 0.8333859062698394 | 0.5291799365853791 | F | F | F |
| 0.8333859062698394 | 0.8331659850690301 | 0.5291799365853791 | F | F | F |
| 0.8331659850690301 | 0.3334481086611234 | 0.5291799365853791 | F | F | F |
| 0.7615850062135494 | 0.0149618360471623 | 0.6444639767016260 | T | T | T |
| 0.9047937241040357 | 0.6556881996740903 | 0.5927756319740122 | T | T | T |
| 0.4267576380935799 | 0.6797803987271801 | 0.5835251416632257 | T | T | T |
| 0.2344803250393560 | 0.9841682783804594 | 0.6477312702421542 | T | T | T |
| 0.7325725073200977 | 0.4832033650007094 | 0.6499055579650096 | T | T | T |
| 0.9303295170292473 | 0.1774501290573145 | 0.5838243197298111 | T | T | T |
| 0.4013494577211926 | 0.1552135310790576 | 0.5918917943254107 | T | T | T |
| 0.2655508786142043 | 0.5154977387701571 | 0.6404388402047261 | T | T | T |
| 0.2246325496852836 | 0.7631030554361112 | 0.6447018126186624 | T | T | T |
| 0.4398774677999098 | 0.9050589596628040 | 0.5920584756747911 | T | T | T |
| 0.8942009790467876 | 0.4275267108252982 | 0.5841382662994004 | T | T | T |
| 0.7811219447707584 | 0.2330686445133961 | 0.6478102152799934 | T | T | T |
| 0.7674907368380656 | 0.7508126552325425 | 0.6516546640062256 | T | T | T |
| 0.8918247037562651 | 0.9307218932417907 | 0.5838263688062443 | T | T | T |
| 0.4417271175699827 | 0.4018753141060017 | 0.5918895835806643 | T | T | T |
| 0.2195907330176285 | 0.2644745156771248 | 0.6403065937839972 | T | T | T |
| 0.0119342524444240 | 0.2262129947672135 | 0.6445903940112685 | T | T | T |
| 0.6540621301931429 | 0.4396898443840739 | 0.5915587394512485 | T | T | T |
| 0.6797678219362531 | 0.8928535115477857 | 0.5837114120111704 | T | T | T |
| 0.9834011003109548 | 0.7835895550068752 | 0.6477541258951395 | T | T | T |
| 0.4888788755380263 | 0.7701711460600889 | 0.6502962381402732 | T | T | T |
| 0.1772809154781896 | 0.8920452586379655 | 0.5838603880902815 | T | T | T |
| 0.1540430654074656 | 0.4432542747734910 | 0.5919212646815152 | T | T | T |
| 0.5132254089211390 | 0.2199229164832440 | 0.6403586989221312 | T | T | T |
| 0.9999550599696003 | 0.0006915760369731 | 0.6505747669376735 | T | T | T |
| 0.6672130700435662 | 0.6666262357115263 | 0.5880632267901723 | T | T | T |
| 0.0024514558533559 | 0.4991002504839134 | 0.6472206613259620 | T | T | T |
| 0.6675954277268481 | 0.1638844136609962 | 0.5876356594402595 | T | T | T |
| 0.4926675550482305 | 0.5125354002696142 | 0.6450602058770792 | T | T | T |
| 0.1637417412704625 | 0.1676348783985350 | 0.5876175006502898 | T | T | T |
| 0.5104264907332476 | 0.9927170937819839 | 0.6452654090379891 | T | T | T |
| 0.1672043970342358 | 0.6684799044466142 | 0.5877303835186105 | T | T | T |
| 0.8159583373333348 | 0.8601013333333327 | 0.4862116819395084 | F | F | F |
| 0.3946230123333336 | 0.9387660083333316 | 0.4585959608606061 | F | F | F |



|                    |                    |                    |   |   |   |
|--------------------|--------------------|--------------------|---|---|---|
| 0.9187303516666674 | 0.1545573616666687 | 0.4501329301675625 | F | F | F |
| 0.1692716669999967 | 0.4334446800000009 | 0.4604640541843779 | F | F | F |
| 0.3239403293333325 | 0.8159583373333348 | 0.4862116819395084 | F | F | F |
| 0.6666109793333348 | 0.3946230123333336 | 0.4585959608606061 | F | F | F |
| 0.9267122866666639 | 0.9187303516666674 | 0.4501329301675625 | F | F | F |
| 0.3972836530000023 | 0.1692716669999967 | 0.4604640541843779 | F | F | F |
| 0.8601013333333327 | 0.3239403293333325 | 0.4862116819395084 | F | F | F |
| 0.9387660083333316 | 0.6666109793333348 | 0.4585959608606061 | F | F | F |
| 0.1545573616666687 | 0.9267122866666639 | 0.4501329301675625 | F | F | F |
| 0.4334446800000009 | 0.3972836530000023 | 0.4604640541843779 | F | F | F |
| 0.1840416783333296 | 0.1398986823333317 | 0.4552789502821071 | F | F | F |
| 0.6053770033333308 | 0.0612340073333328 | 0.4828946713610023 | F | F | F |
| 0.0812696673333306 | 0.8454426573333365 | 0.4913577008838672 | F | F | F |
| 0.8307283486666677 | 0.5665553356666635 | 0.4810265780372305 | F | F | F |
| 0.6760596393333316 | 0.1840416783333367 | 0.4552789502821071 | F | F | F |
| 0.3333889893333364 | 0.6053770033333308 | 0.4828946713610023 | F | F | F |
| 0.0732876753333329 | 0.0812696673333306 | 0.4913577008838672 | F | F | F |
| 0.6027163156666688 | 0.8307283486666677 | 0.4810265780372305 | F | F | F |
| 0.1398986823333317 | 0.6760596393333316 | 0.4552789502821071 | F | F | F |
| 0.0612340073333328 | 0.3333889893333364 | 0.4828946713610023 | F | F | F |
| 0.8454426573333365 | 0.0732876753333329 | 0.4913577008838672 | F | F | F |
| 0.5665553356666635 | 0.6027163156666688 | 0.4810265780372305 | F | F | F |
| 0.5157927795144346 | 0.4732687373369373 | 0.5137680585633078 | F | F | F |
| 0.9389780411721915 | 0.3945739458359014 | 0.5412288865474011 | F | F | F |
| 0.4138055884135099 | 0.1792879430058036 | 0.5501013560831254 | F | F | F |
| 0.1643402231079705 | 0.8991522013241848 | 0.5396430093322451 | F | F | F |
| 0.0109384831486281 | 0.5157927795144346 | 0.5137680585633078 | F | F | F |
| 0.6664480129919070 | 0.9389780411721915 | 0.5412288865474011 | F | F | F |
| 0.4069064685806794 | 0.4138055884135099 | 0.5501013560831254 | F | F | F |
| 0.9365075755678447 | 0.1643402231079705 | 0.5396430093322451 | F | F | F |
| 0.4732687373369373 | 0.0109384831486281 | 0.5137680585633078 | F | F | F |
| 0.3945739458359014 | 0.6664480129919070 | 0.5412288865474011 | F | F | F |
| 0.1792879430058036 | 0.4069064685806794 | 0.5501013560831254 | F | F | F |
| 0.8991522013241848 | 0.9365075755678447 | 0.5396430093322451 | F | F | F |
| 0.1502078384511734 | 0.1932397001298156 | 0.5448734685138632 | F | F | F |
| 0.7272745789267816 | 0.2725057257219632 | 0.5171331615441943 | F | F | F |
| 0.2523256400471894 | 0.4873897408432910 | 0.5086482917388153 | F | F | F |
| 0.5022127006463535 | 0.7673910184547594 | 0.5188430143373637 | F | F | F |
| 0.6565524614190181 | 0.1502078384511734 | 0.5448734685138632 | F | F | F |
| 0.0002196953512481 | 0.7272745789267816 | 0.5171331615441943 | F | F | F |
| 0.2602846191095196 | 0.2523256400471894 | 0.5086482917388153 | F | F | F |
| 0.7303962808988871 | 0.5022127006463535 | 0.5188430143373637 | F | F | F |
| 0.1932397001298156 | 0.6565524614190181 | 0.5448734685138632 | F | F | F |
| 0.2725057257219632 | 0.0002196953512481 | 0.5171331615441943 | F | F | F |

|                    |                    |                    |   |   |   |
|--------------------|--------------------|--------------------|---|---|---|
| 0.4873897408432910 | 0.2602846191095196 | 0.5086482917388153 | F | F | F |
| 0.7673910184547594 | 0.7303962808988871 | 0.5188430143373637 | F | F | F |
| 0.8190739363105481 | 0.8593220492576950 | 0.6611141687060055 | T | T | T |
| 0.8505472608702592 | 0.8051119387826664 | 0.5723447866821395 | T | T | T |
| 0.2733172810009271 | 0.7266859896528757 | 0.6001455449796614 | T | T | T |
| 0.3965747356685756 | 0.9423205376942688 | 0.6351728128537479 | T | T | T |
| 0.7457277238612872 | 0.5116915799086907 | 0.6085271319865833 | T | T | T |
| 0.9262984317117757 | 0.1509925973206647 | 0.6253128895754266 | T | T | T |
| 0.4935868318058487 | 0.2322531909279004 | 0.5977500401089519 | T | T | T |
| 0.1750887846978847 | 0.4371404634917545 | 0.6395412903659028 | T | T | T |
| 0.3280172474291600 | 0.8196528890639544 | 0.6606483025521707 | T | T | T |
| 0.3439014809013523 | 0.8509719236013842 | 0.5722461052322562 | T | T | T |
| 0.9997709841070507 | 0.2734170289684467 | 0.6001151904798527 | T | T | T |
| 0.6563206867698481 | 0.3943918882036302 | 0.6349607847924439 | T | T | T |
| 0.7389127335978206 | 0.7486228279460749 | 0.6093636853122343 | T | T | T |
| 0.9230703194459400 | 0.9282465156873089 | 0.6251295552033632 | T | T | T |
| 0.2725504791883993 | 0.4948260660377027 | 0.5978750116437616 | T | T | T |
| 0.3891357312678360 | 0.1716115596966331 | 0.6389694808889158 | T | T | T |
| 0.8502951459156849 | 0.3269316744495190 | 0.6608730881004173 | T | T | T |
| 0.8055376850270506 | 0.3442571265664709 | 0.5723267634354741 | T | T | T |
| 0.7263354793222498 | 0.0000997901365748 | 0.6000757577484012 | T | T | T |
| 0.9402037382179328 | 0.6656625496245544 | 0.6348565566031253 | T | T | T |
| 0.5124458742911349 | 0.7397559093895789 | 0.6083539065953261 | T | T | T |
| 0.1504757523629963 | 0.9230839591285206 | 0.6252984400346715 | T | T | T |
| 0.2310803839190652 | 0.2740717026879193 | 0.5977430213569054 | T | T | T |
| 0.4374707199454470 | 0.3898345815840154 | 0.6391883997712758 | T | T | T |
| 0.4811604870796335 | 0.5258576242501242 | 0.6025232505676452 | T | T | T |
| 0.1856133540079820 | 0.1385259359466662 | 0.6298741040449112 | T | T | T |
| 0.5980930593337387 | 0.0658818548505903 | 0.6574847453480959 | T | T | T |
| 0.0617958217576045 | 0.6055243887659423 | 0.5761106327170272 | T | T | T |
| 0.0762656143452452 | 0.8399768233399801 | 0.6672358242575607 | T | T | T |
| 0.5866183755969455 | 0.8209051572953227 | 0.5670258375932620 | T | T | T |
| 0.8142098437378306 | 0.5723202759833423 | 0.6548112717671595 | T | T | T |
| 0.8346915161997542 | 0.1025394663457881 | 0.5773009003823271 | T | T | T |
| 0.9918888984443242 | 0.4832587406035647 | 0.6043678464474622 | T | T | T |
| 0.6737778502219288 | 0.1861318152075727 | 0.6301292302066784 | T | T | T |
| 0.3338058669320519 | 0.5999320054606365 | 0.6581120859353656 | T | T | T |
| 0.3320701747706430 | 0.0622098437029333 | 0.5761050752813724 | T | T | T |
| 0.0842752925407916 | 0.0773573652224461 | 0.6670201900972932 | T | T | T |
| 0.5923021746434627 | 0.5863532362546324 | 0.5669808781373619 | T | T | T |
| 0.5970758995545350 | 0.8296591593493822 | 0.6594601657281910 | T | T | T |
| 0.0625030204504176 | 0.8353881971198759 | 0.5773103454963924 | T | T | T |
| 0.5257798597085845 | 0.9918651614976075 | 0.6026717726627250 | T | T | T |
| 0.1390551529455520 | 0.6757787325857435 | 0.6302234606510180 | T | T | T |

|                    |                    |                    |   |   |   |
|--------------------|--------------------|--------------------|---|---|---|
| 0.0661446611007650 | 0.3349231538994132 | 0.6573835419700962 | T | T | T |
| 0.6048684284474644 | 0.3320532630107983 | 0.5761133644585463 | T | T | T |
| 0.8389056588642063 | 0.0847590361893638 | 0.6673535215608351 | T | T | T |
| 0.8227205266030378 | 0.5914963633922585 | 0.5674743081014221 | T | T | T |
| 0.5687849285799477 | 0.5998060979261944 | 0.6588969443246562 | T | T | T |
| 0.1018288596530341 | 0.0625545422254275 | 0.5773035534486498 | T | T | T |
| 0.8691953071977119 | 0.5896086244572716 | 0.6879971208603054 | T | T | T |

**Pt-SA on Indium Tin Oxide:**

**Site 1:**

In Sn O Pt

1.0000000000000000

14.6581653332033461 0.0000000000000000 0.0000000000000000

7.3189795989957736 12.7095316657975506 0.0000000000000000

-0.0098891034462902 -0.0168642175486257 51.7150080587397056

In Sn O Pt

56 8 96 1

Selective dynamics

Direct

|                    |                    |                    |   |   |   |
|--------------------|--------------------|--------------------|---|---|---|
| 0.7601334683925316 | 0.0111196284508281 | 0.4659634855339050 | F | F | F |
| 0.2397990222127078 | 0.9863352678444528 | 0.4737760756088107 | F | F | F |
| 0.7715588052310096 | 0.2382440998621718 | 0.4737760756088107 | F | F | F |
| 0.0114253481492099 | 0.2271244657591041 | 0.4659634855339050 | F | F | F |
| 0.9885071424342016 | 0.7703304135794511 | 0.4737760756088107 | F | F | F |
| 0.9992903736448469 | 0.4987274529686729 | 0.4698697869370179 | F | F | F |
| 0.5006083460974438 | 0.9974548753487298 | 0.4698697869370179 | F | F | F |
| 0.5711026190239110 | 0.3212438999490672 | 0.5325343176450374 | F | F | F |
| 0.0957701894278102 | 0.3438156643639090 | 0.5244126049570497 | F | F | F |
| 0.5954002788407777 | 0.8428761420777775 | 0.5239512181533499 | F | F | F |
| 0.0723457897014868 | 0.8193845017652066 | 0.5323927895013369 | F | F | F |
| 0.1070648802758711 | 0.5700070441001301 | 0.5325343176450374 | F | F | F |
| 0.5592163182809529 | 0.0952136194229070 | 0.5244126049570497 | F | F | F |
| 0.5598611324288072 | 0.5936048851403370 | 0.5239512181533499 | F | F | F |
| 0.1070842580214730 | 0.0712056639447667 | 0.5323927895013369 | F | F | F |
| 0.3217649856391844 | 0.1062039465938440 | 0.5325343176450374 | F | F | F |
| 0.3449459772301964 | 0.5584256068562183 | 0.5244126049570497 | F | F | F |
| 0.8446035586083482 | 0.5584287540679753 | 0.5239512181533499 | F | F | F |
| 0.8205024372159997 | 0.1068647249330610 | 0.5323927895013369 | F | F | F |
| 0.3340676120032526 | 0.8312648480018296 | 0.5281957169818696 | F | F | F |
| 0.8324680001261981 | 0.3325994467597084 | 0.5281957169818696 | F | F | F |
| 0.3333108283129889 | 0.3324849635476852 | 0.5286123655445181 | F | F | F |

|                    |                    |                    |   |   |   |
|--------------------|--------------------|--------------------|---|---|---|
| 0.8333293577484682 | 0.8310454865245305 | 0.5281957169818696 | F | F | F |
| 0.2283736683972180 | 0.7592107964331092 | 0.4659634855339050 | F | F | F |
| 0.4999662501356283 | 0.4987274529686729 | 0.4698697869370179 | F | F | F |
| 0.7722008935562172 | 0.7369715375365402 | 0.4737760782952236 | F | F | F |
| 0.4891830112588380 | 0.7703304059322917 | 0.4737760782952236 | F | F | F |
| 0.7384810650628779 | 0.4876078378172437 | 0.4737760782952236 | F | F | F |
| 0.7611984804330393 | 0.0175420350511247 | 0.6416276341148018 | T | T | T |
| 0.9045926468703656 | 0.6531858417516573 | 0.5900648767518644 | T | T | T |
| 0.4254727590470883 | 0.6788162506643710 | 0.5821583247327800 | T | T | T |
| 0.9306727618395273 | 0.1769295991555655 | 0.5818471777645007 | T | T | T |
| 0.4032817626027998 | 0.1530152161721172 | 0.5907023368268079 | T | T | T |
| 0.2206002544531016 | 0.7588122353312708 | 0.6406871554271003 | T | T | T |
| 0.4394109122168212 | 0.9048256567445863 | 0.5908853483841535 | T | T | T |
| 0.8939011505860522 | 0.4256072572424280 | 0.5817793984705174 | T | T | T |
| 0.7814255484074937 | 0.2366382907302070 | 0.6449756558222671 | T | T | T |
| 0.8919639809406202 | 0.9305686354572238 | 0.5816638897897596 | T | T | T |
| 0.4408352174404654 | 0.4008389912122422 | 0.5904345804122350 | T | T | T |
| 0.2224660222844812 | 0.2625261798454605 | 0.6390024539465430 | T | T | T |
| 0.0141991532061299 | 0.2254761076856063 | 0.6416511763862599 | T | T | T |
| 0.6518820100297996 | 0.4400771468478524 | 0.5895858294063669 | T | T | T |
| 0.6787212276761428 | 0.8944606433254294 | 0.5822882818885451 | T | T | T |
| 0.1765307340285894 | 0.8910225630979709 | 0.5817525364342008 | T | T | T |
| 0.1549416524057725 | 0.4401317486515066 | 0.5905690164179185 | T | T | T |
| 0.5139484206403953 | 0.2215654247792373 | 0.6387365866234765 | T | T | T |
| 0.6651405491168532 | 0.6676809252940320 | 0.5865401988107750 | T | T | T |
| 0.9928761539142350 | 0.4892910248736570 | 0.6432109313586173 | T | T | T |
| 0.6679976912092014 | 0.1642538030739308 | 0.5861019170382337 | T | T | T |
| 0.4910034119374239 | 0.5109405986703259 | 0.6429710336484483 | T | T | T |
| 0.1653830441892189 | 0.1659233937655484 | 0.5861841968800187 | T | T | T |
| 0.5115026376662966 | 0.9955033510137381 | 0.6448493382021181 | T | T | T |
| 0.1669129942215407 | 0.6655455865163464 | 0.5858542914859957 | T | T | T |
| 0.2338891096379339 | 0.9822308076965939 | 0.6446347192285979 | T | T | T |
| 0.2633720009229250 | 0.5110839323450083 | 0.6389676699485266 | T | T | T |
| 0.9848195270085758 | 0.7853031486085801 | 0.6443374505328975 | T | T | T |
| 0.2277315647397131 | 0.2604833434644362 | 0.4659634882203321 | F | F | F |
| 0.5107495099301005 | 0.2271244581119447 | 0.4659634882203321 | F | F | F |
| 0.2614514102691530 | 0.5098470890666533 | 0.4659634882203321 | F | F | F |
| 0.0000000000000000 | 0.0000000000000000 | 0.4698697815641637 | F | F | F |
| 0.7367270375064264 | 0.4906145166098920 | 0.6462542725499788 | T | T | T |
| 0.7778047864446609 | 0.7425989016370169 | 0.6480444852129605 | T | T | T |
| 0.4761019062948967 | 0.7713897234376581 | 0.6494052217710857 | T | T | T |
| 0.9997225536075857 | 0.0018235772297687 | 0.6458420959164204 | T | T | T |
| 0.8159599359379399 | 0.8579122813819282 | 0.4853073788173816 | F | F | F |
| 0.3952951534094780 | 0.9363767461815229 | 0.4577430201053687 | F | F | F |

|                    |                    |                    |   |   |   |
|--------------------|--------------------|--------------------|---|---|---|
| 0.9176869787037418 | 0.1541639962793013 | 0.4492957297685578 | F | F | F |
| 0.1695994874784077 | 0.4323415158892061 | 0.4596076389699917 | F | F | F |
| 0.3245503040634432 | 0.8138816341340984 | 0.4853073788173816 | F | F | F |
| 0.6662166882857647 | 0.3936186536121724 | 0.4577430201053687 | F | F | F |
| 0.9266394692931357 | 0.9163920824521128 | 0.4492957297685578 | F | F | F |
| 0.3969640192055408 | 0.1688408520964444 | 0.4596076389699917 | F | F | F |
| 0.8593547298765358 | 0.3231158657700490 | 0.4853073788173816 | F | F | F |
| 0.9383531281826833 | 0.6649143814923804 | 0.4577430201053687 | F | F | F |
| 0.1555385218810557 | 0.9243537025546544 | 0.4492957297685578 | F | F | F |
| 0.4333689782550181 | 0.3962725226573838 | 0.4596076389699917 | F | F | F |
| 0.1839725646666253 | 0.1395426248879019 | 0.4544321788212997 | F | F | F |
| 0.6046373471950943 | 0.0610781600883072 | 0.4819965375333126 | F | F | F |
| 0.0822455252339367 | 0.8432909133153856 | 0.4904438267021192 | F | F | F |
| 0.8303330131261575 | 0.5651133903806240 | 0.4801319186686825 | F | F | F |
| 0.6753821496046513 | 0.1835732721357388 | 0.4544321788212997 | F | F | F |
| 0.3337157653823439 | 0.6038362526576577 | 0.4819965375333126 | F | F | F |
| 0.0732929777215929 | 0.0810628271425600 | 0.4904438267021192 | F | F | F |
| 0.6029684344625679 | 0.8286140541733857 | 0.4801319186686825 | F | F | F |
| 0.1405777706676758 | 0.6743389936194006 | 0.4544321788212997 | F | F | F |
| 0.0615793723615283 | 0.3325404778970764 | 0.4819965375333126 | F | F | F |
| 0.8443939819834299 | 0.0731011501850887 | 0.4904438267021192 | F | F | F |
| 0.5665635222892007 | 0.6011823367320730 | 0.4801319186686825 | F | F | F |
| 0.5157033466994037 | 0.4720642166451867 | 0.5128125034488065 | F | F | F |
| 0.9382155266378476 | 0.3935697119943384 | 0.5402222571510507 | F | F | F |
| 0.4134764846239136 | 0.1788316355844657 | 0.5490782248169097 | F | F | F |
| 0.1652727673189958 | 0.8968637606432637 | 0.5386393295024519 | F | F | F |
| 0.0115860744760994 | 0.5144800304850392 | 0.5128125034488065 | F | F | F |
| 0.6667529985908658 | 0.9365882393736200 | 0.5402222571510507 | F | F | F |
| 0.4068878560599956 | 0.4127524079384770 | 0.5490782248169097 | F | F | F |
| 0.9354527360783820 | 0.1639219592684142 | 0.5386393295024519 | F | F | F |
| 0.4726430637634564 | 0.0109106435128155 | 0.5128125034488065 | F | F | F |
| 0.3948964446492127 | 0.6647518299181101 | 0.5402222571510507 | F | F | F |
| 0.1795681442550503 | 0.4058708471200845 | 0.5490782248169097 | F | F | F |
| 0.8991394664805483 | 0.9341240613744048 | 0.5386393295024519 | F | F | F |
| 0.1502529583315635 | 0.1927478839608767 | 0.5438600605743957 | F | F | F |
| 0.7266414664239278 | 0.2718121688495998 | 0.5161713476883989 | F | F | F |
| 0.2526104716998674 | 0.4861492806533860 | 0.5077022588577265 | F | F | F |
| 0.5025193335949325 | 0.7654379243932397 | 0.5178780203333417 | F | F | F |
| 0.6558578905342074 | 0.1498255430760409 | 0.5438600605743957 | F | F | F |
| 0.0011533585709813 | 0.7254235855908746 | 0.5161713476883989 | F | F | F |
| 0.2602568251204715 | 0.2516834436997044 | 0.5077022588577265 | F | F | F |
| 0.7300539366250547 | 0.5009345144027506 | 0.5178780203333417 | F | F | F |
| 0.1938216360732028 | 0.6548814636061238 | 0.5438600605743957 | F | F | F |
| 0.2721376599440504 | 0.0002191362025528 | 0.5161713476883989 | F | F | F |

|                    |                    |                    |   |   |   |
|--------------------|--------------------|--------------------|---|---|---|
| 0.4870651881186276 | 0.2596221662899509 | 0.5077022588577265 | F | F | F |
| 0.7672916996579389 | 0.7285373424900783 | 0.5178780203333417 | F | F | F |
| 0.8249047787704471 | 0.8568373027480310 | 0.6548863378517306 | T | T | T |
| 0.8501143323690631 | 0.8049447881490973 | 0.5712326221617757 | T | T | T |
| 0.2701006248610279 | 0.7268959706063930 | 0.5981282156987443 | T | T | T |
| 0.3971676058481837 | 0.9363934101995729 | 0.6328612657311694 | T | T | T |
| 0.7444974645042175 | 0.5117078098226170 | 0.6069308053089629 | T | T | T |
| 0.9288781218602270 | 0.1479232413412155 | 0.6232186713159368 | T | T | T |
| 0.4957616206541877 | 0.2303060092988085 | 0.5964026005428202 | T | T | T |
| 0.1679199374020021 | 0.4373441938855548 | 0.6370323772224147 | T | T | T |
| 0.3230952349499308 | 0.8131456692455604 | 0.6534598906503163 | T | T | T |
| 0.3441348009519607 | 0.8489705957709403 | 0.5711929654103965 | T | T | T |
| 0.0002487343903851 | 0.2716613542538590 | 0.5983326440731931 | T | T | T |
| 0.6599851590009215 | 0.4012485973947300 | 0.6335641068087895 | T | T | T |
| 0.7425122575985689 | 0.7468926286577132 | 0.6076847122229552 | T | T | T |
| 0.9266184204573810 | 0.9345651801509244 | 0.6224190907033609 | T | T | T |
| 0.2713708932874881 | 0.4938803775776730 | 0.5966207302455261 | T | T | T |
| 0.3920192344197436 | 0.1681284871204744 | 0.6372035218341299 | T | T | T |
| 0.8492348034977184 | 0.3360625012957686 | 0.6555877991512300 | T | T | T |
| 0.8051034680771375 | 0.3434600721609121 | 0.5711300570589566 | T | T | T |
| 0.7288298543968421 | 0.9998462415516566 | 0.5984549676927131 | T | T | T |
| 0.9366944932649137 | 0.6599571297822819 | 0.6352556899172748 | T | T | T |
| 0.5105918660682532 | 0.7392169844617283 | 0.6088593722639718 | T | T | T |
| 0.1417782468740768 | 0.9268392276229437 | 0.6226290721491596 | T | T | T |
| 0.2324187795663473 | 0.2707116289012091 | 0.5967206612109159 | T | T | T |
| 0.4374523944589198 | 0.3901764482711187 | 0.6369941334088310 | T | T | T |
| 0.4795169164160136 | 0.5253865515474686 | 0.6008494745895324 | T | T | T |
| 0.1859871902835041 | 0.1364608444577718 | 0.6283556060878509 | T | T | T |
| 0.6018675538219329 | 0.0710716512206094 | 0.6557736415966242 | T | T | T |
| 0.0614065273785541 | 0.6034447151393921 | 0.5747450149720067 | T | T | T |
| 0.0719742559414482 | 0.8512688240864008 | 0.6629255307037325 | T | T | T |
| 0.5858129443328937 | 0.8208914159839907 | 0.5665399985185112 | T | T | T |
| 0.8257128604949635 | 0.5623166259099666 | 0.6533722980912545 | T | T | T |
| 0.8354447991031435 | 0.1019044713352556 | 0.5756386322220182 | T | T | T |
| 0.9906952847181915 | 0.4815500371963291 | 0.6011097721087685 | T | T | T |
| 0.6765087851438614 | 0.1886036896980035 | 0.6280708045123338 | T | T | T |
| 0.3297662573292822 | 0.5994238124465424 | 0.6550832452674611 | T | T | T |
| 0.3328480816100371 | 0.0609808929662028 | 0.5746565121565513 | T | T | T |
| 0.0785765398453708 | 0.0722655669109513 | 0.6630141678787055 | T | T | T |
| 0.5905989421872756 | 0.5876205617585009 | 0.5661927228729792 | T | T | T |
| 0.0622990426103352 | 0.8331987793101211 | 0.5756175566839078 | T | T | T |
| 0.5267918766299222 | 0.9903981969414859 | 0.6021638432716998 | T | T | T |
| 0.1347937726503504 | 0.6744779949852171 | 0.6280932865683907 | T | T | T |
| 0.0685966505398167 | 0.3293883122779915 | 0.6560465101744921 | T | T | T |

|                    |                    |                    |   |   |   |
|--------------------|--------------------|--------------------|---|---|---|
| 0.6045069947433940 | 0.3314233290311989 | 0.5746227025520737 | T | T | T |
| 0.8501928476093985 | 0.0814572677733328 | 0.6631766482625880 | T | T | T |
| 0.8197960396171614 | 0.5910367982509729 | 0.5661750009883828 | T | T | T |
| 0.5715989598298291 | 0.5999703181326587 | 0.6543191315250310 | T | T | T |
| 0.1018322674568362 | 0.0617436352503468 | 0.5756536955373193 | T | T | T |
| 0.4715060924731556 | 0.8375101178742184 | 0.6859045937711398 | T | T | T |
| 0.6048995660202904 | 0.8187187254919769 | 0.6715170434149594 | T | T | T |

**Site 2:**

In Sn O Pt

1.0000000000000000

14.6581653332033461 0.0000000000000000 0.0000000000000000

7.3189795989957736 12.7095316657975506 0.0000000000000000

-0.1539898045825509 0.0117348602194267 44.4205337057521348

In Sn O Pt

56 8 96 1

Selective dynamics

Direct

|                    |                    |                    |   |   |   |
|--------------------|--------------------|--------------------|---|---|---|
| 0.7601299999999966 | 0.0111199999999982 | 0.3212997282865118 | F | F | F |
| 0.2434165335433676 | 0.9854015590178022 | 0.3303952552037757 | F | F | F |
| 0.7751763166389409 | 0.2373103908289238 | 0.3303952552037757 | F | F | F |
| 0.7758184051208019 | 0.7360378284433793 | 0.3303952583554732 | F | F | F |
| 0.0149432086993002 | 0.2262095211845576 | 0.3212997282865118 | F | F | F |
| 0.9921246538137325 | 0.7693967045361916 | 0.3303952552037757 | F | F | F |
| 0.4928005224042380 | 0.7693966968225325 | 0.3303952583554732 | F | F | F |
| 0.0028580599244989 | 0.4978031261506217 | 0.3258474991741451 | F | F | F |
| 0.5041760321789965 | 0.9965305487398979 | 0.3258474991741451 | F | F | F |
| 0.5754695993874179 | 0.3201690636836290 | 0.3988024242875312 | F | F | F |
| 0.1000335765341589 | 0.3427603350605963 | 0.3893470124551968 | F | F | F |
| 0.5996577811357540 | 0.8418219209004363 | 0.3888098595214231 | F | F | F |
| 0.0767109653050468 | 0.8183100051456691 | 0.3986376552181525 | F | F | F |
| 0.1114318610020959 | 0.5689322078448171 | 0.3988024242875312 | F | F | F |
| 0.5634797054024645 | 0.0941582901478952 | 0.3893470124551968 | F | F | F |
| 0.5641186345741858 | 0.5925506639960076 | 0.3888098595214231 | F | F | F |
| 0.1114494334935046 | 0.0701311676366885 | 0.3986376552181525 | F | F | F |
| 0.3261319662881945 | 0.1051291103740297 | 0.3988024242875312 | F | F | F |
| 0.3492093643680292 | 0.5573702775606932 | 0.3893470124551968 | F | F | F |
| 0.8488610604088223 | 0.5573745329822160 | 0.3888098595214231 | F | F | F |
| 0.8248676130051109 | 0.1057902286404513 | 0.3986376552181525 | F | F | F |
| 0.3383792532104977 | 0.8302004322606820 | 0.3937513645347082 | F | F | F |
| 0.8367796411124147 | 0.3315350310755605 | 0.3937513645347082 | F | F | F |
| 0.7420985760889067 | 0.4866741287148670 | 0.3303952583554732 | F | F | F |

|                    |                    |                    |   |   |   |
|--------------------|--------------------|--------------------|---|---|---|
| 0.3376277839809418 | 0.3314195471817456 | 0.3942364325472383 | F | F | F |
| 0.8376409987888778 | 0.8299810709125808 | 0.3937513645347082 | F | F | F |
| 0.7637513676131474 | 0.0148511635237118 | 0.5259905198277064 | T | T | T |
| 0.9111480304762761 | 0.6506501199335544 | 0.4650234854774227 | T | T | T |
| 0.4300329557846220 | 0.6783790224960593 | 0.4559298065588814 | T | T | T |
| 0.2410046481891691 | 0.9816048045205055 | 0.5291346149982301 | T | T | T |
| 0.9368608002478553 | 0.1736273676977309 | 0.4563925769466421 | T | T | T |
| 0.4076414295389968 | 0.1531242110959204 | 0.4666981832060346 | T | T | T |
| 0.2775791912466163 | 0.4980081147846802 | 0.5258520983005641 | T | T | T |
| 0.2299626682785220 | 0.7565595489282367 | 0.5259042652198660 | T | T | T |
| 0.4458910986494086 | 0.9041835510554488 | 0.4649825204828374 | T | T | T |
| 0.8991408307623753 | 0.4227963861783308 | 0.4559251926413111 | T | T | T |
| 0.7865748552001092 | 0.2328317484262039 | 0.5289748000266208 | T | T | T |
| 0.8970792640860737 | 0.9294672939553786 | 0.4562967949222128 | T | T | T |
| 0.4470337991283441 | 0.4001253004112032 | 0.4666240206870231 | T | T | T |
| 0.2336687372489482 | 0.2695750819753069 | 0.5259794301493670 | T | T | T |
| 0.0228448580630690 | 0.2220612641980769 | 0.5260084867779922 | T | T | T |
| 0.6581617871189118 | 0.4383055510761068 | 0.4647761527723817 | T | T | T |
| 0.6859230841154369 | 0.8916219882113638 | 0.4559599816695019 | T | T | T |
| 0.9892331913817519 | 0.7791273105022498 | 0.5291808980025628 | T | T | T |
| 0.1811944803094002 | 0.8899432363764535 | 0.4563452986202420 | T | T | T |
| 0.1602502099188491 | 0.4400949153812693 | 0.4666826837489182 | T | T | T |
| 0.5055327370519270 | 0.2257665830588169 | 0.5260305970645045 | T | T | T |
| 0.6715334584218342 | 0.6645157313320091 | 0.4600347801492877 | T | T | T |
| 0.9965016744335058 | 0.4904077028359133 | 0.5264257327986605 | T | T | T |
| 0.6694849348496771 | 0.1638402499359515 | 0.4623006082971506 | T | T | T |
| 0.4986757772226195 | 0.5143241199408293 | 0.5260441773341543 | T | T | T |
| 0.1713292302797789 | 0.1672875340035984 | 0.4622708856265599 | T | T | T |
| 0.5223590720510077 | 0.9883941448526996 | 0.5263355106595464 | T | T | T |
| 0.1737992699284807 | 0.6626297736887208 | 0.4622139492366372 | T | T | T |
| 0.2318915289287986 | 0.7582958518869418 | 0.3212997282865118 | F | F | F |
| 0.5035339362280098 | 0.4978031261506217 | 0.3258474991741451 | F | F | F |
| 0.2649692708826521 | 0.5089321445234489 | 0.3212997314382093 | F | F | F |
| 0.0035676858993980 | 0.9990756731962591 | 0.3258474928707500 | F | F | F |
| 0.7453872396211814 | 0.4862959045343759 | 0.5310425952066701 | T | T | T |
| 0.7776532904029811 | 0.7368916244996829 | 0.5312955479715168 | T | T | T |
| 0.4947378442169624 | 0.7694260563498657 | 0.5312326589347106 | T | T | T |
| 0.0057686850067633 | 0.9975552192654277 | 0.5313039929816227 | T | T | T |
| 0.2312494253227371 | 0.2595683989238466 | 0.3212997314382093 | F | F | F |
| 0.5142673705564675 | 0.2262095135495770 | 0.3212997314382093 | F | F | F |
| 0.8197245306682390 | 0.8569508763088862 | 0.3438201600901110 | F | F | F |
| 0.3987081608861587 | 0.9354815458449366 | 0.3117293471016254 | F | F | F |
| 0.9209922397635992 | 0.1532890848265680 | 0.3018948934479724 | F | F | F |
| 0.1730362783713417 | 0.4314418369345745 | 0.3139001625321427 | F | F | F |



0.3283148989230753 0.8129202287039874 0.3438201600901110 F F F  
0.6696296955644030 0.3927234531479655 0.3117293471016254 F F F  
0.9299447303656834 0.9155171710171928 0.3018948934479724 F F F  
0.4004008100581657 0.1679411731758620 0.3139001625321427 F F F  
0.8631193247769602 0.3221544605376110 0.3438201600901110 F F F  
0.9417661356484075 0.6640191810841145 0.3117293471016254 F F F  
0.1588437830399343 0.9234787908990896 0.3018948934479724 F F F  
0.4368057691204541 0.3953728437525825 0.3139001625321427 F F F  
0.1873433418511681 0.1386553765605854 0.3078748193479939 F F F  
0.6083597115729162 0.0601247068673771 0.3399656321113582 F F F  
0.0860756361414658 0.8423171707979833 0.3498000846394120 F F F  
0.8340315940587928 0.5641644156990608 0.3377948166808480 F F F  
0.6787529268564683 0.1826860237720780 0.3078748193479939 F F F  
0.3374381297247666 0.6028827994856698 0.3399656321113582 F F F  
0.0771230884463421 0.0800890850007647 0.3498000846394120 F F F  
0.6066670156113929 0.8276650793790878 0.3377948166808480 F F F  
0.1439485478357412 0.6734517452805591 0.3078748193479939 F F F  
0.0653017366889372 0.3315870247342687 0.3399656321113582 F F F  
0.8482240925665394 0.0721274080750689 0.3498000846394120 F F F  
0.5702621035290605 0.6002333619871152 0.3377948166808480 F F F  
0.5198187726736379 0.4710367487921232 0.3758420117279684 F F F  
0.9426805682623609 0.3924764106726286 0.4077528311564294 F F F  
0.4180544851025232 0.1777170637495047 0.4180630728800807 F F F  
0.1697176184977991 0.8957742608203105 0.4059099647347324 F F F  
0.0157015007558172 0.5134525626218860 0.3758420117279684 F F F  
0.6712180398470551 0.9354949379856805 0.4077528311564294 F F F  
0.4114658565705795 0.4116378360625106 0.4180630728800807 F F F  
0.9398975868734993 0.1628324598200166 0.4059099647347324 F F F  
0.4767584900125641 0.0098831757007858 0.3758420117279684 F F F  
0.3993614858472370 0.6636585286003154 0.4077528311564294 F F F  
0.1841461447858563 0.4047562752544636 0.4180630728800807 F F F  
0.9035843176360459 0.9330345621793654 0.4059099647347324 F F F  
0.1547644004390776 0.1916458452052581 0.4119880130487985 F F F  
0.7307997352263129 0.2707766336215016 0.3797524253477320 F F F  
0.2566607160774623 0.4851340867038942 0.3698925933407295 F F F  
0.5066993712809946 0.7643982900759099 0.3817393573504972 F F F  
0.6603693326687292 0.1487235043712474 0.4119880130487985 F F F  
0.0053116273190454 0.7243880503595861 0.3797524253477320 F F F  
0.2643070694647278 0.2506682497746482 0.3698925933407295 F F F  
0.7342339744034376 0.4998948800842840 0.3817393573504972 F F F  
0.1983330781461632 0.6537794249032487 0.4119880130487985 F F F  
0.2762959286617175 0.9991836010246260 0.3797524253477320 F F F  
0.4911154325054667 0.2586069723533484 0.3698925933407295 F F F  
0.7714717372890760 0.7274977081085865 0.3817393573504972 F F F

|                    |                    |                    |   |   |   |
|--------------------|--------------------|--------------------|---|---|---|
| 0.8210921756318260 | 0.8493932339754635 | 0.5418306132704751 | T | T | T |
| 0.8560189517102365 | 0.8029433443977986 | 0.4436579131963201 | T | T | T |
| 0.2758085611088263 | 0.7269273259298049 | 0.4753617233605407 | T | T | T |
| 0.4087109618290373 | 0.9319878388275021 | 0.5158784332215970 | T | T | T |
| 0.7520509776745365 | 0.5105243275379894 | 0.4852323122667075 | T | T | T |
| 0.9363859421630731 | 0.1421401128741861 | 0.5045157142626663 | T | T | T |
| 0.4998031229997610 | 0.2297002689699520 | 0.4746527747309334 | T | T | T |
| 0.1583228867427434 | 0.4494571107460004 | 0.5165855499204943 | T | T | T |
| 0.3388748806416379 | 0.8136842698265457 | 0.5418486422468531 | T | T | T |
| 0.3487755941189180 | 0.8487429461216545 | 0.4434347509955168 | T | T | T |
| 0.0050109251920273 | 0.2685998367403174 | 0.4754958688680843 | T | T | T |
| 0.6683411890414553 | 0.4009211581425748 | 0.5156771053253958 | T | T | T |
| 0.7457869610946661 | 0.7440127333216494 | 0.4855513897878352 | T | T | T |
| 0.9298640919202448 | 0.9281372483620050 | 0.5044881841935664 | T | T | T |
| 0.2781027819992698 | 0.4930984017099603 | 0.4745939235867862 | T | T | T |
| 0.4010510167316327 | 0.1500584701210880 | 0.5165936813891869 | T | T | T |
| 0.8570825970837109 | 0.3304787266896589 | 0.5417338543858811 | T | T | T |
| 0.8105724838204246 | 0.3406927364323437 | 0.4435868071055732 | T | T | T |
| 0.7345464613180069 | 0.9976837503498241 | 0.4755045658387519 | T | T | T |
| 0.9396711163399768 | 0.6605016410020756 | 0.5161125976951642 | T | T | T |
| 0.5178883153340963 | 0.7379335662246229 | 0.4855093884753244 | T | T | T |
| 0.1503245236627364 | 0.9224399362352277 | 0.5044781690059246 | T | T | T |
| 0.2371277694820520 | 0.2713707819405146 | 0.4746704242630925 | T | T | T |
| 0.4575802877768448 | 0.3933821742054976 | 0.5165421562510799 | T | T | T |
| 0.4882365778744353 | 0.5269600692866588 | 0.4769808865765174 | T | T | T |
| 0.1933665528989322 | 0.1362985514511919 | 0.5114613887609523 | T | T | T |
| 0.6070059830789432 | 0.0624760301754959 | 0.5417309662194926 | T | T | T |
| 0.0674655658753943 | 0.6027702093132609 | 0.4476214977316051 | T | T | T |
| 0.0762628425490841 | 0.8479506488619363 | 0.5510503247202667 | T | T | T |
| 0.5922334442745727 | 0.8176146717048750 | 0.4373086487597574 | T | T | T |
| 0.8246063450625076 | 0.5738460243507065 | 0.5406352080586546 | T | T | T |
| 0.8386309987545392 | 0.1013531068223035 | 0.4491549037865368 | T | T | T |
| 0.9919495237670595 | 0.4812472743649202 | 0.4774561272199833 | T | T | T |
| 0.6782914460406220 | 0.1859063495003844 | 0.5115694139862673 | T | T | T |
| 0.3398031527323703 | 0.5993613254393181 | 0.5410380257806281 | T | T | T |
| 0.3370880456103639 | 0.0608413435486067 | 0.4475897646822493 | T | T | T |
| 0.0858934005938651 | 0.0677329152446815 | 0.5509305246403496 | T | T | T |
| 0.5975562022200059 | 0.5854860046769476 | 0.4371820495877252 | T | T | T |
| 0.6109888058177191 | 0.8161544876408260 | 0.5404347079340704 | T | T | T |
| 0.0673032433284202 | 0.8319568495785371 | 0.4493547076650522 | T | T | T |
| 0.5353456029493684 | 0.9849913959938186 | 0.4773476886240254 | T | T | T |
| 0.1433979331519768 | 0.6719510014704628 | 0.5114665885073021 | T | T | T |
| 0.0704272056920752 | 0.3315503065540407 | 0.5415913437259778 | T | T | T |
| 0.6104036876413222 | 0.3291416083988123 | 0.4476361049101747 | T | T | T |

|                    |                    |                    |   |   |   |
|--------------------|--------------------|--------------------|---|---|---|
| 0.8558234657021067 | 0.0772651265965609 | 0.5507243353376848 | T | T | T |
| 0.8244767205033221 | 0.5902164047683400 | 0.4371447390365816 | T | T | T |
| 0.5828834419319847 | 0.6023270302179519 | 0.5403114035124279 | T | T | T |
| 0.1087399845651452 | 0.0604144195628845 | 0.4492434861695716 | T | T | T |
| 0.3392197166881036 | 0.3313660904177676 | 0.5626164272352506 | T | T | T |

**Site 3:**

In Sn O Pt

1.0000000000000000

14.6581653332033461 0.0000000000000000 0.0000000000000000

7.3189795989957736 12.7095316657975506 0.0000000000000000

-0.1539898045825509 0.0117348602194267 44.4205337057521348

In Sn O Pt

56 8 96 1

Selective dynamics

Direct

|                    |                     |                    |   |   |   |
|--------------------|---------------------|--------------------|---|---|---|
| 0.7601299999999966 | 0.0111199999999982  | 0.3212997282865118 | F | F | F |
| 0.2434165335433676 | 0.9854015590178022  | 0.3303952552037757 | F | F | F |
| 0.7751763166389409 | 0.2373103908289238  | 0.3303952552037757 | F | F | F |
| 0.7758184051208019 | 0.7360378284433793  | 0.3303952583554732 | F | F | F |
| 0.0149432086993002 | 0.2262095211845576  | 0.3212997282865118 | F | F | F |
| 0.9921246538137325 | 0.7693967045361916  | 0.3303952552037757 | F | F | F |
| 0.4928005224042380 | 0.7693966968225325  | 0.3303952583554732 | F | F | F |
| 0.0028580599244989 | 0.4978031261506217  | 0.3258474991741451 | F | F | F |
| 0.5041760321789965 | 0.9965305487398979  | 0.3258474991741451 | F | F | F |
| 0.5754695993874179 | 0.3201690636836290  | 0.3988024242875312 | F | F | F |
| 0.1000335765341589 | 0.3427603350605963  | 0.3893470124551968 | F | F | F |
| 0.5996577811357540 | 0.8418219209004363  | 0.3888098595214231 | F | F | F |
| 0.0767109653050468 | 0.8183100051456691  | 0.3986376552181525 | F | F | F |
| 0.1114318610020959 | 0.56893220784448171 | 0.3988024242875312 | F | F | F |
| 0.5634797054024645 | 0.0941582901478952  | 0.3893470124551968 | F | F | F |
| 0.5641186345741858 | 0.5925506639960076  | 0.3888098595214231 | F | F | F |
| 0.1114494334935046 | 0.0701311676366885  | 0.3986376552181525 | F | F | F |
| 0.3261319662881945 | 0.1051291103740297  | 0.3988024242875312 | F | F | F |
| 0.3492093643680292 | 0.5573702775606932  | 0.3893470124551968 | F | F | F |
| 0.8488610604088223 | 0.5573745329822160  | 0.3888098595214231 | F | F | F |
| 0.8248676130051109 | 0.1057902286404513  | 0.3986376552181525 | F | F | F |
| 0.3383792532104977 | 0.8302004322606820  | 0.3937513645347082 | F | F | F |
| 0.8367796411124147 | 0.3315350310755605  | 0.3937513645347082 | F | F | F |
| 0.7420985760889067 | 0.4866741287148670  | 0.3303952583554732 | F | F | F |
| 0.3376277839809418 | 0.3314195471817456  | 0.3942364325472383 | F | F | F |
| 0.8376409987888778 | 0.8299810709125808  | 0.3937513645347082 | F | F | F |
| 0.7651759955176360 | 0.0149781581881053  | 0.5257929000092900 | T | T | T |

|                    |                    |                    |   |   |   |
|--------------------|--------------------|--------------------|---|---|---|
| 0.9113714428280999 | 0.6504473769610321 | 0.4657428765799633 | T | T | T |
| 0.4308343209463960 | 0.6767213125596149 | 0.4565288319303840 | T | T | T |
| 0.2459921468085054 | 0.9802800037635625 | 0.5329189730939632 | T | T | T |
| 0.9355930399706832 | 0.1749072868747705 | 0.4564073116207931 | T | T | T |
| 0.4079230239420050 | 0.1530502462456964 | 0.4663128125102343 | T | T | T |
| 0.2733944443558132 | 0.5064816479805097 | 0.5246002923694874 | T | T | T |
| 0.2111326402235781 | 0.7665470293045753 | 0.5224302862715490 | T | T | T |
| 0.4456467328053949 | 0.9037878634148327 | 0.4655957044387460 | T | T | T |
| 0.9013559613017342 | 0.4222236397524749 | 0.4562541675124115 | T | T | T |
| 0.7868282361383966 | 0.2351142428614726 | 0.5299843537483456 | T | T | T |
| 0.8968222346317978 | 0.9290119498543127 | 0.4561136568908341 | T | T | T |
| 0.4463578375353682 | 0.4004084408153763 | 0.4664069676919382 | T | T | T |
| 0.2284536828705091 | 0.2611179134846338 | 0.5230971701300277 | T | T | T |
| 0.0227466092496192 | 0.2212999506799358 | 0.5262959275985675 | T | T | T |
| 0.6584027299268692 | 0.4384860610200436 | 0.4659397414732908 | T | T | T |
| 0.6846802568217391 | 0.8925762962043171 | 0.4564022616856555 | T | T | T |
| 0.9839959315583392 | 0.7817315279965026 | 0.5292604903369864 | T | T | T |
| 0.1822569432231849 | 0.8908745277925951 | 0.4561106124520038 | T | T | T |
| 0.1618025812863248 | 0.4385092538710626 | 0.4665941827348049 | T | T | T |
| 0.5194425877508266 | 0.2203463964628197 | 0.5223171022087395 | T | T | T |
| 0.6723325546232801 | 0.6640008381610385 | 0.4605951245041400 | T | T | T |
| 0.0025553909106639 | 0.4892454752110201 | 0.5281001318925905 | T | T | T |
| 0.6724562710723809 | 0.1634933996497173 | 0.4611547864164526 | T | T | T |
| 0.4994486373008911 | 0.5102742367532240 | 0.5286764738600725 | T | T | T |
| 0.1709403357911099 | 0.1640563621933363 | 0.4616216852670928 | T | T | T |
| 0.5171811339527497 | 0.9944975512565082 | 0.5278420667917585 | T | T | T |
| 0.1718797326200592 | 0.6631200362282571 | 0.4608907320230501 | T | T | T |
| 0.2318915289287986 | 0.7582958518869418 | 0.3212997282865118 | F | F | F |
| 0.5035339362280098 | 0.4978031261506217 | 0.3258474991741451 | F | F | F |
| 0.2649692708826521 | 0.5089321445234489 | 0.3212997314382093 | F | F | F |
| 0.0035676858993980 | 0.9990756731962591 | 0.3258474928707500 | F | F | F |
| 0.7495700149996739 | 0.4870613981305532 | 0.5318181767201628 | T | T | T |
| 0.7789492019786226 | 0.7356235959211467 | 0.5325058266381715 | T | T | T |
| 0.5064399551943430 | 0.7685724777817275 | 0.5327168933395228 | T | T | T |
| 0.0027084493470738 | 0.0018568914663031 | 0.5319433935831430 | T | T | T |
| 0.2312494253227371 | 0.2595683989238466 | 0.3212997314382093 | F | F | F |
| 0.5142673705564675 | 0.2262095135495770 | 0.3212997314382093 | F | F | F |
| 0.8197245306682390 | 0.8569508763088862 | 0.3438201600901110 | F | F | F |
| 0.3987081608861587 | 0.9354815458449366 | 0.3117293471016254 | F | F | F |
| 0.9209922397635992 | 0.1532890848265680 | 0.3018948934479724 | F | F | F |
| 0.1730362783713417 | 0.4314418369345745 | 0.3139001625321427 | F | F | F |
| 0.3283148989230753 | 0.8129202287039874 | 0.3438201600901110 | F | F | F |
| 0.6696296955644030 | 0.3927234531479655 | 0.3117293471016254 | F | F | F |
| 0.9299447303656834 | 0.9155171710171928 | 0.3018948934479724 | F | F | F |

|                    |                    |                    |   |   |   |
|--------------------|--------------------|--------------------|---|---|---|
| 0.4004008100581657 | 0.1679411731758620 | 0.3139001625321427 | F | F | F |
| 0.8631193247769602 | 0.3221544605376110 | 0.3438201600901110 | F | F | F |
| 0.9417661356484075 | 0.6640191810841145 | 0.3117293471016254 | F | F | F |
| 0.1588437830399343 | 0.9234787908990896 | 0.3018948934479724 | F | F | F |
| 0.4368057691204541 | 0.3953728437525825 | 0.3139001625321427 | F | F | F |
| 0.1873433418511681 | 0.1386553765605854 | 0.3078748193479939 | F | F | F |
| 0.6083597115729162 | 0.0601247068673771 | 0.3399656321113582 | F | F | F |
| 0.0860756361414658 | 0.8423171707979833 | 0.3498000846394120 | F | F | F |
| 0.8340315940587928 | 0.5641644156990608 | 0.3377948166808480 | F | F | F |
| 0.6787529268564683 | 0.1826860237720780 | 0.3078748193479939 | F | F | F |
| 0.3374381297247666 | 0.6028827994856698 | 0.3399656321113582 | F | F | F |
| 0.0771230884463421 | 0.0800890850007647 | 0.3498000846394120 | F | F | F |
| 0.6066670156113929 | 0.8276650793790878 | 0.3377948166808480 | F | F | F |
| 0.1439485478357412 | 0.6734517452805591 | 0.3078748193479939 | F | F | F |
| 0.0653017366889372 | 0.3315870247342687 | 0.3399656321113582 | F | F | F |
| 0.8482240925665394 | 0.0721274080750689 | 0.3498000846394120 | F | F | F |
| 0.5702621035290605 | 0.6002333619871152 | 0.3377948166808480 | F | F | F |
| 0.5198187726736379 | 0.4710367487921232 | 0.3758420117279684 | F | F | F |
| 0.9426805682623609 | 0.3924764106726286 | 0.4077528311564294 | F | F | F |
| 0.4180544851025232 | 0.1777170637495047 | 0.4180630728800807 | F | F | F |
| 0.1697176184977991 | 0.8957742608203105 | 0.4059099647347324 | F | F | F |
| 0.0157015007558172 | 0.5134525626218860 | 0.3758420117279684 | F | F | F |
| 0.6712180398470551 | 0.9354949379856805 | 0.4077528311564294 | F | F | F |
| 0.4114658565705795 | 0.4116378360625106 | 0.4180630728800807 | F | F | F |
| 0.9398975868734993 | 0.1628324598200166 | 0.4059099647347324 | F | F | F |
| 0.4767584900125641 | 0.0098831757007858 | 0.3758420117279684 | F | F | F |
| 0.3993614858472370 | 0.6636585286003154 | 0.4077528311564294 | F | F | F |
| 0.1841461447858563 | 0.4047562752544636 | 0.4180630728800807 | F | F | F |
| 0.9035843176360459 | 0.9330345621793654 | 0.4059099647347324 | F | F | F |
| 0.1547644004390776 | 0.1916458452052581 | 0.4119880130487985 | F | F | F |
| 0.7307997352263129 | 0.2707766336215016 | 0.3797524253477320 | F | F | F |
| 0.2566607160774623 | 0.4851340867038942 | 0.3698925933407295 | F | F | F |
| 0.5066993712809946 | 0.7643982900759099 | 0.3817393573504972 | F | F | F |
| 0.6603693326687292 | 0.1487235043712474 | 0.4119880130487985 | F | F | F |
| 0.0053116273190454 | 0.7243880503595861 | 0.3797524253477320 | F | F | F |
| 0.2643070694647278 | 0.2506682497746482 | 0.3698925933407295 | F | F | F |
| 0.7342339744034376 | 0.4998948800842840 | 0.3817393573504972 | F | F | F |
| 0.1983330781461632 | 0.6537794249032487 | 0.4119880130487985 | F | F | F |
| 0.2762959286617175 | 0.9991836010246260 | 0.3797524253477320 | F | F | F |
| 0.4911154325054667 | 0.2586069723533484 | 0.3698925933407295 | F | F | F |
| 0.7714717372890760 | 0.7274977081085865 | 0.3817393573504972 | F | F | F |
| 0.8192010517031060 | 0.8516314554458353 | 0.5418426088927583 | T | T | T |
| 0.8552004403073269 | 0.8029003557610834 | 0.4439652436242253 | T | T | T |
| 0.2738690118171032 | 0.7267100410394194 | 0.4748877096198820 | T | T | T |

|                    |                    |                    |   |   |   |
|--------------------|--------------------|--------------------|---|---|---|
| 0.4073164955386255 | 0.9321593563846968 | 0.5155940728673173 | T | T | T |
| 0.7538029681823992 | 0.5089594529923998 | 0.4858498837357816 | T | T | T |
| 0.9365360590330376 | 0.1429467426349439 | 0.5049602218680680 | T | T | T |
| 0.5018646244682047 | 0.2281686300781315 | 0.4729218344143039 | T | T | T |
| 0.1761748706402093 | 0.4351023144346989 | 0.5207892925421901 | T | T | T |
| 0.3694105159243081 | 0.8252391726532624 | 0.5576806955563016 | T | T | T |
| 0.3496783949184755 | 0.8470630259194778 | 0.4439313251478472 | T | T | T |
| 0.0061166444741707 | 0.2678919982468019 | 0.4758066063851189 | T | T | T |
| 0.6663417305224387 | 0.4024762129699527 | 0.5177719291039674 | T | T | T |
| 0.7463475253460305 | 0.7435550146512783 | 0.4863472678526528 | T | T | T |
| 0.9299534572187511 | 0.9306470651250642 | 0.5042121611484566 | T | T | T |
| 0.2767373719309094 | 0.4945850853590140 | 0.4742973577832141 | T | T | T |
| 0.3979386073022178 | 0.1668811276251882 | 0.5202204723858267 | T | T | T |
| 0.8588941104125810 | 0.3307861433518482 | 0.5421011805693201 | T | T | T |
| 0.8106411268756245 | 0.3411805838253029 | 0.4440306687712244 | T | T | T |
| 0.7340235934894273 | 0.9984290276640314 | 0.4755551152557407 | T | T | T |
| 0.9434618278226977 | 0.6592035173892717 | 0.5164801560706713 | T | T | T |
| 0.5187555813141365 | 0.7375024042793054 | 0.4865757025693335 | T | T | T |
| 0.1562292711867951 | 0.9250162906430118 | 0.5054106387704291 | T | T | T |
| 0.2373755667811215 | 0.2692266023505541 | 0.4737003291984072 | T | T | T |
| 0.4466071595056712 | 0.3886146562973936 | 0.5179377715274620 | T | T | T |
| 0.4861087130874822 | 0.5260829897926043 | 0.4795042976615711 | T | T | T |
| 0.1936613109229665 | 0.1325368611853667 | 0.5112420972694471 | T | T | T |
| 0.6070344572259158 | 0.0664906298365844 | 0.5420173555848321 | T | T | T |
| 0.0671496855795262 | 0.6016647270122368 | 0.4478226720197538 | T | T | T |
| 0.0681846760527898 | 0.8521318026036584 | 0.5507286813216857 | T | T | T |
| 0.5921519736326285 | 0.8182714926766308 | 0.4379363667944641 | T | T | T |
| 0.8313791843452295 | 0.5691507494278443 | 0.5416292517739949 | T | T | T |
| 0.8399212374338662 | 0.1006794119508557 | 0.4491062825977014 | T | T | T |
| 0.9978585150802514 | 0.4780790463688802 | 0.4789764066468692 | T | T | T |
| 0.6823224690614844 | 0.1869198101672298 | 0.5101732450721684 | T | T | T |
| 0.3566311924500730 | 0.5517713139645827 | 0.5573148365723558 | T | T | T |
| 0.3375781757034646 | 0.0601874189400375 | 0.4478186858205132 | T | T | T |
| 0.0857073779100821 | 0.0678299707685123 | 0.5520639025337647 | T | T | T |
| 0.5963923518593663 | 0.5850475315042487 | 0.4380438117678656 | T | T | T |
| 0.6110732842356941 | 0.8229692412566491 | 0.5418782089298246 | T | T | T |
| 0.0675261489613717 | 0.8326551224863400 | 0.4497828951863206 | T | T | T |
| 0.5326372121867630 | 0.9887150534397938 | 0.4787393559699925 | T | T | T |
| 0.1418450123432149 | 0.6700685451738975 | 0.5109842979759334 | T | T | T |
| 0.0739930613081553 | 0.3284116866855031 | 0.5425841800330214 | T | T | T |
| 0.6091737811705277 | 0.3317651697372227 | 0.4479557301993994 | T | T | T |
| 0.8531885068044991 | 0.0801785457049914 | 0.5513762595639051 | T | T | T |
| 0.8265362158335017 | 0.5889104886910160 | 0.4379136671921261 | T | T | T |
| 0.5943036600378181 | 0.6032248923123744 | 0.5420902131923689 | T | T | T |

0.1068452670566819 0.0601022899454664 0.4492914317705137 T T T  
0.3620135134290740 0.6883680094495583 0.5583176521287918 T T T

**Site 4:**

In Sn O Pt

1.0000000000000000

14.6581653332033461 0.0000000000000000 0.0000000000000000

7.3189795989957736 12.7095316657975506 0.0000000000000000

-0.1539898045825509 0.0117348602194267 44.4205337057521348

In Sn O Pt

56 8 96 1

Selective dynamics

Direct

0.7601299999999966 0.0111199999999982 0.3212997282865118 F F F  
0.2434165335433676 0.9854015590178022 0.3303952552037757 F F F  
0.7751763166389409 0.2373103908289238 0.3303952552037757 F F F  
0.7758184051208019 0.7360378284433793 0.3303952583554732 F F F  
0.0149432086993002 0.2262095211845576 0.3212997282865118 F F F  
0.9921246538137325 0.7693967045361916 0.3303952552037757 F F F  
0.4928005224042380 0.7693966968225325 0.3303952583554732 F F F  
0.0028580599244989 0.4978031261506217 0.3258474991741451 F F F  
0.5041760321789965 0.9965305487398979 0.3258474991741451 F F F  
0.5754695993874179 0.3201690636836290 0.3988024242875312 F F F  
0.1000335765341589 0.3427603350605963 0.3893470124551968 F F F  
0.5996577811357540 0.8418219209004363 0.3888098595214231 F F F  
0.0767109653050468 0.8183100051456691 0.3986376552181525 F F F  
0.1114318610020959 0.5689322078448171 0.3988024242875312 F F F  
0.5634797054024645 0.0941582901478952 0.3893470124551968 F F F  
0.5641186345741858 0.5925506639960076 0.3888098595214231 F F F  
0.1114494334935046 0.0701311676366885 0.3986376552181525 F F F  
0.3261319662881945 0.1051291103740297 0.3988024242875312 F F F  
0.3492093643680292 0.5573702775606932 0.3893470124551968 F F F  
0.8488610604088223 0.5573745329822160 0.3888098595214231 F F F  
0.8248676130051109 0.1057902286404513 0.3986376552181525 F F F  
0.3383792532104977 0.8302004322606820 0.3937513645347082 F F F  
0.8367796411124147 0.3315350310755605 0.3937513645347082 F F F  
0.7420985760889067 0.4866741287148670 0.3303952583554732 F F F  
0.3376277839809418 0.3314195471817456 0.3942364325472383 F F F  
0.8376409987888778 0.8299810709125808 0.3937513645347082 F F F  
0.7641691486673508 0.0125390006253327 0.5257175888638148 T T T  
0.9122107054520889 0.6505623736947503 0.4655414516761064 T T T  
0.4298924365359854 0.6770744233360981 0.4563656269183029 T T T

|                    |                    |                    |   |   |   |
|--------------------|--------------------|--------------------|---|---|---|
| 0.2559125786415192 | 0.9751934721045737 | 0.5325820264548404 | T | T | T |
| 0.9348894137539524 | 0.1745438421856601 | 0.4563004558698743 | T | T | T |
| 0.4076813052437940 | 0.1532425960928834 | 0.4664165102427604 | T | T | T |
| 0.2695380055949773 | 0.5110730717984640 | 0.5230204019769353 | T | T | T |
| 0.2308820542948729 | 0.7585248863523072 | 0.5266206157196808 | T | T | T |
| 0.4466316295849538 | 0.9033934939304381 | 0.4650195330396161 | T | T | T |
| 0.8999218381546386 | 0.4231331769200041 | 0.4560831870078617 | T | T | T |
| 0.7871323117266562 | 0.2319623185142995 | 0.5298270704192433 | T | T | T |
| 0.8971183473645907 | 0.9285997264935707 | 0.4561382358219060 | T | T | T |
| 0.4461079005937322 | 0.4005012968881590 | 0.4665381531191887 | T | T | T |
| 0.2276674816650540 | 0.2590069909178301 | 0.5229691034220562 | T | T | T |
| 0.0173839196976561 | 0.2272374455193780 | 0.5251111171258328 | T | T | T |
| 0.6578339098406601 | 0.4376626896174713 | 0.4656740997747310 | T | T | T |
| 0.6853325827857999 | 0.8919145841988396 | 0.4562102733172580 | T | T | T |
| 0.9883805744662084 | 0.7792432468377958 | 0.5298841355635724 | T | T | T |
| 0.1815484583829913 | 0.8914182131364626 | 0.4573575636560850 | T | T | T |
| 0.1616753764575881 | 0.4383882883283931 | 0.4665033226608991 | T | T | T |
| 0.5176343361291975 | 0.2201792245799570 | 0.5229768098317771 | T | T | T |
| 0.6727084902179000 | 0.6632325000950079 | 0.4600367610377301 | T | T | T |
| 0.0011689078851221 | 0.4903160586682141 | 0.5276092523970569 | T | T | T |
| 0.6717149602620934 | 0.1629898797612839 | 0.4613288130536694 | T | T | T |
| 0.4973260678657005 | 0.5107227616115637 | 0.5281470450059146 | T | T | T |
| 0.1704695168532521 | 0.1634232579951123 | 0.4615179055540022 | T | T | T |
| 0.5205807858249605 | 0.9903717207787991 | 0.5274719834257765 | T | T | T |
| 0.1720252601130896 | 0.6658901966540782 | 0.4614832976152588 | T | T | T |
| 0.2318915289287986 | 0.7582958518869418 | 0.3212997282865118 | F | F | F |
| 0.5035339362280098 | 0.4978031261506217 | 0.3258474991741451 | F | F | F |
| 0.2649692708826521 | 0.5089321445234489 | 0.3212997314382093 | F | F | F |
| 0.0035676858993980 | 0.9990756731962591 | 0.3258474928707500 | F | F | F |
| 0.7450095021545005 | 0.4867018403887028 | 0.5314834440154141 | T | T | T |
| 0.7785005609591116 | 0.7348076697052466 | 0.5318861198532486 | T | T | T |
| 0.5020292082959420 | 0.7637913667867676 | 0.5309454221947454 | T | T | T |
| 0.0022759137191303 | 0.9969280458092615 | 0.5313434525115638 | T | T | T |
| 0.2312494253227371 | 0.2595683989238466 | 0.3212997314382093 | F | F | F |
| 0.5142673705564675 | 0.2262095135495770 | 0.3212997314382093 | F | F | F |
| 0.8197245306682390 | 0.8569508763088862 | 0.3438201600901110 | F | F | F |
| 0.3987081608861587 | 0.9354815458449366 | 0.3117293471016254 | F | F | F |
| 0.9209922397635992 | 0.1532890848265680 | 0.3018948934479724 | F | F | F |
| 0.1730362783713417 | 0.4314418369345745 | 0.3139001625321427 | F | F | F |
| 0.3283148989230753 | 0.8129202287039874 | 0.3438201600901110 | F | F | F |
| 0.6696296955644030 | 0.3927234531479655 | 0.3117293471016254 | F | F | F |
| 0.9299447303656834 | 0.9155171710171928 | 0.3018948934479724 | F | F | F |
| 0.4004008100581657 | 0.1679411731758620 | 0.3139001625321427 | F | F | F |
| 0.8631193247769602 | 0.3221544605376110 | 0.3438201600901110 | F | F | F |



|                    |                    |                    |   |   |   |
|--------------------|--------------------|--------------------|---|---|---|
| 0.9417661356484075 | 0.6640191810841145 | 0.3117293471016254 | F | F | F |
| 0.1588437830399343 | 0.9234787908990896 | 0.3018948934479724 | F | F | F |
| 0.4368057691204541 | 0.3953728437525825 | 0.3139001625321427 | F | F | F |
| 0.1873433418511681 | 0.1386553765605854 | 0.3078748193479939 | F | F | F |
| 0.6083597115729162 | 0.0601247068673771 | 0.3399656321113582 | F | F | F |
| 0.0860756361414658 | 0.8423171707979833 | 0.3498000846394120 | F | F | F |
| 0.8340315940587928 | 0.5641644156990608 | 0.3377948166808480 | F | F | F |
| 0.6787529268564683 | 0.1826860237720780 | 0.3078748193479939 | F | F | F |
| 0.3374381297247666 | 0.6028827994856698 | 0.3399656321113582 | F | F | F |
| 0.0771230884463421 | 0.0800890850007647 | 0.3498000846394120 | F | F | F |
| 0.6066670156113929 | 0.8276650793790878 | 0.3377948166808480 | F | F | F |
| 0.1439485478357412 | 0.6734517452805591 | 0.3078748193479939 | F | F | F |
| 0.0653017366889372 | 0.3315870247342687 | 0.3399656321113582 | F | F | F |
| 0.8482240925665394 | 0.0721274080750689 | 0.3498000846394120 | F | F | F |
| 0.5702621035290605 | 0.6002333619871152 | 0.3377948166808480 | F | F | F |
| 0.5198187726736379 | 0.4710367487921232 | 0.3758420117279684 | F | F | F |
| 0.9426805682623609 | 0.3924764106726286 | 0.4077528311564294 | F | F | F |
| 0.4180544851025232 | 0.1777170637495047 | 0.4180630728800807 | F | F | F |
| 0.1697176184977991 | 0.8957742608203105 | 0.4059099647347324 | F | F | F |
| 0.0157015007558172 | 0.5134525626218860 | 0.3758420117279684 | F | F | F |
| 0.6712180398470551 | 0.9354949379856805 | 0.4077528311564294 | F | F | F |
| 0.4114658565705795 | 0.4116378360625106 | 0.4180630728800807 | F | F | F |
| 0.9398975868734993 | 0.1628324598200166 | 0.4059099647347324 | F | F | F |
| 0.4767584900125641 | 0.0098831757007858 | 0.3758420117279684 | F | F | F |
| 0.3993614858472370 | 0.6636585286003154 | 0.4077528311564294 | F | F | F |
| 0.1841461447858563 | 0.4047562752544636 | 0.4180630728800807 | F | F | F |
| 0.9035843176360459 | 0.9330345621793654 | 0.4059099647347324 | F | F | F |
| 0.1547644004390776 | 0.1916458452052581 | 0.4119880130487985 | F | F | F |
| 0.7307997352263129 | 0.2707766336215016 | 0.3797524253477320 | F | F | F |
| 0.2566607160774623 | 0.4851340867038942 | 0.3698925933407295 | F | F | F |
| 0.5066993712809946 | 0.7643982900759099 | 0.3817393573504972 | F | F | F |
| 0.6603693326687292 | 0.1487235043712474 | 0.4119880130487985 | F | F | F |
| 0.0053116273190454 | 0.7243880503595861 | 0.3797524253477320 | F | F | F |
| 0.2643070694647278 | 0.2506682497746482 | 0.3698925933407295 | F | F | F |
| 0.7342339744034376 | 0.4998948800842840 | 0.3817393573504972 | F | F | F |
| 0.1983330781461632 | 0.6537794249032487 | 0.4119880130487985 | F | F | F |
| 0.2762959286617175 | 0.9991836010246260 | 0.3797524253477320 | F | F | F |
| 0.4911154325054667 | 0.2586069723533484 | 0.3698925933407295 | F | F | F |
| 0.7714717372890760 | 0.7274977081085865 | 0.3817393573504972 | F | F | F |
| 0.8205265325407659 | 0.8490629231195663 | 0.5418195953595444 | T | T | T |
| 0.8558187207677256 | 0.8027570114100849 | 0.4437967072502078 | T | T | T |
| 0.2749182701931869 | 0.7284864372883973 | 0.4762800617974592 | T | T | T |
| 0.4135289049312316 | 0.9301955207395295 | 0.5155861886895263 | T | T | T |
| 0.7521227344712407 | 0.5094625900059466 | 0.4856435651639767 | T | T | T |

|                    |                    |                    |   |   |   |
|--------------------|--------------------|--------------------|---|---|---|
| 0.9366090508846865 | 0.1407265126246023 | 0.5046442391771945 | T | T | T |
| 0.5002292043335411 | 0.2300559005849572 | 0.4736104686260810 | T | T | T |
| 0.1761773354095637 | 0.4344407792538960 | 0.5201511823746482 | T | T | T |
| 0.3509727514176850 | 0.8005685083764158 | 0.5403758016409966 | T | T | T |
| 0.3488602826273614 | 0.8478573045638281 | 0.4439402406818978 | T | T | T |
| 0.0046044604356489 | 0.2690596540854048 | 0.4752664124439026 | T | T | T |
| 0.6656473570176128 | 0.3991100916479433 | 0.5167446421947343 | T | T | T |
| 0.7471583374962816 | 0.7430250701128205 | 0.4858648400927233 | T | T | T |
| 0.9305563431056980 | 0.9268728617020032 | 0.5043880152560386 | T | T | T |
| 0.2768453021450664 | 0.4945532560620222 | 0.4735764528591475 | T | T | T |
| 0.3975274678566589 | 0.1647122510966368 | 0.5201968081368710 | T | T | T |
| 0.8556054586460430 | 0.3319265696311254 | 0.5417588168039665 | T | T | T |
| 0.8102534403341590 | 0.3411183066357135 | 0.4438654236421408 | T | T | T |
| 0.7343168693102606 | 0.9974939704906874 | 0.4755897488944962 | T | T | T |
| 0.9435001314342519 | 0.6584554032068027 | 0.5166553177882789 | T | T | T |
| 0.5204496371487859 | 0.7365290596827185 | 0.4852190795200348 | T | T | T |
| 0.1521949876838901 | 0.9282604730504052 | 0.5074461712994386 | T | T | T |
| 0.2370400004912957 | 0.2684578247497657 | 0.4736310621829024 | T | T | T |
| 0.4433496298004785 | 0.3896884023708379 | 0.5205189897059559 | T | T | T |
| 0.4856450842758100 | 0.5255093798406795 | 0.4789919277957024 | T | T | T |
| 0.1881803560627909 | 0.1321125786639719 | 0.5107741472003907 | T | T | T |
| 0.6062293900070503 | 0.0646513865113416 | 0.5422993478996316 | T | T | T |
| 0.0681003731533462 | 0.6022404306216192 | 0.4479737629669318 | T | T | T |
| 0.0758524178249730 | 0.8479756548843861 | 0.5513968899140845 | T | T | T |
| 0.5928532421162680 | 0.8178489239499748 | 0.4376554512092571 | T | T | T |
| 0.8273447953383408 | 0.5713143055234635 | 0.5408164241495301 | T | T | T |
| 0.8393388301350977 | 0.1002251595933706 | 0.4491078541847250 | T | T | T |
| 0.9969984991646684 | 0.4786462001092758 | 0.4785308498487862 | T | T | T |
| 0.6805977153270006 | 0.1850702574695949 | 0.5103321131739913 | T | T | T |
| 0.3367853770719628 | 0.5985386425822226 | 0.5429515087682542 | T | T | T |
| 0.3375539941288418 | 0.0600159923987259 | 0.4478402614262685 | T | T | T |
| 0.0421200154521183 | 0.0968816029625617 | 0.5567547640713238 | T | T | T |
| 0.5965565165225581 | 0.5840608838608607 | 0.4377852832408239 | T | T | T |
| 0.6117619591779853 | 0.8159732862350305 | 0.5411468198017265 | T | T | T |
| 0.0675207496070967 | 0.8339614048367979 | 0.4496337827906544 | T | T | T |
| 0.5332882280493932 | 0.9888344309763980 | 0.4782467594055236 | T | T | T |
| 0.1420632393537578 | 0.6749498069057230 | 0.5108328623760242 | T | T | T |
| 0.0722560219615191 | 0.3303037424727444 | 0.5420674704516668 | T | T | T |
| 0.6092097104605196 | 0.3302673527350610 | 0.4479024321863275 | T | T | T |
| 0.8516712470808718 | 0.0760368446418530 | 0.5508133036057323 | T | T | T |
| 0.8266032396849292 | 0.5890095591678808 | 0.4377086002162877 | T | T | T |
| 0.5839926679512666 | 0.5997735111215577 | 0.5411435750978570 | T | T | T |
| 0.1062834192612852 | 0.0598416787417873 | 0.4492847572612240 | T | T | T |
| 0.1638048405936819 | 0.0406567907700325 | 0.5831132383008896 | T | T | T |

**Site 5:**

In Sn O Pt

1.0000000000000000

14.6581653332033461 0.0000000000000000 0.0000000000000000  
7.3189795989957736 12.7095316657975506 0.0000000000000000  
-0.1539898045825509 0.0117348602194267 44.4205337057521348

In Sn O Pt

56 8 96 1

Selective dynamics

Direct

|                    |                    |                    |   |   |   |
|--------------------|--------------------|--------------------|---|---|---|
| 0.7601299999999966 | 0.0111199999999982 | 0.3212997282865118 | F | F | F |
| 0.2434165335433676 | 0.9854015590178022 | 0.3303952552037757 | F | F | F |
| 0.7751763166389409 | 0.2373103908289238 | 0.3303952552037757 | F | F | F |
| 0.7758184051208019 | 0.7360378284433793 | 0.3303952583554732 | F | F | F |
| 0.0149432086993002 | 0.2262095211845576 | 0.3212997282865118 | F | F | F |
| 0.9921246538137325 | 0.7693967045361916 | 0.3303952552037757 | F | F | F |
| 0.4928005224042380 | 0.7693966968225325 | 0.3303952583554732 | F | F | F |
| 0.0028580599244989 | 0.4978031261506217 | 0.3258474991741451 | F | F | F |
| 0.5041760321789965 | 0.9965305487398979 | 0.3258474991741451 | F | F | F |
| 0.5754695993874179 | 0.3201690636836290 | 0.3988024242875312 | F | F | F |
| 0.1000335765341589 | 0.3427603350605963 | 0.3893470124551968 | F | F | F |
| 0.5996577811357540 | 0.8418219209004363 | 0.3888098595214231 | F | F | F |
| 0.0767109653050468 | 0.8183100051456691 | 0.3986376552181525 | F | F | F |
| 0.1114318610020959 | 0.5689322078448171 | 0.3988024242875312 | F | F | F |
| 0.5634797054024645 | 0.0941582901478952 | 0.3893470124551968 | F | F | F |
| 0.5641186345741858 | 0.5925506639960076 | 0.3888098595214231 | F | F | F |
| 0.1114494334935046 | 0.0701311676366885 | 0.3986376552181525 | F | F | F |
| 0.3261319662881945 | 0.1051291103740297 | 0.3988024242875312 | F | F | F |
| 0.3492093643680292 | 0.5573702775606932 | 0.3893470124551968 | F | F | F |
| 0.8488610604088223 | 0.5573745329822160 | 0.3888098595214231 | F | F | F |
| 0.8248676130051109 | 0.1057902286404513 | 0.3986376552181525 | F | F | F |
| 0.3383792532104977 | 0.8302004322606820 | 0.3937513645347082 | F | F | F |
| 0.8367796411124147 | 0.3315350310755605 | 0.3937513645347082 | F | F | F |
| 0.7420985760889067 | 0.4866741287148670 | 0.3303952583554732 | F | F | F |
| 0.3376277839809418 | 0.3314195471817456 | 0.3942364325472383 | F | F | F |
| 0.8376409987888778 | 0.8299810709125808 | 0.3937513645347082 | F | F | F |
| 0.7682724150875163 | 0.0120135242094843 | 0.5254106376270072 | T | T | T |
| 0.9111551573291078 | 0.6506034211733152 | 0.4654540375633897 | T | T | T |
| 0.4306024227654488 | 0.6741358128982091 | 0.4571466007377056 | T | T | T |
| 0.2419095151493092 | 0.9808349254632530 | 0.5295849286886113 | T | T | T |
| 0.9333247269271330 | 0.1751630912458810 | 0.4574998979021333 | T | T | T |

|                    |                    |                    |   |   |   |
|--------------------|--------------------|--------------------|---|---|---|
| 0.4104150981641744 | 0.1553303077326076 | 0.4672978678747930 | T | T | T |
| 0.2674996152582448 | 0.5148685848529713 | 0.5211004959277055 | T | T | T |
| 0.2323207285557226 | 0.7570052705476760 | 0.5259823917387505 | T | T | T |
| 0.4444502468834358 | 0.9050163301780201 | 0.4657191308409886 | T | T | T |
| 0.8997623640573319 | 0.4229649326060943 | 0.4560474994142825 | T | T | T |
| 0.7743348422919798 | 0.2393076477626686 | 0.5361169249122255 | T | T | T |
| 0.8967525261763555 | 0.9284226883190388 | 0.4560854150123278 | T | T | T |
| 0.4460403224240154 | 0.4002767670725396 | 0.4664544915111517 | T | T | T |
| 0.2299862285702519 | 0.2615360672954101 | 0.5224506806383512 | T | T | T |
| 0.0173694482702899 | 0.2241507231817753 | 0.5260732350715628 | T | T | T |
| 0.6571017146710731 | 0.4384273073072791 | 0.4649519388343054 | T | T | T |
| 0.6845740460771941 | 0.8921211395641448 | 0.4562296451351055 | T | T | T |
| 0.9884266054551982 | 0.7812174014252687 | 0.5299037613710020 | T | T | T |
| 0.1820718968134834 | 0.8903912514555549 | 0.4564121852955237 | T | T | T |
| 0.1609306426682699 | 0.4397877011332468 | 0.4662015616312241 | T | T | T |
| 0.5307919656646449 | 0.2259602650358862 | 0.5272692025015268 | T | T | T |
| 0.6713826214734888 | 0.6649519599751145 | 0.4600543062737706 | T | T | T |
| 0.0001570026582950 | 0.4893995573981648 | 0.5272038673729462 | T | T | T |
| 0.6722838896572327 | 0.1623414600887390 | 0.4612829739738444 | T | T | T |
| 0.5078030440376780 | 0.4882232996147231 | 0.5317975311296884 | T | T | T |
| 0.1702784373750343 | 0.1651600079352769 | 0.4614425364361637 | T | T | T |
| 0.5181931818038381 | 0.9948423251430255 | 0.5274833870666679 | T | T | T |
| 0.1701680782655479 | 0.6670671487775646 | 0.4609558812668896 | T | T | T |
| 0.2318915289287986 | 0.7582958518869418 | 0.3212997282865118 | F | F | F |
| 0.5035339362280098 | 0.4978031261506217 | 0.3258474991741451 | F | F | F |
| 0.2649692708826521 | 0.5089321445234489 | 0.3212997314382093 | F | F | F |
| 0.0035676858993980 | 0.9990756731962591 | 0.3258474928707500 | F | F | F |
| 0.7447839408717389 | 0.4870073547503572 | 0.5300749206756837 | T | T | T |
| 0.7774618267972431 | 0.7356088714960372 | 0.5317215067853194 | T | T | T |
| 0.4986365572539143 | 0.7657596857366126 | 0.5316431001932113 | T | T | T |
| 0.0045395799818094 | 0.0001530999562750 | 0.5313454104975368 | T | T | T |
| 0.2312494253227371 | 0.2595683989238466 | 0.3212997314382093 | F | F | F |
| 0.5142673705564675 | 0.2262095135495770 | 0.3212997314382093 | F | F | F |
| 0.8197245306682390 | 0.8569508763088862 | 0.3438201600901110 | F | F | F |
| 0.3987081608861587 | 0.9354815458449366 | 0.3117293471016254 | F | F | F |
| 0.9209922397635992 | 0.1532890848265680 | 0.3018948934479724 | F | F | F |
| 0.1730362783713417 | 0.4314418369345745 | 0.3139001625321427 | F | F | F |
| 0.3283148989230753 | 0.8129202287039874 | 0.3438201600901110 | F | F | F |
| 0.6696296955644030 | 0.3927234531479655 | 0.3117293471016254 | F | F | F |
| 0.9299447303656834 | 0.9155171710171928 | 0.3018948934479724 | F | F | F |
| 0.4004008100581657 | 0.1679411731758620 | 0.3139001625321427 | F | F | F |
| 0.8631193247769602 | 0.3221544605376110 | 0.3438201600901110 | F | F | F |
| 0.9417661356484075 | 0.6640191810841145 | 0.3117293471016254 | F | F | F |
| 0.1588437830399343 | 0.9234787908990896 | 0.3018948934479724 | F | F | F |

|                    |                    |                    |   |   |   |
|--------------------|--------------------|--------------------|---|---|---|
| 0.4368057691204541 | 0.3953728437525825 | 0.3139001625321427 | F | F | F |
| 0.1873433418511681 | 0.1386553765605854 | 0.3078748193479939 | F | F | F |
| 0.6083597115729162 | 0.0601247068673771 | 0.3399656321113582 | F | F | F |
| 0.0860756361414658 | 0.8423171707979833 | 0.3498000846394120 | F | F | F |
| 0.8340315940587928 | 0.5641644156990608 | 0.3377948166808480 | F | F | F |
| 0.6787529268564683 | 0.1826860237720780 | 0.3078748193479939 | F | F | F |
| 0.3374381297247666 | 0.6028827994856698 | 0.3399656321113582 | F | F | F |
| 0.0771230884463421 | 0.0800890850007647 | 0.3498000846394120 | F | F | F |
| 0.6066670156113929 | 0.8276650793790878 | 0.3377948166808480 | F | F | F |
| 0.1439485478357412 | 0.6734517452805591 | 0.3078748193479939 | F | F | F |
| 0.0653017366889372 | 0.3315870247342687 | 0.3399656321113582 | F | F | F |
| 0.8482240925665394 | 0.0721274080750689 | 0.3498000846394120 | F | F | F |
| 0.5702621035290605 | 0.6002333619871152 | 0.3377948166808480 | F | F | F |
| 0.5198187726736379 | 0.4710367487921232 | 0.3758420117279684 | F | F | F |
| 0.9426805682623609 | 0.3924764106726286 | 0.4077528311564294 | F | F | F |
| 0.4180544851025232 | 0.1777170637495047 | 0.4180630728800807 | F | F | F |
| 0.1697176184977991 | 0.8957742608203105 | 0.4059099647347324 | F | F | F |
| 0.0157015007558172 | 0.5134525626218860 | 0.3758420117279684 | F | F | F |
| 0.6712180398470551 | 0.9354949379856805 | 0.4077528311564294 | F | F | F |
| 0.4114658565705795 | 0.4116378360625106 | 0.4180630728800807 | F | F | F |
| 0.9398975868734993 | 0.1628324598200166 | 0.4059099647347324 | F | F | F |
| 0.4767584900125641 | 0.0098831757007858 | 0.3758420117279684 | F | F | F |
| 0.3993614858472370 | 0.6636585286003154 | 0.4077528311564294 | F | F | F |
| 0.1841461447858563 | 0.4047562752544636 | 0.4180630728800807 | F | F | F |
| 0.9035843176360459 | 0.9330345621793654 | 0.4059099647347324 | F | F | F |
| 0.1547644004390776 | 0.1916458452052581 | 0.4119880130487985 | F | F | F |
| 0.7307997352263129 | 0.2707766336215016 | 0.3797524253477320 | F | F | F |
| 0.2566607160774623 | 0.4851340867038942 | 0.3698925933407295 | F | F | F |
| 0.5066993712809946 | 0.7643982900759099 | 0.3817393573504972 | F | F | F |
| 0.6603693326687292 | 0.1487235043712474 | 0.4119880130487985 | F | F | F |
| 0.0053116273190454 | 0.7243880503595861 | 0.3797524253477320 | F | F | F |
| 0.2643070694647278 | 0.2506682497746482 | 0.3698925933407295 | F | F | F |
| 0.7342339744034376 | 0.4998948800842840 | 0.3817393573504972 | F | F | F |
| 0.1983330781461632 | 0.6537794249032487 | 0.4119880130487985 | F | F | F |
| 0.2762959286617175 | 0.9991836010246260 | 0.3797524253477320 | F | F | F |
| 0.4911154325054667 | 0.2586069723533484 | 0.3698925933407295 | F | F | F |
| 0.7714717372890760 | 0.7274977081085865 | 0.3817393573504972 | F | F | F |
| 0.8219563661834945 | 0.8480632605597913 | 0.5417284185958454 | T | T | T |
| 0.8555315859960577 | 0.8019145323640884 | 0.4435005685653010 | T | T | T |
| 0.2749245186249762 | 0.7270524432812711 | 0.4754928274850149 | T | T | T |
| 0.4085363360793666 | 0.9350570139654095 | 0.5172307112040131 | T | T | T |
| 0.7547740949689014 | 0.5130731992281272 | 0.4848728254085018 | T | T | T |
| 0.9289050356955058 | 0.1485640422426356 | 0.5063747878153309 | T | T | T |
| 0.5048150655372761 | 0.2279323543660743 | 0.4749084638705837 | T | T | T |

|                    |                    |                    |   |   |   |
|--------------------|--------------------|--------------------|---|---|---|
| 0.1744583832646317 | 0.4372665892177253 | 0.5196816709893826 | T | T | T |
| 0.3420274062217949 | 0.8120726384387362 | 0.5418424695215582 | T | T | T |
| 0.3494653398106312 | 0.8472060190129012 | 0.4438830733486125 | T | T | T |
| 0.0050624603898827 | 0.2689820069508281 | 0.4756755876711954 | T | T | T |
| 0.6751204855527683 | 0.4001163594280686 | 0.5127797830004012 | T | T | T |
| 0.7468839026344655 | 0.7437427816043550 | 0.4857850472116875 | T | T | T |
| 0.9321955872672594 | 0.9274271043752832 | 0.5040837110099681 | T | T | T |
| 0.2734548837394565 | 0.4976280590156908 | 0.4716354960738334 | T | T | T |
| 0.3991852333273905 | 0.1696501120085933 | 0.5213102158945138 | T | T | T |
| 0.8562260729480031 | 0.3366130402567327 | 0.5432279545187978 | T | T | T |
| 0.8103769883084656 | 0.3414892836745729 | 0.4435752912867814 | T | T | T |
| 0.7353502976821293 | 0.9952924647238038 | 0.4748841984956625 | T | T | T |
| 0.9431115060010862 | 0.6575772497012594 | 0.5171115468384183 | T | T | T |
| 0.5175182384208800 | 0.7389625925727197 | 0.4857316273133675 | T | T | T |
| 0.1511964647999384 | 0.9231110601232722 | 0.5046077963364948 | T | T | T |
| 0.2381024608146200 | 0.2702045464734236 | 0.4732645895098926 | T | T | T |
| 0.4306617783732174 | 0.3920811267637684 | 0.5160388074998842 | T | T | T |
| 0.4875331088048265 | 0.5232347720729400 | 0.4803826821498630 | T | T | T |
| 0.1919797026780704 | 0.1351949984537786 | 0.5105024429327404 | T | T | T |
| 0.6104156288844416 | 0.0611830946878817 | 0.5415000141698741 | T | T | T |
| 0.0657883980155359 | 0.6031392449440941 | 0.4475309607366331 | T | T | T |
| 0.0784382968182485 | 0.8476558638286270 | 0.5507153993636579 | T | T | T |
| 0.5910101208134237 | 0.8193645393611941 | 0.4377320441137430 | T | T | T |
| 0.8265378284903206 | 0.5712363151173722 | 0.5402917900359917 | T | T | T |
| 0.8402712460579320 | 0.0994811703276395 | 0.4487968798684621 | T | T | T |
| 0.9972205562728863 | 0.4785645169070705 | 0.4782235217587888 | T | T | T |
| 0.6914130281908261 | 0.1774648681636440 | 0.5087116477309771 | T | T | T |
| 0.3390970868291725 | 0.5975539746847236 | 0.5409042843373778 | T | T | T |
| 0.3377055022840463 | 0.0620135553877611 | 0.4481813750554164 | T | T | T |
| 0.0869139270281095 | 0.0690172929592923 | 0.5508975330553263 | T | T | T |
| 0.5955003408453050 | 0.5854195307915619 | 0.4376929258722674 | T | T | T |
| 0.6104977208716569 | 0.8171050760993753 | 0.5407136185661179 | T | T | T |
| 0.0667097943153551 | 0.8339598126818282 | 0.4490376621608931 | T | T | T |
| 0.5319907214755031 | 0.9888512615688316 | 0.4784763666865942 | T | T | T |
| 0.1396045593624098 | 0.6764372490216577 | 0.5100766176556590 | T | T | T |
| 0.0745551382025291 | 0.3291808053241202 | 0.5417275165564790 | T | T | T |
| 0.6089484572890481 | 0.3304137602050788 | 0.4472145027310478 | T | T | T |
| 0.8588377307478928 | 0.0709134258878795 | 0.5520507476051968 | T | T | T |
| 0.8259643060053428 | 0.5897806340863779 | 0.4373702316371094 | T | T | T |
| 0.5863760375002799 | 0.5998685016743703 | 0.5406361837806086 | T | T | T |
| 0.1058642231561048 | 0.0609249978507281 | 0.4493602404350250 | T | T | T |
| 0.5956147045512326 | 0.3215509902867872 | 0.5692448831758783 | T | T | T |

Site 6:

In Sn O Pt

1.0000000000000000

14.6581653332033461 0.0000000000000000 0.0000000000000000

7.3189795989957736 12.7095316657975506 0.0000000000000000

-0.1539898045825509 0.0117348602194267 44.4205337057521348

In Sn O Pt

56 8 96 1

Selective dynamics

Direct

|                    |                    |                    |   |   |   |
|--------------------|--------------------|--------------------|---|---|---|
| 0.7601299999999966 | 0.0111199999999982 | 0.3212997282865118 | F | F | F |
| 0.2434165335433676 | 0.9854015590178022 | 0.3303952552037757 | F | F | F |
| 0.7751763166389409 | 0.2373103908289238 | 0.3303952552037757 | F | F | F |
| 0.7758184051208019 | 0.7360378284433793 | 0.3303952583554732 | F | F | F |
| 0.0149432086993002 | 0.2262095211845576 | 0.3212997282865118 | F | F | F |
| 0.9921246538137325 | 0.7693967045361916 | 0.3303952552037757 | F | F | F |
| 0.4928005224042380 | 0.7693966968225325 | 0.3303952583554732 | F | F | F |
| 0.0028580599244989 | 0.4978031261506217 | 0.3258474991741451 | F | F | F |
| 0.5041760321789965 | 0.9965305487398979 | 0.3258474991741451 | F | F | F |
| 0.5754695993874179 | 0.3201690636836290 | 0.3988024242875312 | F | F | F |
| 0.1000335765341589 | 0.3427603350605963 | 0.3893470124551968 | F | F | F |
| 0.5996577811357540 | 0.8418219209004363 | 0.3888098595214231 | F | F | F |
| 0.0767109653050468 | 0.8183100051456691 | 0.3986376552181525 | F | F | F |
| 0.1114318610020959 | 0.5689322078448171 | 0.3988024242875312 | F | F | F |
| 0.5634797054024645 | 0.0941582901478952 | 0.3893470124551968 | F | F | F |
| 0.5641186345741858 | 0.5925506639960076 | 0.3888098595214231 | F | F | F |
| 0.1114494334935046 | 0.0701311676366885 | 0.3986376552181525 | F | F | F |
| 0.3261319662881945 | 0.1051291103740297 | 0.3988024242875312 | F | F | F |
| 0.3492093643680292 | 0.5573702775606932 | 0.3893470124551968 | F | F | F |
| 0.8488610604088223 | 0.5573745329822160 | 0.3888098595214231 | F | F | F |
| 0.8248676130051109 | 0.1057902286404513 | 0.3986376552181525 | F | F | F |
| 0.3383792532104977 | 0.8302004322606820 | 0.3937513645347082 | F | F | F |
| 0.8367796411124147 | 0.3315350310755605 | 0.3937513645347082 | F | F | F |
| 0.7420985760889067 | 0.4866741287148670 | 0.3303952583554732 | F | F | F |
| 0.3376277839809418 | 0.3314195471817456 | 0.3942364325472383 | F | F | F |
| 0.8376409987888778 | 0.8299810709125808 | 0.3937513645347082 | F | F | F |
| 0.7660130543636718 | 0.0148349684040732 | 0.5250641446016304 | T | T | T |
| 0.9095101825357498 | 0.6508065668025541 | 0.4641791837433074 | T | T | T |
| 0.4295729354079665 | 0.6775680108154913 | 0.4564281456559948 | T | T | T |
| 0.2413049273502442 | 0.9805516093618124 | 0.5299229252039345 | T | T | T |
| 0.9356414265692811 | 0.1743606260160191 | 0.4563292385668672 | T | T | T |
| 0.4073094673409229 | 0.1537424408651553 | 0.4664663880203910 | T | T | T |
| 0.2683682659795962 | 0.5145867123844573 | 0.5225582525864290 | T | T | T |
| 0.2282518091761181 | 0.7592477199600963 | 0.5261868391833191 | T | T | T |

|                    |                    |                    |   |   |   |
|--------------------|--------------------|--------------------|---|---|---|
| 0.4455836111671777 | 0.9041975952519944 | 0.4658635549805278 | T | T | T |
| 0.9022215112328815 | 0.4229528339223684 | 0.4568261753087411 | T | T | T |
| 0.7879161931938702 | 0.2333686894345760 | 0.5294944528315032 | T | T | T |
| 0.8976632169814421 | 0.9270357914675528 | 0.4570395276677939 | T | T | T |
| 0.4451759717168151 | 0.4014799647576346 | 0.4664008341174833 | T | T | T |
| 0.2264330780910743 | 0.2637014107913890 | 0.5220919505747610 | T | T | T |
| 0.0210788421801568 | 0.2243351789461566 | 0.5258775889663058 | T | T | T |
| 0.6577487530062474 | 0.4382202567521346 | 0.4648612987626999 | T | T | T |
| 0.6848760849788971 | 0.8911821327451069 | 0.4566322233804971 | T | T | T |
| 0.9880263977388920 | 0.7717755809080936 | 0.5354299275530005 | T | T | T |
| 0.1819284736799232 | 0.8895193637976100 | 0.4563817430766028 | T | T | T |
| 0.1582072721688611 | 0.4404260750874579 | 0.4666616724807174 | T | T | T |
| 0.5172630571191181 | 0.2213344884172148 | 0.5223286287554073 | T | T | T |
| 0.6708825231045262 | 0.6656313928954730 | 0.4610052262327581 | T | T | T |
| 0.0038244811409910 | 0.5025509649546295 | 0.5317003882701713 | T | T | T |
| 0.6724699429334795 | 0.1632414270334588 | 0.4610941427402843 | T | T | T |
| 0.4973731134699825 | 0.5116223349927083 | 0.5278433672961879 | T | T | T |
| 0.1703919946740766 | 0.1644838870256417 | 0.4612669708536279 | T | T | T |
| 0.5241439955477611 | 0.9893735967452275 | 0.5276846810037221 | T | T | T |
| 0.1691553194245237 | 0.6665374736984507 | 0.4617100884330299 | T | T | T |
| 0.2318915289287986 | 0.7582958518869418 | 0.3212997282865118 | F | F | F |
| 0.5035339362280098 | 0.4978031261506217 | 0.3258474991741451 | F | F | F |
| 0.2649692708826521 | 0.5089321445234489 | 0.3212997314382093 | F | F | F |
| 0.0035676858993980 | 0.9990756731962591 | 0.3258474928707500 | F | F | F |
| 0.7431052629868904 | 0.4872954773383611 | 0.5304235390747014 | T | T | T |
| 0.7862548168435342 | 0.7320927417626242 | 0.5330533330406269 | T | T | T |
| 0.4986578915775278 | 0.7692451167731645 | 0.5322145942069842 | T | T | T |
| 0.0052430885061026 | 0.9966438785484352 | 0.5311028262035183 | T | T | T |
| 0.2312494253227371 | 0.2595683989238466 | 0.3212997314382093 | F | F | F |
| 0.5142673705564675 | 0.2262095135495770 | 0.3212997314382093 | F | F | F |
| 0.8197245306682390 | 0.8569508763088862 | 0.3438201600901110 | F | F | F |
| 0.3987081608861587 | 0.9354815458449366 | 0.3117293471016254 | F | F | F |
| 0.9209922397635992 | 0.1532890848265680 | 0.3018948934479724 | F | F | F |
| 0.1730362783713417 | 0.4314418369345745 | 0.3139001625321427 | F | F | F |
| 0.3283148989230753 | 0.8129202287039874 | 0.3438201600901110 | F | F | F |
| 0.6696296955644030 | 0.3927234531479655 | 0.3117293471016254 | F | F | F |
| 0.9299447303656834 | 0.9155171710171928 | 0.3018948934479724 | F | F | F |
| 0.4004008100581657 | 0.1679411731758620 | 0.3139001625321427 | F | F | F |
| 0.8631193247769602 | 0.3221544605376110 | 0.3438201600901110 | F | F | F |
| 0.9417661356484075 | 0.6640191810841145 | 0.3117293471016254 | F | F | F |
| 0.1588437830399343 | 0.9234787908990896 | 0.3018948934479724 | F | F | F |
| 0.4368057691204541 | 0.3953728437525825 | 0.3139001625321427 | F | F | F |
| 0.1873433418511681 | 0.1386553765605854 | 0.3078748193479939 | F | F | F |
| 0.6083597115729162 | 0.0601247068673771 | 0.3399656321113582 | F | F | F |



|                    |                    |                    |   |   |   |
|--------------------|--------------------|--------------------|---|---|---|
| 0.0860756361414658 | 0.8423171707979833 | 0.3498000846394120 | F | F | F |
| 0.8340315940587928 | 0.5641644156990608 | 0.3377948166808480 | F | F | F |
| 0.6787529268564683 | 0.1826860237720780 | 0.3078748193479939 | F | F | F |
| 0.3374381297247666 | 0.6028827994856698 | 0.3399656321113582 | F | F | F |
| 0.0771230884463421 | 0.0800890850007647 | 0.3498000846394120 | F | F | F |
| 0.6066670156113929 | 0.8276650793790878 | 0.3377948166808480 | F | F | F |
| 0.1439485478357412 | 0.6734517452805591 | 0.3078748193479939 | F | F | F |
| 0.0653017366889372 | 0.3315870247342687 | 0.3399656321113582 | F | F | F |
| 0.8482240925665394 | 0.0721274080750689 | 0.3498000846394120 | F | F | F |
| 0.5702621035290605 | 0.6002333619871152 | 0.3377948166808480 | F | F | F |
| 0.5198187726736379 | 0.4710367487921232 | 0.3758420117279684 | F | F | F |
| 0.9426805682623609 | 0.3924764106726286 | 0.4077528311564294 | F | F | F |
| 0.4180544851025232 | 0.1777170637495047 | 0.4180630728800807 | F | F | F |
| 0.1697176184977991 | 0.8957742608203105 | 0.4059099647347324 | F | F | F |
| 0.0157015007558172 | 0.5134525626218860 | 0.3758420117279684 | F | F | F |
| 0.6712180398470551 | 0.9354949379856805 | 0.4077528311564294 | F | F | F |
| 0.4114658565705795 | 0.4116378360625106 | 0.4180630728800807 | F | F | F |
| 0.9398975868734993 | 0.1628324598200166 | 0.4059099647347324 | F | F | F |
| 0.4767584900125641 | 0.0098831757007858 | 0.3758420117279684 | F | F | F |
| 0.3993614858472370 | 0.6636585286003154 | 0.4077528311564294 | F | F | F |
| 0.1841461447858563 | 0.4047562752544636 | 0.4180630728800807 | F | F | F |
| 0.9035843176360459 | 0.9330345621793654 | 0.4059099647347324 | F | F | F |
| 0.1547644004390776 | 0.1916458452052581 | 0.4119880130487985 | F | F | F |
| 0.7307997352263129 | 0.2707766336215016 | 0.3797524253477320 | F | F | F |
| 0.2566607160774623 | 0.4851340867038942 | 0.3698925933407295 | F | F | F |
| 0.5066993712809946 | 0.7643982900759099 | 0.3817393573504972 | F | F | F |
| 0.6603693326687292 | 0.1487235043712474 | 0.4119880130487985 | F | F | F |
| 0.0053116273190454 | 0.7243880503595861 | 0.3797524253477320 | F | F | F |
| 0.2643070694647278 | 0.2506682497746482 | 0.3698925933407295 | F | F | F |
| 0.7342339744034376 | 0.4998948800842840 | 0.3817393573504972 | F | F | F |
| 0.1983330781461632 | 0.6537794249032487 | 0.4119880130487985 | F | F | F |
| 0.2762959286617175 | 0.9991836010246260 | 0.3797524253477320 | F | F | F |
| 0.4911154325054667 | 0.2586069723533484 | 0.3698925933407295 | F | F | F |
| 0.7714717372890760 | 0.7274977081085865 | 0.3817393573504972 | F | F | F |
| 0.8093954845777608 | 0.8591518735701105 | 0.5395876269621671 | T | T | T |
| 0.8536733201392018 | 0.8037926248804794 | 0.4432260815128071 | T | T | T |
| 0.2755252373712036 | 0.7260566828723101 | 0.4755693390061538 | T | T | T |
| 0.4102299258137305 | 0.9352399619599367 | 0.5177192891139700 | T | T | T |
| 0.7500122610319706 | 0.5085598714201479 | 0.4847688872620474 | T | T | T |
| 0.9356176493855856 | 0.1435617421956073 | 0.5045329050659222 | T | T | T |
| 0.5000811337205979 | 0.2308500115424142 | 0.4731695111560690 | T | T | T |
| 0.1794584295925878 | 0.4350259164537129 | 0.5197882508127710 | T | T | T |
| 0.3410444059571098 | 0.8122634913678736 | 0.5414965716509100 | T | T | T |
| 0.3489010183777428 | 0.8481767137430100 | 0.4438636862160862 | T | T | T |

|                    |                    |                    |   |   |   |
|--------------------|--------------------|--------------------|---|---|---|
| 0.0060027047285819 | 0.2675463624927289 | 0.4755114922725736 | T | T | T |
| 0.6651679696708986 | 0.3993466103604346 | 0.5166904009666448 | T | T | T |
| 0.7398567615126104 | 0.7467378077975099 | 0.4865631207810162 | T | T | T |
| 0.9317811917723891 | 0.9246322375093987 | 0.5056189653378931 | T | T | T |
| 0.2759274815604861 | 0.4950028680403979 | 0.4732554256337486 | T | T | T |
| 0.3966254464943134 | 0.1677566764894620 | 0.5200551994835712 | T | T | T |
| 0.8555175975396605 | 0.3333400213788882 | 0.5417215321289356 | T | T | T |
| 0.8112661083571809 | 0.3410004034017498 | 0.4438234431744612 | T | T | T |
| 0.7329307097597749 | 0.9992617259533441 | 0.4750354837632775 | T | T | T |
| 0.9375641406058107 | 0.6683735855762551 | 0.5099956596656113 | T | T | T |
| 0.5166344834805299 | 0.7389058080102855 | 0.4862604397328619 | T | T | T |
| 0.1507348070571942 | 0.9230990674417398 | 0.5044732725188364 | T | T | T |
| 0.2371225384855380 | 0.2699786946022942 | 0.4729210560171287 | T | T | T |
| 0.4426996302144093 | 0.3903992797104940 | 0.5203316288733559 | T | T | T |
| 0.4863902115342732 | 0.5247580065578734 | 0.4788233909202702 | T | T | T |
| 0.1935876320010023 | 0.1336571159883020 | 0.5103622918920123 | T | T | T |
| 0.6053139113791756 | 0.0687196285796891 | 0.5421014701523440 | T | T | T |
| 0.0672843725021968 | 0.6016897377080432 | 0.4470622603191873 | T | T | T |
| 0.0778487082636014 | 0.8493435310534719 | 0.5517673352495127 | T | T | T |
| 0.5902483183788401 | 0.8194308271054555 | 0.4376842534719711 | T | T | T |
| 0.8195815907025672 | 0.5699892591197131 | 0.5381811994139952 | T | T | T |
| 0.8401640749468228 | 0.0996197165523925 | 0.4491565767342305 | T | T | T |
| 0.9976807582449080 | 0.4782064106151526 | 0.4802384583660248 | T | T | T |
| 0.6805421568507453 | 0.1872377585066894 | 0.5101629026071627 | T | T | T |
| 0.3378219175196576 | 0.5995098267460239 | 0.5426689955164850 | T | T | T |
| 0.3376221271309985 | 0.0602470924805370 | 0.4479000427396540 | T | T | T |
| 0.0847473586234861 | 0.0699976611717234 | 0.5505111505707745 | T | T | T |
| 0.5951708042968304 | 0.5865131262536371 | 0.4377998147251850 | T | T | T |
| 0.6143575198934723 | 0.8167037482949772 | 0.5413772995379839 | T | T | T |
| 0.0667670968280764 | 0.8334145511155213 | 0.4491690311492775 | T | T | T |
| 0.5321533245007725 | 0.9902467689633963 | 0.4785717001962012 | T | T | T |
| 0.1408093583620313 | 0.6759441712951031 | 0.5110895507022037 | T | T | T |
| 0.0726701952187495 | 0.3326981232503801 | 0.5411210555404293 | T | T | T |
| 0.6089116027222152 | 0.3305854152426987 | 0.4477832316642054 | T | T | T |
| 0.8544239151880924 | 0.0792328753547680 | 0.5508953719688698 | T | T | T |
| 0.8246902956125917 | 0.5888401377302253 | 0.4375751304163847 | T | T | T |
| 0.5823469692182434 | 0.5999830751881973 | 0.5410716703984205 | T | T | T |
| 0.1072192463787172 | 0.0597348763793479 | 0.4490219044464074 | T | T | T |
| 0.9469575155540728 | 0.6508225730279275 | 0.5740387802266246 | T | T | T |

---

**Pt- dimer on Indium Oxide ( In order of increasing energy as shown in the SI)**

Best:

1.0000000000000000  
14.6383517878741038 0.0000000000000000 0.0000000000000000  
7.3191758939370519 12.6771845178323304 0.0000000000000000  
0.0000000000000000 0.0000000000000000 51.0694492725965290

In O Pt  
64 96 2

Selective dynamics

Direct

|                    |                    |                    |   |   |   |
|--------------------|--------------------|--------------------|---|---|---|
| 0.7611480013333320 | 0.0111480013333320 | 0.4668317439885570 | F | F | F |
| 0.2388520043333315 | 0.9888520043333315 | 0.4746588917436156 | F | F | F |
| 0.7388519966666678 | 0.4888520196666661 | 0.4746588944350378 | F | F | F |
| 0.2611479936666683 | 0.5111480166666666 | 0.4668317466799934 | F | F | F |
| 0.2277039973333359 | 0.7611480013333320 | 0.4668317439885570 | F | F | F |
| 0.7722959913333298 | 0.2388520043333315 | 0.4746588917436156 | F | F | F |
| 0.7722959836666661 | 0.7388519966666678 | 0.4746588944350378 | F | F | F |
| 0.2277039896666651 | 0.2611479936666683 | 0.4668317466799934 | F | F | F |
| 0.0111480013333320 | 0.2277039973333359 | 0.4668317439885570 | F | F | F |
| 0.9888520043333315 | 0.7722959913333369 | 0.4746588917436156 | F | F | F |
| 0.4888520196666661 | 0.7722959836666661 | 0.4746588944350378 | F | F | F |
| 0.5111480166666666 | 0.2277039896666651 | 0.4668317466799934 | F | F | F |
| 0.0000000000000000 | 0.0000000000000000 | 0.4707453188607431 | F | F | F |
| 0.9999999846666654 | 0.5000000076666637 | 0.4707453242436088 | F | F | F |
| 0.5000000076666637 | 0.5000000076666637 | 0.4707453242436088 | F | F | F |
| 0.5000000076666637 | 0.9999999846666654 | 0.4707453242436088 | F | F | F |
| 0.5714614760499686 | 0.3220635869978707 | 0.5335266216303154 | F | F | F |
| 0.0954565668243177 | 0.3446929456050469 | 0.5253897752549719 | F | F | F |
| 0.5951195294231795 | 0.8450268277640021 | 0.5249275287208306 | F | F | F |
| 0.0713873525637467 | 0.8214752461005688 | 0.5333848297685080 | F | F | F |
| 0.1064749369521607 | 0.5714614760499686 | 0.5335266216303154 | F | F | F |
| 0.5598504875706354 | 0.0954565668243177 | 0.5253897752549719 | F | F | F |
| 0.5598536428128256 | 0.5951195294231795 | 0.5249275287208306 | F | F | F |
| 0.1071374013356774 | 0.0713873525637467 | 0.5333848297685080 | F | F | F |
| 0.3220635869978707 | 0.1064749369521607 | 0.5335266216303154 | F | F | F |
| 0.3446929456050469 | 0.5598504875706354 | 0.5253897752549719 | F | F | F |
| 0.8450268277640021 | 0.5598536428128256 | 0.5249275287208306 | F | F | F |
| 0.8214752461005688 | 0.1071374013356774 | 0.5333848297685080 | F | F | F |
| 0.3333333333333357 | 0.3333333333333357 | 0.5295973615149521 | F | F | F |
| 0.3334481086611234 | 0.8333859062698394 | 0.5291799365853791 | F | F | F |
| 0.8333859062698394 | 0.8331659850690301 | 0.5291799365853791 | F | F | F |
| 0.8331659850690301 | 0.3334481086611234 | 0.5291799365853791 | F | F | F |
| 0.7544707196023146 | 0.0070445605655319 | 0.6435644374896271 | T | T | T |

|                    |                     |                    |   |   |   |
|--------------------|---------------------|--------------------|---|---|---|
| 0.9047972643992253 | 0.6551723910194682  | 0.5921543540923735 | T | T | T |
| 0.4288150753530098 | 0.6779294513329911  | 0.5831198321638612 | T | T | T |
| 0.2485423024657048 | 0.9758382135542935  | 0.6505080772091295 | T | T | T |
| 0.7394195625487845 | 0.4948002737742043  | 0.6503356292684179 | T | T | T |
| 0.9279034804990043 | 0.1799999292014966  | 0.5831673275412561 | T | T | T |
| 0.4022662556098639 | 0.1558317237547032  | 0.5920594359739606 | T | T | T |
| 0.2649869569814303 | 0.5146905699679897  | 0.6417260659382379 | T | T | T |
| 0.2422130049818928 | 0.7542923916722531  | 0.6428184000146432 | T | T | T |
| 0.4406674774626169 | 0.9048965103991885  | 0.5920364598177502 | T | T | T |
| 0.8919930554972211 | 0.4302970421541339  | 0.5829116235749062 | T | T | T |
| 0.7710270596906994 | 0.2466439361396857  | 0.6508640760455761 | T | T | T |
| 0.7653225644063583 | 0.7383986142744901  | 0.6499250218745186 | T | T | T |
| 0.8909798588039406 | 0.9281428878516415  | 0.5828653750260745 | T | T | T |
| 0.4411903661822714 | 0.4037758199367151  | 0.5920627740702827 | T | T | T |
| 0.2204590945301001 | 0.2645925641390067  | 0.6418134451050715 | T | T | T |
| 0.9999139428287869 | 0.2513579854791510  | 0.6415971983511867 | T | T | T |
| 0.6546275923806801 | 0.4402790591641583  | 0.5921073110551456 | T | T | T |
| 0.6782173922875161 | 0.8935956113512298  | 0.5831716466297699 | T | T | T |
| 0.9752523113485811 | 0.7804106914216937  | 0.6504377586388171 | T | T | T |
| 0.4992383147800403 | 0.7634807430532422  | 0.6497959955639507 | T | T | T |
| 0.1806036303895459 | 0.8911404100342929  | 0.5829321711160088 | T | T | T |
| 0.1550541883558005 | 0.4415480839318874  | 0.5921229970676046 | T | T | T |
| 0.5147039077984723 | 0.2209655895888629  | 0.6411540562878522 | T | T | T |
| 0.9995425711507443 | -0.0001133342475685 | 0.6397923438085853 | T | T | T |
| 0.6667348005779946 | 0.6666794813149136  | 0.5867282576226144 | T | T | T |
| 0.9928617052707815 | 0.4997471975533070  | 0.6459892565848986 | T | T | T |
| 0.6685864674468667 | 0.1646988434831150  | 0.5879239468501272 | T | T | T |
| 0.4975499427260917 | 0.5108513785134703  | 0.6459434814682493 | T | T | T |
| 0.1649490113462806 | 0.1650251581995279  | 0.5881215938068730 | T | T | T |
| 0.5107619111845101 | 0.9928083077360802  | 0.6455983250310792 | T | T | T |
| 0.1652922069541375 | 0.6698319868234629  | 0.5881351384462441 | T | T | T |
| 0.8159583373333348 | 0.8601013333333327  | 0.4862116819395084 | F | F | F |
| 0.3946230123333336 | 0.9387660083333316  | 0.4585959608606061 | F | F | F |
| 0.9187303516666674 | 0.1545573616666687  | 0.4501329301675625 | F | F | F |
| 0.1692716669999967 | 0.4334446800000009  | 0.4604640541843779 | F | F | F |
| 0.3239403293333325 | 0.8159583373333348  | 0.4862116819395084 | F | F | F |
| 0.6666109793333348 | 0.3946230123333336  | 0.4585959608606061 | F | F | F |
| 0.9267122866666639 | 0.9187303516666674  | 0.4501329301675625 | F | F | F |
| 0.3972836530000023 | 0.1692716669999967  | 0.4604640541843779 | F | F | F |
| 0.8601013333333327 | 0.3239403293333325  | 0.4862116819395084 | F | F | F |
| 0.9387660083333316 | 0.6666109793333348  | 0.4585959608606061 | F | F | F |
| 0.1545573616666687 | 0.9267122866666639  | 0.4501329301675625 | F | F | F |
| 0.4334446800000009 | 0.3972836530000023  | 0.4604640541843779 | F | F | F |
| 0.1840416783333296 | 0.1398986823333317  | 0.4552789502821071 | F | F | F |

|                    |                    |                    |   |   |   |
|--------------------|--------------------|--------------------|---|---|---|
| 0.6053770033333308 | 0.0612340073333328 | 0.4828946713610023 | F | F | F |
| 0.0812696673333306 | 0.8454426573333365 | 0.4913577008838672 | F | F | F |
| 0.8307283486666677 | 0.5665553356666635 | 0.4810265780372305 | F | F | F |
| 0.6760596393333316 | 0.1840416783333367 | 0.4552789502821071 | F | F | F |
| 0.3333889893333364 | 0.6053770033333308 | 0.4828946713610023 | F | F | F |
| 0.0732876753333329 | 0.0812696673333306 | 0.4913577008838672 | F | F | F |
| 0.6027163156666688 | 0.8307283486666677 | 0.4810265780372305 | F | F | F |
| 0.1398986823333317 | 0.6760596393333316 | 0.4552789502821071 | F | F | F |
| 0.0612340073333328 | 0.3333889893333364 | 0.4828946713610023 | F | F | F |
| 0.8454426573333365 | 0.0732876753333329 | 0.4913577008838672 | F | F | F |
| 0.5665553356666635 | 0.6027163156666688 | 0.4810265780372305 | F | F | F |
| 0.5157927795144346 | 0.4732687373369373 | 0.5137680585633078 | F | F | F |
| 0.9389780411721915 | 0.3945739458359014 | 0.5412288865474011 | F | F | F |
| 0.4138055884135099 | 0.1792879430058036 | 0.5501013560831254 | F | F | F |
| 0.1643402231079705 | 0.8991522013241848 | 0.5396430093322451 | F | F | F |
| 0.0109384831486281 | 0.5157927795144346 | 0.5137680585633078 | F | F | F |
| 0.6664480129919070 | 0.9389780411721915 | 0.5412288865474011 | F | F | F |
| 0.4069064685806794 | 0.4138055884135099 | 0.5501013560831254 | F | F | F |
| 0.9365075755678447 | 0.1643402231079705 | 0.5396430093322451 | F | F | F |
| 0.4732687373369373 | 0.0109384831486281 | 0.5137680585633078 | F | F | F |
| 0.3945739458359014 | 0.6664480129919070 | 0.5412288865474011 | F | F | F |
| 0.1792879430058036 | 0.4069064685806794 | 0.5501013560831254 | F | F | F |
| 0.8991522013241848 | 0.9365075755678447 | 0.5396430093322451 | F | F | F |
| 0.1502078384511734 | 0.1932397001298156 | 0.5448734685138632 | F | F | F |
| 0.7272745789267816 | 0.2725057257219632 | 0.5171331615441943 | F | F | F |
| 0.2523256400471894 | 0.4873897408432910 | 0.5086482917388153 | F | F | F |
| 0.5022127006463535 | 0.7673910184547594 | 0.5188430143373637 | F | F | F |
| 0.6565524614190181 | 0.1502078384511734 | 0.5448734685138632 | F | F | F |
| 0.0002196953512481 | 0.7272745789267816 | 0.5171331615441943 | F | F | F |
| 0.2602846191095196 | 0.2523256400471894 | 0.5086482917388153 | F | F | F |
| 0.7303962808988871 | 0.5022127006463535 | 0.5188430143373637 | F | F | F |
| 0.1932397001298156 | 0.6565524614190181 | 0.5448734685138632 | F | F | F |
| 0.2725057257219632 | 0.0002196953512481 | 0.5171331615441943 | F | F | F |
| 0.4873897408432910 | 0.2602846191095196 | 0.5086482917388153 | F | F | F |
| 0.7673910184547594 | 0.7303962808988871 | 0.5188430143373637 | F | F | F |
| 0.8087166971872787 | 0.8523618337761740 | 0.6597278247640779 | T | T | T |
| 0.8504764462317650 | 0.8050827745213547 | 0.5723758973241275 | T | T | T |
| 0.2737406965987353 | 0.7257371483947154 | 0.5998727364019398 | T | T | T |
| 0.3989267429087753 | 0.9425770080530170 | 0.6350147252293488 | T | T | T |
| 0.7476063393398525 | 0.5133633638797389 | 0.6082461617345413 | T | T | T |
| 0.9223250948073355 | 0.1596644315231761 | 0.6274075280472098 | T | T | T |
| 0.4960339992420039 | 0.2320820133061662 | 0.5985314210872927 | T | T | T |
| 0.1716150889698181 | 0.4392700377575871 | 0.6396000055586629 | T | T | T |
| 0.3422400082502028 | 0.8063217767452108 | 0.6585524898365653 | T | T | T |

|                    |                    |                    |   |   |   |
|--------------------|--------------------|--------------------|---|---|---|
| 0.3445438881536242 | 0.8500825128297559 | 0.5724905265316921 | T | T | T |
| 0.9991190860082180 | 0.2748657567488445 | 0.5992946173600814 | T | T | T |
| 0.6602345774713517 | 0.3993852026895159 | 0.6352625063580322 | T | T | T |
| 0.7390944935830348 | 0.7474720690748495 | 0.6079479022356182 | T | T | T |
| 0.9225767104673520 | 0.9198195344930594 | 0.6249919053871875 | T | T | T |
| 0.2703758367720577 | 0.4992534646886700 | 0.5990525513634601 | T | T | T |
| 0.3890346561359831 | 0.1715179005373556 | 0.6393320761492423 | T | T | T |
| 0.8512938072092254 | 0.3350372010305047 | 0.6611186498125762 | T | T | T |
| 0.8056250381605708 | 0.3440282847717861 | 0.5725910252387958 | T | T | T |
| 0.7266524182573135 | 0.9995258878506914 | 0.6000636533116339 | T | T | T |
| 0.9418063233046163 | 0.6613751325623398 | 0.6353664283349927 | T | T | T |
| 0.5140553857346865 | 0.7387123318565849 | 0.6078260148311621 | T | T | T |
| 0.1585313865061724 | 0.9229196480081545 | 0.6253737434170829 | T | T | T |
| 0.2292608454312995 | 0.2709353918084056 | 0.5991093923244221 | T | T | T |
| 0.4394462275877991 | 0.3898111282601135 | 0.6394344127613339 | T | T | T |
| 0.4815531824826030 | 0.5270594769022361 | 0.6032911672158018 | T | T | T |
| 0.1710013192759459 | 0.1384984059862273 | 0.6342386714361544 | T | T | T |
| 0.5952825699776074 | 0.0676712159712159 | 0.6584581631399755 | T | T | T |
| 0.0624634380610444 | 0.6060280529389920 | 0.5768820881661564 | T | T | T |
| 0.9925041284723501 | 0.8618392667521526 | 0.6848886410946192 | T | T | T |
| 0.5848197201463650 | 0.8224252180203347 | 0.5669021425949297 | T | T | T |
| 0.8277941527410109 | 0.5736021288225703 | 0.6595662815427790 | T | T | T |
| 0.8375903959697278 | 0.1001151745851416 | 0.5783310989735408 | T | T | T |
| 0.9909844371290516 | 0.4821139239446675 | 0.6033532574850317 | T | T | T |
| 0.6849532227060521 | 0.1771166330656559 | 0.6314612077091383 | T | T | T |
| 0.3375011894183465 | 0.5959336981427583 | 0.6586696483237939 | T | T | T |
| 0.3311783046026122 | 0.0624926143537178 | 0.5768273703657879 | T | T | T |
| 0.1779108039942504 | 0.9846555283371871 | 0.6880616731246528 | T | T | T |
| 0.5932250319718338 | 0.5842873098291733 | 0.5669240237931817 | T | T | T |
| 0.5987845787310269 | 0.8279994225555186 | 0.6594742489466642 | T | T | T |
| 0.0628847090810510 | 0.8371570995329266 | 0.5781433455390707 | T | T | T |
| 0.5264425363740575 | 0.9924605471864708 | 0.6029436370176966 | T | T | T |
| 0.1359843773766330 | 0.6900293878194387 | 0.6343434618850126 | T | T | T |
| 0.0657028418246756 | 0.3398835688474736 | 0.6589448452501560 | T | T | T |
| 0.6055611787441713 | 0.3319648694389414 | 0.5767177940772649 | T | T | T |
| 0.7743933283845157 | 0.1647566868341668 | 0.6859726782002588 | T | T | T |
| 0.8222254736404389 | 0.5935012492877035 | 0.5668919602985937 | T | T | T |
| 0.5753718840263634 | 0.5975317437477088 | 0.6599613132159325 | T | T | T |
| 0.0994428933173121 | 0.0630526176691596 | 0.5783018992443827 | T | T | T |
| 0.0858673261806969 | 0.9291080701676455 | 0.6854453008289575 | T | T | T |

Best+1

In O Pt

1.0000000000000000

14.6383517878741038 0.0000000000000000 0.0000000000000000  
7.3191758939370519 12.6771845178323304 0.0000000000000000  
0.0000000000000000 0.0000000000000000 51.0694492725965290

In O Pt

64 96 2

Selective dynamics

Direct

|                    |                    |                    |   |   |   |
|--------------------|--------------------|--------------------|---|---|---|
| 0.7611480013333320 | 0.0111480013333320 | 0.4668317439885570 | F | F | F |
| 0.2388520043333315 | 0.9888520043333315 | 0.4746588917436156 | F | F | F |
| 0.7388519966666678 | 0.4888520196666661 | 0.4746588944350378 | F | F | F |
| 0.2611479936666683 | 0.5111480166666666 | 0.4668317466799934 | F | F | F |
| 0.2277039973333359 | 0.7611480013333320 | 0.4668317439885570 | F | F | F |
| 0.7722959913333298 | 0.2388520043333315 | 0.4746588917436156 | F | F | F |
| 0.7722959836666661 | 0.7388519966666678 | 0.4746588944350378 | F | F | F |
| 0.2277039896666651 | 0.2611479936666683 | 0.4668317466799934 | F | F | F |
| 0.0111480013333320 | 0.2277039973333359 | 0.4668317439885570 | F | F | F |
| 0.9888520043333315 | 0.7722959913333369 | 0.4746588917436156 | F | F | F |
| 0.4888520196666661 | 0.7722959836666661 | 0.4746588944350378 | F | F | F |
| 0.5111480166666666 | 0.2277039896666651 | 0.4668317466799934 | F | F | F |
| 0.0000000000000000 | 0.0000000000000000 | 0.4707453188607431 | F | F | F |
| 0.9999999846666654 | 0.5000000076666637 | 0.4707453242436088 | F | F | F |
| 0.5000000076666637 | 0.5000000076666637 | 0.4707453242436088 | F | F | F |
| 0.5000000076666637 | 0.9999999846666654 | 0.4707453242436088 | F | F | F |
| 0.5714614760499686 | 0.3220635869978707 | 0.5335266216303154 | F | F | F |
| 0.0954565668243177 | 0.3446929456050469 | 0.5253897752549719 | F | F | F |
| 0.5951195294231795 | 0.8450268277640021 | 0.5249275287208306 | F | F | F |
| 0.0713873525637467 | 0.8214752461005688 | 0.5333848297685080 | F | F | F |
| 0.1064749369521607 | 0.5714614760499686 | 0.5335266216303154 | F | F | F |
| 0.5598504875706354 | 0.0954565668243177 | 0.5253897752549719 | F | F | F |
| 0.5598536428128256 | 0.5951195294231795 | 0.5249275287208306 | F | F | F |
| 0.1071374013356774 | 0.0713873525637467 | 0.5333848297685080 | F | F | F |
| 0.3220635869978707 | 0.1064749369521607 | 0.5335266216303154 | F | F | F |
| 0.3446929456050469 | 0.5598504875706354 | 0.5253897752549719 | F | F | F |
| 0.8450268277640021 | 0.5598536428128256 | 0.5249275287208306 | F | F | F |
| 0.8214752461005688 | 0.1071374013356774 | 0.5333848297685080 | F | F | F |
| 0.3333333333333357 | 0.3333333333333357 | 0.5295973615149521 | F | F | F |
| 0.3334481086611234 | 0.8333859062698394 | 0.5291799365853791 | F | F | F |
| 0.8333859062698394 | 0.8331659850690301 | 0.5291799365853791 | F | F | F |
| 0.8331659850690301 | 0.3334481086611234 | 0.5291799365853791 | F | F | F |
| 0.7504083136881776 | 0.0012516167830593 | 0.6415065070808945 | T | T | T |
| 0.9055461574748962 | 0.6542317399339563 | 0.5928455114346066 | T | T | T |
| 0.4255001696020568 | 0.6794815785021339 | 0.5836122591016910 | T | T | T |
| 0.2431380474370373 | 0.9862769672655349 | 0.6511340164370564 | T | T | T |

|                    |                    |                    |   |   |   |
|--------------------|--------------------|--------------------|---|---|---|
| 0.7352039400986511 | 0.4997620665927255 | 0.6497981618466225 | T | T | T |
| 0.9290566420964451 | 0.1785136399362761 | 0.5824725013795031 | T | T | T |
| 0.4061395303932765 | 0.1531147614119628 | 0.5920145371639967 | T | T | T |
| 0.2647313492080443 | 0.5118658014902773 | 0.6409313313453743 | T | T | T |
| 0.2280664750602919 | 0.7613859295094398 | 0.6450873790380114 | T | T | T |
| 0.4399547813912904 | 0.9039154849838336 | 0.5921646102593433 | T | T | T |
| 0.8917951344528483 | 0.4303113238594622 | 0.5833853878022693 | T | T | T |
| 0.7860051374177012 | 0.2408690888146321 | 0.6491241102463186 | T | T | T |
| 0.7660396853911053 | 0.7420623557834951 | 0.6506493762386971 | T | T | T |
| 0.8918250452571719 | 0.9299172683693543 | 0.5832779667911386 | T | T | T |
| 0.4417752326099227 | 0.4018139962842822 | 0.5919821377942535 | T | T | T |
| 0.2289797595446530 | 0.2557393293877186 | 0.6422798538129172 | T | T | T |
| 0.0054772989494223 | 0.2319983916162829 | 0.6391525697692158 | T | T | T |
| 0.6537549974430582 | 0.4407016392086970 | 0.5923061888148383 | T | T | T |
| 0.6787418378673611 | 0.8911611479440186 | 0.5828744564502738 | T | T | T |
| 0.9841706677221130 | 0.7806891029166220 | 0.6483833764526891 | T | T | T |
| 0.4892463196887932 | 0.7690743849771139 | 0.6505797451014875 | T | T | T |
| 0.1778046084644154 | 0.8937163278653750 | 0.5841696719925324 | T | T | T |
| 0.1544787366627087 | 0.4394005108720128 | 0.5925466515999376 | T | T | T |
| 0.5174523761004018 | 0.2188696904717522 | 0.6417201456975126 | T | T | T |
| 0.0019425501666192 | 0.9958883457809121 | 0.6466017227088314 | T | T | T |
| 0.6654742306031585 | 0.6670241416172346 | 0.5872181226906503 | T | T | T |
| 0.9921575348660071 | 0.5039617475220713 | 0.6484386756048267 | T | T | T |
| 0.6698966502075249 | 0.1650855858108352 | 0.5879516746002751 | T | T | T |
| 0.4946597346071125 | 0.5111141514019589 | 0.6457366942577381 | T | T | T |
| 0.1683410299217129 | 0.1644710299940937 | 0.5870029621802231 | T | T | T |
| 0.5109350312380242 | 0.9904633688830854 | 0.6457851356988619 | T | T | T |
| 0.1675949106208397 | 0.6671825633962197 | 0.5879995869877854 | T | T | T |
| 0.8159583373333348 | 0.8601013333333327 | 0.4862116819395084 | F | F | F |
| 0.3946230123333336 | 0.9387660083333316 | 0.4585959608606061 | F | F | F |
| 0.9187303516666674 | 0.1545573616666687 | 0.4501329301675625 | F | F | F |
| 0.1692716669999967 | 0.4334446800000009 | 0.4604640541843779 | F | F | F |
| 0.3239403293333325 | 0.8159583373333348 | 0.4862116819395084 | F | F | F |
| 0.6666109793333348 | 0.3946230123333336 | 0.4585959608606061 | F | F | F |
| 0.9267122866666639 | 0.9187303516666674 | 0.4501329301675625 | F | F | F |
| 0.3972836530000023 | 0.1692716669999967 | 0.4604640541843779 | F | F | F |
| 0.8601013333333327 | 0.3239403293333325 | 0.4862116819395084 | F | F | F |
| 0.9387660083333316 | 0.6666109793333348 | 0.4585959608606061 | F | F | F |
| 0.1545573616666687 | 0.9267122866666639 | 0.4501329301675625 | F | F | F |
| 0.4334446800000009 | 0.3972836530000023 | 0.4604640541843779 | F | F | F |
| 0.1840416783333296 | 0.1398986823333317 | 0.4552789502821071 | F | F | F |
| 0.6053770033333308 | 0.0612340073333328 | 0.4828946713610023 | F | F | F |
| 0.0812696673333306 | 0.8454426573333365 | 0.4913577008838672 | F | F | F |
| 0.8307283486666677 | 0.5665553356666635 | 0.4810265780372305 | F | F | F |



|                    |                    |                    |   |   |   |
|--------------------|--------------------|--------------------|---|---|---|
| 0.6760596393333316 | 0.1840416783333367 | 0.4552789502821071 | F | F | F |
| 0.3333889893333364 | 0.6053770033333308 | 0.4828946713610023 | F | F | F |
| 0.0732876753333329 | 0.0812696673333306 | 0.4913577008838672 | F | F | F |
| 0.6027163156666688 | 0.8307283486666677 | 0.4810265780372305 | F | F | F |
| 0.1398986823333317 | 0.6760596393333316 | 0.4552789502821071 | F | F | F |
| 0.0612340073333328 | 0.3333889893333364 | 0.4828946713610023 | F | F | F |
| 0.8454426573333365 | 0.0732876753333329 | 0.4913577008838672 | F | F | F |
| 0.5665553356666635 | 0.6027163156666688 | 0.4810265780372305 | F | F | F |
| 0.5157927795144346 | 0.4732687373369373 | 0.5137680585633078 | F | F | F |
| 0.9389780411721915 | 0.3945739458359014 | 0.5412288865474011 | F | F | F |
| 0.4138055884135099 | 0.1792879430058036 | 0.5501013560831254 | F | F | F |
| 0.1643402231079705 | 0.8991522013241848 | 0.5396430093322451 | F | F | F |
| 0.0109384831486281 | 0.5157927795144346 | 0.5137680585633078 | F | F | F |
| 0.6664480129919070 | 0.9389780411721915 | 0.5412288865474011 | F | F | F |
| 0.4069064685806794 | 0.4138055884135099 | 0.5501013560831254 | F | F | F |
| 0.9365075755678447 | 0.1643402231079705 | 0.5396430093322451 | F | F | F |
| 0.4732687373369373 | 0.0109384831486281 | 0.5137680585633078 | F | F | F |
| 0.3945739458359014 | 0.6664480129919070 | 0.5412288865474011 | F | F | F |
| 0.1792879430058036 | 0.4069064685806794 | 0.5501013560831254 | F | F | F |
| 0.8991522013241848 | 0.9365075755678447 | 0.5396430093322451 | F | F | F |
| 0.1502078384511734 | 0.1932397001298156 | 0.5448734685138632 | F | F | F |
| 0.7272745789267816 | 0.2725057257219632 | 0.5171331615441943 | F | F | F |
| 0.2523256400471894 | 0.4873897408432910 | 0.5086482917388153 | F | F | F |
| 0.5022127006463535 | 0.7673910184547594 | 0.5188430143373637 | F | F | F |
| 0.6565524614190181 | 0.1502078384511734 | 0.5448734685138632 | F | F | F |
| 0.0002196953512481 | 0.7272745789267816 | 0.5171331615441943 | F | F | F |
| 0.2602846191095196 | 0.2523256400471894 | 0.5086482917388153 | F | F | F |
| 0.7303962808988871 | 0.5022127006463535 | 0.5188430143373637 | F | F | F |
| 0.1932397001298156 | 0.6565524614190181 | 0.5448734685138632 | F | F | F |
| 0.2725057257219632 | 0.0002196953512481 | 0.5171331615441943 | F | F | F |
| 0.4873897408432910 | 0.2602846191095196 | 0.5086482917388153 | F | F | F |
| 0.7673910184547594 | 0.7303962808988871 | 0.5188430143373637 | F | F | F |
| 0.8182167720331431 | 0.8521352761546723 | 0.6613941308115305 | T | T | T |
| 0.8509935644154378 | 0.8054555330902431 | 0.5727854609830580 | T | T | T |
| 0.2707184130457726 | 0.7296540080500495 | 0.6010097451980740 | T | T | T |
| 0.3982539860180601 | 0.9411793638365362 | 0.6353824859009386 | T | T | T |
| 0.7452414108046371 | 0.5143040828729033 | 0.6079430764210307 | T | T | T |
| 0.9241599726492570 | 0.1491353373888394 | 0.6238776957728629 | T | T | T |
| 0.5009090943031945 | 0.2293206137857491 | 0.5990569786898130 | T | T | T |
| 0.1723446786184748 | 0.4318326741424564 | 0.6387984054078873 | T | T | T |
| 0.3289261308728915 | 0.8190378617314509 | 0.6616715774853508 | T | T | T |
| 0.3426906852888272 | 0.8506083446521682 | 0.5725976361369530 | T | T | T |
| 0.0013610329543771 | 0.2746141478443612 | 0.5982913353021101 | T | T | T |
| 0.6589965392375046 | 0.3967387561094132 | 0.6359077160409781 | T | T | T |

|                    |                    |                    |   |   |   |
|--------------------|--------------------|--------------------|---|---|---|
| 0.7393878897126258 | 0.7476717268122506 | 0.6084789096293481 | T | T | T |
| 0.9135049408228814 | 0.9328251130753568 | 0.6264234760568136 | T | T | T |
| 0.2726543250043146 | 0.4936260219436258 | 0.5983020521012845 | T | T | T |
| 0.3969183107522468 | 0.1658601826981098 | 0.6385287911800793 | T | T | T |
| 0.8546007754884234 | 0.3409916925468366 | 0.6567776507523461 | T | T | T |
| 0.8049428132634586 | 0.3448087086574662 | 0.5725321393087860 | T | T | T |
| 0.7238093945398489 | 0.0005783351489867 | 0.5992471984550224 | T | T | T |
| 0.9406763041962247 | 0.6642400556424589 | 0.6359815643126938 | T | T | T |
| 0.5119437740293011 | 0.7397353010172150 | 0.6085122885773542 | T | T | T |
| 0.1550428054515676 | 0.9298793873482798 | 0.6270038680928881 | T | T | T |
| 0.2346509318406211 | 0.2689929510942909 | 0.5991806974176527 | T | T | T |
| 0.4391049457411028 | 0.3880546901562696 | 0.6397888935153458 | T | T | T |
| 0.4800796967718732 | 0.5262409456085201 | 0.6030966719318729 | T | T | T |
| 0.1790769310731065 | 0.1366369074961551 | 0.6290278800354558 | T | T | T |
| 0.5973282346752969 | 0.0643141083913313 | 0.6593109383101837 | T | T | T |
| 0.0622812341632687 | 0.6032333237987241 | 0.5767937650345566 | T | T | T |
| 0.0751637429212964 | 0.8425521511786916 | 0.6661300729109294 | T | T | T |
| 0.5851513814839309 | 0.8208833937120014 | 0.5669122143997525 | T | T | T |
| 0.8226692509150946 | 0.5786778967917073 | 0.6592974971176098 | T | T | T |
| 0.8354766305165505 | 0.1006899710371574 | 0.5775657648373913 | T | T | T |
| 0.9902550396454221 | 0.4804081852533130 | 0.6055555751710033 | T | T | T |
| 0.6906006033605057 | 0.1727107243807472 | 0.6345640226142359 | T | T | T |
| 0.3341016503387575 | 0.5978493831574765 | 0.6581154757443234 | T | T | T |
| 0.3354535123763951 | 0.0604420223184377 | 0.5760802806128927 | T | T | T |
| 0.1844463921949079 | 0.0909369578037546 | 0.6862838169911611 | T | T | T |
| 0.5906302411547241 | 0.5859514641064503 | 0.5672600459006667 | T | T | T |
| 0.5981924402449854 | 0.8272896000309876 | 0.6598397796049750 | T | T | T |
| 0.0622619339502495 | 0.8368176309777591 | 0.5784730973284451 | T | T | T |
| 0.5282478859532838 | 0.9890297963759205 | 0.6031986665425779 | T | T | T |
| 0.1391862707596971 | 0.6742239001700303 | 0.6308964007519478 | T | T | T |
| 0.0491283595162089 | 0.4020290114699488 | 0.6819526849282137 | T | T | T |
| 0.6061436185695689 | 0.3313932710823648 | 0.5768226017087490 | T | T | T |
| 0.8962214620706817 | 0.1168138599888459 | 0.6772023393386174 | T | T | T |
| 0.8229121040306275 | 0.5932139911817902 | 0.5672601809710648 | T | T | T |
| 0.5697890811978760 | 0.6006284274756795 | 0.6593030242525473 | T | T | T |
| 0.1008500191396297 | 0.0630187803548278 | 0.5774991504833283 | T | T | T |
| 0.1091373767756138 | 0.2521133181066017 | 0.6809136954638830 | T | T | T |

Best+2

In O Pt

1.0000000000000000

14.6383517878741038 0.0000000000000000 0.0000000000000000

7.3191758939370519 12.6771845178323304 0.0000000000000000

0.0000000000000000 0.0000000000000000 37.0694492725965290

In O Pt

64 96 2

Selective dynamics

Direct

|                    |                    |                    |   |   |   |
|--------------------|--------------------|--------------------|---|---|---|
| 0.7611480013333320 | 0.0111480013333320 | 0.6431398506393720 | F | F | F |
| 0.2388520043333315 | 0.9888520043333315 | 0.6539230732949477 | F | F | F |
| 0.7388519966666678 | 0.4888520196666661 | 0.6539230770028368 | F | F | F |
| 0.2611479936666683 | 0.5111480166666666 | 0.6431398543472753 | F | F | F |
| 0.2277039973333359 | 0.7611480013333320 | 0.6431398506393720 | F | F | F |
| 0.7722959913333298 | 0.2388520043333315 | 0.6539230732949477 | F | F | F |
| 0.7722959836666661 | 0.7388519966666678 | 0.6539230770028368 | F | F | F |
| 0.2277039896666651 | 0.2611479936666683 | 0.6431398543472753 | F | F | F |
| 0.0111480013333320 | 0.2277039973333359 | 0.6431398506393720 | F | F | F |
| 0.9888520043333315 | 0.7722959913333369 | 0.6539230732949477 | F | F | F |
| 0.4888520196666661 | 0.7722959836666661 | 0.6539230770028368 | F | F | F |
| 0.5111480166666666 | 0.2277039896666651 | 0.6431398543472753 | F | F | F |
| 0.0000000000000000 | 0.0000000000000000 | 0.6485314633374628 | F | F | F |
| 0.999999846666654  | 0.5000000076666637 | 0.6485314707532766 | F | F | F |
| 0.5000000076666637 | 0.5000000076666637 | 0.6485314707532766 | F | F | F |
| 0.5000000076666637 | 0.999999846666654  | 0.6485314707532766 | F | F | F |
| 0.5714614760499686 | 0.3220635869978707 | 0.7350233487032511 | F | F | F |
| 0.0954565668243177 | 0.3446929456050469 | 0.7238134637074225 | F | F | F |
| 0.5951195294231795 | 0.8450268277640021 | 0.7231766407604923 | F | F | F |
| 0.0713873525637467 | 0.8214752461005688 | 0.7348280063813135 | F | F | F |
| 0.1064749369521607 | 0.5714614760499686 | 0.7350233487032511 | F | F | F |
| 0.5598504875706354 | 0.0954565668243177 | 0.7238134637074225 | F | F | F |
| 0.5598536428128256 | 0.5951195294231795 | 0.7231766407604923 | F | F | F |
| 0.1071374013356774 | 0.0713873525637467 | 0.7348280063813135 | F | F | F |
| 0.3220635869978707 | 0.1064749369521607 | 0.7350233487032511 | F | F | F |
| 0.3446929456050469 | 0.5598504875706354 | 0.7238134637074225 | F | F | F |
| 0.8450268277640021 | 0.5598536428128256 | 0.7231766407604923 | F | F | F |
| 0.8214752461005688 | 0.1071374013356774 | 0.7348280063813135 | F | F | F |
| 0.3333333333333357 | 0.3333333333333357 | 0.7296101269241859 | F | F | F |
| 0.3334481086611234 | 0.8333859062698394 | 0.7290350533343641 | F | F | F |
| 0.8333859062698394 | 0.8331659850690301 | 0.7290350533343641 | F | F | F |
| 0.8331659850690301 | 0.3334481086611234 | 0.7290350533343641 | F | F | F |
| 0.7567783021216402 | 0.0141635649125877 | 0.8879282921078564 | T | T | T |
| 0.9058191499910352 | 0.6555590147039829 | 0.8154267617801993 | T | T | T |
| 0.4274925934457136 | 0.6796794905502040 | 0.8037400104710657 | T | T | T |
| 0.2537019278449346 | 0.9788683556174954 | 0.8956026429805133 | T | T | T |
| 0.7399492871544224 | 0.4953529365223711 | 0.8954413975424722 | T | T | T |
| 0.9292260737523362 | 0.1779675808177130 | 0.8044394353183921 | T | T | T |
| 0.4014215148594864 | 0.1558449014407075 | 0.8154682083526960 | T | T | T |

|                    |                    |                    |   |   |   |
|--------------------|--------------------|--------------------|---|---|---|
| 0.2664859987675509 | 0.5130181359100680 | 0.8822475838775566 | T | T | T |
| 0.2337152749834638 | 0.7576059793475505 | 0.8874643630890405 | T | T | T |
| 0.4418571445805652 | 0.9047163831547247 | 0.8151573462095862 | T | T | T |
| 0.8938503335183914 | 0.4277900915620650 | 0.8036765468510905 | T | T | T |
| 0.7750745776699896 | 0.2435392819693099 | 0.8924393731721452 | T | T | T |
| 0.7720355628518569 | 0.7418537193712215 | 0.8956294676437103 | T | T | T |
| 0.8916364304738413 | 0.9317395344264400 | 0.8043024040932970 | T | T | T |
| 0.4426622364503662 | 0.4025915868488167 | 0.8153331280348671 | T | T | T |
| 0.2195956563771011 | 0.2634219782227034 | 0.8831832480541497 | T | T | T |
| 0.0060403303144622 | 0.2369061047771087 | 0.8870959602187857 | T | T | T |
| 0.6545349044688615 | 0.4408448842401884 | 0.8151435113721940 | T | T | T |
| 0.6798971011584303 | 0.8938401367210279 | 0.8036983319423361 | T | T | T |
| 0.9862860638560809 | 0.7814895460063910 | 0.8921538358441592 | T | T | T |
| 0.4976899645046773 | 0.7658516728806452 | 0.8955002194120447 | T | T | T |
| 0.1791559252857438 | 0.8929093846161182 | 0.8043991166652182 | T | T | T |
| 0.1556733873096670 | 0.4418601664578664 | 0.8154802179123188 | T | T | T |
| 0.5130951143350724 | 0.2210112505523662 | 0.8822985950160266 | T | T | T |
| 0.0128092691667979 | 0.9911309446040935 | 0.8915524625844474 | T | T | T |
| 0.6677492890086525 | 0.6667731560436625 | 0.8088921522671784 | T | T | T |
| 0.9936771448720115 | 0.4987104808764518 | 0.8890766841842808 | T | T | T |
| 0.6672870204905466 | 0.1644525416855187 | 0.8093894498526664 | T | T | T |
| 0.4961312336538503 | 0.5129463038291052 | 0.8890369999728834 | T | T | T |
| 0.1642576537650412 | 0.1660845921673537 | 0.8100692690165651 | T | T | T |
| 0.5144433671416654 | 0.9916920578872219 | 0.8889521106668850 | T | T | T |
| 0.1679093355468005 | 0.6679786947397863 | 0.8095417860712197 | T | T | T |
| 0.8159583373333348 | 0.8601013333333327 | 0.6698389998717786 | F | F | F |
| 0.3946230123333336 | 0.9387660083333316 | 0.6317936634980370 | F | F | F |
| 0.9187303516666674 | 0.1545573616666687 | 0.6201344043196073 | F | F | F |
| 0.1692716669999967 | 0.4334446800000009 | 0.6343672786746026 | F | F | F |
| 0.3239403293333325 | 0.8159583373333348 | 0.6698389998717786 | F | F | F |
| 0.6666109793333348 | 0.3946230123333336 | 0.6317936634980370 | F | F | F |
| 0.9267122866666639 | 0.9187303516666674 | 0.6201344043196073 | F | F | F |
| 0.3972836530000023 | 0.1692716669999967 | 0.6343672786746026 | F | F | F |
| 0.8601013333333327 | 0.3239403293333325 | 0.6698389998717786 | F | F | F |
| 0.9387660083333316 | 0.6666109793333348 | 0.6317936634980370 | F | F | F |
| 0.1545573616666687 | 0.9267122866666639 | 0.6201344043196073 | F | F | F |
| 0.4334446800000009 | 0.3972836530000023 | 0.6343672786746026 | F | F | F |
| 0.1840416783333296 | 0.1398986823333317 | 0.6272239192261537 | F | F | F |
| 0.6053770033333308 | 0.0612340073333328 | 0.6652692555998811 | F | F | F |
| 0.0812696673333306 | 0.8454426573333365 | 0.6769285131661888 | F | F | F |
| 0.8307283486666677 | 0.5665553356666635 | 0.6626956404233155 | F | F | F |
| 0.6760596393333316 | 0.1840416783333367 | 0.6272239192261537 | F | F | F |
| 0.3333889893333364 | 0.6053770033333308 | 0.6652692555998811 | F | F | F |
| 0.0732876753333329 | 0.0812696673333306 | 0.6769285131661888 | F | F | F |

|                    |                    |                    |   |   |   |
|--------------------|--------------------|--------------------|---|---|---|
| 0.6027163156666688 | 0.8307283486666677 | 0.6626956404233155 | F | F | F |
| 0.1398986823333317 | 0.6760596393333316 | 0.6272239192261537 | F | F | F |
| 0.0612340073333328 | 0.3333889893333364 | 0.6652692555998811 | F | F | F |
| 0.8454426573333365 | 0.0732876753333329 | 0.6769285131661888 | F | F | F |
| 0.5665553356666635 | 0.6027163156666688 | 0.6626956404233155 | F | F | F |
| 0.5157927795144346 | 0.4732687373369373 | 0.7078025792003189 | F | F | F |
| 0.9389780411721915 | 0.3945739458359014 | 0.7456345240831368 | F | F | F |
| 0.4138055884135099 | 0.1792879430058036 | 0.7578578546631292 | F | F | F |
| 0.1643402231079705 | 0.8991522013241848 | 0.7434497094289867 | F | F | F |
| 0.0109384831486281 | 0.5157927795144346 | 0.7078025792003189 | F | F | F |
| 0.6664480129919070 | 0.9389780411721915 | 0.7456345240831368 | F | F | F |
| 0.4069064685806794 | 0.4138055884135099 | 0.7578578546631292 | F | F | F |
| 0.9365075755678447 | 0.1643402231079705 | 0.7434497094289867 | F | F | F |
| 0.4732687373369373 | 0.0109384831486281 | 0.7078025792003189 | F | F | F |
| 0.3945739458359014 | 0.6664480129919070 | 0.7456345240831368 | F | F | F |
| 0.1792879430058036 | 0.4069064685806794 | 0.7578578546631292 | F | F | F |
| 0.8991522013241848 | 0.9365075755678447 | 0.7434497094289867 | F | F | F |
| 0.1502078384511734 | 0.1932397001298156 | 0.7506555534619963 | F | F | F |
| 0.7272745789267816 | 0.2725057257219632 | 0.7124385789076726 | F | F | F |
| 0.2523256400471894 | 0.4873897408432910 | 0.7007492326504874 | F | F | F |
| 0.5022127006463535 | 0.7673910184547594 | 0.7147941909331479 | F | F | F |
| 0.6565524614190181 | 0.1502078384511734 | 0.7506555534619963 | F | F | F |
| 0.0002196953512481 | 0.7272745789267816 | 0.7124385789076726 | F | F | F |
| 0.2602846191095196 | 0.2523256400471894 | 0.7007492326504874 | F | F | F |
| 0.7303962808988871 | 0.5022127006463535 | 0.7147941909331479 | F | F | F |
| 0.1932397001298156 | 0.6565524614190181 | 0.7506555534619963 | F | F | F |
| 0.2725057257219632 | 0.0002196953512481 | 0.7124385789076726 | F | F | F |
| 0.4873897408432910 | 0.2602846191095196 | 0.7007492326504874 | F | F | F |
| 0.7673910184547594 | 0.7303962808988871 | 0.7147941909331479 | F | F | F |
| 0.8216684199427359 | 0.8539825968960270 | 0.9099159216686334 | T | T | T |
| 0.8515471431769399 | 0.8066955821314745 | 0.7886391145931245 | T | T | T |
| 0.2728279885689363 | 0.7282481528882186 | 0.8269939361594394 | T | T | T |
| 0.4055714081517658 | 0.9389483528147184 | 0.8742265141768795 | T | T | T |
| 0.7479524751327923 | 0.5132370770060517 | 0.8376250273349130 | T | T | T |
| 0.9251540775529145 | 0.1497088551583941 | 0.8634871743487380 | T | T | T |
| 0.4946610529796648 | 0.2323519236556065 | 0.8236920182158584 | T | T | T |
| 0.1727427355843801 | 0.4374520824913907 | 0.8805215512175534 | T | T | T |
| 0.3389307083028112 | 0.8103386769001166 | 0.9085529820865327 | T | T | T |
| 0.3446614477459236 | 0.8505959550143706 | 0.7884087017582960 | T | T | T |
| 0.9985481054841928 | 0.2736420181730811 | 0.8273118516356028 | T | T | T |
| 0.6580912471804083 | 0.4001403784372292 | 0.8742371622932611 | T | T | T |
| 0.7407244204603239 | 0.7480692816007440 | 0.8379522720137821 | T | T | T |
| 0.9183806551421172 | 0.9351226201237891 | 0.8632670998058047 | T | T | T |
| 0.2733608173649789 | 0.4944271403518488 | 0.8234951539080011 | T | T | T |

|                    |                     |                    |   |   |   |
|--------------------|---------------------|--------------------|---|---|---|
| 0.3895576964109894 | 0.1712045169369114  | 0.8803229198178733 | T | T | T |
| 0.8479131955154792 | 0.3355146110864695  | 0.9092149440604886 | T | T | T |
| 0.8061224167923052 | 0.3436800025385852  | 0.7886114415883395 | T | T | T |
| 0.7273956165656464 | -0.0003418327224942 | 0.8272548687971860 | T | T | T |
| 0.9437120813211386 | 0.6626242490512806  | 0.8747713638477290 | T | T | T |
| 0.5146751082520327 | 0.7387159790338881  | 0.8376087617362644 | T | T | T |
| 0.1612408527992589 | 0.9270346385832996  | 0.8628351197943809 | T | T | T |
| 0.2303783609953618 | 0.2722296158304058  | 0.8243346430032422 | T | T | T |
| 0.4392644986918037 | 0.3896349402082010  | 0.8803432420273900 | T | T | T |
| 0.4807281246603534 | 0.5273574525491141  | 0.8304598561486471 | T | T | T |
| 0.1802519094846177 | 0.1377036576571196  | 0.8693371391933880 | T | T | T |
| 0.5971988285565499 | 0.0679646153439105  | 0.9069513038781762 | T | T | T |
| 0.0624983367181867 | 0.6055939142595456  | 0.7936937310474911 | T | T | T |
| 0.0845723096621966 | 0.8345102762913433  | 0.9169100027247978 | T | T | T |
| 0.5865972975380344 | 0.8221922239643112  | 0.7811161594973799 | T | T | T |
| 0.8288308814320325 | 0.5754900185897931  | 0.9074428016131764 | T | T | T |
| 0.8352667495937337 | 0.1023049799909496  | 0.7957642963342366 | T | T | T |
| 0.9923021217304846 | 0.4822675070027033  | 0.8306555042552007 | T | T | T |
| 0.6766560865093706 | 0.1846970892721512  | 0.8678104047350909 | T | T | T |
| 0.3369022769249641 | 0.5960014856442005  | 0.9068433993602376 | T | T | T |
| 0.3321757116726805 | 0.0619325889159539  | 0.7939761699495769 | T | T | T |
| 0.2205433035045509 | 0.0532044115376150  | 0.9488691191551308 | T | T | T |
| 0.5927096178266287 | 0.5857436520387493  | 0.7809972580196154 | T | T | T |
| 0.6039704990254481 | 0.8267412889428046  | 0.9076876645957032 | T | T | T |
| 0.0623850281431977 | 0.8375290623754458  | 0.7966868718575171 | T | T | T |
| 0.5274407423127682 | 0.9935449637791898  | 0.8302835475336721 | T | T | T |
| 0.1403789486288187 | 0.6736172373514783  | 0.8678424445981796 | T | T | T |
| 0.0649163454251697 | 0.3390887625717769  | 0.9065102344238314 | T | T | T |
| 0.6055852030194766 | 0.3325255072954721  | 0.7937224340995118 | T | T | T |
| 0.7860993433644373 | 0.1209957712423644  | 0.9291461138287807 | T | T | T |
| 0.8228967706059348 | 0.5927670112132266  | 0.7811355996620342 | T | T | T |
| 0.5752138292579170 | 0.5986052380958981  | 0.9083214198403441 | T | T | T |
| 0.1001079762695842 | 0.0631669492187278  | 0.7957696641750089 | T | T | T |
| 0.0766336887304441 | 0.0932829050695970  | 0.9427985841090499 | T | T | T |
| 0.9189957165089500 | 0.0791950741243674  | 0.9534374048241716 | T | T | T |

Best + 3

In O Pt

1.0000000000000000

14.6383517878741038 0.0000000000000000 0.0000000000000000

7.3191758939370519 12.6771845178323304 0.0000000000000000

0.0000000000000000 0.0000000000000000 37.0694492725965290

In O Pt

## Selective dynamics

## Direct

|                    |                    |                    |   |   |   |
|--------------------|--------------------|--------------------|---|---|---|
| 0.7611480013333320 | 0.0111480013333320 | 0.6431398506393720 | F | F | F |
| 0.2388520043333315 | 0.9888520043333315 | 0.6539230732949477 | F | F | F |
| 0.7388519966666678 | 0.4888520196666661 | 0.6539230770028368 | F | F | F |
| 0.2611479936666683 | 0.5111480166666666 | 0.6431398543472753 | F | F | F |
| 0.2277039973333359 | 0.7611480013333320 | 0.6431398506393720 | F | F | F |
| 0.7722959913333298 | 0.2388520043333315 | 0.6539230732949477 | F | F | F |
| 0.7722959836666661 | 0.7388519966666678 | 0.6539230770028368 | F | F | F |
| 0.2277039896666651 | 0.2611479936666683 | 0.6431398543472753 | F | F | F |
| 0.0111480013333320 | 0.2277039973333359 | 0.6431398506393720 | F | F | F |
| 0.9888520043333315 | 0.7722959913333369 | 0.6539230732949477 | F | F | F |
| 0.4888520196666661 | 0.7722959836666661 | 0.6539230770028368 | F | F | F |
| 0.5111480166666666 | 0.2277039896666651 | 0.6431398543472753 | F | F | F |
| 0.0000000000000000 | 0.0000000000000000 | 0.6485314633374628 | F | F | F |
| 0.9999999846666654 | 0.5000000076666637 | 0.6485314707532766 | F | F | F |
| 0.5000000076666637 | 0.5000000076666637 | 0.6485314707532766 | F | F | F |
| 0.5000000076666637 | 0.9999999846666654 | 0.6485314707532766 | F | F | F |
| 0.5714614760499686 | 0.3220635869978707 | 0.7350233487032511 | F | F | F |
| 0.0954565668243177 | 0.3446929456050469 | 0.7238134637074225 | F | F | F |
| 0.5951195294231795 | 0.8450268277640021 | 0.7231766407604923 | F | F | F |
| 0.0713873525637467 | 0.8214752461005688 | 0.7348280063813135 | F | F | F |
| 0.1064749369521607 | 0.5714614760499686 | 0.7350233487032511 | F | F | F |
| 0.5598504875706354 | 0.0954565668243177 | 0.7238134637074225 | F | F | F |
| 0.5598536428128256 | 0.5951195294231795 | 0.7231766407604923 | F | F | F |
| 0.1071374013356774 | 0.0713873525637467 | 0.7348280063813135 | F | F | F |
| 0.3220635869978707 | 0.1064749369521607 | 0.7350233487032511 | F | F | F |
| 0.3446929456050469 | 0.5598504875706354 | 0.7238134637074225 | F | F | F |
| 0.8450268277640021 | 0.5598536428128256 | 0.7231766407604923 | F | F | F |
| 0.8214752461005688 | 0.1071374013356774 | 0.7348280063813135 | F | F | F |
| 0.3333333333333357 | 0.3333333333333357 | 0.7296101269241859 | F | F | F |
| 0.3334481086611234 | 0.8333859062698394 | 0.7290350533343641 | F | F | F |
| 0.8333859062698394 | 0.8331659850690301 | 0.7290350533343641 | F | F | F |
| 0.8331659850690301 | 0.3334481086611234 | 0.7290350533343641 | F | F | F |
| 0.7583467922487357 | 0.0081172831061099 | 0.8872180212876030 | T | T | T |
| 0.9051109080285460 | 0.6558938976883597 | 0.8154261511099867 | T | T | T |
| 0.4263570929128944 | 0.6795100732231363 | 0.8040829563187599 | T | T | T |
| 0.2459510215260349 | 0.9781819737607453 | 0.8941274754774824 | T | T | T |
| 0.7317736406071984 | 0.5048936417594742 | 0.8957853850456924 | T | T | T |
| 0.9277930157066825 | 0.1786111094247445 | 0.8046751989660109 | T | T | T |
| 0.4012007196028533 | 0.1555447102454676 | 0.8152441218396407 | T | T | T |
| 0.2664259322426315 | 0.5143263761380558 | 0.8823005969351141 | T | T | T |
| 0.2254982178373337 | 0.7613067686188651 | 0.8884962737876735 | T | T | T |

|                    |                     |                    |   |   |   |
|--------------------|---------------------|--------------------|---|---|---|
| 0.4402155344614129 | 0.9047822109918608  | 0.8151770211633785 | T | T | T |
| 0.8930949502183008 | 0.4286874005778473  | 0.8034708739391903 | T | T | T |
| 0.7724235978200342 | 0.2294683315242937  | 0.8952986300299657 | T | T | T |
| 0.7686072137397296 | 0.7432042574266752  | 0.8954097346685185 | T | T | T |
| 0.8921181272500934 | 0.9301386614080032  | 0.8039539444280434 | T | T | T |
| 0.4425718075065075 | 0.4026761500797486  | 0.8154248017675602 | T | T | T |
| 0.2202577484574185 | 0.2658258078856852  | 0.8823002156064119 | T | T | T |
| 0.0096572315160390 | 0.2366443313183375  | 0.8852531591792185 | T | T | T |
| 0.6557676378380684 | 0.4392552374830551  | 0.8162969531476925 | T | T | T |
| 0.6788247398485375 | 0.8940356117689255  | 0.8036262623564664 | T | T | T |
| 0.9843490346376830 | 0.7803621104561363  | 0.8925419734759328 | T | T | T |
| 0.4920556805581972 | 0.7687853916487277  | 0.8952160113279999 | T | T | T |
| 0.1761534690493616 | 0.8941428197213197  | 0.8053406122867710 | T | T | T |
| 0.1553389341404931 | 0.4430722481813992  | 0.8154839432888640 | T | T | T |
| 0.5112193567651189 | 0.2202652027581972  | 0.8823365004732243 | T | T | T |
| 0.9941583919813173 | -0.0017146611599264 | 0.8960579895380041 | T | T | T |
| 0.6662199597476633 | 0.6672080460885913  | 0.8085766243665446 | T | T | T |
| 0.9913649442317745 | 0.4998145796498855  | 0.8889133991440503 | T | T | T |
| 0.6667188985002709 | 0.1643793795819097  | 0.8095303626335918 | T | T | T |
| 0.4964163639551206 | 0.5108075772263616  | 0.8899563163511504 | T | T | T |
| 0.1644584311965089 | 0.1660769067382879  | 0.8097613495515998 | T | T | T |
| 0.5121938440627942 | 0.9914035974612034  | 0.8889693020870351 | T | T | T |
| 0.1674256413272447 | 0.6690697556624359  | 0.8096415014866666 | T | T | T |
| 0.8159583373333348 | 0.8601013333333327  | 0.6698389998717786 | F | F | F |
| 0.3946230123333336 | 0.9387660083333316  | 0.6317936634980370 | F | F | F |
| 0.9187303516666674 | 0.1545573616666687  | 0.6201344043196073 | F | F | F |
| 0.1692716669999967 | 0.4334446800000009  | 0.6343672786746026 | F | F | F |
| 0.3239403293333325 | 0.8159583373333348  | 0.6698389998717786 | F | F | F |
| 0.6666109793333348 | 0.3946230123333336  | 0.6317936634980370 | F | F | F |
| 0.9267122866666639 | 0.9187303516666674  | 0.6201344043196073 | F | F | F |
| 0.3972836530000023 | 0.1692716669999967  | 0.6343672786746026 | F | F | F |
| 0.8601013333333327 | 0.3239403293333325  | 0.6698389998717786 | F | F | F |
| 0.9387660083333316 | 0.6666109793333348  | 0.6317936634980370 | F | F | F |
| 0.1545573616666687 | 0.9267122866666639  | 0.6201344043196073 | F | F | F |
| 0.4334446800000009 | 0.3972836530000023  | 0.6343672786746026 | F | F | F |
| 0.1840416783333296 | 0.1398986823333317  | 0.6272239192261537 | F | F | F |
| 0.6053770033333308 | 0.0612340073333328  | 0.6652692555998811 | F | F | F |
| 0.0812696673333306 | 0.8454426573333365  | 0.6769285131661888 | F | F | F |
| 0.8307283486666677 | 0.5665553356666635  | 0.6626956404233155 | F | F | F |
| 0.6760596393333316 | 0.1840416783333367  | 0.6272239192261537 | F | F | F |
| 0.3333889893333364 | 0.6053770033333308  | 0.6652692555998811 | F | F | F |
| 0.0732876753333329 | 0.0812696673333306  | 0.6769285131661888 | F | F | F |
| 0.6027163156666688 | 0.8307283486666677  | 0.6626956404233155 | F | F | F |
| 0.1398986823333317 | 0.6760596393333316  | 0.6272239192261537 | F | F | F |



|                     |                    |                    |   |   |   |
|---------------------|--------------------|--------------------|---|---|---|
| 0.0612340073333328  | 0.3333889893333364 | 0.6652692555998811 | F | F | F |
| 0.8454426573333365  | 0.0732876753333329 | 0.6769285131661888 | F | F | F |
| 0.5665553356666635  | 0.6027163156666688 | 0.6626956404233155 | F | F | F |
| 0.5157927795144346  | 0.4732687373369373 | 0.7078025792003189 | F | F | F |
| 0.9389780411721915  | 0.3945739458359014 | 0.7456345240831368 | F | F | F |
| 0.4138055884135099  | 0.1792879430058036 | 0.7578578546631292 | F | F | F |
| 0.1643402231079705  | 0.8991522013241848 | 0.7434497094289867 | F | F | F |
| 0.0109384831486281  | 0.5157927795144346 | 0.7078025792003189 | F | F | F |
| 0.6664480129919070  | 0.9389780411721915 | 0.7456345240831368 | F | F | F |
| 0.4069064685806794  | 0.4138055884135099 | 0.7578578546631292 | F | F | F |
| 0.9365075755678447  | 0.1643402231079705 | 0.7434497094289867 | F | F | F |
| 0.4732687373369373  | 0.0109384831486281 | 0.7078025792003189 | F | F | F |
| 0.3945739458359014  | 0.6664480129919070 | 0.7456345240831368 | F | F | F |
| 0.1792879430058036  | 0.4069064685806794 | 0.7578578546631292 | F | F | F |
| 0.8991522013241848  | 0.9365075755678447 | 0.7434497094289867 | F | F | F |
| 0.1502078384511734  | 0.1932397001298156 | 0.7506555534619963 | F | F | F |
| 0.7272745789267816  | 0.2725057257219632 | 0.7124385789076726 | F | F | F |
| 0.2523256400471894  | 0.4873897408432910 | 0.7007492326504874 | F | F | F |
| 0.5022127006463535  | 0.7673910184547594 | 0.7147941909331479 | F | F | F |
| 0.6565524614190181  | 0.1502078384511734 | 0.7506555534619963 | F | F | F |
| 0.0002196953512481  | 0.7272745789267816 | 0.7124385789076726 | F | F | F |
| 0.2602846191095196  | 0.2523256400471894 | 0.7007492326504874 | F | F | F |
| 0.7303962808988871  | 0.5022127006463535 | 0.7147941909331479 | F | F | F |
| 0.1932397001298156  | 0.6565524614190181 | 0.7506555534619963 | F | F | F |
| 0.2725057257219632  | 0.0002196953512481 | 0.7124385789076726 | F | F | F |
| 0.4873897408432910  | 0.2602846191095196 | 0.7007492326504874 | F | F | F |
| 0.7673910184547594  | 0.7303962808988871 | 0.7147941909331479 | F | F | F |
| 0.8194833184471516  | 0.8510066089834695 | 0.9105832603999054 | T | T | T |
| 0.8503152479931243  | 0.8062398467646065 | 0.7883512383944689 | T | T | T |
| 0.2718671764502967  | 0.7295036229473512 | 0.8276013593262317 | T | T | T |
| 0.4001086316785929  | 0.9416117887252499 | 0.8742623519389295 | T | T | T |
| 0.7469212905603918  | 0.5137752098921083 | 0.8380931012260410 | T | T | T |
| 0.9185724405516280  | 0.1623024153878072 | 0.8636079451213673 | T | T | T |
| 0.4927460445617567  | 0.2333379143197359 | 0.8235051586212901 | T | T | T |
| 0.1727408317041786  | 0.4388780047817403 | 0.8798821449939457 | T | T | T |
| 0.3345701137094551  | 0.8105594378398326 | 0.9071677974986334 | T | T | T |
| 0.3425265395319252  | 0.8511728408590273 | 0.7887226930718781 | T | T | T |
| -0.0007275239414210 | 0.2746896210903640 | 0.8264992714502322 | T | T | T |
| 0.6660667113194053  | 0.3971670177506720 | 0.8776769879840811 | T | T | T |
| 0.7393873816670760  | 0.7481718420025539 | 0.8376125410830016 | T | T | T |
| 0.9227311214669791  | 0.9249494499312523 | 0.8610147112242018 | T | T | T |
| 0.2734920219131635  | 0.4960234669768153 | 0.8234389976514686 | T | T | T |
| 0.3886864677037996  | 0.1713346718843602 | 0.8802496229889345 | T | T | T |
| 0.8651627580554868  | 0.3643330260018492 | 0.9167931108658076 | T | T | T |

|                    |                     |                    |   |   |   |
|--------------------|---------------------|--------------------|---|---|---|
| 0.8055262018456099 | 0.3444092980600854  | 0.7886205501925448 | T | T | T |
| 0.7260752713128320 | -0.0000031456224479 | 0.8269514518202792 | T | T | T |
| 0.9430511436061478 | 0.6619543139101912  | 0.8745361597616206 | T | T | T |
| 0.5137382511566843 | 0.7388490109725246  | 0.8375988750974979 | T | T | T |
| 0.1468893666013607 | 0.9312906987108894  | 0.8642601622396282 | T | T | T |
| 0.2299447127329992 | 0.2726842598756329  | 0.8236776360605489 | T | T | T |
| 0.4392350703510561 | 0.3894558778773602  | 0.8807814770278147 | T | T | T |
| 0.4832639936611511 | 0.5256396502522602  | 0.8313604531632061 | T | T | T |
| 0.1812652192960649 | 0.1375535142680163  | 0.8695013222987521 | T | T | T |
| 0.5960960534716434 | 0.0663613086237386  | 0.9067232454054737 | T | T | T |
| 0.0621741051804059 | 0.6060589981267881  | 0.7936789324600376 | T | T | T |
| 0.0765943654231784 | 0.8380331937098798  | 0.9190793851104462 | T | T | T |
| 0.5854485209625452 | 0.8224933862651533  | 0.7809794450750688 | T | T | T |
| 0.8257024091723648 | 0.5789545343291806  | 0.9072642996586470 | T | T | T |
| 0.8349913430706720 | 0.1018856591518505  | 0.7959406411496540 | T | T | T |
| 0.9914288796513605 | 0.4827743031476286  | 0.8304927177883629 | T | T | T |
| 0.6710446471470723 | 0.1852109074567864  | 0.8682157447144728 | T | T | T |
| 0.3356145027266553 | 0.5974124644741010  | 0.9069558347579183 | T | T | T |
| 0.3314875903182966 | 0.0621671296784152  | 0.7937769746935018 | T | T | T |
| 0.1878264169819772 | 0.0266020242027008  | 0.9476891007485522 | T | T | T |
| 0.5918910139427179 | 0.5851752359030470  | 0.7813249016034316 | T | T | T |
| 0.5999124192043886 | 0.8271823532202564  | 0.9077548623133801 | T | T | T |
| 0.0630481349555921 | 0.8364680590585515  | 0.7957021966508321 | T | T | T |
| 0.5257719046923301 | 0.9927938405271359  | 0.8303045506522969 | T | T | T |
| 0.1397061220052385 | 0.6749900440494080  | 0.8682560687865436 | T | T | T |
| 0.0672044455142700 | 0.3396308611592680  | 0.9055619377986523 | T | T | T |
| 0.6057269632684713 | 0.3325318805527233  | 0.7940919190572562 | T | T | T |
| 0.8354435033563559 | 0.0736709924516080  | 0.9190531169888966 | T | T | T |
| 0.8216496334727122 | 0.5928799766520123  | 0.7810820849526410 | T | T | T |
| 0.5691320231059362 | 0.6023049073808272  | 0.9091806799593563 | T | T | T |
| 0.0991852392451283 | 0.0638815553411554  | 0.7960329004858251 | T | T | T |
| 0.0397335306896175 | 0.1175775668825870  | 0.9437747650716598 | T | T | T |
| 0.8558515796632412 | 0.2708395993759817  | 0.9515673074900680 | T | T | T |

Best + 4

In O Pt

1.0000000000000000

14.6383517878741038 0.0000000000000000 0.0000000000000000

7.3191758939370519 12.6771845178323304 0.0000000000000000

0.0000000000000000 0.0000000000000000 37.0694492725965290

In O Pt

64 96 2

Selective dynamics

Direct

|                    |                    |                    |   |   |   |
|--------------------|--------------------|--------------------|---|---|---|
| 0.7611480013333320 | 0.0111480013333320 | 0.6431398506393720 | F | F | F |
| 0.2388520043333315 | 0.9888520043333315 | 0.6539230732949477 | F | F | F |
| 0.7388519966666678 | 0.4888520196666661 | 0.6539230770028368 | F | F | F |
| 0.2611479936666683 | 0.5111480166666666 | 0.6431398543472753 | F | F | F |
| 0.2277039973333359 | 0.7611480013333320 | 0.6431398506393720 | F | F | F |
| 0.7722959913333298 | 0.2388520043333315 | 0.6539230732949477 | F | F | F |
| 0.7722959836666661 | 0.7388519966666678 | 0.6539230770028368 | F | F | F |
| 0.2277039896666651 | 0.2611479936666683 | 0.6431398543472753 | F | F | F |
| 0.0111480013333320 | 0.2277039973333359 | 0.6431398506393720 | F | F | F |
| 0.9888520043333315 | 0.7722959913333369 | 0.6539230732949477 | F | F | F |
| 0.4888520196666661 | 0.7722959836666661 | 0.6539230770028368 | F | F | F |
| 0.5111480166666666 | 0.2277039896666651 | 0.6431398543472753 | F | F | F |
| 0.0000000000000000 | 0.0000000000000000 | 0.6485314633374628 | F | F | F |
| 0.9999999846666654 | 0.5000000076666637 | 0.6485314707532766 | F | F | F |
| 0.5000000076666637 | 0.5000000076666637 | 0.6485314707532766 | F | F | F |
| 0.5000000076666637 | 0.9999999846666654 | 0.6485314707532766 | F | F | F |
| 0.5714614760499686 | 0.3220635869978707 | 0.7350233487032511 | F | F | F |
| 0.0954565668243177 | 0.3446929456050469 | 0.7238134637074225 | F | F | F |
| 0.5951195294231795 | 0.8450268277640021 | 0.7231766407604923 | F | F | F |
| 0.0713873525637467 | 0.8214752461005688 | 0.7348280063813135 | F | F | F |
| 0.1064749369521607 | 0.5714614760499686 | 0.7350233487032511 | F | F | F |
| 0.5598504875706354 | 0.0954565668243177 | 0.7238134637074225 | F | F | F |
| 0.5598536428128256 | 0.5951195294231795 | 0.7231766407604923 | F | F | F |
| 0.1071374013356774 | 0.0713873525637467 | 0.7348280063813135 | F | F | F |
| 0.3220635869978707 | 0.1064749369521607 | 0.7350233487032511 | F | F | F |
| 0.3446929456050469 | 0.5598504875706354 | 0.7238134637074225 | F | F | F |
| 0.8450268277640021 | 0.5598536428128256 | 0.7231766407604923 | F | F | F |
| 0.8214752461005688 | 0.1071374013356774 | 0.7348280063813135 | F | F | F |
| 0.3333333333333357 | 0.3333333333333357 | 0.7296101269241859 | F | F | F |
| 0.3334481086611234 | 0.8333859062698394 | 0.7290350533343641 | F | F | F |
| 0.8333859062698394 | 0.8331659850690301 | 0.7290350533343641 | F | F | F |
| 0.8331659850690301 | 0.3334481086611234 | 0.7290350533343641 | F | F | F |
| 0.7523151156239178 | 0.0113137647510428 | 0.8869589917918276 | T | T | T |
| 0.9046388296604151 | 0.6552771291715328 | 0.8155251341445088 | T | T | T |
| 0.4282376732844665 | 0.6775451453610775 | 0.8038771973485052 | T | T | T |
| 0.2464479694297225 | 0.9792391588032435 | 0.8932899887256005 | T | T | T |
| 0.7414234442136031 | 0.4875389017947699 | 0.8965202353845105 | T | T | T |
| 0.9286563784292909 | 0.1814729594377270 | 0.8035188097327687 | T | T | T |
| 0.4007913434438577 | 0.1560492111972895 | 0.8154568849126655 | T | T | T |
| 0.2647153336421509 | 0.5171982895635195 | 0.8839028817829061 | T | T | T |
| 0.2357806191049792 | 0.7591712950298323 | 0.8915527623874975 | T | T | T |
| 0.4408397133837151 | 0.9048616431371658 | 0.8152103456532586 | T | T | T |
| 0.8941240693278846 | 0.4275604469104758 | 0.8039127743213431 | T | T | T |

|                    |                     |                    |   |   |   |
|--------------------|---------------------|--------------------|---|---|---|
| 0.7782531092512573 | 0.2325312010869539  | 0.8960806482310256 | T | T | T |
| 0.7661274766950644 | 0.7386210217556367  | 0.8958916012365733 | T | T | T |
| 0.8890352763458640 | 0.9296267663044658  | 0.8023664102935740 | T | T | T |
| 0.4412645337352344 | 0.4039217754305164  | 0.8155767751684746 | T | T | T |
| 0.2185408823933724 | 0.2670109155528416  | 0.8829420674989868 | T | T | T |
| 0.0089018851093849 | 0.2372320327993766  | 0.8908440572687625 | T | T | T |
| 0.6557240238338859 | 0.4388085790112560  | 0.8163360143969624 | T | T | T |
| 0.6778733075825810 | 0.8936599367195041  | 0.8036334120992265 | T | T | T |
| 0.9760634799095055 | 0.7813937071522634  | 0.8948978211477656 | T | T | T |
| 0.4980516753742796 | 0.7639107548815720  | 0.8955382355894065 | T | T | T |
| 0.1824549532465024 | 0.8883948863011847  | 0.8027478683283837 | T | T | T |
| 0.1556374069977085 | 0.4434789289155694  | 0.8155993315931630 | T | T | T |
| 0.5106115933534218 | 0.2223895248206528  | 0.8828957619019647 | T | T | T |
| 0.0018625617104938 | -0.0012596569094935 | 0.8774383354858388 | T | T | T |
| 0.6671083808516841 | 0.6654073673623511  | 0.8090906175140150 | T | T | T |
| 0.9917284635686731 | 0.5001214828508282  | 0.8891253778174066 | T | T | T |
| 0.6670978605305654 | 0.1659394984511193  | 0.8097835255652610 | T | T | T |
| 0.4984518361341262 | 0.5091543460948844  | 0.8898868755642386 | T | T | T |
| 0.1626417547893625 | 0.1670904234247809  | 0.8102184826258606 | T | T | T |
| 0.5108189112793802 | 0.9926397634104090  | 0.8891623889671063 | T | T | T |
| 0.1669051162653416 | 0.6709845031876041  | 0.8105754863586226 | T | T | T |
| 0.8159583373333348 | 0.8601013333333327  | 0.6698389998717786 | F | F | F |
| 0.3946230123333336 | 0.9387660083333316  | 0.6317936634980370 | F | F | F |
| 0.9187303516666674 | 0.1545573616666687  | 0.6201344043196073 | F | F | F |
| 0.1692716669999967 | 0.4334446800000009  | 0.6343672786746026 | F | F | F |
| 0.3239403293333325 | 0.8159583373333348  | 0.6698389998717786 | F | F | F |
| 0.6666109793333348 | 0.3946230123333336  | 0.6317936634980370 | F | F | F |
| 0.9267122866666639 | 0.9187303516666674  | 0.6201344043196073 | F | F | F |
| 0.3972836530000023 | 0.1692716669999967  | 0.6343672786746026 | F | F | F |
| 0.8601013333333327 | 0.3239403293333325  | 0.6698389998717786 | F | F | F |
| 0.9387660083333316 | 0.6666109793333348  | 0.6317936634980370 | F | F | F |
| 0.1545573616666687 | 0.9267122866666639  | 0.6201344043196073 | F | F | F |
| 0.4334446800000009 | 0.3972836530000023  | 0.6343672786746026 | F | F | F |
| 0.1840416783333296 | 0.1398986823333317  | 0.6272239192261537 | F | F | F |
| 0.6053770033333308 | 0.0612340073333328  | 0.6652692555998811 | F | F | F |
| 0.0812696673333306 | 0.8454426573333365  | 0.6769285131661888 | F | F | F |
| 0.8307283486666677 | 0.5665553356666635  | 0.6626956404233155 | F | F | F |
| 0.6760596393333316 | 0.1840416783333367  | 0.6272239192261537 | F | F | F |
| 0.3333889893333364 | 0.6053770033333308  | 0.6652692555998811 | F | F | F |
| 0.0732876753333329 | 0.0812696673333306  | 0.6769285131661888 | F | F | F |
| 0.6027163156666688 | 0.8307283486666677  | 0.6626956404233155 | F | F | F |
| 0.1398986823333317 | 0.6760596393333316  | 0.6272239192261537 | F | F | F |
| 0.0612340073333328 | 0.3333889893333364  | 0.6652692555998811 | F | F | F |
| 0.8454426573333365 | 0.0732876753333329  | 0.6769285131661888 | F | F | F |

|                     |                    |                    |   |   |   |
|---------------------|--------------------|--------------------|---|---|---|
| 0.5665553356666635  | 0.6027163156666688 | 0.6626956404233155 | F | F | F |
| 0.5157927795144346  | 0.4732687373369373 | 0.7078025792003189 | F | F | F |
| 0.9389780411721915  | 0.3945739458359014 | 0.7456345240831368 | F | F | F |
| 0.4138055884135099  | 0.1792879430058036 | 0.7578578546631292 | F | F | F |
| 0.1643402231079705  | 0.8991522013241848 | 0.7434497094289867 | F | F | F |
| 0.0109384831486281  | 0.5157927795144346 | 0.7078025792003189 | F | F | F |
| 0.6664480129919070  | 0.9389780411721915 | 0.7456345240831368 | F | F | F |
| 0.4069064685806794  | 0.4138055884135099 | 0.7578578546631292 | F | F | F |
| 0.9365075755678447  | 0.1643402231079705 | 0.7434497094289867 | F | F | F |
| 0.4732687373369373  | 0.0109384831486281 | 0.7078025792003189 | F | F | F |
| 0.3945739458359014  | 0.6664480129919070 | 0.7456345240831368 | F | F | F |
| 0.1792879430058036  | 0.4069064685806794 | 0.7578578546631292 | F | F | F |
| 0.8991522013241848  | 0.9365075755678447 | 0.7434497094289867 | F | F | F |
| 0.1502078384511734  | 0.1932397001298156 | 0.7506555534619963 | F | F | F |
| 0.7272745789267816  | 0.2725057257219632 | 0.7124385789076726 | F | F | F |
| 0.2523256400471894  | 0.4873897408432910 | 0.7007492326504874 | F | F | F |
| 0.5022127006463535  | 0.7673910184547594 | 0.7147941909331479 | F | F | F |
| 0.6565524614190181  | 0.1502078384511734 | 0.7506555534619963 | F | F | F |
| 0.0002196953512481  | 0.7272745789267816 | 0.7124385789076726 | F | F | F |
| 0.2602846191095196  | 0.2523256400471894 | 0.7007492326504874 | F | F | F |
| 0.7303962808988871  | 0.5022127006463535 | 0.7147941909331479 | F | F | F |
| 0.1932397001298156  | 0.6565524614190181 | 0.7506555534619963 | F | F | F |
| 0.2725057257219632  | 0.0002196953512481 | 0.7124385789076726 | F | F | F |
| 0.4873897408432910  | 0.2602846191095196 | 0.7007492326504874 | F | F | F |
| 0.7673910184547594  | 0.7303962808988871 | 0.7147941909331479 | F | F | F |
| 0.8101308327857126  | 0.8546681095482904 | 0.9102582925985550 | T | T | T |
| 0.8495603575362634  | 0.8054012138289334 | 0.7883342628569123 | T | T | T |
| 0.2749272041939994  | 0.7251557131995536 | 0.8276127915678735 | T | T | T |
| 0.3999634428936619  | 0.9418445537562825 | 0.8742340829965649 | T | T | T |
| 0.7484647927898500  | 0.5109975108552643 | 0.8386888467938624 | T | T | T |
| 0.9228514999574985  | 0.1587992518762631 | 0.8630180875568501 | T | T | T |
| 0.4939490622051073  | 0.2333473756966700 | 0.8241645108670216 | T | T | T |
| 0.1716507476297464  | 0.4411012341712334 | 0.8806604774414872 | T | T | T |
| 0.3397046827171993  | 0.8136573189453020 | 0.9096115773785151 | T | T | T |
| 0.3454426636786163  | 0.8495812633160033 | 0.7883400144256164 | T | T | T |
| -0.0014910419959030 | 0.2743534825623347 | 0.8281675756934024 | T | T | T |
| 0.6618466957440521  | 0.3931808916542950 | 0.8762703979892771 | T | T | T |
| 0.7391606600203926  | 0.7473343562802612 | 0.8380173041464259 | T | T | T |
| 0.9187069844670467  | 0.9214218642528216 | 0.8594166067754453 | T | T | T |
| 0.2712065569970895  | 0.5000534770166808 | 0.8251969796281988 | T | T | T |
| 0.3873810925525010  | 0.1724733458838778 | 0.8804528155658188 | T | T | T |
| 0.8489868917606902  | 0.3264931375490255 | 0.9129959244718532 | T | T | T |
| 0.8053514282233246  | 0.3444883226605002 | 0.7884259867773680 | T | T | T |
| 0.7240815208344673  | 0.0016695217755928 | 0.8266494962088410 | T | T | T |

|                    |                    |                    |   |   |   |
|--------------------|--------------------|--------------------|---|---|---|
| 0.9397638250415694 | 0.6629811131177368 | 0.8753139917205059 | T | T | T |
| 0.5138204853680789 | 0.7389048802737875 | 0.8377791000248748 | T | T | T |
| 0.1617002762513008 | 0.9175446379067727 | 0.8604757734763283 | T | T | T |
| 0.2292041882002621 | 0.2732528762599658 | 0.8243289416999662 | T | T | T |
| 0.4374580923054479 | 0.3907768270677744 | 0.8811207601940081 | T | T | T |
| 0.4830653110719185 | 0.5252427014892754 | 0.8313088515490206 | T | T | T |
| 0.1785821516297998 | 0.1382669562730504 | 0.8701844157248595 | T | T | T |
| 0.5929019478969615 | 0.0693754479389836 | 0.9072176237342320 | T | T | T |
| 0.0626269402129093 | 0.6080026792783507 | 0.7947938719346302 | T | T | T |
| 0.1291178298578779 | 0.8499772002581842 | 0.9405092696675930 | T | T | T |
| 0.5857315324880256 | 0.8216022104472148 | 0.7811737995919044 | T | T | T |
| 0.8271620636489287 | 0.5718847749053473 | 0.9078355605332119 | T | T | T |
| 0.8364194868469952 | 0.1019707933725943 | 0.7965776816672974 | T | T | T |
| 0.9923354281322115 | 0.4827100868304585 | 0.8306516828547209 | T | T | T |
| 0.6764984258608658 | 0.1839166821951975 | 0.8696198434882555 | T | T | T |
| 0.3386370148712247 | 0.5964615016643841 | 0.9080731203114090 | T | T | T |
| 0.3303944489899273 | 0.0624952015016256 | 0.7942216628306795 | T | T | T |
| 0.0813731309515779 | 0.1437709874800126 | 0.9409286045495205 | T | T | T |
| 0.5929950557096930 | 0.5842224459419917 | 0.7813995187972094 | T | T | T |
| 0.5989990375779020 | 0.8278576562479342 | 0.9085472843465321 | T | T | T |
| 0.0624056882434857 | 0.8374247320865161 | 0.7961987451921622 | T | T | T |
| 0.5256951134817077 | 0.9932114044842715 | 0.8305435255202562 | T | T | T |
| 0.1365378307406609 | 0.6892867758277935 | 0.8736155073344285 | T | T | T |
| 0.0652290852010692 | 0.3422582855054323 | 0.9069602532851506 | T | T | T |
| 0.6052951168314040 | 0.3324839740806297 | 0.7941116357978529 | T | T | T |
| 0.8234163164370667 | 0.0748106898408543 | 0.9246570693357153 | T | T | T |
| 0.8222899527562004 | 0.5920194419760452 | 0.7813600602230037 | T | T | T |
| 0.5758913347437550 | 0.5965307140089167 | 0.9084489711242937 | T | T | T |
| 0.0996764715389905 | 0.0620438606359653 | 0.7964629182991203 | T | T | T |
| 0.0952999467109331 | 0.0089891305276009 | 0.9408202073162502 | T | T | T |
| 0.9667813779783742 | 0.9403311335013601 | 0.9384327376339370 | T | T | T |

**Pt- trimer on Indium Oxide ( In order of increasing energy as shown in the SI)**

Best :

In O Pt

1.0000000000000000

14.6383517878741038 0.0000000000000000 0.0000000000000000

7.3191758939370519 12.6771845178323304 0.0000000000000000

0.0000000000000000 0.0000000000000000 51.0694492725965290

In O Pt

64 96 3

Selective dynamics

Direct

|                    |                    |                    |   |   |   |
|--------------------|--------------------|--------------------|---|---|---|
| 0.7611480013333320 | 0.0111480013333320 | 0.4668317439885570 | F | F | F |
| 0.2388520043333315 | 0.9888520043333315 | 0.4746588917436156 | F | F | F |
| 0.7388519966666678 | 0.4888520196666661 | 0.4746588944350378 | F | F | F |
| 0.2611479936666683 | 0.5111480166666666 | 0.4668317466799934 | F | F | F |
| 0.2277039973333359 | 0.7611480013333320 | 0.4668317439885570 | F | F | F |
| 0.7722959913333298 | 0.2388520043333315 | 0.4746588917436156 | F | F | F |
| 0.7722959836666661 | 0.7388519966666678 | 0.4746588944350378 | F | F | F |
| 0.2277039896666651 | 0.2611479936666683 | 0.4668317466799934 | F | F | F |
| 0.0111480013333320 | 0.2277039973333359 | 0.4668317439885570 | F | F | F |
| 0.9888520043333315 | 0.7722959913333369 | 0.4746588917436156 | F | F | F |
| 0.4888520196666661 | 0.7722959836666661 | 0.4746588944350378 | F | F | F |
| 0.5111480166666666 | 0.2277039896666651 | 0.4668317466799934 | F | F | F |
| 0.0000000000000000 | 0.0000000000000000 | 0.4707453188607431 | F | F | F |
| 0.9999999846666654 | 0.5000000076666637 | 0.4707453242436088 | F | F | F |
| 0.5000000076666637 | 0.5000000076666637 | 0.4707453242436088 | F | F | F |
| 0.5000000076666637 | 0.9999999846666654 | 0.4707453242436088 | F | F | F |
| 0.5714614760499686 | 0.3220635869978707 | 0.5335266216303154 | F | F | F |
| 0.0954565668243177 | 0.3446929456050469 | 0.5253897752549719 | F | F | F |
| 0.5951195294231795 | 0.8450268277640021 | 0.5249275287208306 | F | F | F |
| 0.0713873525637467 | 0.8214752461005688 | 0.5333848297685080 | F | F | F |
| 0.1064749369521607 | 0.5714614760499686 | 0.5335266216303154 | F | F | F |
| 0.5598504875706354 | 0.0954565668243177 | 0.5253897752549719 | F | F | F |
| 0.5598536428128256 | 0.5951195294231795 | 0.5249275287208306 | F | F | F |
| 0.1071374013356774 | 0.0713873525637467 | 0.5333848297685080 | F | F | F |
| 0.3220635869978707 | 0.1064749369521607 | 0.5335266216303154 | F | F | F |
| 0.3446929456050469 | 0.5598504875706354 | 0.5253897752549719 | F | F | F |
| 0.8450268277640021 | 0.5598536428128256 | 0.5249275287208306 | F | F | F |
| 0.8214752461005688 | 0.1071374013356774 | 0.5333848297685080 | F | F | F |
| 0.3333333333333357 | 0.3333333333333357 | 0.5295973615149521 | F | F | F |
| 0.3334481086611234 | 0.8333859062698394 | 0.5291799365853791 | F | F | F |
| 0.8333859062698394 | 0.8331659850690301 | 0.5291799365853791 | F | F | F |
| 0.8331659850690301 | 0.3334481086611234 | 0.5291799365853791 | F | F | F |
| 0.7616698150185117 | 0.0161615786620226 | 0.6440385786489505 | T | T | T |
| 0.9049817687171672 | 0.6550783092536046 | 0.5923878260921605 | T | T | T |
| 0.4270904468248111 | 0.6774714349035180 | 0.5841237870995737 | T | T | T |
| 0.2306674940647174 | 0.9846701341737465 | 0.6476898346588363 | T | T | T |
| 0.7482617368369660 | 0.4715967744032575 | 0.6506255626548321 | T | T | T |
| 0.9308285344680544 | 0.1774272655465022 | 0.5836094047816007 | T | T | T |
| 0.4030510733847733 | 0.1546328918317853 | 0.5918269861636529 | T | T | T |
| 0.2637313209188862 | 0.5164407016456208 | 0.6400991516074177 | T | T | T |
| 0.2218143548259540 | 0.7617830727988698 | 0.6440560141922448 | T | T | T |
| 0.4398749782819495 | 0.9049987559541464 | 0.5923835784900542 | T | T | T |

|                    |                    |                    |   |   |   |
|--------------------|--------------------|--------------------|---|---|---|
| 0.8953982230981293 | 0.4270965147539916 | 0.5841283185471569 | T | T | T |
| 0.7843844117545294 | 0.2307291312464654 | 0.6476737054186106 | T | T | T |
| 0.7798963621573836 | 0.7483289738329443 | 0.6506417730442023 | T | T | T |
| 0.8916304422258170 | 0.9308715798803545 | 0.5836082846522255 | T | T | T |
| 0.4421435650192344 | 0.4031702676590096 | 0.5918328408840725 | T | T | T |
| 0.2195296913853792 | 0.2638375218138828 | 0.6400946821171937 | T | T | T |
| 0.0161013194554074 | 0.2219544635223914 | 0.6440561775578362 | T | T | T |
| 0.6550176314794615 | 0.4398984238827586 | 0.5924004348807306 | T | T | T |
| 0.6774414338979386 | 0.8954106918163951 | 0.5841238857289329 | T | T | T |
| 0.9845602507344853 | 0.7844924226080342 | 0.6477112029805103 | T | T | T |
| 0.4714948323797488 | 0.7799278760519289 | 0.6506063180942376 | T | T | T |
| 0.1773617348188708 | 0.8916063614543902 | 0.5836100830768728 | T | T | T |
| 0.1545092414983928 | 0.4421504386593109 | 0.5918278062977640 | T | T | T |
| 0.5163034618386283 | 0.2196418927563527 | 0.6400769258775364 | T | T | T |
| 0.9998426934259381 | 0.9999543891046370 | 0.6504103511387234 | T | T | T |
| 0.6666626894148920 | 0.6666521147798836 | 0.5887430230622068 | T | T | T |
| 0.0094700439889817 | 0.4964719275737622 | 0.6481575955427401 | T | T | T |
| 0.6681442846917992 | 0.1651413715077574 | 0.5873670451771910 | T | T | T |
| 0.4961840744064939 | 0.4940740826365675 | 0.6481401988890978 | T | T | T |
| 0.1650889141617797 | 0.1665409322972381 | 0.5873890925046524 | T | T | T |
| 0.4938792806107514 | 0.0095120903290560 | 0.6481179330007822 | T | T | T |
| 0.1665714591168318 | 0.6681480187473172 | 0.5873789132139127 | T | T | T |
| 0.8159583373333348 | 0.8601013333333327 | 0.4862116819395084 | F | F | F |
| 0.3946230123333336 | 0.9387660083333316 | 0.4585959608606061 | F | F | F |
| 0.9187303516666674 | 0.1545573616666687 | 0.4501329301675625 | F | F | F |
| 0.1692716669999967 | 0.4334446800000009 | 0.4604640541843779 | F | F | F |
| 0.3239403293333325 | 0.8159583373333348 | 0.4862116819395084 | F | F | F |
| 0.6666109793333348 | 0.3946230123333336 | 0.4585959608606061 | F | F | F |
| 0.9267122866666639 | 0.9187303516666674 | 0.4501329301675625 | F | F | F |
| 0.3972836530000023 | 0.1692716669999967 | 0.4604640541843779 | F | F | F |
| 0.8601013333333327 | 0.3239403293333325 | 0.4862116819395084 | F | F | F |
| 0.9387660083333316 | 0.6666109793333348 | 0.4585959608606061 | F | F | F |
| 0.1545573616666687 | 0.9267122866666639 | 0.4501329301675625 | F | F | F |
| 0.4334446800000009 | 0.3972836530000023 | 0.4604640541843779 | F | F | F |
| 0.1840416783333296 | 0.1398986823333317 | 0.4552789502821071 | F | F | F |
| 0.6053770033333308 | 0.0612340073333328 | 0.4828946713610023 | F | F | F |
| 0.0812696673333306 | 0.8454426573333365 | 0.4913577008838672 | F | F | F |
| 0.8307283486666677 | 0.5665553356666635 | 0.4810265780372305 | F | F | F |
| 0.6760596393333316 | 0.1840416783333367 | 0.4552789502821071 | F | F | F |
| 0.3333889893333364 | 0.6053770033333308 | 0.4828946713610023 | F | F | F |
| 0.0732876753333329 | 0.0812696673333306 | 0.4913577008838672 | F | F | F |
| 0.6027163156666688 | 0.8307283486666677 | 0.4810265780372305 | F | F | F |
| 0.1398986823333317 | 0.6760596393333316 | 0.4552789502821071 | F | F | F |
| 0.0612340073333328 | 0.3333889893333364 | 0.4828946713610023 | F | F | F |



|                    |                    |                    |   |   |   |
|--------------------|--------------------|--------------------|---|---|---|
| 0.8454426573333365 | 0.0732876753333329 | 0.4913577008838672 | F | F | F |
| 0.5665553356666635 | 0.6027163156666688 | 0.4810265780372305 | F | F | F |
| 0.5157927795144346 | 0.4732687373369373 | 0.5137680585633078 | F | F | F |
| 0.9389780411721915 | 0.3945739458359014 | 0.5412288865474011 | F | F | F |
| 0.4138055884135099 | 0.1792879430058036 | 0.5501013560831254 | F | F | F |
| 0.1643402231079705 | 0.8991522013241848 | 0.5396430093322451 | F | F | F |
| 0.0109384831486281 | 0.5157927795144346 | 0.5137680585633078 | F | F | F |
| 0.6664480129919070 | 0.9389780411721915 | 0.5412288865474011 | F | F | F |
| 0.4069064685806794 | 0.4138055884135099 | 0.5501013560831254 | F | F | F |
| 0.9365075755678447 | 0.1643402231079705 | 0.5396430093322451 | F | F | F |
| 0.4732687373369373 | 0.0109384831486281 | 0.5137680585633078 | F | F | F |
| 0.3945739458359014 | 0.6664480129919070 | 0.5412288865474011 | F | F | F |
| 0.1792879430058036 | 0.4069064685806794 | 0.5501013560831254 | F | F | F |
| 0.8991522013241848 | 0.9365075755678447 | 0.5396430093322451 | F | F | F |
| 0.1502078384511734 | 0.1932397001298156 | 0.5448734685138632 | F | F | F |
| 0.7272745789267816 | 0.2725057257219632 | 0.5171331615441943 | F | F | F |
| 0.2523256400471894 | 0.4873897408432910 | 0.5086482917388153 | F | F | F |
| 0.5022127006463535 | 0.7673910184547594 | 0.5188430143373637 | F | F | F |
| 0.6565524614190181 | 0.1502078384511734 | 0.5448734685138632 | F | F | F |
| 0.0002196953512481 | 0.7272745789267816 | 0.5171331615441943 | F | F | F |
| 0.2602846191095196 | 0.2523256400471894 | 0.5086482917388153 | F | F | F |
| 0.7303962808988871 | 0.5022127006463535 | 0.5188430143373637 | F | F | F |
| 0.1932397001298156 | 0.6565524614190181 | 0.5448734685138632 | F | F | F |
| 0.2725057257219632 | 0.0002196953512481 | 0.5171331615441943 | F | F | F |
| 0.4873897408432910 | 0.2602846191095196 | 0.5086482917388153 | F | F | F |
| 0.7673910184547594 | 0.7303962808988871 | 0.5188430143373637 | F | F | F |
| 0.8226269474467631 | 0.8605874186947365 | 0.6612646520848494 | T | T | T |
| 0.8489321661318472 | 0.8053506771500867 | 0.5724766609985861 | T | T | T |
| 0.2727590099582747 | 0.7258803601626678 | 0.5997979868791466 | T | T | T |
| 0.3949676289537705 | 0.9412520005324660 | 0.6347506580351692 | T | T | T |
| 0.7500389579982664 | 0.5125286413877139 | 0.6098430509751068 | T | T | T |
| 0.9281577975910814 | 0.1486381414657447 | 0.6247040953409085 | T | T | T |
| 0.4943844485162540 | 0.2328071538101983 | 0.5975115587076755 | T | T | T |
| 0.1768650234945511 | 0.4356287093483486 | 0.6391544837560807 | T | T | T |
| 0.3164359473620068 | 0.8228553874323954 | 0.6612401791103303 | T | T | T |
| 0.3455994803154631 | 0.8489782457225191 | 0.5724921716976010 | T | T | T |
| 0.0011441127971982 | 0.2728156923973342 | 0.5998599053777638 | T | T | T |
| 0.6635372528360362 | 0.3950441973912645 | 0.6347837348417512 | T | T | T |
| 0.7374168131365457 | 0.7500376004928623 | 0.6098408828408046 | T | T | T |
| 0.9229386905636251 | 0.9281621371658030 | 0.6247259075079298 | T | T | T |
| 0.2726297716118668 | 0.4944344537682963 | 0.5975351397445420 | T | T | T |
| 0.3872847787607367 | 0.1769238271231148 | 0.6391049328877961 | T | T | T |
| 0.8604299495492502 | 0.3164862349465944 | 0.6612548043568102 | T | T | T |
| 0.8053427245412954 | 0.3456799150769000 | 0.5724785574131247 | T | T | T |

|                    |                    |                    |   |   |   |
|--------------------|--------------------|--------------------|---|---|---|
| 0.7259179280837009 | 0.0012177696636123 | 0.5998137272033034 | T | T | T |
| 0.9412092693904539 | 0.6637094293634817 | 0.6347607686642716 | T | T | T |
| 0.5125155512250927 | 0.7374323057007248 | 0.6098346316695502 | T | T | T |
| 0.1486377000308877 | 0.9229785591690521 | 0.6247171913960914 | T | T | T |
| 0.2324595593678944 | 0.2726375782091928 | 0.5975339543592277 | T | T | T |
| 0.4355417467877515 | 0.3873741315324689 | 0.6391578495572415 | T | T | T |
| 0.4834839960085419 | 0.5246624347279202 | 0.6048534919155539 | T | T | T |
| 0.1887472009745967 | 0.1356047545065764 | 0.6295229490884220 | T | T | T |
| 0.5999109079302966 | 0.0676525737684802 | 0.6565333899208482 | T | T | T |
| 0.0613041511742377 | 0.6047387672643179 | 0.5759417349300023 | T | T | T |
| 0.0764010301334327 | 0.8399741619931327 | 0.6670988735684772 | T | T | T |
| 0.5862673463763242 | 0.8216747636490437 | 0.5676079338047378 | T | T | T |
| 0.9310007633756532 | 0.5562184635508113 | 0.6846988348389421 | T | T | T |
| 0.8350198507952319 | 0.1026387158653562 | 0.5770909002879425 | T | T | T |
| 0.9916283223671145 | 0.4836402044402855 | 0.6048778100650779 | T | T | T |
| 0.6752482654961421 | 0.1887988456080746 | 0.6294780441883745 | T | T | T |
| 0.3320049463143707 | 0.6000613657809961 | 0.6565770583787713 | T | T | T |
| 0.3337978729489787 | 0.0613078345448481 | 0.5759603800679424 | T | T | T |
| 0.0832263468649664 | 0.0765228739404529 | 0.6670647933073635 | T | T | T |
| 0.5920483464202111 | 0.5862537100060473 | 0.5676187189899762 | T | T | T |
| 0.5126761669831063 | 0.9311849905760052 | 0.6846946143577415 | T | T | T |
| 0.0621694678559182 | 0.8349592607532282 | 0.5770801311672298 | T | T | T |
| 0.5245755394789512 | 0.9917827346906746 | 0.6048195473939052 | T | T | T |
| 0.1355620243224400 | 0.6754109114345038 | 0.6295008385803543 | T | T | T |
| 0.0676392533642197 | 0.3322816693306242 | 0.6565840895896669 | T | T | T |
| 0.6047824482111910 | 0.3338466084920703 | 0.5759585529968303 | T | T | T |
| 0.8398435201935375 | 0.0834238912003519 | 0.6670997540634823 | T | T | T |
| 0.8216732613900982 | 0.5920256173911704 | 0.5676060334662365 | T | T | T |
| 0.5544280227782256 | 0.5134611554534317 | 0.6848145534600105 | T | T | T |
| 0.1025841696495352 | 0.0622264175106839 | 0.5771123152382167 | T | T | T |
| 0.7847510918552222 | 0.5964101610035805 | 0.6812543145768103 | T | T | T |
| 0.5961183379723030 | 0.6183287245893597 | 0.6812199385108136 | T | T | T |
| 0.6183068263600702 | 0.7848700176589367 | 0.6812110702915046 | T | T | T |

Best + 1

In O Pt

1.0000000000000000

14.6383517878741038 0.0000000000000000 0.0000000000000000

7.3191758939370519 12.6771845178323304 0.0000000000000000

0.0000000000000000 0.0000000000000000 51.0694492725965290

In O Pt

64 96 3

Selective dynamics

Direct

|                    |                    |                    |   |   |   |
|--------------------|--------------------|--------------------|---|---|---|
| 0.7611480013333320 | 0.0111480013333320 | 0.4668317439885570 | F | F | F |
| 0.2388520043333315 | 0.9888520043333315 | 0.4746588917436156 | F | F | F |
| 0.7388519966666678 | 0.4888520196666661 | 0.4746588944350378 | F | F | F |
| 0.2611479936666683 | 0.5111480166666666 | 0.4668317466799934 | F | F | F |
| 0.2277039973333359 | 0.7611480013333320 | 0.4668317439885570 | F | F | F |
| 0.7722959913333298 | 0.2388520043333315 | 0.4746588917436156 | F | F | F |
| 0.7722959836666661 | 0.7388519966666678 | 0.4746588944350378 | F | F | F |
| 0.2277039896666651 | 0.2611479936666683 | 0.4668317466799934 | F | F | F |
| 0.0111480013333320 | 0.2277039973333359 | 0.4668317439885570 | F | F | F |
| 0.9888520043333315 | 0.7722959913333369 | 0.4746588917436156 | F | F | F |
| 0.4888520196666661 | 0.7722959836666661 | 0.4746588944350378 | F | F | F |
| 0.5111480166666666 | 0.2277039896666651 | 0.4668317466799934 | F | F | F |
| 0.0000000000000000 | 0.0000000000000000 | 0.4707453188607431 | F | F | F |
| 0.9999999846666654 | 0.5000000076666637 | 0.4707453242436088 | F | F | F |
| 0.5000000076666637 | 0.5000000076666637 | 0.4707453242436088 | F | F | F |
| 0.5000000076666637 | 0.9999999846666654 | 0.4707453242436088 | F | F | F |
| 0.5714614760499686 | 0.3220635869978707 | 0.5335266216303154 | F | F | F |
| 0.0954565668243177 | 0.3446929456050469 | 0.5253897752549719 | F | F | F |
| 0.5951195294231795 | 0.8450268277640021 | 0.5249275287208306 | F | F | F |
| 0.0713873525637467 | 0.8214752461005688 | 0.5333848297685080 | F | F | F |
| 0.1064749369521607 | 0.5714614760499686 | 0.5335266216303154 | F | F | F |
| 0.5598504875706354 | 0.0954565668243177 | 0.5253897752549719 | F | F | F |
| 0.5598536428128256 | 0.5951195294231795 | 0.5249275287208306 | F | F | F |
| 0.1071374013356774 | 0.0713873525637467 | 0.5333848297685080 | F | F | F |
| 0.3220635869978707 | 0.1064749369521607 | 0.5335266216303154 | F | F | F |
| 0.3446929456050469 | 0.5598504875706354 | 0.5253897752549719 | F | F | F |
| 0.8450268277640021 | 0.5598536428128256 | 0.5249275287208306 | F | F | F |
| 0.8214752461005688 | 0.1071374013356774 | 0.5333848297685080 | F | F | F |
| 0.3333333333333357 | 0.3333333333333357 | 0.5295973615149521 | F | F | F |
| 0.3334481086611234 | 0.8333859062698394 | 0.5291799365853791 | F | F | F |
| 0.8333859062698394 | 0.8331659850690301 | 0.5291799365853791 | F | F | F |
| 0.8331659850690301 | 0.3334481086611234 | 0.5291799365853791 | F | F | F |
| 0.7597069730990487 | 0.0129207074055147 | 0.6455904169299923 | T | T | T |
| 0.9037026350936048 | 0.6555571043914565 | 0.5917378582742319 | T | T | T |
| 0.4295682817464156 | 0.6782026300386580 | 0.5835573768676117 | T | T | T |
| 0.2272324917016643 | 0.9962803657806265 | 0.6494465648735985 | T | T | T |
| 0.7491433121011728 | 0.4867624697555160 | 0.6499975163719984 | T | T | T |
| 0.9289108350135937 | 0.1781517429117668 | 0.5836499384023204 | T | T | T |
| 0.4016697031656988 | 0.1547870456240355 | 0.5919308492336601 | T | T | T |
| 0.2580106718259229 | 0.5131572463977884 | 0.6421558170554610 | T | T | T |
| 0.2175597757819323 | 0.7650362928793545 | 0.6385218716172203 | T | T | T |
| 0.4389168446945740 | 0.9042138386685452 | 0.5929481892418028 | T | T | T |
| 0.8925958174113187 | 0.4277005743703408 | 0.5831472142114766 | T | T | T |

|                    |                    |                    |   |   |   |
|--------------------|--------------------|--------------------|---|---|---|
| 0.7773567927712700 | 0.2369681006331361 | 0.6477687891064438 | T | T | T |
| 0.7690006844664257 | 0.7403480515858238 | 0.6501549470577347 | T | T | T |
| 0.8942462951601328 | 0.9293464615560068 | 0.5850965772692596 | T | T | T |
| 0.4408504191099255 | 0.4040222274316424 | 0.5924386402431681 | T | T | T |
| 0.2177424095695003 | 0.2671379326822834 | 0.6404724130625307 | T | T | T |
| 0.0074045498186684 | 0.2323939785103357 | 0.6437879559069560 | T | T | T |
| 0.6546711810992446 | 0.4396633718934020 | 0.5922180887518266 | T | T | T |
| 0.6788493659436384 | 0.8943105353700963 | 0.5838408011487582 | T | T | T |
| 0.9805409171204179 | 0.7727038182230599 | 0.6510619526093712 | T | T | T |
| 0.5055296390346415 | 0.7627338515445783 | 0.6522803146812628 | T | T | T |
| 0.1764636119398175 | 0.8947687149450675 | 0.5830466350122148 | T | T | T |
| 0.1539944698330910 | 0.4420094180856485 | 0.5917894155354190 | T | T | T |
| 0.5102289009250607 | 0.2230977910691453 | 0.6409772756804950 | T | T | T |
| 0.9922826444369089 | 0.0113583376587740 | 0.6517169252537915 | T | T | T |
| 0.6659418770289175 | 0.6673962463347960 | 0.5875384753017275 | T | T | T |
| 0.9912736757859538 | 0.4966827934498298 | 0.6450888997554721 | T | T | T |
| 0.6672838913855498 | 0.1642569775950875 | 0.5879932593755526 | T | T | T |
| 0.5048933320427316 | 0.5084843230487892 | 0.6470868436035573 | T | T | T |
| 0.1635083439438296 | 0.1689845820387763 | 0.5874319456834267 | T | T | T |
| 0.5080021684120281 | 0.9944591912794485 | 0.6463906303989586 | T | T | T |
| 0.1660601106735996 | 0.6657387316928026 | 0.5866900132505887 | T | T | T |
| 0.8159583373333348 | 0.8601013333333327 | 0.4862116819395084 | F | F | F |
| 0.3946230123333336 | 0.9387660083333316 | 0.4585959608606061 | F | F | F |
| 0.9187303516666674 | 0.1545573616666687 | 0.4501329301675625 | F | F | F |
| 0.1692716669999967 | 0.4334446800000009 | 0.4604640541843779 | F | F | F |
| 0.3239403293333325 | 0.8159583373333348 | 0.4862116819395084 | F | F | F |
| 0.6666109793333348 | 0.3946230123333336 | 0.4585959608606061 | F | F | F |
| 0.9267122866666639 | 0.9187303516666674 | 0.4501329301675625 | F | F | F |
| 0.3972836530000023 | 0.1692716669999967 | 0.4604640541843779 | F | F | F |
| 0.8601013333333327 | 0.3239403293333325 | 0.4862116819395084 | F | F | F |
| 0.9387660083333316 | 0.6666109793333348 | 0.4585959608606061 | F | F | F |
| 0.1545573616666687 | 0.9267122866666639 | 0.4501329301675625 | F | F | F |
| 0.4334446800000009 | 0.3972836530000023 | 0.4604640541843779 | F | F | F |
| 0.1840416783333296 | 0.1398986823333317 | 0.4552789502821071 | F | F | F |
| 0.6053770033333308 | 0.0612340073333328 | 0.4828946713610023 | F | F | F |
| 0.0812696673333306 | 0.8454426573333365 | 0.4913577008838672 | F | F | F |
| 0.8307283486666677 | 0.5665553356666635 | 0.4810265780372305 | F | F | F |
| 0.6760596393333316 | 0.1840416783333367 | 0.4552789502821071 | F | F | F |
| 0.3333889893333364 | 0.6053770033333308 | 0.4828946713610023 | F | F | F |
| 0.0732876753333329 | 0.0812696673333306 | 0.4913577008838672 | F | F | F |
| 0.6027163156666688 | 0.8307283486666677 | 0.4810265780372305 | F | F | F |
| 0.1398986823333317 | 0.6760596393333316 | 0.4552789502821071 | F | F | F |
| 0.0612340073333328 | 0.3333889893333364 | 0.4828946713610023 | F | F | F |
| 0.8454426573333365 | 0.0732876753333329 | 0.4913577008838672 | F | F | F |

|                    |                    |                    |   |   |   |
|--------------------|--------------------|--------------------|---|---|---|
| 0.5665553356666635 | 0.6027163156666688 | 0.4810265780372305 | F | F | F |
| 0.5157927795144346 | 0.4732687373369373 | 0.5137680585633078 | F | F | F |
| 0.9389780411721915 | 0.3945739458359014 | 0.5412288865474011 | F | F | F |
| 0.4138055884135099 | 0.1792879430058036 | 0.5501013560831254 | F | F | F |
| 0.1643402231079705 | 0.8991522013241848 | 0.5396430093322451 | F | F | F |
| 0.0109384831486281 | 0.5157927795144346 | 0.5137680585633078 | F | F | F |
| 0.6664480129919070 | 0.9389780411721915 | 0.5412288865474011 | F | F | F |
| 0.4069064685806794 | 0.4138055884135099 | 0.5501013560831254 | F | F | F |
| 0.9365075755678447 | 0.1643402231079705 | 0.5396430093322451 | F | F | F |
| 0.4732687373369373 | 0.0109384831486281 | 0.5137680585633078 | F | F | F |
| 0.3945739458359014 | 0.6664480129919070 | 0.5412288865474011 | F | F | F |
| 0.1792879430058036 | 0.4069064685806794 | 0.5501013560831254 | F | F | F |
| 0.8991522013241848 | 0.9365075755678447 | 0.5396430093322451 | F | F | F |
| 0.1502078384511734 | 0.1932397001298156 | 0.5448734685138632 | F | F | F |
| 0.7272745789267816 | 0.2725057257219632 | 0.5171331615441943 | F | F | F |
| 0.2523256400471894 | 0.4873897408432910 | 0.5086482917388153 | F | F | F |
| 0.5022127006463535 | 0.7673910184547594 | 0.5188430143373637 | F | F | F |
| 0.6565524614190181 | 0.1502078384511734 | 0.5448734685138632 | F | F | F |
| 0.0002196953512481 | 0.7272745789267816 | 0.5171331615441943 | F | F | F |
| 0.2602846191095196 | 0.2523256400471894 | 0.5086482917388153 | F | F | F |
| 0.7303962808988871 | 0.5022127006463535 | 0.5188430143373637 | F | F | F |
| 0.1932397001298156 | 0.6565524614190181 | 0.5448734685138632 | F | F | F |
| 0.2725057257219632 | 0.0002196953512481 | 0.5171331615441943 | F | F | F |
| 0.4873897408432910 | 0.2602846191095196 | 0.5086482917388153 | F | F | F |
| 0.7673910184547594 | 0.7303962808988871 | 0.5188430143373637 | F | F | F |
| 0.8134729654651759 | 0.8537579719759931 | 0.6610262507479385 | T | T | T |
| 0.8505813809345923 | 0.8069733513835811 | 0.5726636835900817 | T | T | T |
| 0.2727608033131950 | 0.7269934581680871 | 0.5984288354702386 | T | T | T |
| 0.3941500216016098 | 0.9336705284844670 | 0.6381462548831730 | T | T | T |
| 0.7488940824425364 | 0.5122022894723961 | 0.6078816576121185 | T | T | T |
| 0.9228981997432369 | 0.1531760912979318 | 0.6251575614490114 | T | T | T |
| 0.4930531233934141 | 0.2323887143301005 | 0.5982452093405676 | T | T | T |
| 0.1656942177015840 | 0.4382713583134958 | 0.6380274117374232 | T | T | T |
| 0.3945798112929046 | 0.7623571646558227 | 0.6806407320103166 | T | T | T |
| 0.3438996487540791 | 0.8501258450925336 | 0.5726406087469219 | T | T | T |
| 0.9990406689515001 | 0.2739320948583857 | 0.5999391978741485 | T | T | T |
| 0.6626653717837494 | 0.3950752222583541 | 0.6346292644190560 | T | T | T |
| 0.7385630606086711 | 0.7478746198724550 | 0.6082710546493071 | T | T | T |
| 0.9322678958771812 | 0.9194080321741550 | 0.6286735440842488 | T | T | T |
| 0.2714544541091215 | 0.4950039523826877 | 0.5986596966447904 | T | T | T |
| 0.3873492381022806 | 0.1717075727181296 | 0.6397014659857798 | T | T | T |
| 0.8515548271288953 | 0.3275974975159122 | 0.6610599760027186 | T | T | T |
| 0.8045921512882985 | 0.3437022984427570 | 0.5721996963471068 | T | T | T |
| 0.7297114596833847 | 0.9982487626595711 | 0.6012456940252449 | T | T | T |

|                    |                    |                    |   |   |   |
|--------------------|--------------------|--------------------|---|---|---|
| 0.9404808172647460 | 0.6605478937866487 | 0.6345772898932223 | T | T | T |
| 0.5120083333336233 | 0.7406887250564361 | 0.6093906638985496 | T | T | T |
| 0.1496745055927087 | 0.9258637211672545 | 0.6255558624922442 | T | T | T |
| 0.2322091002288967 | 0.2725845976842541 | 0.5978063251202984 | T | T | T |
| 0.4309661441237594 | 0.3957150575774501 | 0.6395995736124059 | T | T | T |
| 0.4814894993415534 | 0.5273123380711315 | 0.6039046774723069 | T | T | T |
| 0.1844369707701519 | 0.1413294917112239 | 0.6298114188919398 | T | T | T |
| 0.5954493611125681 | 0.0684220440536325 | 0.6581564216999765 | T | T | T |
| 0.0607099656476974 | 0.6045067274908057 | 0.5757040142322888 | T | T | T |
| 0.0781346648978013 | 0.8983549189796333 | 0.6852793581960192 | T | T | T |
| 0.5843698689144408 | 0.8234998029399412 | 0.5673114296306232 | T | T | T |
| 0.8297958353903923 | 0.5738714473310720 | 0.6594271603105385 | T | T | T |
| 0.8356183028283785 | 0.1003455722795281 | 0.5778744106609205 | T | T | T |
| 0.9902881526813571 | 0.4822781464681883 | 0.6024765820131723 | T | T | T |
| 0.6711389184521930 | 0.1869942563597461 | 0.6305737568166222 | T | T | T |
| 0.2499165445860637 | 0.5831514647404268 | 0.6798508156091020 | T | T | T |
| 0.3321367422556450 | 0.0610316096743818 | 0.5765350511895695 | T | T | T |
| 0.0741567958432376 | 0.0897744226124200 | 0.6672883069125319 | T | T | T |
| 0.5921678071441803 | 0.5861545422533155 | 0.5671494230624088 | T | T | T |
| 0.6021665242947305 | 0.8319765643257012 | 0.6597028290569537 | T | T | T |
| 0.0627992237811041 | 0.8362003392639613 | 0.5778035754007103 | T | T | T |
| 0.5240835748656777 | 0.9907181781838895 | 0.6039441233849905 | T | T | T |
| 0.1378161675186935 | 0.6766055632676397 | 0.6284676499837304 | T | T | T |
| 0.0637187522576818 | 0.3365356646341484 | 0.6577470781251953 | T | T | T |
| 0.6039492433565492 | 0.3328426229050304 | 0.5763828117270697 | T | T | T |
| 0.8331477284197252 | 0.0885898321633413 | 0.6675756907066960 | T | T | T |
| 0.8203805333162911 | 0.5935350872926678 | 0.5667973174915312 | T | T | T |
| 0.5898481023616957 | 0.5956338455281288 | 0.6582837255085348 | T | T | T |
| 0.1010229147333182 | 0.0637677614497040 | 0.5774788836945226 | T | T | T |
| 0.3494271612257294 | 0.6486053410819488 | 0.6756060718544477 | T | T | T |
| 0.1324182413646125 | 0.7415184672610452 | 0.6841305386638634 | T | T | T |
| 0.2347107644360686 | 0.8589907395338074 | 0.6850018597728657 | T | T | T |

Best + 2

In O Pt

1.0000000000000000

14.6383517878741038 0.0000000000000000 0.0000000000000000

7.3191758939370519 12.6771845178323304 0.0000000000000000

0.0000000000000000 0.0000000000000000 51.0694492725965290

In O Pt

64 96 3

Selective dynamics

Direct

|                    |                    |                    |   |   |   |
|--------------------|--------------------|--------------------|---|---|---|
| 0.7611480013333320 | 0.0111480013333320 | 0.4668317439885570 | F | F | F |
| 0.2388520043333315 | 0.9888520043333315 | 0.4746588917436156 | F | F | F |
| 0.7388519966666678 | 0.4888520196666661 | 0.4746588944350378 | F | F | F |
| 0.2611479936666683 | 0.5111480166666666 | 0.4668317466799934 | F | F | F |
| 0.2277039973333359 | 0.7611480013333320 | 0.4668317439885570 | F | F | F |
| 0.7722959913333298 | 0.2388520043333315 | 0.4746588917436156 | F | F | F |
| 0.7722959836666661 | 0.7388519966666678 | 0.4746588944350378 | F | F | F |
| 0.2277039896666651 | 0.2611479936666683 | 0.4668317466799934 | F | F | F |
| 0.0111480013333320 | 0.2277039973333359 | 0.4668317439885570 | F | F | F |
| 0.9888520043333315 | 0.7722959913333369 | 0.4746588917436156 | F | F | F |
| 0.4888520196666661 | 0.7722959836666661 | 0.4746588944350378 | F | F | F |
| 0.5111480166666666 | 0.2277039896666651 | 0.4668317466799934 | F | F | F |
| 0.0000000000000000 | 0.0000000000000000 | 0.4707453188607431 | F | F | F |
| 0.9999999846666654 | 0.5000000076666637 | 0.4707453242436088 | F | F | F |
| 0.5000000076666637 | 0.5000000076666637 | 0.4707453242436088 | F | F | F |
| 0.5000000076666637 | 0.9999999846666654 | 0.4707453242436088 | F | F | F |
| 0.5714614760499686 | 0.3220635869978707 | 0.5335266216303154 | F | F | F |
| 0.0954565668243177 | 0.3446929456050469 | 0.5253897752549719 | F | F | F |
| 0.5951195294231795 | 0.8450268277640021 | 0.5249275287208306 | F | F | F |
| 0.0713873525637467 | 0.8214752461005688 | 0.5333848297685080 | F | F | F |
| 0.1064749369521607 | 0.5714614760499686 | 0.5335266216303154 | F | F | F |
| 0.5598504875706354 | 0.0954565668243177 | 0.5253897752549719 | F | F | F |
| 0.5598536428128256 | 0.5951195294231795 | 0.5249275287208306 | F | F | F |
| 0.1071374013356774 | 0.0713873525637467 | 0.5333848297685080 | F | F | F |
| 0.3220635869978707 | 0.1064749369521607 | 0.5335266216303154 | F | F | F |
| 0.3446929456050469 | 0.5598504875706354 | 0.5253897752549719 | F | F | F |
| 0.8450268277640021 | 0.5598536428128256 | 0.5249275287208306 | F | F | F |
| 0.8214752461005688 | 0.1071374013356774 | 0.5333848297685080 | F | F | F |
| 0.3333333333333357 | 0.3333333333333357 | 0.5295973615149521 | F | F | F |
| 0.3334481086611234 | 0.8333859062698394 | 0.5291799365853791 | F | F | F |
| 0.8333859062698394 | 0.8331659850690301 | 0.5291799365853791 | F | F | F |
| 0.8331659850690301 | 0.3334481086611234 | 0.5291799365853791 | F | F | F |
| 0.7539888005269807 | 0.0058191221243145 | 0.6450881072053918 | T | T | T |
| 0.9054233317060220 | 0.6553754950892929 | 0.5917696051770546 | T | T | T |
| 0.4257097207880631 | 0.6798638942330719 | 0.5834561620710302 | T | T | T |
| 0.2497694106344793 | 0.9762327437177512 | 0.6488709039653283 | T | T | T |
| 0.7304983427871311 | 0.5077391082402565 | 0.6493574944983366 | T | T | T |
| 0.9294677407077400 | 0.1777572623786022 | 0.5836532891330394 | T | T | T |
| 0.4024179146064190 | 0.1551478773868875 | 0.5918623343930324 | T | T | T |
| 0.2651880551949721 | 0.5134956101821562 | 0.6406483830905855 | T | T | T |
| 0.2266755599512595 | 0.7597843382824840 | 0.6445885165365199 | T | T | T |
| 0.4405455515869298 | 0.9043651673725747 | 0.5914872498960515 | T | T | T |
| 0.8940524816843923 | 0.4277591966538263 | 0.5830783708515720 | T | T | T |
| 0.7713071637968770 | 0.2463644190007160 | 0.6471989640548129 | T | T | T |

|                    |                    |                    |   |   |   |
|--------------------|--------------------|--------------------|---|---|---|
| 0.7686786430907762 | 0.7392621949645376 | 0.6497057482300540 | T | T | T |
| 0.8913343229226617 | 0.9311373786104589 | 0.5839395322981182 | T | T | T |
| 0.4424785309458938 | 0.4019223482471799 | 0.5918491478878645 | T | T | T |
| 0.2202530189685193 | 0.2646453590410979 | 0.6408511886997703 | T | T | T |
| 0.0118497644619419 | 0.2323996801140676 | 0.6429174525314905 | T | T | T |
| 0.6541308432302454 | 0.4411803049188596 | 0.5914779181199230 | T | T | T |
| 0.6790360487591265 | 0.8936447326128363 | 0.5832111469015973 | T | T | T |
| 0.9829443344214730 | 0.7808004219433330 | 0.6478316161036434 | T | T | T |
| 0.4931958387277731 | 0.7675204887989296 | 0.6495773104966366 | T | T | T |
| 0.1767559742414345 | 0.8935178890670877 | 0.5841085797126800 | T | T | T |
| 0.1557147621357035 | 0.4417046620121607 | 0.5917954645926814 | T | T | T |
| 0.5129750666708609 | 0.2202654149499843 | 0.6410490029446857 | T | T | T |
| 0.0021778699732549 | 0.9951932119507746 | 0.6489367219889189 | T | T | T |
| 0.6665749232653254 | 0.6672314329954858 | 0.5864483357789027 | T | T | T |
| 0.9928710865681671 | 0.4979245722921155 | 0.6450259437243628 | T | T | T |
| 0.6682108626971874 | 0.1632091611760363 | 0.5879123334497665 | T | T | T |
| 0.4928117283027250 | 0.5135600321783492 | 0.6454609392285843 | T | T | T |
| 0.1649233399886293 | 0.1660919349664410 | 0.5877417181034820 | T | T | T |
| 0.5113435935061669 | 0.9913017474564854 | 0.6451558952060387 | T | T | T |
| 0.1674156443146157 | 0.6682305611954401 | 0.5876666832504925 | T | T | T |
| 0.8159583373333348 | 0.8601013333333327 | 0.4862116819395084 | F | F | F |
| 0.3946230123333336 | 0.9387660083333316 | 0.4585959608606061 | F | F | F |
| 0.9187303516666674 | 0.1545573616666687 | 0.4501329301675625 | F | F | F |
| 0.1692716669999967 | 0.4334446800000009 | 0.4604640541843779 | F | F | F |
| 0.3239403293333325 | 0.8159583373333348 | 0.4862116819395084 | F | F | F |
| 0.6666109793333348 | 0.3946230123333336 | 0.4585959608606061 | F | F | F |
| 0.9267122866666639 | 0.9187303516666674 | 0.4501329301675625 | F | F | F |
| 0.3972836530000023 | 0.1692716669999967 | 0.4604640541843779 | F | F | F |
| 0.8601013333333327 | 0.3239403293333325 | 0.4862116819395084 | F | F | F |
| 0.9387660083333316 | 0.6666109793333348 | 0.4585959608606061 | F | F | F |
| 0.1545573616666687 | 0.9267122866666639 | 0.4501329301675625 | F | F | F |
| 0.4334446800000009 | 0.3972836530000023 | 0.4604640541843779 | F | F | F |
| 0.1840416783333296 | 0.1398986823333317 | 0.4552789502821071 | F | F | F |
| 0.6053770033333308 | 0.0612340073333328 | 0.4828946713610023 | F | F | F |
| 0.0812696673333306 | 0.8454426573333365 | 0.4913577008838672 | F | F | F |
| 0.8307283486666677 | 0.5665553356666635 | 0.4810265780372305 | F | F | F |
| 0.6760596393333316 | 0.1840416783333367 | 0.4552789502821071 | F | F | F |
| 0.3333889893333364 | 0.6053770033333308 | 0.4828946713610023 | F | F | F |
| 0.0732876753333329 | 0.0812696673333306 | 0.4913577008838672 | F | F | F |
| 0.6027163156666688 | 0.8307283486666677 | 0.4810265780372305 | F | F | F |
| 0.1398986823333317 | 0.6760596393333316 | 0.4552789502821071 | F | F | F |
| 0.0612340073333328 | 0.3333889893333364 | 0.4828946713610023 | F | F | F |
| 0.8454426573333365 | 0.0732876753333329 | 0.4913577008838672 | F | F | F |
| 0.5665553356666635 | 0.6027163156666688 | 0.4810265780372305 | F | F | F |



|                    |                    |                    |   |   |   |
|--------------------|--------------------|--------------------|---|---|---|
| 0.5157927795144346 | 0.4732687373369373 | 0.5137680585633078 | F | F | F |
| 0.9389780411721915 | 0.3945739458359014 | 0.5412288865474011 | F | F | F |
| 0.4138055884135099 | 0.1792879430058036 | 0.5501013560831254 | F | F | F |
| 0.1643402231079705 | 0.8991522013241848 | 0.5396430093322451 | F | F | F |
| 0.0109384831486281 | 0.5157927795144346 | 0.5137680585633078 | F | F | F |
| 0.6664480129919070 | 0.9389780411721915 | 0.5412288865474011 | F | F | F |
| 0.4069064685806794 | 0.4138055884135099 | 0.5501013560831254 | F | F | F |
| 0.9365075755678447 | 0.1643402231079705 | 0.5396430093322451 | F | F | F |
| 0.4732687373369373 | 0.0109384831486281 | 0.5137680585633078 | F | F | F |
| 0.3945739458359014 | 0.6664480129919070 | 0.5412288865474011 | F | F | F |
| 0.1792879430058036 | 0.4069064685806794 | 0.5501013560831254 | F | F | F |
| 0.8991522013241848 | 0.9365075755678447 | 0.5396430093322451 | F | F | F |
| 0.1502078384511734 | 0.1932397001298156 | 0.5448734685138632 | F | F | F |
| 0.7272745789267816 | 0.2725057257219632 | 0.5171331615441943 | F | F | F |
| 0.2523256400471894 | 0.4873897408432910 | 0.5086482917388153 | F | F | F |
| 0.5022127006463535 | 0.7673910184547594 | 0.5188430143373637 | F | F | F |
| 0.6565524614190181 | 0.1502078384511734 | 0.5448734685138632 | F | F | F |
| 0.0002196953512481 | 0.7272745789267816 | 0.5171331615441943 | F | F | F |
| 0.2602846191095196 | 0.2523256400471894 | 0.5086482917388153 | F | F | F |
| 0.7303962808988871 | 0.5022127006463535 | 0.5188430143373637 | F | F | F |
| 0.1932397001298156 | 0.6565524614190181 | 0.5448734685138632 | F | F | F |
| 0.2725057257219632 | 0.0002196953512481 | 0.5171331615441943 | F | F | F |
| 0.4873897408432910 | 0.2602846191095196 | 0.5086482917388153 | F | F | F |
| 0.7673910184547594 | 0.7303962808988871 | 0.5188430143373637 | F | F | F |
| 0.8192149603301286 | 0.8464916989943725 | 0.6599926996493876 | T | T | T |
| 0.8508803512919032 | 0.8068647880885340 | 0.5725763216329072 | T | T | T |
| 0.2711013860077065 | 0.7295044611829615 | 0.6006939928289672 | T | T | T |
| 0.4016454577483338 | 0.9399135328515934 | 0.6344046423192039 | T | T | T |
| 0.7476091726786197 | 0.5139689568267602 | 0.6077666849083685 | T | T | T |
| 0.9233059524898973 | 0.1556086559857090 | 0.6269050784396875 | T | T | T |
| 0.4962622846831919 | 0.2312537726461598 | 0.5984570125672102 | T | T | T |
| 0.1721587606342536 | 0.4374655568284261 | 0.6392405054886738 | T | T | T |
| 0.3355418484531176 | 0.8090255756683241 | 0.6583183514307773 | T | T | T |
| 0.3422335467538192 | 0.8510956171665618 | 0.5725520962171973 | T | T | T |
| 0.9995358190366037 | 0.2733588971554820 | 0.6002689223520068 | T | T | T |
| 0.6603504954630834 | 0.4028663489321508 | 0.6351361004892471 | T | T | T |
| 0.7393308435457856 | 0.7474794415797014 | 0.6078034375132335 | T | T | T |
| 0.9159331795306846 | 0.9344529454080682 | 0.6267846149310348 | T | T | T |
| 0.2734898845134248 | 0.4943225336465284 | 0.5980729420844942 | T | T | T |
| 0.3887121795748105 | 0.1715324086042050 | 0.6389614794623560 | T | T | T |
| 0.8485711310540763 | 0.3484746141820417 | 0.6611905423095569 | T | T | T |
| 0.8063183019697512 | 0.3434286435839625 | 0.5726783787725530 | T | T | T |
| 0.7261015001296774 | 0.9993609301162838 | 0.6005251969009776 | T | T | T |
| 0.9432869576978077 | 0.6600802151168129 | 0.6346983318398143 | T | T | T |

|                    |                    |                    |   |   |   |
|--------------------|--------------------|--------------------|---|---|---|
| 0.5140382861272039 | 0.7380917059995745 | 0.6077374643277890 | T | T | T |
| 0.1501759651505634 | 0.9307900324595623 | 0.6269243763159487 | T | T | T |
| 0.2309940438971115 | 0.2715480937222934 | 0.5982499521931772 | T | T | T |
| 0.4398932241795521 | 0.3892477232944602 | 0.6394522110145672 | T | T | T |
| 0.4808489568642433 | 0.5267357063302893 | 0.6029344421400303 | T | T | T |
| 0.1812885722311288 | 0.1361770510593938 | 0.6314680559878468 | T | T | T |
| 0.5927971938452714 | 0.0672460781495259 | 0.6586446014985721 | T | T | T |
| 0.0626032974418186 | 0.6052839141557937 | 0.5762462622163087 | T | T | T |
| 0.0768300272263928 | 0.8382888333853121 | 0.6666300674326749 | T | T | T |
| 0.5849747868230455 | 0.8223553561598003 | 0.5667803570059261 | T | T | T |
| 0.8278488296484241 | 0.5748251357467459 | 0.6595138683033783 | T | T | T |
| 0.8356735454229121 | 0.1018243526801079 | 0.5779903862725589 | T | T | T |
| 0.9922176826235789 | 0.4813606720174626 | 0.6026594358419989 | T | T | T |
| 0.6807582256734733 | 0.1783351494101487 | 0.6317269931893991 | T | T | T |
| 0.3334784934998384 | 0.5975695085713442 | 0.6584743344596985 | T | T | T |
| 0.3317071443820094 | 0.0621203786206822 | 0.5764176517260333 | T | T | T |
| 0.2000062909725832 | 0.0249969942107987 | 0.6884261697902946 | T | T | T |
| 0.5920935141846745 | 0.5853251839451979 | 0.5668957428902232 | T | T | T |
| 0.6002357437266572 | 0.8263099604771358 | 0.6585010263003306 | T | T | T |
| 0.0617167853931946 | 0.8372859676023914 | 0.5782662446282179 | T | T | T |
| 0.5262853278867203 | 0.9921617800899614 | 0.6025846297698179 | T | T | T |
| 0.1386319591501928 | 0.6754910134624877 | 0.6302413701371162 | T | T | T |
| 0.0647735821895085 | 0.3375725485494234 | 0.6575766072004179 | T | T | T |
| 0.6062835232058037 | 0.3312194452578255 | 0.5767362110175851 | T | T | T |
| 0.8052940800333955 | 0.0353324970768419 | 0.6832221831446953 | T | T | T |
| 0.8224296707284741 | 0.5927915459103369 | 0.5668454412366463 | T | T | T |
| 0.5686333495416416 | 0.6014447391690152 | 0.6598889948349024 | T | T | T |
| 0.1001690641382782 | 0.0632741416420937 | 0.5779044448328953 | T | T | T |
| 0.0511686493120747 | 0.1026936045114676 | 0.6869325128456415 | T | T | T |
| 0.8597307487449984 | 0.1265050435708127 | 0.6877908783080526 | T | T | T |
| 0.8911769825056832 | 0.2798218803425151 | 0.6965211669453600 | T | T | T |

Best + 3

In O Pt

1.0000000000000000

14.6383517878741038 0.0000000000000000 0.0000000000000000

7.3191758939370519 12.6771845178323304 0.0000000000000000

0.0000000000000000 0.0000000000000000 51.0694492725965290

In O Pt

64 96 3

Selective dynamics

Direct

0.7611480013333320 0.0111480013333320 0.4668317439885570 F F F

|                    |                    |                    |   |   |   |
|--------------------|--------------------|--------------------|---|---|---|
| 0.2388520043333315 | 0.9888520043333315 | 0.4746588917436156 | F | F | F |
| 0.7388519966666678 | 0.4888520196666661 | 0.4746588944350378 | F | F | F |
| 0.2611479936666683 | 0.5111480166666666 | 0.4668317466799934 | F | F | F |
| 0.2277039973333359 | 0.7611480013333320 | 0.4668317439885570 | F | F | F |
| 0.7722959913333298 | 0.2388520043333315 | 0.4746588917436156 | F | F | F |
| 0.7722959836666661 | 0.7388519966666678 | 0.4746588944350378 | F | F | F |
| 0.2277039896666651 | 0.2611479936666683 | 0.4668317466799934 | F | F | F |
| 0.0111480013333320 | 0.2277039973333359 | 0.4668317439885570 | F | F | F |
| 0.9888520043333315 | 0.7722959913333369 | 0.4746588917436156 | F | F | F |
| 0.4888520196666661 | 0.7722959836666661 | 0.4746588944350378 | F | F | F |
| 0.5111480166666666 | 0.2277039896666651 | 0.4668317466799934 | F | F | F |
| 0.0000000000000000 | 0.0000000000000000 | 0.4707453188607431 | F | F | F |
| 0.9999999846666654 | 0.5000000076666637 | 0.4707453242436088 | F | F | F |
| 0.5000000076666637 | 0.5000000076666637 | 0.4707453242436088 | F | F | F |
| 0.5000000076666637 | 0.9999999846666654 | 0.4707453242436088 | F | F | F |
| 0.5714614760499686 | 0.3220635869978707 | 0.5335266216303154 | F | F | F |
| 0.0954565668243177 | 0.3446929456050469 | 0.5253897752549719 | F | F | F |
| 0.5951195294231795 | 0.8450268277640021 | 0.5249275287208306 | F | F | F |
| 0.0713873525637467 | 0.8214752461005688 | 0.5333848297685080 | F | F | F |
| 0.1064749369521607 | 0.5714614760499686 | 0.5335266216303154 | F | F | F |
| 0.5598504875706354 | 0.0954565668243177 | 0.5253897752549719 | F | F | F |
| 0.5598536428128256 | 0.5951195294231795 | 0.5249275287208306 | F | F | F |
| 0.1071374013356774 | 0.0713873525637467 | 0.5333848297685080 | F | F | F |
| 0.3220635869978707 | 0.1064749369521607 | 0.5335266216303154 | F | F | F |
| 0.3446929456050469 | 0.5598504875706354 | 0.5253897752549719 | F | F | F |
| 0.8450268277640021 | 0.5598536428128256 | 0.5249275287208306 | F | F | F |
| 0.8214752461005688 | 0.1071374013356774 | 0.5333848297685080 | F | F | F |
| 0.3333333333333357 | 0.3333333333333357 | 0.5295973615149521 | F | F | F |
| 0.3334481086611234 | 0.8333859062698394 | 0.5291799365853791 | F | F | F |
| 0.8333859062698394 | 0.8331659850690301 | 0.5291799365853791 | F | F | F |
| 0.8331659850690301 | 0.3334481086611234 | 0.5291799365853791 | F | F | F |
| 0.7525142026330635 | 0.0073442518469231 | 0.6423628241708013 | T | T | T |
| 0.9047766789432636 | 0.6563279067478451 | 0.5930638057118716 | T | T | T |
| 0.4296504962972890 | 0.6776755335905633 | 0.5834349069712406 | T | T | T |
| 0.2403642948677306 | 0.9816294683169621 | 0.6494818944024781 | T | T | T |
| 0.7433401890567224 | 0.4898357335607195 | 0.6519733360941750 | T | T | T |
| 0.9284455373003411 | 0.1821278925539142 | 0.5826637987134494 | T | T | T |
| 0.4016533544692755 | 0.1557126305907624 | 0.5919493416713985 | T | T | T |
| 0.2669715725122275 | 0.5137390889745062 | 0.6413907416698150 | T | T | T |
| 0.2342877212043681 | 0.7586754745367335 | 0.6446447900208592 | T | T | T |
| 0.4407568117971307 | 0.9044135602403260 | 0.5923021802986961 | T | T | T |
| 0.8951478006006590 | 0.4280011181474140 | 0.5838529190799849 | T | T | T |
| 0.7702650266374664 | 0.2434509568119696 | 0.6474880437373614 | T | T | T |
| 0.7698912217634031 | 0.7397481223878323 | 0.6523538273385338 | T | T | T |

|                    |                    |                    |   |   |   |
|--------------------|--------------------|--------------------|---|---|---|
| 0.8899222448898425 | 0.9282878410777180 | 0.5824336615557606 | T | T | T |
| 0.4425424320889251 | 0.4031731440880449 | 0.5919897161288314 | T | T | T |
| 0.2186310783716112 | 0.2668162048391501 | 0.6411615958653684 | T | T | T |
| 0.0118032851784260 | 0.2264186677343452 | 0.6460119383919762 | T | T | T |
| 0.6559746973277867 | 0.4414703462244411 | 0.5920782292030684 | T | T | T |
| 0.6774739748874502 | 0.8921620608998090 | 0.5832752727991409 | T | T | T |
| 0.9874938390526791 | 0.7823353359062377 | 0.6504350077332725 | T | T | T |
| 0.4938889160693500 | 0.7666004119319676 | 0.6510278836806270 | T | T | T |
| 0.1839660813740460 | 0.8881058079040310 | 0.5821350961132877 | T | T | T |
| 0.1550631767613386 | 0.4427600888198621 | 0.5920350981697405 | T | T | T |
| 0.5113024667453250 | 0.2206853639934968 | 0.6411677074517724 | T | T | T |
| 0.0071065424719260 | 0.9965695309074447 | 0.6348778662903486 | T | T | T |
| 0.6686936579929287 | 0.6658162389823266 | 0.5883909670476399 | T | T | T |
| 0.9931237041856089 | 0.4984169067730655 | 0.6466084603721907 | T | T | T |
| 0.6676720338876143 | 0.1648365866546674 | 0.5874646683051640 | T | T | T |
| 0.4976457676342274 | 0.5124074953234378 | 0.6459580092583873 | T | T | T |
| 0.1636686589659600 | 0.1669568590023550 | 0.5881355343599044 | T | T | T |
| 0.5085244388754149 | 0.9920130113037255 | 0.6457342244408985 | T | T | T |
| 0.1675848802675118 | 0.6685896763539761 | 0.5880648291238699 | T | T | T |
| 0.8159583373333348 | 0.8601013333333327 | 0.4862116819395084 | F | F | F |
| 0.3946230123333336 | 0.9387660083333316 | 0.4585959608606061 | F | F | F |
| 0.9187303516666674 | 0.1545573616666687 | 0.4501329301675625 | F | F | F |
| 0.1692716669999967 | 0.4334446800000009 | 0.4604640541843779 | F | F | F |
| 0.3239403293333325 | 0.8159583373333348 | 0.4862116819395084 | F | F | F |
| 0.6666109793333348 | 0.3946230123333336 | 0.4585959608606061 | F | F | F |
| 0.9267122866666639 | 0.9187303516666674 | 0.4501329301675625 | F | F | F |
| 0.3972836530000023 | 0.1692716669999967 | 0.4604640541843779 | F | F | F |
| 0.8601013333333327 | 0.3239403293333325 | 0.4862116819395084 | F | F | F |
| 0.9387660083333316 | 0.6666109793333348 | 0.4585959608606061 | F | F | F |
| 0.1545573616666687 | 0.9267122866666639 | 0.4501329301675625 | F | F | F |
| 0.4334446800000009 | 0.3972836530000023 | 0.4604640541843779 | F | F | F |
| 0.1840416783333296 | 0.1398986823333317 | 0.4552789502821071 | F | F | F |
| 0.6053770033333308 | 0.0612340073333328 | 0.4828946713610023 | F | F | F |
| 0.0812696673333306 | 0.8454426573333365 | 0.4913577008838672 | F | F | F |
| 0.8307283486666677 | 0.5665553356666635 | 0.4810265780372305 | F | F | F |
| 0.6760596393333316 | 0.1840416783333367 | 0.4552789502821071 | F | F | F |
| 0.3333889893333364 | 0.6053770033333308 | 0.4828946713610023 | F | F | F |
| 0.0732876753333329 | 0.0812696673333306 | 0.4913577008838672 | F | F | F |
| 0.6027163156666688 | 0.8307283486666677 | 0.4810265780372305 | F | F | F |
| 0.1398986823333317 | 0.6760596393333316 | 0.4552789502821071 | F | F | F |
| 0.0612340073333328 | 0.3333889893333364 | 0.4828946713610023 | F | F | F |
| 0.8454426573333365 | 0.0732876753333329 | 0.4913577008838672 | F | F | F |
| 0.5665553356666635 | 0.6027163156666688 | 0.4810265780372305 | F | F | F |
| 0.5157927795144346 | 0.4732687373369373 | 0.5137680585633078 | F | F | F |

|                    |                    |                    |   |   |   |
|--------------------|--------------------|--------------------|---|---|---|
| 0.9389780411721915 | 0.3945739458359014 | 0.5412288865474011 | F | F | F |
| 0.4138055884135099 | 0.1792879430058036 | 0.5501013560831254 | F | F | F |
| 0.1643402231079705 | 0.8991522013241848 | 0.5396430093322451 | F | F | F |
| 0.0109384831486281 | 0.5157927795144346 | 0.5137680585633078 | F | F | F |
| 0.6664480129919070 | 0.9389780411721915 | 0.5412288865474011 | F | F | F |
| 0.4069064685806794 | 0.4138055884135099 | 0.5501013560831254 | F | F | F |
| 0.9365075755678447 | 0.1643402231079705 | 0.5396430093322451 | F | F | F |
| 0.4732687373369373 | 0.0109384831486281 | 0.5137680585633078 | F | F | F |
| 0.3945739458359014 | 0.6664480129919070 | 0.5412288865474011 | F | F | F |
| 0.1792879430058036 | 0.4069064685806794 | 0.5501013560831254 | F | F | F |
| 0.8991522013241848 | 0.9365075755678447 | 0.5396430093322451 | F | F | F |
| 0.1502078384511734 | 0.1932397001298156 | 0.5448734685138632 | F | F | F |
| 0.7272745789267816 | 0.2725057257219632 | 0.5171331615441943 | F | F | F |
| 0.2523256400471894 | 0.4873897408432910 | 0.5086482917388153 | F | F | F |
| 0.5022127006463535 | 0.7673910184547594 | 0.5188430143373637 | F | F | F |
| 0.6565524614190181 | 0.1502078384511734 | 0.5448734685138632 | F | F | F |
| 0.0002196953512481 | 0.7272745789267816 | 0.5171331615441943 | F | F | F |
| 0.2602846191095196 | 0.2523256400471894 | 0.5086482917388153 | F | F | F |
| 0.7303962808988871 | 0.5022127006463535 | 0.5188430143373637 | F | F | F |
| 0.1932397001298156 | 0.6565524614190181 | 0.5448734685138632 | F | F | F |
| 0.2725057257219632 | 0.0002196953512481 | 0.5171331615441943 | F | F | F |
| 0.4873897408432910 | 0.2602846191095196 | 0.5086482917388153 | F | F | F |
| 0.7673910184547594 | 0.7303962808988871 | 0.5188430143373637 | F | F | F |
| 0.8267336271118324 | 0.8540011289443421 | 0.6668509836069063 | T | T | T |
| 0.8492454749432439 | 0.8050468435037038 | 0.5724012476397439 | T | T | T |
| 0.2754292588814801 | 0.7245230648112431 | 0.6002155568220547 | T | T | T |
| 0.3985216007184932 | 0.9395427037528876 | 0.6358589679656923 | T | T | T |
| 0.7508351361717234 | 0.5110876518938224 | 0.6096790869239656 | T | T | T |
| 0.9158977160282786 | 0.1607274891233958 | 0.6247730656459924 | T | T | T |
| 0.4962931822475384 | 0.2315066058439063 | 0.5985235608478140 | T | T | T |
| 0.1707131263278467 | 0.4403167755766597 | 0.6402391168156868 | T | T | T |
| 0.3318298355118935 | 0.8173139541530305 | 0.6618369547923411 | T | T | T |
| 0.3471244009591001 | 0.8490494731316731 | 0.5720985438962407 | T | T | T |
| 0.9995593002656797 | 0.2733010237738861 | 0.6011310821004368 | T | T | T |
| 0.6633510641357243 | 0.4006534729553132 | 0.6353267559895579 | T | T | T |
| 0.7401432735627755 | 0.7494093327312311 | 0.6099326123646006 | T | T | T |
| 0.9165050345658610 | 0.9226888592178542 | 0.6246299834400383 | T | T | T |
| 0.2727584565388587 | 0.4961502845220442 | 0.5987736223113043 | T | T | T |
| 0.3882639679016479 | 0.1719718853681135 | 0.6393882434095940 | T | T | T |
| 0.8565438381749751 | 0.3223821561762804 | 0.6661318826269250 | T | T | T |
| 0.8055476356328247 | 0.3456492433557635 | 0.5723702562737164 | T | T | T |
| 0.7242992516406920 | 0.9997651589927065 | 0.5998382092744483 | T | T | T |
| 0.9385557027939465 | 0.6680855047554198 | 0.6374297172690998 | T | T | T |
| 0.5137248200044029 | 0.7390714404064445 | 0.6089484302282266 | T | T | T |

|                    |                    |                    |   |   |   |
|--------------------|--------------------|--------------------|---|---|---|
| 0.1661615449219558 | 0.9183820732509157 | 0.6235145559833264 | T | T | T |
| 0.2303714221332776 | 0.2731910447169932 | 0.5985665945622931 | T | T | T |
| 0.4414962831870075 | 0.3895031597151806 | 0.6396608170982454 | T | T | T |
| 0.4839968006185135 | 0.5257809289117652 | 0.6033877109310126 | T | T | T |
| 0.1829505256938358 | 0.1379972496010281 | 0.6319370486594728 | T | T | T |
| 0.5949371873840157 | 0.0651547856075729 | 0.6581643783673357 | T | T | T |
| 0.0622571022298383 | 0.6067162513638459 | 0.5769576974396010 | T | T | T |
| 0.0779809966134287 | 0.8522161610770077 | 0.6668464403837865 | T | T | T |
| 0.5863591784717155 | 0.8201650716758901 | 0.5673162507685598 | T | T | T |
| 0.8290133787363640 | 0.5724281582674005 | 0.6605472481361425 | T | T | T |
| 0.8365432335546714 | 0.1004949916870179 | 0.5780641080630735 | T | T | T |
| 0.9913396612867262 | 0.4846160760653698 | 0.6040533144565362 | T | T | T |
| 0.6811054393561872 | 0.1771401924276954 | 0.6313805006211519 | T | T | T |
| 0.3373102035887215 | 0.5979046516323736 | 0.6585004294334429 | T | T | T |
| 0.3311716593700582 | 0.0624387289089961 | 0.5767544779909011 | T | T | T |
| 0.0831657267423113 | 0.0677527915325622 | 0.6671334172686965 | T | T | T |
| 0.5943410305582091 | 0.5859262880231026 | 0.5673002320246742 | T | T | T |
| 0.6009947488156188 | 0.8275460204226626 | 0.6602408879373264 | T | T | T |
| 0.0625105119534301 | 0.8374878348874059 | 0.5783017711598647 | T | T | T |
| 0.5255737917276707 | 0.9917103780622016 | 0.6031631690296048 | T | T | T |
| 0.1402361249421316 | 0.6801591572881209 | 0.6320960241536608 | T | T | T |
| 0.0643686805737329 | 0.3358137110985921 | 0.6582518588450248 | T | T | T |
| 0.6065007750710704 | 0.3320292910637588 | 0.5767803750514482 | T | T | T |
| 0.7999528428503543 | 0.1069925632288031 | 0.7115033025102357 | T | T | T |
| 0.8228118510137596 | 0.5927055682611421 | 0.5676650400581974 | T | T | T |
| 0.5756356746578963 | 0.5980358347892676 | 0.6602206462266016 | T | T | T |
| 0.0998128251872949 | 0.0623030647776295 | 0.5781613396422437 | T | T | T |
| 0.9821230678228728 | 0.0107571312239390 | 0.6832731324466348 | T | T | T |
| 0.8248910674777632 | 0.9827313515179832 | 0.6912405185499201 | T | T | T |
| 0.8394405347407128 | 0.2006835427820725 | 0.6941606696458917 | T | T | T |

Best+ 5

In O Pt

|                     |                     |                     |  |
|---------------------|---------------------|---------------------|--|
| 1.0000000000000000  |                     |                     |  |
| 14.6383517878741038 | 0.0000000000000000  | 0.0000000000000000  |  |
| 7.3191758939370519  | 12.6771845178323304 | 0.0000000000000000  |  |
| 0.0000000000000000  | 0.0000000000000000  | 51.0694492725965290 |  |

In O Pt

64 96 3

Selective dynamics

Direct

|                    |                    |                    |   |   |   |
|--------------------|--------------------|--------------------|---|---|---|
| 0.7611480013333320 | 0.0111480013333320 | 0.4668317439885570 | F | F | F |
| 0.2388520043333315 | 0.9888520043333315 | 0.4746588917436156 | F | F | F |

|                    |                    |                    |   |   |   |
|--------------------|--------------------|--------------------|---|---|---|
| 0.7388519966666678 | 0.4888520196666661 | 0.4746588944350378 | F | F | F |
| 0.2611479936666683 | 0.5111480166666666 | 0.4668317466799934 | F | F | F |
| 0.2277039973333359 | 0.7611480013333320 | 0.4668317439885570 | F | F | F |
| 0.7722959913333298 | 0.2388520043333315 | 0.4746588917436156 | F | F | F |
| 0.7722959836666661 | 0.7388519966666678 | 0.4746588944350378 | F | F | F |
| 0.2277039896666651 | 0.2611479936666683 | 0.4668317466799934 | F | F | F |
| 0.0111480013333320 | 0.2277039973333359 | 0.4668317439885570 | F | F | F |
| 0.9888520043333315 | 0.7722959913333369 | 0.4746588917436156 | F | F | F |
| 0.4888520196666661 | 0.7722959836666661 | 0.4746588944350378 | F | F | F |
| 0.5111480166666666 | 0.2277039896666651 | 0.4668317466799934 | F | F | F |
| 0.0000000000000000 | 0.0000000000000000 | 0.4707453188607431 | F | F | F |
| 0.9999999846666654 | 0.5000000076666637 | 0.4707453242436088 | F | F | F |
| 0.5000000076666637 | 0.5000000076666637 | 0.4707453242436088 | F | F | F |
| 0.5000000076666637 | 0.9999999846666654 | 0.4707453242436088 | F | F | F |
| 0.5714614760499686 | 0.3220635869978707 | 0.5335266216303154 | F | F | F |
| 0.0954565668243177 | 0.3446929456050469 | 0.5253897752549719 | F | F | F |
| 0.5951195294231795 | 0.8450268277640021 | 0.5249275287208306 | F | F | F |
| 0.0713873525637467 | 0.8214752461005688 | 0.5333848297685080 | F | F | F |
| 0.1064749369521607 | 0.5714614760499686 | 0.5335266216303154 | F | F | F |
| 0.5598504875706354 | 0.0954565668243177 | 0.5253897752549719 | F | F | F |
| 0.5598536428128256 | 0.5951195294231795 | 0.5249275287208306 | F | F | F |
| 0.1071374013356774 | 0.0713873525637467 | 0.5333848297685080 | F | F | F |
| 0.3220635869978707 | 0.1064749369521607 | 0.5335266216303154 | F | F | F |
| 0.3446929456050469 | 0.5598504875706354 | 0.5253897752549719 | F | F | F |
| 0.8450268277640021 | 0.5598536428128256 | 0.5249275287208306 | F | F | F |
| 0.8214752461005688 | 0.1071374013356774 | 0.5333848297685080 | F | F | F |
| 0.3333333333333357 | 0.3333333333333357 | 0.5295973615149521 | F | F | F |
| 0.3334481086611234 | 0.8333859062698394 | 0.5291799365853791 | F | F | F |
| 0.8333859062698394 | 0.8331659850690301 | 0.5291799365853791 | F | F | F |
| 0.8331659850690301 | 0.3334481086611234 | 0.5291799365853791 | F | F | F |
| 0.7616426346313175 | 0.0088487540385633 | 0.6456476663337238 | T | T | T |
| 0.9035938617354827 | 0.6556496990750766 | 0.5925492225653921 | T | T | T |
| 0.4327435412973946 | 0.6773301151987259 | 0.5828200715911106 | T | T | T |
| 0.2324612393127325 | 0.9828639566410265 | 0.6527676285602149 | T | T | T |
| 0.7412860448445361 | 0.4901069106038458 | 0.6512073554532206 | T | T | T |
| 0.9274046983372523 | 0.1837528035857477 | 0.5822661715430982 | T | T | T |
| 0.4029331977307605 | 0.1557501350129646 | 0.5922146414858702 | T | T | T |
| 0.2639960451599202 | 0.5147974481809292 | 0.6420900114476019 | T | T | T |
| 0.2397832028216767 | 0.7512550273071820 | 0.6366191013688071 | T | T | T |
| 0.4386239640723481 | 0.9059849636608969 | 0.5931626590258077 | T | T | T |
| 0.8928867415835510 | 0.4292517190569732 | 0.5834548873641797 | T | T | T |
| 0.7812054236840849 | 0.2360362173121764 | 0.6504025920652615 | T | T | T |
| 0.7678207834669446 | 0.7402327800754983 | 0.6508723663876429 | T | T | T |
| 0.8903143716452474 | 0.9278306643649260 | 0.5832148533829261 | T | T | T |

|                    |                    |                    |   |   |   |
|--------------------|--------------------|--------------------|---|---|---|
| 0.4413230459349063 | 0.4043651825345168 | 0.5921958395001732 | T | T | T |
| 0.2197854472345240 | 0.2645764193536129 | 0.6413740096056310 | T | T | T |
| 0.0075712582815911 | 0.2351586401114271 | 0.6440390303597785 | T | T | T |
| 0.6551790532734427 | 0.4396878177063456 | 0.5932301022282956 | T | T | T |
| 0.6774502110205503 | 0.8946630818779184 | 0.5837720672413584 | T | T | T |
| 0.9829642677849110 | 0.7734749698532355 | 0.6519867485568190 | T | T | T |
| 0.4978121662064969 | 0.7658865101957636 | 0.6512799680514725 | T | T | T |
| 0.1800394362551487 | 0.8927797518755242 | 0.5820987854509251 | T | T | T |
| 0.1547688755059268 | 0.4413612840626661 | 0.5921823518300868 | T | T | T |
| 0.5142524087918040 | 0.2211898958909078 | 0.6418037773793397 | T | T | T |
| 0.9945497110762327 | 0.0073826666483948 | 0.6365316437813975 | T | T | T |
| 0.6668423770209887 | 0.6673479846010567 | 0.5877212811801407 | T | T | T |
| 0.9913660487038736 | 0.4973693238617470 | 0.6460775748332649 | T | T | T |
| 0.6694667912440156 | 0.1642321896105367 | 0.5883438656887744 | T | T | T |
| 0.4978803415178680 | 0.5100256846897221 | 0.6472416184186486 | T | T | T |
| 0.1649350459954121 | 0.1662966087158587 | 0.5882878371968919 | T | T | T |
| 0.5087919692330825 | 0.9936155311240439 | 0.6466597053065299 | T | T | T |
| 0.1626188926902655 | 0.6674099711739722 | 0.5870471398653814 | T | T | T |
| 0.8159583373333348 | 0.8601013333333327 | 0.4862116819395084 | F | F | F |
| 0.3946230123333336 | 0.9387660083333316 | 0.4585959608606061 | F | F | F |
| 0.9187303516666674 | 0.1545573616666687 | 0.4501329301675625 | F | F | F |
| 0.1692716669999967 | 0.4334446800000009 | 0.4604640541843779 | F | F | F |
| 0.3239403293333325 | 0.8159583373333348 | 0.4862116819395084 | F | F | F |
| 0.6666109793333348 | 0.3946230123333336 | 0.4585959608606061 | F | F | F |
| 0.9267122866666639 | 0.9187303516666674 | 0.4501329301675625 | F | F | F |
| 0.3972836530000023 | 0.1692716669999967 | 0.4604640541843779 | F | F | F |
| 0.8601013333333327 | 0.3239403293333325 | 0.4862116819395084 | F | F | F |
| 0.9387660083333316 | 0.6666109793333348 | 0.4585959608606061 | F | F | F |
| 0.1545573616666687 | 0.9267122866666639 | 0.4501329301675625 | F | F | F |
| 0.4334446800000009 | 0.3972836530000023 | 0.4604640541843779 | F | F | F |
| 0.1840416783333296 | 0.1398986823333317 | 0.4552789502821071 | F | F | F |
| 0.6053770033333308 | 0.0612340073333328 | 0.4828946713610023 | F | F | F |
| 0.0812696673333306 | 0.8454426573333365 | 0.4913577008838672 | F | F | F |
| 0.8307283486666677 | 0.5665553356666635 | 0.4810265780372305 | F | F | F |
| 0.6760596393333316 | 0.1840416783333367 | 0.4552789502821071 | F | F | F |
| 0.3333889893333364 | 0.6053770033333308 | 0.4828946713610023 | F | F | F |
| 0.0732876753333329 | 0.0812696673333306 | 0.4913577008838672 | F | F | F |
| 0.6027163156666688 | 0.8307283486666677 | 0.4810265780372305 | F | F | F |
| 0.1398986823333317 | 0.6760596393333316 | 0.4552789502821071 | F | F | F |
| 0.0612340073333328 | 0.3333889893333364 | 0.4828946713610023 | F | F | F |
| 0.8454426573333365 | 0.0732876753333329 | 0.4913577008838672 | F | F | F |
| 0.5665553356666635 | 0.6027163156666688 | 0.4810265780372305 | F | F | F |
| 0.5157927795144346 | 0.4732687373369373 | 0.5137680585633078 | F | F | F |
| 0.9389780411721915 | 0.3945739458359014 | 0.5412288865474011 | F | F | F |



|                    |                     |                    |   |   |   |
|--------------------|---------------------|--------------------|---|---|---|
| 0.4138055884135099 | 0.1792879430058036  | 0.5501013560831254 | F | F | F |
| 0.1643402231079705 | 0.8991522013241848  | 0.5396430093322451 | F | F | F |
| 0.0109384831486281 | 0.5157927795144346  | 0.5137680585633078 | F | F | F |
| 0.6664480129919070 | 0.9389780411721915  | 0.5412288865474011 | F | F | F |
| 0.4069064685806794 | 0.4138055884135099  | 0.5501013560831254 | F | F | F |
| 0.9365075755678447 | 0.1643402231079705  | 0.5396430093322451 | F | F | F |
| 0.4732687373369373 | 0.0109384831486281  | 0.5137680585633078 | F | F | F |
| 0.3945739458359014 | 0.6664480129919070  | 0.5412288865474011 | F | F | F |
| 0.1792879430058036 | 0.4069064685806794  | 0.5501013560831254 | F | F | F |
| 0.8991522013241848 | 0.9365075755678447  | 0.5396430093322451 | F | F | F |
| 0.1502078384511734 | 0.1932397001298156  | 0.5448734685138632 | F | F | F |
| 0.7272745789267816 | 0.2725057257219632  | 0.5171331615441943 | F | F | F |
| 0.2523256400471894 | 0.4873897408432910  | 0.5086482917388153 | F | F | F |
| 0.5022127006463535 | 0.7673910184547594  | 0.5188430143373637 | F | F | F |
| 0.6565524614190181 | 0.1502078384511734  | 0.5448734685138632 | F | F | F |
| 0.0002196953512481 | 0.7272745789267816  | 0.5171331615441943 | F | F | F |
| 0.2602846191095196 | 0.2523256400471894  | 0.5086482917388153 | F | F | F |
| 0.7303962808988871 | 0.5022127006463535  | 0.5188430143373637 | F | F | F |
| 0.1932397001298156 | 0.6565524614190181  | 0.5448734685138632 | F | F | F |
| 0.2725057257219632 | 0.0002196953512481  | 0.5171331615441943 | F | F | F |
| 0.4873897408432910 | 0.2602846191095196  | 0.5086482917388153 | F | F | F |
| 0.7673910184547594 | 0.7303962808988871  | 0.5188430143373637 | F | F | F |
| 0.8140060295406928 | 0.8537305896534010  | 0.6618332504076568 | T | T | T |
| 0.8493774480513449 | 0.8053452302583942  | 0.5724884826816328 | T | T | T |
| 0.2750316443493737 | 0.7230256995784562  | 0.5963371817242598 | T | T | T |
| 0.3937139512654919 | 0.9397851870021470  | 0.6378737152267852 | T | T | T |
| 0.7472299282693544 | 0.5128411051698147  | 0.6091224154562511 | T | T | T |
| 0.9155973254118159 | 0.1651936972855889  | 0.6236107093408886 | T | T | T |
| 0.4966334452284048 | 0.2327016420253561  | 0.5991895261400223 | T | T | T |
| 0.1704142948916040 | 0.4393605926059838  | 0.6398585671052038 | T | T | T |
| 0.3374966115257607 | 0.8061072670369113  | 0.6620527879584065 | T | T | T |
| 0.3454115922219163 | 0.8501056768818882  | 0.5725128891681274 | T | T | T |
| 0.0005182299770606 | 0.2749914168936226  | 0.6001793404281369 | T | T | T |
| 0.6615863190408282 | 0.3956797930085880  | 0.6366559214591639 | T | T | T |
| 0.7394206167473426 | 0.7479777859974575  | 0.6088670003164036 | T | T | T |
| 0.9265592984109301 | 0.9132718100919257  | 0.6257059149123739 | T | T | T |
| 0.2714202821022684 | 0.4971738504815425  | 0.5991797625157244 | T | T | T |
| 0.3893965671509191 | 0.1720218344357204  | 0.6397843813601349 | T | T | T |
| 0.8524680439682462 | 0.3290940069699163  | 0.6623675745885130 | T | T | T |
| 0.8036976204750428 | 0.3469192545436799  | 0.5722449388901045 | T | T | T |
| 0.7273354828653680 | -0.0001131855678878 | 0.6009466891916077 | T | T | T |
| 0.9409132300035967 | 0.6611917530236057  | 0.6360049914046172 | T | T | T |
| 0.5124731581222121 | 0.7404522728002206  | 0.6090949211672109 | T | T | T |
| 0.1595608956740936 | 0.9186699878788009  | 0.6248220836416635 | T | T | T |

|                    |                    |                    |   |   |   |
|--------------------|--------------------|--------------------|---|---|---|
| 0.2311535601538071 | 0.2720147498738407 | 0.5987729858086049 | T | T | T |
| 0.4375082048606962 | 0.3936305649881819 | 0.6407115366636936 | T | T | T |
| 0.4808760435859727 | 0.5285211904607339 | 0.6045074554243715 | T | T | T |
| 0.1817365958056271 | 0.1364579992852415 | 0.6322082924417961 | T | T | T |
| 0.5982441742546633 | 0.0662379879270219 | 0.6586256747905656 | T | T | T |
| 0.0603385060777629 | 0.6046919110433606 | 0.5762477679247235 | T | T | T |
| 0.1726290760185720 | 0.9144380231880851 | 0.6959849870638328 | T | T | T |
| 0.5843728157391294 | 0.8231917794080398 | 0.5675410160131733 | T | T | T |
| 0.8268741911521040 | 0.5734277158456826 | 0.6600079318512074 | T | T | T |
| 0.8375095253676657 | 0.0997493801949323 | 0.5781990494955512 | T | T | T |
| 0.9905069066619565 | 0.4834234156912909 | 0.6034770693005230 | T | T | T |
| 0.6822289818846172 | 0.1796376541040331 | 0.6328603424491350 | T | T | T |
| 0.3323056447746857 | 0.6035889713134484 | 0.6615519326823837 | T | T | T |
| 0.3319073618917232 | 0.0623894558429776 | 0.5768708780952715 | T | T | T |
| 0.0666529164309863 | 0.0854700319504761 | 0.6664457045959558 | T | T | T |
| 0.5946316079762570 | 0.5839331750702770 | 0.5673176376333797 | T | T | T |
| 0.6003482427025512 | 0.8281872740169522 | 0.6601234691149643 | T | T | T |
| 0.0624273212277645 | 0.8373467743574153 | 0.5780002811634776 | T | T | T |
| 0.5247751899593361 | 0.9914972765533228 | 0.6040912398572201 | T | T | T |
| 0.1378566242062659 | 0.6819090687295424 | 0.6307498965543367 | T | T | T |
| 0.0651775763018118 | 0.3368390475019107 | 0.6584758827703969 | T | T | T |
| 0.6054263284104938 | 0.3325426477886215 | 0.5771157805026448 | T | T | T |
| 0.8603553378754143 | 0.0728541869446723 | 0.6678563805610188 | T | T | T |
| 0.8212144776214262 | 0.5932236956849752 | 0.5672445968256549 | T | T | T |
| 0.5746615584436945 | 0.5982024585600331 | 0.6604991040315447 | T | T | T |
| 0.0995345481649984 | 0.0635938648367021 | 0.5780477084749558 | T | T | T |
| 0.2386577097151230 | 0.7671606006733807 | 0.6857669787126950 | T | T | T |
| 0.0537827437287081 | 0.7994640483558629 | 0.6975535340088566 | T | T | T |
| 0.0232632737259747 | 0.9844421717001323 | 0.6858329428172781 | T | T | T |

---

**Pt- dimer on Indium Tin Oxide ( In order of increasing energy as shown in the SI)**

Best:

In Sn O Pt

1.0000000000000000

14.6581653332033461 0.0000000000000000 0.0000000000000000

7.3189795989957736 12.7095316657975506 0.0000000000000000

-0.0098891034462902 -0.0168642175486257 51.7150080587397056

In Sn O Pt

56 8 96 2

Selective dynamics

Direct

|                    |                    |                    |   |   |   |
|--------------------|--------------------|--------------------|---|---|---|
| 0.7601334683925316 | 0.0111196284508281 | 0.4659634855339050 | F | F | F |
| 0.2397990222127078 | 0.9863352678444528 | 0.4737760756088107 | F | F | F |
| 0.7715588052310096 | 0.2382440998621718 | 0.4737760756088107 | F | F | F |
| 0.0114253481492099 | 0.2271244657591041 | 0.4659634855339050 | F | F | F |
| 0.9885071424342016 | 0.7703304135794511 | 0.4737760756088107 | F | F | F |
| 0.9992903736448469 | 0.4987274529686729 | 0.4698697869370179 | F | F | F |
| 0.5006083460974438 | 0.9974548753487298 | 0.4698697869370179 | F | F | F |
| 0.5711026190239110 | 0.3212438999490672 | 0.5325343176450374 | F | F | F |
| 0.0957701894278102 | 0.3438156643639090 | 0.5244126049570497 | F | F | F |
| 0.5954002788407777 | 0.8428761420777775 | 0.5239512181533499 | F | F | F |
| 0.0723457897014868 | 0.8193845017652066 | 0.5323927895013369 | F | F | F |
| 0.1070648802758711 | 0.5700070441001301 | 0.5325343176450374 | F | F | F |
| 0.5592163182809529 | 0.0952136194229070 | 0.5244126049570497 | F | F | F |
| 0.5598611324288072 | 0.5936048851403370 | 0.5239512181533499 | F | F | F |
| 0.1070842580214730 | 0.0712056639447667 | 0.5323927895013369 | F | F | F |
| 0.3217649856391844 | 0.1062039465938440 | 0.5325343176450374 | F | F | F |
| 0.3449459772301964 | 0.5584256068562183 | 0.5244126049570497 | F | F | F |
| 0.8446035586083482 | 0.5584287540679753 | 0.5239512181533499 | F | F | F |
| 0.8205024372159997 | 0.1068647249330610 | 0.5323927895013369 | F | F | F |
| 0.3340676120032526 | 0.8312648480018296 | 0.5281957169818696 | F | F | F |
| 0.8324680001261981 | 0.3325994467597084 | 0.5281957169818696 | F | F | F |
| 0.3333108283129889 | 0.3324849635476852 | 0.5286123655445181 | F | F | F |
| 0.8333293577484682 | 0.8310454865245305 | 0.5281957169818696 | F | F | F |
| 0.2283736683972180 | 0.7592107964331092 | 0.4659634855339050 | F | F | F |
| 0.4999662501356283 | 0.4987274529686729 | 0.4698697869370179 | F | F | F |
| 0.7722008935562172 | 0.7369715375365402 | 0.4737760782952236 | F | F | F |
| 0.4891830112588380 | 0.7703304059322917 | 0.4737760782952236 | F | F | F |
| 0.7384810650628779 | 0.4876078378172437 | 0.4737760782952236 | F | F | F |
| 0.7610635534627560 | 0.0161751843220338 | 0.6421696544817993 | T | T | T |
| 0.9066400033912941 | 0.6529923165289062 | 0.5897556967586276 | T | T | T |
| 0.4257614305240763 | 0.6779162071249438 | 0.5819082254261109 | T | T | T |
| 0.2341720271269008 | 0.9828142152582350 | 0.6450335298032288 | T | T | T |
| 0.9302251264786890 | 0.1773862862775558 | 0.5819543890614280 | T | T | T |
| 0.4029806864089267 | 0.1539033787113716 | 0.5903965405345488 | T | T | T |
| 0.2606619494802385 | 0.5135418715700503 | 0.6385060131933085 | T | T | T |
| 0.2233833650324795 | 0.7587723828264984 | 0.6411347414491654 | T | T | T |
| 0.4400792670819247 | 0.9053587903298562 | 0.5904242342243384 | T | T | T |
| 0.8944963951953305 | 0.4264478053375330 | 0.5829293362835017 | T | T | T |
| 0.7831106827579138 | 0.2330823642128305 | 0.6455036655921542 | T | T | T |
| 0.8917172345456030 | 0.9300186240271597 | 0.5816689207957861 | T | T | T |
| 0.4403921261929503 | 0.3991257274781105 | 0.5899429608642609 | T | T | T |
| 0.2247191403802473 | 0.2579145884245549 | 0.6385955119400537 | T | T | T |
| 0.0133352241073506 | 0.2268984456479540 | 0.6419054281391705 | T | T | T |
| 0.6519810345196599 | 0.4397352338575527 | 0.5903632567371560 | T | T | T |

|                    |                    |                    |   |   |   |
|--------------------|--------------------|--------------------|---|---|---|
| 0.6789657396288554 | 0.8936569267525079 | 0.5821564321590954 | T | T | T |
| 0.9857422939678058 | 0.7870810479494041 | 0.6437914512335247 | T | T | T |
| 0.1768819199911873 | 0.8912322257965457 | 0.5817773129853615 | T | T | T |
| 0.1542350166548765 | 0.4398909907642622 | 0.5903565963737986 | T | T | T |
| 0.5154674423994263 | 0.2207120467364621 | 0.6386392236949330 | T | T | T |
| 0.6657296099116088 | 0.6661499654278031 | 0.5874159864534642 | T | T | T |
| 0.0072199197155984 | 0.4923387597605124 | 0.6456598732821442 | T | T | T |
| 0.6690607052457269 | 0.1635105472952885 | 0.5861663712966931 | T | T | T |
| 0.4844175467804911 | 0.5046706352792113 | 0.6420073668084265 | T | T | T |
| 0.1648250910442064 | 0.1656972858631237 | 0.5859721190309528 | T | T | T |
| 0.5121668922969258 | 0.9979995560692568 | 0.6438558248373506 | T | T | T |
| 0.1673738964691019 | 0.6658873791392198 | 0.5858043685015877 | T | T | T |
| 0.2277315647397131 | 0.2604833434644362 | 0.4659634882203321 | F | F | F |
| 0.5107495099301005 | 0.2271244581119447 | 0.4659634882203321 | F | F | F |
| 0.2614514102691530 | 0.5098470890666533 | 0.4659634882203321 | F | F | F |
| 0.0000000000000000 | 0.0000000000000000 | 0.4698697815641637 | F | F | F |
| 0.7217100187515783 | 0.4893396660704079 | 0.6492582431016832 | T | T | T |
| 0.7852620011801814 | 0.7450892894394623 | 0.6475928446780959 | T | T | T |
| 0.4785142101633279 | 0.7660292532759129 | 0.6477445363072283 | T | T | T |
| 0.0007440830421332 | 0.0015358978175288 | 0.6459733947526254 | T | T | T |
| 0.8159599359379399 | 0.8579122813819282 | 0.4853073788173816 | F | F | F |
| 0.3952951534094780 | 0.9363767461815229 | 0.4577430201053687 | F | F | F |
| 0.9176869787037418 | 0.1541639962793013 | 0.4492957297685578 | F | F | F |
| 0.1695994874784077 | 0.4323415158892061 | 0.4596076389699917 | F | F | F |
| 0.3245503040634432 | 0.8138816341340984 | 0.4853073788173816 | F | F | F |
| 0.6662166882857647 | 0.3936186536121724 | 0.4577430201053687 | F | F | F |
| 0.9266394692931357 | 0.9163920824521128 | 0.4492957297685578 | F | F | F |
| 0.3969640192055408 | 0.1688408520964444 | 0.4596076389699917 | F | F | F |
| 0.8593547298765358 | 0.3231158657700490 | 0.4853073788173816 | F | F | F |
| 0.9383531281826833 | 0.6649143814923804 | 0.4577430201053687 | F | F | F |
| 0.1555385218810557 | 0.9243537025546544 | 0.4492957297685578 | F | F | F |
| 0.4333689782550181 | 0.3962725226573838 | 0.4596076389699917 | F | F | F |
| 0.1839725646666253 | 0.1395426248879019 | 0.4544321788212997 | F | F | F |
| 0.6046373471950943 | 0.0610781600883072 | 0.4819965375333126 | F | F | F |
| 0.0822455252339367 | 0.8432909133153856 | 0.4904438267021192 | F | F | F |
| 0.8303330131261575 | 0.5651133903806240 | 0.4801319186686825 | F | F | F |
| 0.6753821496046513 | 0.1835732721357388 | 0.4544321788212997 | F | F | F |
| 0.3337157653823439 | 0.6038362526576577 | 0.4819965375333126 | F | F | F |
| 0.0732929777215929 | 0.0810628271425600 | 0.4904438267021192 | F | F | F |
| 0.6029684344625679 | 0.8286140541733857 | 0.4801319186686825 | F | F | F |
| 0.1405777706676758 | 0.6743389936194006 | 0.4544321788212997 | F | F | F |
| 0.0615793723615283 | 0.3325404778970764 | 0.4819965375333126 | F | F | F |
| 0.8443939819834299 | 0.0731011501850887 | 0.4904438267021192 | F | F | F |
| 0.5665635222892007 | 0.6011823367320730 | 0.4801319186686825 | F | F | F |

|                    |                    |                    |   |   |   |
|--------------------|--------------------|--------------------|---|---|---|
| 0.5157033466994037 | 0.4720642166451867 | 0.5128125034488065 | F | F | F |
| 0.9382155266378476 | 0.3935697119943384 | 0.5402222571510507 | F | F | F |
| 0.4134764846239136 | 0.1788316355844657 | 0.5490782248169097 | F | F | F |
| 0.1652727673189958 | 0.8968637606432637 | 0.5386393295024519 | F | F | F |
| 0.0115860744760994 | 0.5144800304850392 | 0.5128125034488065 | F | F | F |
| 0.6667529985908658 | 0.9365882393736200 | 0.5402222571510507 | F | F | F |
| 0.4068878560599956 | 0.4127524079384770 | 0.5490782248169097 | F | F | F |
| 0.9354527360783820 | 0.1639219592684142 | 0.5386393295024519 | F | F | F |
| 0.4726430637634564 | 0.0109106435128155 | 0.5128125034488065 | F | F | F |
| 0.3948964446492127 | 0.6647518299181101 | 0.5402222571510507 | F | F | F |
| 0.1795681442550503 | 0.4058708471200845 | 0.5490782248169097 | F | F | F |
| 0.8991394664805483 | 0.9341240613744048 | 0.5386393295024519 | F | F | F |
| 0.1502529583315635 | 0.1927478839608767 | 0.5438600605743957 | F | F | F |
| 0.7266414664239278 | 0.2718121688495998 | 0.5161713476883989 | F | F | F |
| 0.2526104716998674 | 0.4861492806533860 | 0.5077022588577265 | F | F | F |
| 0.5025193335949325 | 0.7654379243932397 | 0.5178780203333417 | F | F | F |
| 0.6558578905342074 | 0.1498255430760409 | 0.5438600605743957 | F | F | F |
| 0.0011533585709813 | 0.7254235855908746 | 0.5161713476883989 | F | F | F |
| 0.2602568251204715 | 0.2516834436997044 | 0.5077022588577265 | F | F | F |
| 0.7300539366250547 | 0.5009345144027506 | 0.5178780203333417 | F | F | F |
| 0.1938216360732028 | 0.6548814636061238 | 0.5438600605743957 | F | F | F |
| 0.2721376599440504 | 0.0002191362025528 | 0.5161713476883989 | F | F | F |
| 0.4870651881186276 | 0.2596221662899509 | 0.5077022588577265 | F | F | F |
| 0.7672916996579389 | 0.7285373424900783 | 0.5178780203333417 | F | F | F |
| 0.8253463855446127 | 0.8560984897733800 | 0.6576548034834564 | T | T | T |
| 0.8493474581958301 | 0.8048742388786885 | 0.5709890073981545 | T | T | T |
| 0.2713893151196595 | 0.7274399284651606 | 0.5983567657972620 | T | T | T |
| 0.4039686277607858 | 0.9344244409608548 | 0.6354747032215867 | T | T | T |
| 0.7427911667356160 | 0.5125870279190825 | 0.6095072782390276 | T | T | T |
| 0.9302698844140619 | 0.1453692835624812 | 0.6232923274349356 | T | T | T |
| 0.4971403510697223 | 0.2290217430887787 | 0.5963446267139035 | T | T | T |
| 0.1748010431819709 | 0.4324694416822128 | 0.6370266109931225 | T | T | T |
| 0.3249525928848300 | 0.8154982106102587 | 0.6559954877573443 | T | T | T |
| 0.3437744406753498 | 0.8497991682759879 | 0.5710925923506696 | T | T | T |
| 0.0004185463485804 | 0.2709878921435104 | 0.5985666178664688 | T | T | T |
| 0.6570025441831990 | 0.3957617252694286 | 0.6343261357239820 | T | T | T |
| 0.7389681777950622 | 0.7490358329407469 | 0.6088715253962322 | T | T | T |
| 0.9253217557976364 | 0.9351033689662441 | 0.6225356680363098 | T | T | T |
| 0.2706415544962426 | 0.4935368916480499 | 0.5962039517820152 | T | T | T |
| 0.3930704363199573 | 0.1688398271780510 | 0.6369755383336920 | T | T | T |
| 0.8478833103414747 | 0.3332467877432555 | 0.6558237370665780 | T | T | T |
| 0.8050773769518947 | 0.3452383838417331 | 0.5715678114348043 | T | T | T |
| 0.7286191698772276 | 0.9985408592740381 | 0.5988556984638533 | T | T | T |
| 0.9401794154810617 | 0.6749246422497266 | 0.6299578862941723 | T | T | T |

|                    |                    |                    |   |   |   |
|--------------------|--------------------|--------------------|---|---|---|
| 0.5070866750146896 | 0.7441397210134023 | 0.6078343559214751 | T | T | T |
| 0.1449547428805071 | 0.9252557664361543 | 0.6229343711434812 | T | T | T |
| 0.2328828467657139 | 0.2699860654919388 | 0.5963298103479143 | T | T | T |
| 0.4327931896254196 | 0.3883394187689717 | 0.6366571602293536 | T | T | T |
| 0.4774653609246019 | 0.5233942787963444 | 0.5999857630501462 | T | T | T |
| 0.1884643337829743 | 0.1322316389743750 | 0.6275792042719094 | T | T | T |
| 0.6013206333825419 | 0.0714378105357030 | 0.6561023007044305 | T | T | T |
| 0.0627780738517083 | 0.6031940173302920 | 0.5741275796083147 | T | T | T |
| 0.0731618366214599 | 0.8510832705645721 | 0.6628397005914689 | T | T | T |
| 0.5877705528157361 | 0.8189573699862135 | 0.5666254602249509 | T | T | T |
| 0.6987873447668375 | 0.5679074330597657 | 0.6868098544048128 | T | T | T |
| 0.8358216874410639 | 0.1013066439175370 | 0.5756831652098111 | T | T | T |
| 0.9928002921918881 | 0.4818163919048871 | 0.6023989848918775 | T | T | T |
| 0.6778985601925440 | 0.1862938809223800 | 0.6281997416382361 | T | T | T |
| 0.3266156088639663 | 0.5989825368487114 | 0.6558729412501547 | T | T | T |
| 0.3328633840588403 | 0.0608858461991927 | 0.5746604559849038 | T | T | T |
| 0.0788676535850592 | 0.0724631835650444 | 0.6631958214143344 | T | T | T |
| 0.5916190341215308 | 0.5867601783930845 | 0.5666010789953210 | T | T | T |
| 0.6297472329718272 | 0.8559228593762660 | 0.6615765703699656 | T | T | T |
| 0.0623610101595252 | 0.8338716082367250 | 0.5757362951384710 | T | T | T |
| 0.5259350173280246 | 0.9908786374895914 | 0.6015914308730200 | T | T | T |
| 0.1375746869589941 | 0.6758981977020871 | 0.6278505809700224 | T | T | T |
| 0.0751091413134334 | 0.3232920766796359 | 0.6558319672914524 | T | T | T |
| 0.6056134985886028 | 0.3306496734820759 | 0.5746560370373112 | T | T | T |
| 0.8514709069217166 | 0.0776985107702415 | 0.6635384859880802 | T | T | T |
| 0.8198604830617120 | 0.5906436703848900 | 0.5668859045436135 | T | T | T |
| 0.5527213953932463 | 0.5986131162162199 | 0.6488167874663244 | T | T | T |
| 0.1013303052335092 | 0.0616370106501533 | 0.5756313978508593 | T | T | T |
| 0.8362898380691420 | 0.5671570889985869 | 0.6711893548700520 | T | T | T |
| 0.6349179251925904 | 0.7216803619570297 | 0.6757158729997609 | T | T | T |

Best + 1

In Sn O Pt

1.0000000000000000

14.6581653332033461 0.0000000000000000 0.0000000000000000

7.3189795989957736 12.7095316657975506 0.0000000000000000

-0.1539898045825509 0.0117348602194267 44.4205337057521348

In Sn O Pt

56 8 96 2

Selective dynamics

Direct

0.7601299999999966 0.0111199999999982 0.3212997282865118 F F F

0.2434165335433676 0.9854015590178022 0.3303952552037757 F F F

|                    |                    |                    |   |   |   |
|--------------------|--------------------|--------------------|---|---|---|
| 0.7751763166389409 | 0.2373103908289238 | 0.3303952552037757 | F | F | F |
| 0.7758184051208019 | 0.7360378284433793 | 0.3303952583554732 | F | F | F |
| 0.0149432086993002 | 0.2262095211845576 | 0.3212997282865118 | F | F | F |
| 0.9921246538137325 | 0.7693967045361916 | 0.3303952552037757 | F | F | F |
| 0.4928005224042380 | 0.7693966968225325 | 0.3303952583554732 | F | F | F |
| 0.0028580599244989 | 0.4978031261506217 | 0.3258474991741451 | F | F | F |
| 0.5041760321789965 | 0.9965305487398979 | 0.3258474991741451 | F | F | F |
| 0.5754695993874179 | 0.3201690636836290 | 0.3988024242875312 | F | F | F |
| 0.1000335765341589 | 0.3427603350605963 | 0.3893470124551968 | F | F | F |
| 0.5996577811357540 | 0.8418219209004363 | 0.3888098595214231 | F | F | F |
| 0.0767109653050468 | 0.8183100051456691 | 0.3986376552181525 | F | F | F |
| 0.1114318610020959 | 0.5689322078448171 | 0.3988024242875312 | F | F | F |
| 0.5634797054024645 | 0.0941582901478952 | 0.3893470124551968 | F | F | F |
| 0.5641186345741858 | 0.5925506639960076 | 0.3888098595214231 | F | F | F |
| 0.1114494334935046 | 0.0701311676366885 | 0.3986376552181525 | F | F | F |
| 0.3261319662881945 | 0.1051291103740297 | 0.3988024242875312 | F | F | F |
| 0.3492093643680292 | 0.5573702775606932 | 0.3893470124551968 | F | F | F |
| 0.8488610604088223 | 0.5573745329822160 | 0.3888098595214231 | F | F | F |
| 0.8248676130051109 | 0.1057902286404513 | 0.3986376552181525 | F | F | F |
| 0.3383792532104977 | 0.8302004322606820 | 0.3937513645347082 | F | F | F |
| 0.8367796411124147 | 0.3315350310755605 | 0.3937513645347082 | F | F | F |
| 0.7420985760889067 | 0.4866741287148670 | 0.3303952583554732 | F | F | F |
| 0.3376277839809418 | 0.3314195471817456 | 0.3942364325472383 | F | F | F |
| 0.8376409987888778 | 0.8299810709125808 | 0.3937513645347082 | F | F | F |
| 0.7669331724767622 | 0.0136128670406646 | 0.5254465388450053 | T | T | T |
| 0.9106979334407724 | 0.6512029661990544 | 0.4649539381622292 | T | T | T |
| 0.4302774006285772 | 0.6772062453514580 | 0.4562871446508456 | T | T | T |
| 0.2407015489036483 | 0.9793501066049547 | 0.5298189675897481 | T | T | T |
| 0.9358533207791387 | 0.1744395981523233 | 0.4561952677674652 | T | T | T |
| 0.4076939972090194 | 0.1533052457880531 | 0.4661805890838339 | T | T | T |
| 0.2673918374511139 | 0.5150546191144514 | 0.5224768678758777 | T | T | T |
| 0.2290966091351326 | 0.7584463227070515 | 0.5259412757481969 | T | T | T |
| 0.4454700334486862 | 0.9044936221837675 | 0.4653763120722116 | T | T | T |
| 0.9027605273417189 | 0.4235458351832079 | 0.4578166082521297 | T | T | T |
| 0.7911124380274690 | 0.2281840883010079 | 0.5291907096856181 | T | T | T |
| 0.8984021731082728 | 0.9264458639509043 | 0.4571628446646063 | T | T | T |
| 0.4457040584851170 | 0.4001646753336314 | 0.4661866503787621 | T | T | T |
| 0.2287130052216207 | 0.2584092775402224 | 0.5218362227627330 | T | T | T |
| 0.0222684053809893 | 0.2226629334659839 | 0.5255374737246147 | T | T | T |
| 0.6585266696178567 | 0.4381967208585850 | 0.4659739315632097 | T | T | T |
| 0.6841373489585338 | 0.8922819263271387 | 0.4562715390861762 | T | T | T |
| 0.9918590128795836 | 0.7702146789379474 | 0.5361909963374473 | T | T | T |
| 0.1827186530579956 | 0.8889479432338262 | 0.4561746523467527 | T | T | T |
| 0.1607627268446341 | 0.4386048580149757 | 0.4662579902539410 | T | T | T |

|                    |                    |                    |   |   |   |
|--------------------|--------------------|--------------------|---|---|---|
| 0.5183077284399227 | 0.2207497675871009 | 0.5224208447784048 | T | T | T |
| 0.6708064678065041 | 0.6648386927326106 | 0.4618243509111988 | T | T | T |
| 0.0208950602097915 | 0.4993040550637890 | 0.5316142861521725 | T | T | T |
| 0.6729976462338819 | 0.1624510192588212 | 0.4611145827670182 | T | T | T |
| 0.4921793656342014 | 0.5121124682958810 | 0.5271551848702505 | T | T | T |
| 0.1709460594267046 | 0.1631673046258470 | 0.4609557155349443 | T | T | T |
| 0.5186031879855484 | 0.9928684095540479 | 0.5274719954867708 | T | T | T |
| 0.1699694936265650 | 0.6661248894698271 | 0.4614417637645392 | T | T | T |
| 0.2318915289287986 | 0.7582958518869418 | 0.3212997282865118 | F | F | F |
| 0.5035339362280098 | 0.4978031261506217 | 0.3258474991741451 | F | F | F |
| 0.2649692708826521 | 0.5089321445234489 | 0.3212997314382093 | F | F | F |
| 0.0035676858993980 | 0.9990756731962591 | 0.3258474928707500 | F | F | F |
| 0.7341495537447870 | 0.4806285960954373 | 0.5340875602868720 | T | T | T |
| 0.7788048861621618 | 0.7475075890367062 | 0.5322183382890423 | T | T | T |
| 0.4954583445476800 | 0.7700190482281825 | 0.5315573880784401 | T | T | T |
| 0.0067424784215014 | 0.9947418413469139 | 0.5307881051236085 | T | T | T |
| 0.2312494253227371 | 0.2595683989238466 | 0.3212997314382093 | F | F | F |
| 0.5142673705564675 | 0.2262095135495770 | 0.3212997314382093 | F | F | F |
| 0.8197245306682390 | 0.8569508763088862 | 0.3438201600901110 | F | F | F |
| 0.3987081608861587 | 0.9354815458449366 | 0.3117293471016254 | F | F | F |
| 0.9209922397635992 | 0.1532890848265680 | 0.3018948934479724 | F | F | F |
| 0.1730362783713417 | 0.4314418369345745 | 0.3139001625321427 | F | F | F |
| 0.3283148989230753 | 0.8129202287039874 | 0.3438201600901110 | F | F | F |
| 0.6696296955644030 | 0.3927234531479655 | 0.3117293471016254 | F | F | F |
| 0.9299447303656834 | 0.9155171710171928 | 0.3018948934479724 | F | F | F |
| 0.4004008100581657 | 0.1679411731758620 | 0.3139001625321427 | F | F | F |
| 0.8631193247769602 | 0.3221544605376110 | 0.3438201600901110 | F | F | F |
| 0.9417661356484075 | 0.6640191810841145 | 0.3117293471016254 | F | F | F |
| 0.1588437830399343 | 0.9234787908990896 | 0.3018948934479724 | F | F | F |
| 0.4368057691204541 | 0.3953728437525825 | 0.3139001625321427 | F | F | F |
| 0.1873433418511681 | 0.1386553765605854 | 0.3078748193479939 | F | F | F |
| 0.6083597115729162 | 0.0601247068673771 | 0.3399656321113582 | F | F | F |
| 0.0860756361414658 | 0.8423171707979833 | 0.3498000846394120 | F | F | F |
| 0.8340315940587928 | 0.5641644156990608 | 0.3377948166808480 | F | F | F |
| 0.6787529268564683 | 0.1826860237720780 | 0.3078748193479939 | F | F | F |
| 0.3374381297247666 | 0.6028827994856698 | 0.3399656321113582 | F | F | F |
| 0.0771230884463421 | 0.0800890850007647 | 0.3498000846394120 | F | F | F |
| 0.6066670156113929 | 0.8276650793790878 | 0.3377948166808480 | F | F | F |
| 0.1439485478357412 | 0.6734517452805591 | 0.3078748193479939 | F | F | F |
| 0.0653017366889372 | 0.3315870247342687 | 0.3399656321113582 | F | F | F |
| 0.8482240925665394 | 0.0721274080750689 | 0.3498000846394120 | F | F | F |
| 0.5702621035290605 | 0.6002333619871152 | 0.3377948166808480 | F | F | F |
| 0.5198187726736379 | 0.4710367487921232 | 0.3758420117279684 | F | F | F |
| 0.9426805682623609 | 0.3924764106726286 | 0.4077528311564294 | F | F | F |



|                    |                    |                    |   |   |   |
|--------------------|--------------------|--------------------|---|---|---|
| 0.4180544851025232 | 0.1777170637495047 | 0.4180630728800807 | F | F | F |
| 0.1697176184977991 | 0.8957742608203105 | 0.4059099647347324 | F | F | F |
| 0.0157015007558172 | 0.5134525626218860 | 0.3758420117279684 | F | F | F |
| 0.6712180398470551 | 0.9354949379856805 | 0.4077528311564294 | F | F | F |
| 0.4114658565705795 | 0.4116378360625106 | 0.4180630728800807 | F | F | F |
| 0.9398975868734993 | 0.1628324598200166 | 0.4059099647347324 | F | F | F |
| 0.4767584900125641 | 0.0098831757007858 | 0.3758420117279684 | F | F | F |
| 0.3993614858472370 | 0.6636585286003154 | 0.4077528311564294 | F | F | F |
| 0.1841461447858563 | 0.4047562752544636 | 0.4180630728800807 | F | F | F |
| 0.9035843176360459 | 0.9330345621793654 | 0.4059099647347324 | F | F | F |
| 0.1547644004390776 | 0.1916458452052581 | 0.4119880130487985 | F | F | F |
| 0.7307997352263129 | 0.2707766336215016 | 0.3797524253477320 | F | F | F |
| 0.2566607160774623 | 0.4851340867038942 | 0.3698925933407295 | F | F | F |
| 0.5066993712809946 | 0.7643982900759099 | 0.3817393573504972 | F | F | F |
| 0.6603693326687292 | 0.1487235043712474 | 0.4119880130487985 | F | F | F |
| 0.0053116273190454 | 0.7243880503595861 | 0.3797524253477320 | F | F | F |
| 0.2643070694647278 | 0.2506682497746482 | 0.3698925933407295 | F | F | F |
| 0.7342339744034376 | 0.4998948800842840 | 0.3817393573504972 | F | F | F |
| 0.1983330781461632 | 0.6537794249032487 | 0.4119880130487985 | F | F | F |
| 0.2762959286617175 | 0.9991836010246260 | 0.3797524253477320 | F | F | F |
| 0.4911154325054667 | 0.2586069723533484 | 0.3698925933407295 | F | F | F |
| 0.7714717372890760 | 0.7274977081085865 | 0.3817393573504972 | F | F | F |
| 0.8134417854784888 | 0.8600545095589420 | 0.5431440772104770 | T | T | T |
| 0.8535766673822666 | 0.8033358551562014 | 0.4433042731509805 | T | T | T |
| 0.2767077442613046 | 0.7253923329789767 | 0.4755137617730389 | T | T | T |
| 0.4063216233047163 | 0.9359773311380615 | 0.5165976076785570 | T | T | T |
| 0.7519470981499931 | 0.5108329777685446 | 0.4891852760325556 | T | T | T |
| 0.9381398873749189 | 0.1390404045848082 | 0.5038324718376078 | T | T | T |
| 0.5008104555412547 | 0.2298101182605239 | 0.4732018733101516 | T | T | T |
| 0.1880955347930548 | 0.4275731709637406 | 0.5183575469672789 | T | T | T |
| 0.3403029014902331 | 0.8119449868535200 | 0.5419114648115579 | T | T | T |
| 0.3490773557560484 | 0.8482695032422746 | 0.4434907491076971 | T | T | T |
| 0.0068496956926073 | 0.2672186886524825 | 0.4752396832251007 | T | T | T |
| 0.6616808205990662 | 0.3963931621622400 | 0.5182898405110551 | T | T | T |
| 0.7390333167078582 | 0.7483862713843692 | 0.4867563894417410 | T | T | T |
| 0.9325058568664859 | 0.9223631070468227 | 0.5057599937345958 | T | T | T |
| 0.2766204320076987 | 0.4952680699006822 | 0.4728636899361373 | T | T | T |
| 0.3975716200282191 | 0.1665475997574320 | 0.5200319609851585 | T | T | T |
| 0.8582690442275265 | 0.3263680627094194 | 0.5399104719771887 | T | T | T |
| 0.8108065278571870 | 0.3440795289718263 | 0.4445561394833505 | T | T | T |
| 0.7339917519668706 | 0.9980054555962934 | 0.4753896643110426 | T | T | T |
| 0.9343677349282431 | 0.6744599023365716 | 0.5109317052521862 | T | T | T |
| 0.5151196542169901 | 0.7409033995573833 | 0.4856397565944792 | T | T | T |
| 0.1513943669532500 | 0.9217161249980509 | 0.5040793194361414 | T | T | T |

|                    |                    |                    |   |   |   |
|--------------------|--------------------|--------------------|---|---|---|
| 0.2376256122240029 | 0.2680400074106279 | 0.4725924249367998 | T | T | T |
| 0.4414406288429899 | 0.3901280225568574 | 0.5200400486456537 | T | T | T |
| 0.4864875270131073 | 0.5233790763857789 | 0.4781803582918384 | T | T | T |
| 0.1937916452264125 | 0.1312568214242144 | 0.5098201635518764 | T | T | T |
| 0.6056860563534215 | 0.0673615027841505 | 0.5417115154527914 | T | T | T |
| 0.0673687576383481 | 0.6010915333528301 | 0.4471163114093091 | T | T | T |
| 0.0808411773915860 | 0.8484222255256624 | 0.5518142490653962 | T | T | T |
| 0.5918739323545394 | 0.8181755239411082 | 0.4377282647378657 | T | T | T |
| 0.7553768090164765 | 0.5388781857180350 | 0.5722932678063321 | T | T | T |
| 0.8403007198780902 | 0.0994084706588355 | 0.4490837916411771 | T | T | T |
| 0.9990695136665961 | 0.4798161798872144 | 0.4812596936265711 | T | T | T |
| 0.6817578778495043 | 0.1854720337083239 | 0.5101841740135106 | T | T | T |
| 0.3353795601295410 | 0.5995750753887813 | 0.5430473962298044 | T | T | T |
| 0.3378477213761035 | 0.0599323193668191 | 0.4474896533213081 | T | T | T |
| 0.0849487274740945 | 0.0688295739740970 | 0.5503850613872449 | T | T | T |
| 0.5976560331334554 | 0.5844228323544688 | 0.4383173270218856 | T | T | T |
| 0.6081810845255594 | 0.8229313617092270 | 0.5403244566432160 | T | T | T |
| 0.0672705332452917 | 0.8330496668719427 | 0.4491012049102905 | T | T | T |
| 0.5317770381846320 | 0.9903984160839508 | 0.4783468473736602 | T | T | T |
| 0.1418457953276681 | 0.6755021356776310 | 0.5103507094545634 | T | T | T |
| 0.0760456243376949 | 0.3296153083807688 | 0.5407222251332674 | T | T | T |
| 0.6103674181537684 | 0.3298556915740154 | 0.4480054071388945 | T | T | T |
| 0.8569235104293116 | 0.0759182084875592 | 0.5509069433967407 | T | T | T |
| 0.8250324035293904 | 0.5874699273877847 | 0.4387355516121008 | T | T | T |
| 0.5687741420929114 | 0.6042864918132523 | 0.5375460069727798 | T | T | T |
| 0.1072137032266599 | 0.0592890388489453 | 0.4487866680694957 | T | T | T |
| 0.8544462836546620 | 0.5910191963865061 | 0.5677372148882847 | T | T | T |
| 0.0100803701880880 | 0.6246666048106055 | 0.5769993425152229 | T | T | T |

Best + 2

In Sn O Pt

1.0000000000000000

14.6581653332033461 0.0000000000000000 0.0000000000000000  
7.3189795989957736 12.7095316657975506 0.0000000000000000  
-0.0098891034462902 -0.0168642175486257 51.7150080587397056

In Sn O Pt

56 8 96 2

Selective dynamics

Direct

|                    |                    |                    |   |   |   |
|--------------------|--------------------|--------------------|---|---|---|
| 0.7601334683925316 | 0.0111196284508281 | 0.4659634855339050 | F | F | F |
| 0.2397990222127078 | 0.9863352678444528 | 0.4737760756088107 | F | F | F |
| 0.7715588052310096 | 0.2382440998621718 | 0.4737760756088107 | F | F | F |
| 0.0114253481492099 | 0.2271244657591041 | 0.4659634855339050 | F | F | F |

|                    |                    |                    |   |   |   |
|--------------------|--------------------|--------------------|---|---|---|
| 0.9885071424342016 | 0.7703304135794511 | 0.4737760756088107 | F | F | F |
| 0.9992903736448469 | 0.4987274529686729 | 0.4698697869370179 | F | F | F |
| 0.5006083460974438 | 0.9974548753487298 | 0.4698697869370179 | F | F | F |
| 0.5711026190239110 | 0.3212438999490672 | 0.5325343176450374 | F | F | F |
| 0.0957701894278102 | 0.3438156643639090 | 0.5244126049570497 | F | F | F |
| 0.5954002788407777 | 0.8428761420777775 | 0.5239512181533499 | F | F | F |
| 0.0723457897014868 | 0.8193845017652066 | 0.5323927895013369 | F | F | F |
| 0.1070648802758711 | 0.5700070441001301 | 0.5325343176450374 | F | F | F |
| 0.5592163182809529 | 0.0952136194229070 | 0.5244126049570497 | F | F | F |
| 0.5598611324288072 | 0.5936048851403370 | 0.5239512181533499 | F | F | F |
| 0.1070842580214730 | 0.0712056639447667 | 0.5323927895013369 | F | F | F |
| 0.3217649856391844 | 0.1062039465938440 | 0.5325343176450374 | F | F | F |
| 0.3449459772301964 | 0.5584256068562183 | 0.5244126049570497 | F | F | F |
| 0.8446035586083482 | 0.5584287540679753 | 0.5239512181533499 | F | F | F |
| 0.8205024372159997 | 0.1068647249330610 | 0.5323927895013369 | F | F | F |
| 0.3340676120032526 | 0.8312648480018296 | 0.5281957169818696 | F | F | F |
| 0.8324680001261981 | 0.3325994467597084 | 0.5281957169818696 | F | F | F |
| 0.3333108283129889 | 0.3324849635476852 | 0.5286123655445181 | F | F | F |
| 0.8333293577484682 | 0.8310454865245305 | 0.5281957169818696 | F | F | F |
| 0.2283736683972180 | 0.7592107964331092 | 0.4659634855339050 | F | F | F |
| 0.4999662501356283 | 0.4987274529686729 | 0.4698697869370179 | F | F | F |
| 0.7722008935562172 | 0.7369715375365402 | 0.4737760782952236 | F | F | F |
| 0.4891830112588380 | 0.7703304059322917 | 0.4737760782952236 | F | F | F |
| 0.7384810650628779 | 0.4876078378172437 | 0.4737760782952236 | F | F | F |
| 0.7601455325951396 | 0.0085525328962147 | 0.6411928240356974 | T | T | T |
| 0.9068963005363966 | 0.6511647733352761 | 0.5893411969541400 | T | T | T |
| 0.4247044607334610 | 0.6786235862884850 | 0.5819077884714504 | T | T | T |
| 0.2316384702386010 | 0.9830843993489723 | 0.6465677959399730 | T | T | T |
| 0.9312917237377188 | 0.1743376432060558 | 0.5823480377455352 | T | T | T |
| 0.4043223002016585 | 0.1543994197478935 | 0.5905357620851116 | T | T | T |
| 0.2688467389192141 | 0.5101766842402634 | 0.6380393744878929 | T | T | T |
| 0.2254715345885040 | 0.7570072591179003 | 0.6420579666672384 | T | T | T |
| 0.4383134392657273 | 0.9058415608069116 | 0.5903423257034125 | T | T | T |
| 0.8904865381900628 | 0.4256020410274747 | 0.5848962088908607 | T | T | T |
| 0.7847799930961050 | 0.2268754841144701 | 0.6504355209587201 | T | T | T |
| 0.8924477109483996 | 0.9283709862971101 | 0.5816615776284141 | T | T | T |
| 0.4437961226831366 | 0.4003710738856687 | 0.5904228916908943 | T | T | T |
| 0.2255862444682475 | 0.2657067194084862 | 0.6387802707872693 | T | T | T |
| 0.0105509280110168 | 0.2428808988427527 | 0.6385892722445683 | T | T | T |
| 0.6530810378252062 | 0.4410022313859479 | 0.5899045841037218 | T | T | T |
| 0.6782647611618421 | 0.8950743856127712 | 0.5817848713633000 | T | T | T |
| 0.9837958320096294 | 0.7738033838252062 | 0.6445826525764117 | T | T | T |
| 0.1765820507391296 | 0.8911447405655893 | 0.5821769934215506 | T | T | T |
| 0.1581078724356105 | 0.4402360570389621 | 0.5906437289926164 | T | T | T |

|                    |                    |                    |   |   |   |
|--------------------|--------------------|--------------------|---|---|---|
| 0.5178180421026248 | 0.2182627674449353 | 0.6388673153887622 | T | T | T |
| 0.6627144699284058 | 0.6694445408202426 | 0.5846140216073660 | T | T | T |
| 0.9786063239323227 | 0.4866554027171683 | 0.6417971562092287 | T | T | T |
| 0.6704059638626091 | 0.1653468412023067 | 0.5867315773199099 | T | T | T |
| 0.5003483994955567 | 0.5065864858164988 | 0.6428737351142715 | T | T | T |
| 0.1697032218751832 | 0.1612909627794039 | 0.5860474908051502 | T | T | T |
| 0.5108675399031162 | 0.9933518438849771 | 0.6434355659177108 | T | T | T |
| 0.1679043056986317 | 0.6666313521097662 | 0.5861012573207500 | T | T | T |
| 0.2277315647397131 | 0.2604833434644362 | 0.4659634882203321 | F | F | F |
| 0.5107495099301005 | 0.2271244581119447 | 0.4659634882203321 | F | F | F |
| 0.2614514102691530 | 0.5098470890666533 | 0.4659634882203321 | F | F | F |
| 0.0000000000000000 | 0.0000000000000000 | 0.4698697815641637 | F | F | F |
| 0.7412693862374051 | 0.4891545338176010 | 0.6471127464662119 | T | T | T |
| 0.7679261638130878 | 0.7395048118468479 | 0.6459897375853277 | T | T | T |
| 0.4887769986917579 | 0.7692901848690707 | 0.6468416146219271 | T | T | T |
| 0.9984121829985158 | 0.9928587758545770 | 0.6464781126687175 | T | T | T |
| 0.8159599359379399 | 0.8579122813819282 | 0.4853073788173816 | F | F | F |
| 0.3952951534094780 | 0.9363767461815229 | 0.4577430201053687 | F | F | F |
| 0.9176869787037418 | 0.1541639962793013 | 0.4492957297685578 | F | F | F |
| 0.1695994874784077 | 0.4323415158892061 | 0.4596076389699917 | F | F | F |
| 0.3245503040634432 | 0.8138816341340984 | 0.4853073788173816 | F | F | F |
| 0.6662166882857647 | 0.3936186536121724 | 0.4577430201053687 | F | F | F |
| 0.9266394692931357 | 0.9163920824521128 | 0.4492957297685578 | F | F | F |
| 0.3969640192055408 | 0.1688408520964444 | 0.4596076389699917 | F | F | F |
| 0.8593547298765358 | 0.3231158657700490 | 0.4853073788173816 | F | F | F |
| 0.9383531281826833 | 0.6649143814923804 | 0.4577430201053687 | F | F | F |
| 0.1555385218810557 | 0.9243537025546544 | 0.4492957297685578 | F | F | F |
| 0.4333689782550181 | 0.3962725226573838 | 0.4596076389699917 | F | F | F |
| 0.1839725646666253 | 0.1395426248879019 | 0.4544321788212997 | F | F | F |
| 0.6046373471950943 | 0.0610781600883072 | 0.4819965375333126 | F | F | F |
| 0.0822455252339367 | 0.8432909133153856 | 0.4904438267021192 | F | F | F |
| 0.8303330131261575 | 0.5651133903806240 | 0.4801319186686825 | F | F | F |
| 0.6753821496046513 | 0.1835732721357388 | 0.4544321788212997 | F | F | F |
| 0.3337157653823439 | 0.6038362526576577 | 0.4819965375333126 | F | F | F |
| 0.0732929777215929 | 0.0810628271425600 | 0.4904438267021192 | F | F | F |
| 0.6029684344625679 | 0.8286140541733857 | 0.4801319186686825 | F | F | F |
| 0.1405777706676758 | 0.6743389936194006 | 0.4544321788212997 | F | F | F |
| 0.0615793723615283 | 0.3325404778970764 | 0.4819965375333126 | F | F | F |
| 0.8443939819834299 | 0.0731011501850887 | 0.4904438267021192 | F | F | F |
| 0.5665635222892007 | 0.6011823367320730 | 0.4801319186686825 | F | F | F |
| 0.5157033466994037 | 0.4720642166451867 | 0.5128125034488065 | F | F | F |
| 0.9382155266378476 | 0.3935697119943384 | 0.5402222571510507 | F | F | F |
| 0.4134764846239136 | 0.1788316355844657 | 0.5490782248169097 | F | F | F |
| 0.1652727673189958 | 0.8968637606432637 | 0.5386393295024519 | F | F | F |

|                    |                    |                    |   |   |   |
|--------------------|--------------------|--------------------|---|---|---|
| 0.0115860744760994 | 0.5144800304850392 | 0.5128125034488065 | F | F | F |
| 0.6667529985908658 | 0.9365882393736200 | 0.5402222571510507 | F | F | F |
| 0.4068878560599956 | 0.4127524079384770 | 0.5490782248169097 | F | F | F |
| 0.9354527360783820 | 0.1639219592684142 | 0.5386393295024519 | F | F | F |
| 0.4726430637634564 | 0.0109106435128155 | 0.5128125034488065 | F | F | F |
| 0.3948964446492127 | 0.6647518299181101 | 0.5402222571510507 | F | F | F |
| 0.1795681442550503 | 0.4058708471200845 | 0.5490782248169097 | F | F | F |
| 0.8991394664805483 | 0.9341240613744048 | 0.5386393295024519 | F | F | F |
| 0.1502529583315635 | 0.1927478839608767 | 0.5438600605743957 | F | F | F |
| 0.7266414664239278 | 0.2718121688495998 | 0.5161713476883989 | F | F | F |
| 0.2526104716998674 | 0.4861492806533860 | 0.5077022588577265 | F | F | F |
| 0.5025193335949325 | 0.7654379243932397 | 0.5178780203333417 | F | F | F |
| 0.6558578905342074 | 0.1498255430760409 | 0.5438600605743957 | F | F | F |
| 0.0011533585709813 | 0.7254235855908746 | 0.5161713476883989 | F | F | F |
| 0.2602568251204715 | 0.2516834436997044 | 0.5077022588577265 | F | F | F |
| 0.7300539366250547 | 0.5009345144027506 | 0.5178780203333417 | F | F | F |
| 0.1938216360732028 | 0.6548814636061238 | 0.5438600605743957 | F | F | F |
| 0.2721376599440504 | 0.0002191362025528 | 0.5161713476883989 | F | F | F |
| 0.4870651881186276 | 0.2596221662899509 | 0.5077022588577265 | F | F | F |
| 0.7672916996579389 | 0.7285373424900783 | 0.5178780203333417 | F | F | F |
| 0.8145495942780624 | 0.8459838174869967 | 0.6557897728922640 | T | T | T |
| 0.8499389996113343 | 0.8044727817123609 | 0.5711067617050974 | T | T | T |
| 0.2703722602940636 | 0.7292993666109169 | 0.5989002689137448 | T | T | T |
| 0.3989382174553023 | 0.9379237330473041 | 0.6347651142313226 | T | T | T |
| 0.7240207273021768 | 0.5294969413873176 | 0.6072413027341039 | T | T | T |
| 0.9285483669400622 | 0.1435515929650855 | 0.6240963298902715 | T | T | T |
| 0.4988171609253768 | 0.2293372687824581 | 0.5965696168982065 | T | T | T |
| 0.1763615805394729 | 0.4359438536669947 | 0.6349730411296629 | T | T | T |
| 0.3325499958038091 | 0.8135460520117157 | 0.6556073292622004 | T | T | T |
| 0.3427725686211587 | 0.8498897423287636 | 0.5710561158115659 | T | T | T |
| 0.0077402023917237 | 0.2631920782834464 | 0.5953574739128792 | T | T | T |
| 0.6696977444709510 | 0.3954974289685017 | 0.6321794322259833 | T | T | T |
| 0.7392582580849795 | 0.7486192008719506 | 0.6068250096805069 | T | T | T |
| 0.9259082226369570 | 0.9212384334976463 | 0.6227245292920779 | T | T | T |
| 0.2752251245464489 | 0.4951142745894233 | 0.5955761128438949 | T | T | T |
| 0.3936972689255499 | 0.1689138482986360 | 0.6370422026101943 | T | T | T |
| 0.8899210265150497 | 0.4033062994751641 | 0.6310417772023015 | T | T | T |
| 0.8058263173866159 | 0.3437117491510207 | 0.5716118236318809 | T | T | T |
| 0.7273765122102004 | 0.0001600454470583 | 0.5982006148937294 | T | T | T |
| 0.9349335006182519 | 0.6557083285611970 | 0.6334075414134898 | T | T | T |
| 0.5078183178216308 | 0.7438616171943008 | 0.6072545515305436 | T | T | T |
| 0.1424945656721177 | 0.9256468738739614 | 0.6240527574795571 | T | T | T |
| 0.2348744297639205 | 0.2681194398319519 | 0.5963041841905313 | T | T | T |
| 0.4433689370731267 | 0.3875001200984856 | 0.6368070042153738 | T | T | T |

|                    |                    |                    |   |   |   |
|--------------------|--------------------|--------------------|---|---|---|
| 0.4808052963241050 | 0.5258631281391022 | 0.6009995729830262 | T | T | T |
| 0.1836350972497532 | 0.1363735214328028 | 0.6295127804138702 | T | T | T |
| 0.6010702981775102 | 0.0632338022522989 | 0.6557085105922400 | T | T | T |
| 0.0631990024379240 | 0.6050290330684008 | 0.5745273547791325 | T | T | T |
| 0.0716892312243048 | 0.8401021187580533 | 0.6628708315805060 | T | T | T |
| 0.5843487174658496 | 0.8231154120264520 | 0.5659042235679186 | T | T | T |
| 0.8089952384481353 | 0.5896638585433546 | 0.6569638272645646 | T | T | T |
| 0.8364172071922608 | 0.0997572385533928 | 0.5757199936483001 | T | T | T |
| 0.9956161151720141 | 0.4802546350827612 | 0.5995973474830028 | T | T | T |
| 0.6802111700535959 | 0.1831720275715878 | 0.6295534396293736 | T | T | T |
| 0.3374303706807761 | 0.5960213240885578 | 0.6546456458784724 | T | T | T |
| 0.3346200397692058 | 0.0603077230768235 | 0.5744841921455762 | T | T | T |
| 0.0852434300476099 | 0.0407162919352604 | 0.6702503355712657 | T | T | T |
| 0.5882965094664255 | 0.5879176865927351 | 0.5653567448046876 | T | T | T |
| 0.6036107829666701 | 0.8207218346071198 | 0.6541393940259675 | T | T | T |
| 0.0627176418094361 | 0.8342692016476512 | 0.5757162448861519 | T | T | T |
| 0.5258696604187475 | 0.9906477691245374 | 0.6013255320212577 | T | T | T |
| 0.1387512550813811 | 0.6719124437152089 | 0.6281936370273614 | T | T | T |
| 0.0792608081177743 | 0.3338885782760420 | 0.6576160527617984 | T | T | T |
| 0.6059148921304381 | 0.3314425435899866 | 0.5745210845660238 | T | T | T |
| 0.8512568097417100 | 0.0603985099087646 | 0.6636750057884628 | T | T | T |
| 0.8202746546023182 | 0.5899999352520453 | 0.5662736219820053 | T | T | T |
| 0.5730590470795999 | 0.6035321521262118 | 0.6544122794087007 | T | T | T |
| 0.1035307095545456 | 0.0587176618597845 | 0.5755715005131222 | T | T | T |
| 0.9602662774795602 | 0.1884242485746683 | 0.6804782510731590 | T | T | T |
| 0.7820361762461908 | 0.3581823269749858 | 0.6863106967185525 | T | T | T |

Best + 3

In Sn O Pt

1.0000000000000000

14.6581653332033461 0.0000000000000000 0.0000000000000000

7.3189795989957736 12.7095316657975506 0.0000000000000000

-0.0098891034462902 -0.0168642175486257 37.7150080587397056

In Sn O Pt

56 8 96 2

Selective dynamics

Direct

0.7601355639032334 0.0113491388480114 0.6389314665380326 F F F

0.2398011528578508 0.9865686263342539 0.6496441292015049 F F F

0.7715609358761526 0.2384774583519729 0.6496441292015049 F F F

0.0114274436599118 0.2273539761562873 0.6389314665380326 F F F

0.9885092730793446 0.7705637720692522 0.6496441292015049 F F F

0.9992924867227941 0.4989588874152986 0.6442878065983919 F F F

|                    |                    |                    |   |   |   |
|--------------------|--------------------|--------------------|---|---|---|
| 0.5006104591753910 | 0.9976863097953554 | 0.6442878065983919 | F | F | F |
| 0.5711050139140639 | 0.3215061998213713 | 0.7302137251482463 | F | F | F |
| 0.0957725477933451 | 0.3440739638851937 | 0.7190771920085552 | F | F | F |
| 0.5954026351313857 | 0.8431342143429106 | 0.7184445361110789 | F | F | F |
| 0.0723481839551638 | 0.8196467319278042 | 0.7300196610483383 | F | F | F |
| 0.1070672751660240 | 0.5702693439724342 | 0.7302137251482463 | F | F | F |
| 0.5592186766464877 | 0.0954719189441917 | 0.7190771920085552 | F | F | F |
| 0.5598634887194152 | 0.5938629574054701 | 0.7184445361110789 | F | F | F |
| 0.1070866522751501 | 0.0714678941073643 | 0.7300196610483383 | F | F | F |
| 0.3217673805293373 | 0.1064662464661481 | 0.7302137251482463 | F | F | F |
| 0.3449483355957312 | 0.5586839063775031 | 0.7190771920085552 | F | F | F |
| 0.8446059148989562 | 0.5586868263331084 | 0.7184445361110789 | F | F | F |
| 0.8205048314696768 | 0.1071269550956586 | 0.7300196610483383 | F | F | F |
| 0.3340699873820370 | 0.8315250108956107 | 0.7242646141760360 | F | F | F |
| 0.8324703755049825 | 0.3328596096534895 | 0.7242646141760360 | F | F | F |
| 0.3333132055655028 | 0.3327453316617905 | 0.7248359247731742 | F | F | F |
| 0.8333317331272525 | 0.8313056494183115 | 0.7242646141760360 | F | F | F |
| 0.2283757639079198 | 0.7594403068302924 | 0.6389314665380326 | F | F | F |
| 0.4999683632135756 | 0.4989588874152986 | 0.6442878065983919 | F | F | F |
| 0.7722030242013673 | 0.7372048960276700 | 0.6496441328851290 | F | F | F |
| 0.4891851419039881 | 0.7705637644234216 | 0.6496441328851290 | F | F | F |
| 0.7384831957080280 | 0.4878411963083735 | 0.6496441328851290 | F | F | F |
| 0.7557518666636864 | 0.0165510988056752 | 0.8807011459980104 | T | T | T |
| 0.9058784935484246 | 0.6532184328868091 | 0.8088574500141159 | T | T | T |
| 0.4281377296087183 | 0.6770785554048266 | 0.7976383551907475 | T | T | T |
| 0.2318743051698673 | 0.9853894333118534 | 0.8865670533584501 | T | T | T |
| 0.9291799930922647 | 0.1765892621145925 | 0.7983028589448674 | T | T | T |
| 0.4014014993157923 | 0.1555795115678331 | 0.8098429546961978 | T | T | T |
| 0.2557664513863334 | 0.5154783892698861 | 0.8797421474531831 | T | T | T |
| 0.2173678764992648 | 0.7621184909420774 | 0.8721281053050335 | T | T | T |
| 0.4394430429834856 | 0.9052353526102396 | 0.8095276987920559 | T | T | T |
| 0.8962271133009754 | 0.4242803163956213 | 0.7975274674649951 | T | T | T |
| 0.7767289975939181 | 0.2392324430416308 | 0.8843469383293434 | T | T | T |
| 0.8929808530439304 | 0.9298598147107161 | 0.7990069312326402 | T | T | T |
| 0.4387419454776782 | 0.4046952092368751 | 0.8105276088109256 | T | T | T |
| 0.2196902145026795 | 0.2638795953732985 | 0.8761474637837398 | T | T | T |
| 0.0132920855373684 | 0.2257711647512362 | 0.8799509905538777 | T | T | T |
| 0.6532200383956382 | 0.4396130564448207 | 0.8086218229097369 | T | T | T |
| 0.6783726630750446 | 0.8955922713208839 | 0.7981400169737447 | T | T | T |
| 0.9791435646981892 | 0.7789821027105022 | 0.8882733804523949 | T | T | T |
| 0.1757772215478621 | 0.8936383930109910 | 0.7974055890790793 | T | T | T |
| 0.1559547406921135 | 0.4405894354026235 | 0.8098094660936362 | T | T | T |
| 0.5083249253313586 | 0.2253369506832973 | 0.8765535902504445 | T | T | T |
| 0.6676272219216909 | 0.6661164953395035 | 0.8022357494530354 | T | T | T |

|                    |                    |                    |   |   |   |
|--------------------|--------------------|--------------------|---|---|---|
| 0.9953481469907568 | 0.4918547610103246 | 0.8819211703429565 | T | T | T |
| 0.6656947051689953 | 0.1655059666204730 | 0.8039714961276484 | T | T | T |
| 0.5009172219220490 | 0.5087150950722441 | 0.8842093346355716 | T | T | T |
| 0.1646369762270256 | 0.1666781702041630 | 0.8037894272197861 | T | T | T |
| 0.5078789232951457 | 0.9955059243432965 | 0.8832463960313262 | T | T | T |
| 0.1653404573393736 | 0.6646393346380325 | 0.8023326158729078 | T | T | T |
| 0.2277336602504292 | 0.2607128538629411 | 0.6389314702216780 | F | F | F |
| 0.5107516054408165 | 0.2273539685104495 | 0.6389314702216780 | F | F | F |
| 0.2614535057798690 | 0.5100765994651582 | 0.6389314702216780 | F | F | F |
| 0.0000021130779260 | 0.0002314344439824 | 0.6442877992311082 | F | F | F |
| 0.7471368659787176 | 0.4875108654696582 | 0.8858270633188829 | T | T | T |
| 0.7711895299172673 | 0.7374280913759734 | 0.8867481096363447 | T | T | T |
| 0.5024640937996695 | 0.7616181137546357 | 0.8872041601837320 | T | T | T |
| 0.9888912701119660 | 0.0073965989330172 | 0.8903115127418145 | T | T | T |
| 0.8159621184411563 | 0.8581513196171642 | 0.6654559099501753 | F | F | F |
| 0.3952972119514584 | 0.9366022075870006 | 0.6276595231455957 | F | F | F |
| 0.9176889992569386 | 0.1543852969704318 | 0.6160765563022039 | F | F | F |
| 0.1696015544058724 | 0.4325678957130350 | 0.6302162978772969 | F | F | F |
| 0.3245524865666596 | 0.8141206723693344 | 0.6654559099501753 | F | F | F |
| 0.6662187468277452 | 0.3938441150176502 | 0.6276595231455957 | F | F | F |
| 0.9266414898463324 | 0.9166133831432433 | 0.6160765563022039 | F | F | F |
| 0.3969660861330055 | 0.1690672319202733 | 0.6302162978772969 | F | F | F |
| 0.8593569123797522 | 0.3233549040052850 | 0.6654559099501753 | F | F | F |
| 0.9383551867246638 | 0.6651398428978581 | 0.6276595231455957 | F | F | F |
| 0.1555405424342524 | 0.9245750032457849 | 0.6160765563022039 | F | F | F |
| 0.4333710451824828 | 0.3964989024812127 | 0.6302162978772969 | F | F | F |
| 0.1839746083192395 | 0.1397664555379237 | 0.6231196809846153 | F | F | F |
| 0.6046395148089374 | 0.0613155675680872 | 0.6609160677891879 | F | F | F |
| 0.0822477308365634 | 0.8435324815089373 | 0.6724990330310092 | F | F | F |
| 0.8303351723545234 | 0.5653498794420528 | 0.6583592930574795 | F | F | F |
| 0.6753841932572655 | 0.1837971027857606 | 0.6231196809846153 | F | F | F |
| 0.3337179329961870 | 0.6040736601374377 | 0.6609160677891879 | F | F | F |
| 0.0732951833242197 | 0.0813043953361117 | 0.6724990330310092 | F | F | F |
| 0.6029705936909266 | 0.8288505432348146 | 0.6583592930574795 | F | F | F |
| 0.1405798143202901 | 0.6745628242694224 | 0.6231196809846153 | F | F | F |
| 0.0615815399753714 | 0.3327778853768564 | 0.6609160677891879 | F | F | F |
| 0.8443961875860566 | 0.0733427183786404 | 0.6724990330310092 | F | F | F |
| 0.5665656815175595 | 0.6014188257935018 | 0.6583592930574795 | F | F | F |
| 0.5157056528974664 | 0.4723168025344222 | 0.7031710746865940 | F | F | F |
| 0.9382179561018660 | 0.3938357985626055 | 0.7407554663269664 | F | F | F |
| 0.4134789539146055 | 0.1791020841611726 | 0.7528988135720383 | F | F | F |
| 0.1652751896643423 | 0.8971290675402415 | 0.7385849480023765 | F | F | F |
| 0.0115883806741621 | 0.5147326163742747 | 0.7031710746865940 | F | F | F |
| 0.6667554280548842 | 0.9368543259418871 | 0.7407554663269664 | F | F | F |



|                     |                     |                    |   |   |   |
|---------------------|---------------------|--------------------|---|---|---|
| 0.4068903253506875  | 0.4130228565151839  | 0.7528988135720383 | F | F | F |
| 0.9354551584237285  | 0.1641872661653920  | 0.7385849480023765 | F | F | F |
| 0.4726453699615192  | 0.0111632294020509  | 0.7031710746865940 | F | F | F |
| 0.3948988741132311  | 0.6650179164863772  | 0.7407554663269664 | F | F | F |
| 0.1795706135457422  | 0.4061412956967914  | 0.7528988135720383 | F | F | F |
| 0.8991418888258949  | 0.9343893682713826  | 0.7385849480023765 | F | F | F |
| 0.1502554041553523  | 0.1930157623298641  | 0.7457436406118987 | F | F | F |
| 0.7266437877272409  | 0.2720664091381622  | 0.7077767387407548 | F | F | F |
| 0.2526127549163633  | 0.4863993494907461  | 0.6961638816933373 | F | F | F |
| 0.5025216625734217  | 0.7656930053037172  | 0.7101169368244840 | F | F | F |
| 0.6558603363579962  | 0.1500934214450282  | 0.7457436406118987 | F | F | F |
| 0.0011556798742944  | 0.7256778258794370  | 0.7077767387407548 | F | F | F |
| 0.2602591083369674  | 0.2519335125370645  | 0.6961638816933373 | F | F | F |
| 0.7300562656035439  | 0.5011895953132282  | 0.7101169368244840 | F | F | F |
| 0.1938240818969916  | 0.6551493419751111  | 0.7457436406118987 | F | F | F |
| 0.2721399812473635  | 0.0004733764911151  | 0.7077767387407548 | F | F | F |
| 0.4870674713351235  | 0.2598722351273111  | 0.6961638816933373 | F | F | F |
| 0.7672940286364280  | 0.7287924234005558  | 0.7101169368244840 | F | F | F |
| 0.8086764969761415  | 0.8526857086552334  | 0.8985438847150107 | T | T | T |
| 0.8499225995524874  | 0.8058360389362013  | 0.7836912415673164 | T | T | T |
| 0.2710825119894082  | 0.7277962489763350  | 0.8178051959521579 | T | T | T |
| 0.3989848106082494  | 0.9285360653811133  | 0.8715854177104728 | T | T | T |
| 0.7494304405349975  | 0.5111501213573716  | 0.8321308213238101 | T | T | T |
| 0.9266264582979989  | 0.1470139414858167  | 0.8558150290530199 | T | T | T |
| 0.4926122357895304  | 0.2338292249213502  | 0.8183795606440393 | T | T | T |
| 0.1663873212129023  | 0.4369418080229178  | 0.8725325546852870 | T | T | T |
| 0.3648030014364669  | 0.7733113793661652  | 0.9040525410046180 | T | T | T |
| 0.3442836878820040  | 0.8490102436451336  | 0.7834497798702167 | T | T | T |
| -0.0005279510710569 | 0.2701673329827146  | 0.8208956073523570 | T | T | T |
| 0.6640236027334936  | 0.4024369693451003  | 0.8683546734233988 | T | T | T |
| 0.7397735110404166  | 0.7463581997986257  | 0.8327931797607525 | T | T | T |
| 0.9272202761331180  | 0.9267194024356722  | 0.8576932299730919 | T | T | T |
| 0.2703619053001423  | 0.4963242568451047  | 0.8195929387186731 | T | T | T |
| 0.3884525126999475  | 0.1698609452297850  | 0.8736676676860975 | T | T | T |
| 0.8510218316522271  | 0.3344928076456337  | 0.9000572477040450 | T | T | T |
| 0.8054186453970963  | 0.3430764640517011  | 0.7833004847035576 | T | T | T |
| 0.7289916363262156  | -0.0000307783283987 | 0.8213915323776152 | T | T | T |
| 0.9359036936007805  | 0.6608595635888287  | 0.8689140380822002 | T | T | T |
| 0.5147135318326814  | 0.7380726173115234  | 0.8327967011864009 | T | T | T |
| 0.1412782112542306  | 0.9241586869874548  | 0.8571327375585515 | T | T | T |
| 0.2307037327740569  | 0.2713532329125982  | 0.8179496766955406 | T | T | T |
| 0.4300531280351471  | 0.3974038293727017  | 0.8743455673431576 | T | T | T |
| 0.4823433689240605  | 0.5268093744407770  | 0.8256302043678069 | T | T | T |
| 0.1854614514851551  | 0.1358883700789421  | 0.8617467543435717 | T | T | T |

|                    |                    |                    |   |   |   |
|--------------------|--------------------|--------------------|---|---|---|
| 0.5961799181096166 | 0.0694871727261443 | 0.8992386918534494 | T | T | T |
| 0.0610976037942114 | 0.6027505702065900 | 0.7870991576544193 | T | T | T |
| 0.0187054490354303 | 0.8910067261883827 | 0.9277713292108688 | T | T | T |
| 0.5858014929610695 | 0.8218210343007314 | 0.7764156893746589 | T | T | T |
| 0.8251247723035434 | 0.5719118068196277 | 0.8979826297169056 | T | T | T |
| 0.8348897885366783 | 0.1012207464232421 | 0.7899983520072729 | T | T | T |
| 0.9913069588686425 | 0.4810677109102924 | 0.8241413287343728 | T | T | T |
| 0.6713948433152118 | 0.1898440378471923 | 0.8617050496105418 | T | T | T |
| 0.2488503840259282 | 0.5816310660105131 | 0.9330995991380829 | T | T | T |
| 0.3321178037159773 | 0.0614928150038101 | 0.7882388064149681 | T | T | T |
| 0.0750231972488134 | 0.0749308898371079 | 0.9105177575121768 | T | T | T |
| 0.5925239637731351 | 0.5855492535437762 | 0.7761224758723630 | T | T | T |
| 0.6052708100501822 | 0.8199723762858346 | 0.8978126029672285 | T | T | T |
| 0.0622404172542291 | 0.8357184419316649 | 0.7899743730500046 | T | T | T |
| 0.5249200182409605 | 0.9906903884942427 | 0.8253405990048065 | T | T | T |
| 0.1323608002084324 | 0.6767517745809384 | 0.8584617180326631 | T | T | T |
| 0.0653395154338980 | 0.3318539830046650 | 0.8994659239705901 | T | T | T |
| 0.6027530295836206 | 0.3330386977898323 | 0.7883993995339299 | T | T | T |
| 0.8364779743426820 | 0.0892737312333670 | 0.9104200929251897 | T | T | T |
| 0.8219090297114163 | 0.5908531788027467 | 0.7760023189249832 | T | T | T |
| 0.5968585344633959 | 0.6006631729657261 | 0.8985959041827531 | T | T | T |
| 0.1009563667534488 | 0.0619809168781826 | 0.7898417195420299 | T | T | T |
| 0.3412581445489377 | 0.6448306544742908 | 0.9201567775328368 | T | T | T |
| 0.1335891841299106 | 0.7424048875838621 | 0.9331899492286416 | T | T | T |

**Pt- Trimer on Indium Tin Oxide ( In order of increasing energy as shown in the SI)**

Best:

In Sn O Pt

1.0000000000000000

14.6581653332033461 0.0000000000000000 0.0000000000000000

7.3189795989957736 12.7095316657975506 0.0000000000000000

-0.0098891034462902 -0.0168642175486257 51.7150080587397056

In Sn O Pt

56 8 96 3

Selective dynamics

Direct

0.7601334683925316 0.0111196284508281 0.4659634855339050 F F F

0.2397990222127078 0.9863352678444528 0.4737760756088107 F F F

0.7715588052310096 0.2382440998621718 0.4737760756088107 F F F

0.0114253481492099 0.2271244657591041 0.4659634855339050 F F F

0.9885071424342016 0.7703304135794511 0.4737760756088107 F F F

|                    |                    |                    |   |   |   |
|--------------------|--------------------|--------------------|---|---|---|
| 0.9992903736448469 | 0.4987274529686729 | 0.4698697869370179 | F | F | F |
| 0.5006083460974438 | 0.9974548753487298 | 0.4698697869370179 | F | F | F |
| 0.5711026190239110 | 0.3212438999490672 | 0.5325343176450374 | F | F | F |
| 0.0957701894278102 | 0.3438156643639090 | 0.5244126049570497 | F | F | F |
| 0.5954002788407777 | 0.8428761420777775 | 0.5239512181533499 | F | F | F |
| 0.0723457897014868 | 0.8193845017652066 | 0.5323927895013369 | F | F | F |
| 0.1070648802758711 | 0.5700070441001301 | 0.5325343176450374 | F | F | F |
| 0.5592163182809529 | 0.0952136194229070 | 0.5244126049570497 | F | F | F |
| 0.5598611324288072 | 0.5936048851403370 | 0.5239512181533499 | F | F | F |
| 0.1070842580214730 | 0.0712056639447667 | 0.5323927895013369 | F | F | F |
| 0.3217649856391844 | 0.1062039465938440 | 0.5325343176450374 | F | F | F |
| 0.3449459772301964 | 0.5584256068562183 | 0.5244126049570497 | F | F | F |
| 0.8446035586083482 | 0.5584287540679753 | 0.5239512181533499 | F | F | F |
| 0.8205024372159997 | 0.1068647249330610 | 0.5323927895013369 | F | F | F |
| 0.3340676120032526 | 0.8312648480018296 | 0.5281957169818696 | F | F | F |
| 0.8324680001261981 | 0.3325994467597084 | 0.5281957169818696 | F | F | F |
| 0.3333108283129889 | 0.3324849635476852 | 0.5286123655445181 | F | F | F |
| 0.8333293577484682 | 0.8310454865245305 | 0.5281957169818696 | F | F | F |
| 0.2283736683972180 | 0.7592107964331092 | 0.4659634855339050 | F | F | F |
| 0.4999662501356283 | 0.4987274529686729 | 0.4698697869370179 | F | F | F |
| 0.7722008935562172 | 0.7369715375365402 | 0.4737760782952236 | F | F | F |
| 0.4891830112588380 | 0.7703304059322917 | 0.4737760782952236 | F | F | F |
| 0.7384810650628779 | 0.4876078378172437 | 0.4737760782952236 | F | F | F |
| 0.7604067909070450 | 0.0143343195027179 | 0.6413257160218312 | T | T | T |
| 0.9068662126506208 | 0.6513763033792087 | 0.5891496979237327 | T | T | T |
| 0.4257989583544658 | 0.6756701859750979 | 0.5827019767817110 | T | T | T |
| 0.2298962966642309 | 0.9839928019694678 | 0.6446098780834205 | T | T | T |
| 0.9286157698699801 | 0.1763440572306735 | 0.5825667427102099 | T | T | T |
| 0.4045744098126548 | 0.1557287738439006 | 0.5909809672967601 | T | T | T |
| 0.2642472596225695 | 0.5146223647747392 | 0.6378274556023978 | T | T | T |
| 0.2235579209753674 | 0.7595503634058701 | 0.6416008139084374 | T | T | T |
| 0.4403869139941515 | 0.9043403013247022 | 0.5894690961136235 | T | T | T |
| 0.8940562599071387 | 0.4248424653310607 | 0.5821465983850420 | T | T | T |
| 0.7717001291690547 | 0.2398201114674781 | 0.6496499190427547 | T | T | T |
| 0.8905979842799373 | 0.9304441686200910 | 0.5816464059345819 | T | T | T |
| 0.4421154335177832 | 0.4013634920822296 | 0.5907765883333884 | T | T | T |
| 0.2249490561747642 | 0.2630042001884076 | 0.6386349768755241 | T | T | T |
| 0.0168956533548887 | 0.2209902985200368 | 0.6406043884242334 | T | T | T |
| 0.6532477905679310 | 0.4399307213653577 | 0.5901065675932466 | T | T | T |
| 0.6791577607414484 | 0.8935082246381552 | 0.5816156792919057 | T | T | T |
| 0.9822012161745073 | 0.7816933790736729 | 0.6447199245448448 | T | T | T |
| 0.1761238395052694 | 0.8914669755086052 | 0.5817820432851161 | T | T | T |
| 0.1566945202186170 | 0.4407087237273205 | 0.5903332107202156 | T | T | T |
| 0.5169485920939531 | 0.2234779524583046 | 0.6426815660049595 | T | T | T |

|                    |                    |                    |   |   |   |
|--------------------|--------------------|--------------------|---|---|---|
| 0.6664297633092355 | 0.6646083787450269 | 0.5861717330184868 | T | T | T |
| 0.9968609012812817 | 0.4912869085883839 | 0.6425543898920367 | T | T | T |
| 0.6664552328738018 | 0.1654764837680309 | 0.5867437516447459 | T | T | T |
| 0.4997398375212888 | 0.4916437358297951 | 0.6467933361663363 | T | T | T |
| 0.1655016966332601 | 0.1661373949271871 | 0.5859556714366110 | T | T | T |
| 0.5164674391909422 | 0.9920730235611617 | 0.6423344622238862 | T | T | T |
| 0.1660857642273905 | 0.6677922036775448 | 0.5859770828136003 | T | T | T |
| 0.2277315647397131 | 0.2604833434644362 | 0.4659634882203321 | F | F | F |
| 0.5107495099301005 | 0.2271244581119447 | 0.4659634882203321 | F | F | F |
| 0.2614514102691530 | 0.5098470890666533 | 0.4659634882203321 | F | F | F |
| 0.0000000000000000 | 0.0000000000000000 | 0.4698697815641637 | F | F | F |
| 0.7466589333341146 | 0.4800587115048924 | 0.6486078490876585 | T | T | T |
| 0.7731740253969821 | 0.7367928325132620 | 0.6457249122857420 | T | T | T |
| 0.4837615362558213 | 0.7764000193293340 | 0.6473040553906692 | T | T | T |
| 0.9964203992511942 | 0.0014067962730700 | 0.6456995902295829 | T | T | T |
| 0.8159599359379399 | 0.8579122813819282 | 0.4853073788173816 | F | F | F |
| 0.3952951534094780 | 0.9363767461815229 | 0.4577430201053687 | F | F | F |
| 0.9176869787037418 | 0.1541639962793013 | 0.4492957297685578 | F | F | F |
| 0.1695994874784077 | 0.4323415158892061 | 0.4596076389699917 | F | F | F |
| 0.3245503040634432 | 0.8138816341340984 | 0.4853073788173816 | F | F | F |
| 0.6662166882857647 | 0.3936186536121724 | 0.4577430201053687 | F | F | F |
| 0.9266394692931357 | 0.9163920824521128 | 0.4492957297685578 | F | F | F |
| 0.3969640192055408 | 0.1688408520964444 | 0.4596076389699917 | F | F | F |
| 0.8593547298765358 | 0.3231158657700490 | 0.4853073788173816 | F | F | F |
| 0.9383531281826833 | 0.6649143814923804 | 0.4577430201053687 | F | F | F |
| 0.1555385218810557 | 0.9243537025546544 | 0.4492957297685578 | F | F | F |
| 0.4333689782550181 | 0.3962725226573838 | 0.4596076389699917 | F | F | F |
| 0.1839725646666253 | 0.1395426248879019 | 0.4544321788212997 | F | F | F |
| 0.6046373471950943 | 0.0610781600883072 | 0.4819965375333126 | F | F | F |
| 0.0822455252339367 | 0.8432909133153856 | 0.4904438267021192 | F | F | F |
| 0.8303330131261575 | 0.5651133903806240 | 0.4801319186686825 | F | F | F |
| 0.6753821496046513 | 0.1835732721357388 | 0.4544321788212997 | F | F | F |
| 0.3337157653823439 | 0.6038362526576577 | 0.4819965375333126 | F | F | F |
| 0.0732929777215929 | 0.0810628271425600 | 0.4904438267021192 | F | F | F |
| 0.6029684344625679 | 0.8286140541733857 | 0.4801319186686825 | F | F | F |
| 0.1405777706676758 | 0.6743389936194006 | 0.4544321788212997 | F | F | F |
| 0.0615793723615283 | 0.3325404778970764 | 0.4819965375333126 | F | F | F |
| 0.8443939819834299 | 0.0731011501850887 | 0.4904438267021192 | F | F | F |
| 0.5665635222892007 | 0.6011823367320730 | 0.4801319186686825 | F | F | F |
| 0.5157033466994037 | 0.4720642166451867 | 0.5128125034488065 | F | F | F |
| 0.9382155266378476 | 0.3935697119943384 | 0.5402222571510507 | F | F | F |
| 0.4134764846239136 | 0.1788316355844657 | 0.5490782248169097 | F | F | F |
| 0.1652727673189958 | 0.8968637606432637 | 0.5386393295024519 | F | F | F |
| 0.0115860744760994 | 0.5144800304850392 | 0.5128125034488065 | F | F | F |

|                    |                    |                    |   |   |   |
|--------------------|--------------------|--------------------|---|---|---|
| 0.6667529985908658 | 0.9365882393736200 | 0.5402222571510507 | F | F | F |
| 0.4068878560599956 | 0.4127524079384770 | 0.5490782248169097 | F | F | F |
| 0.9354527360783820 | 0.1639219592684142 | 0.5386393295024519 | F | F | F |
| 0.4726430637634564 | 0.0109106435128155 | 0.5128125034488065 | F | F | F |
| 0.3948964446492127 | 0.6647518299181101 | 0.5402222571510507 | F | F | F |
| 0.1795681442550503 | 0.4058708471200845 | 0.5490782248169097 | F | F | F |
| 0.8991394664805483 | 0.9341240613744048 | 0.5386393295024519 | F | F | F |
| 0.1502529583315635 | 0.1927478839608767 | 0.5438600605743957 | F | F | F |
| 0.7266414664239278 | 0.2718121688495998 | 0.5161713476883989 | F | F | F |
| 0.2526104716998674 | 0.4861492806533860 | 0.5077022588577265 | F | F | F |
| 0.5025193335949325 | 0.7654379243932397 | 0.5178780203333417 | F | F | F |
| 0.6558578905342074 | 0.1498255430760409 | 0.5438600605743957 | F | F | F |
| 0.0011533585709813 | 0.7254235855908746 | 0.5161713476883989 | F | F | F |
| 0.2602568251204715 | 0.2516834436997044 | 0.5077022588577265 | F | F | F |
| 0.7300539366250547 | 0.5009345144027506 | 0.5178780203333417 | F | F | F |
| 0.1938216360732028 | 0.6548814636061238 | 0.5438600605743957 | F | F | F |
| 0.2721376599440504 | 0.0002191362025528 | 0.5161713476883989 | F | F | F |
| 0.4870651881186276 | 0.2596221662899509 | 0.5077022588577265 | F | F | F |
| 0.7672916996579389 | 0.7285373424900783 | 0.5178780203333417 | F | F | F |
| 0.8163972453106429 | 0.8467131397570222 | 0.6556988168618335 | T | T | T |
| 0.8504388091862259 | 0.8038123092129711 | 0.5708485404088489 | T | T | T |
| 0.2696531547813998 | 0.7289703801295656 | 0.5983859210571162 | T | T | T |
| 0.4035009028284575 | 0.9362183556470686 | 0.6351887786322684 | T | T | T |
| 0.7506385318783755 | 0.5140043523668339 | 0.6085350612242575 | T | T | T |
| 0.9244486374127110 | 0.1457818368707194 | 0.6238151199915130 | T | T | T |
| 0.4978189260480702 | 0.2292638845453002 | 0.5976652304368236 | T | T | T |
| 0.1709355132690109 | 0.4380485208432371 | 0.6365681576081150 | T | T | T |
| 0.3221399965319212 | 0.8228618284693909 | 0.6547812726332412 | T | T | T |
| 0.3439879873398833 | 0.8484098569707273 | 0.5711301398898574 | T | T | T |
| 0.0011741088163173 | 0.2694846984446944 | 0.5980522850799607 | T | T | T |
| 0.6698813598164108 | 0.4004663627961724 | 0.6306503516006172 | T | T | T |
| 0.7428170386276798 | 0.7448036602528000 | 0.6066192179902686 | T | T | T |
| 0.9228470687256493 | 0.9282142416218141 | 0.6228903789041647 | T | T | T |
| 0.2696330337755832 | 0.4974458029582887 | 0.5953959244829417 | T | T | T |
| 0.3933178441351400 | 0.1682423528873184 | 0.6370919284224966 | T | T | T |
| 0.8621588091280907 | 0.3275619177308921 | 0.6537620604198232 | T | T | T |
| 0.8054962131199623 | 0.3441443575274576 | 0.5710446290323969 | T | T | T |
| 0.7275084461986407 | 0.9986247943042147 | 0.5979182512799842 | T | T | T |
| 0.9388727963651553 | 0.6601535539140084 | 0.6327023820508761 | T | T | T |
| 0.5103299948756193 | 0.7420193958668253 | 0.6074305228421492 | T | T | T |
| 0.1391928471940484 | 0.9265288631118277 | 0.6225196303838064 | T | T | T |
| 0.2327354769250514 | 0.2711308606233661 | 0.5963533615313419 | T | T | T |
| 0.4310274943295802 | 0.3928954847721544 | 0.6336930709802814 | T | T | T |
| 0.4822988061876340 | 0.5251488336179287 | 0.6025685464897723 | T | T | T |

|                    |                    |                    |   |   |   |
|--------------------|--------------------|--------------------|---|---|---|
| 0.1890921248352474 | 0.1345108594464703 | 0.6281491717686477 | T | T | T |
| 0.6055504087085394 | 0.0582207632870181 | 0.6544333940859323 | T | T | T |
| 0.0620938204276646 | 0.6040714687504614 | 0.5742542250793577 | T | T | T |
| 0.0695904708712738 | 0.8497097180841983 | 0.6626032682085043 | T | T | T |
| 0.5879556692998918 | 0.8179401281465284 | 0.5659175933502928 | T | T | T |
| 0.8276561915106774 | 0.5754282211455770 | 0.6546809289336367 | T | T | T |
| 0.8346881354667905 | 0.1011696431604806 | 0.5755335848830042 | T | T | T |
| 0.9934183966868193 | 0.4794699751450509 | 0.6006219642955234 | T | T | T |
| 0.6782063426098749 | 0.1843255850971099 | 0.6282433815948247 | T | T | T |
| 0.3307225420987733 | 0.6000994153299078 | 0.6548156495576536 | T | T | T |
| 0.3326651591445364 | 0.0621868046295755 | 0.5747718574957452 | T | T | T |
| 0.0769169192961438 | 0.0717446089793109 | 0.6629994062203142 | T | T | T |
| 0.5912274940759172 | 0.5861572723815086 | 0.5662070313034625 | T | T | T |
| 0.6123389718298234 | 0.8231536039445878 | 0.6527748940903256 | T | T | T |
| 0.0613228335767581 | 0.8346761606743452 | 0.5755691830777027 | T | T | T |
| 0.5255207978504554 | 0.9892253084452143 | 0.6002807275201433 | T | T | T |
| 0.1346747681917163 | 0.6764241130361026 | 0.6280368013187756 | T | T | T |
| 0.0699145354356371 | 0.3302968268088631 | 0.6545970042533253 | T | T | T |
| 0.6045266290418408 | 0.3322971143510080 | 0.5742489796426468 | T | T | T |
| 0.8507630798048126 | 0.0734819191264168 | 0.6636959390908330 | T | T | T |
| 0.8208610516910821 | 0.5899927550645712 | 0.5658976146601120 | T | T | T |
| 0.5305432769767936 | 0.2651197157397429 | 0.6823218586242135 | T | T | T |
| 0.1015378355693657 | 0.0618619766078097 | 0.5756695656193783 | T | T | T |
| 0.6967399329800383 | 0.4366175034025291 | 0.6964830895540443 | T | T | T |
| 0.6045080179770884 | 0.3399628602978553 | 0.6839802262139397 | T | T | T |
| 0.5732038048756283 | 0.6061672901331510 | 0.6725544373970003 | T | T | T |

Best + 1

In Sn O Pt

1.0000000000000000

14.6581653332033461 0.0000000000000000 0.0000000000000000

7.3189795989957736 12.7095316657975506 0.0000000000000000

-0.0098891034462902 -0.0168642175486257 51.7150080587397056

In Sn O Pt

56 8 96 3

Selective dynamics

Direct

0.7601334683925316 0.0111196284508281 0.4659634855339050 F F F

0.2397990222127078 0.9863352678444528 0.4737760756088107 F F F

0.7715588052310096 0.2382440998621718 0.4737760756088107 F F F

0.0114253481492099 0.2271244657591041 0.4659634855339050 F F F

0.9885071424342016 0.7703304135794511 0.4737760756088107 F F F

0.9992903736448469 0.4987274529686729 0.4698697869370179 F F F

|                    |                    |                    |   |   |   |
|--------------------|--------------------|--------------------|---|---|---|
| 0.5006083460974438 | 0.9974548753487298 | 0.4698697869370179 | F | F | F |
| 0.5711026190239110 | 0.3212438999490672 | 0.5325343176450374 | F | F | F |
| 0.0957701894278102 | 0.3438156643639090 | 0.5244126049570497 | F | F | F |
| 0.5954002788407777 | 0.8428761420777775 | 0.5239512181533499 | F | F | F |
| 0.0723457897014868 | 0.8193845017652066 | 0.5323927895013369 | F | F | F |
| 0.1070648802758711 | 0.5700070441001301 | 0.5325343176450374 | F | F | F |
| 0.5592163182809529 | 0.0952136194229070 | 0.5244126049570497 | F | F | F |
| 0.5598611324288072 | 0.5936048851403370 | 0.5239512181533499 | F | F | F |
| 0.1070842580214730 | 0.0712056639447667 | 0.5323927895013369 | F | F | F |
| 0.3217649856391844 | 0.1062039465938440 | 0.5325343176450374 | F | F | F |
| 0.3449459772301964 | 0.5584256068562183 | 0.5244126049570497 | F | F | F |
| 0.8446035586083482 | 0.5584287540679753 | 0.5239512181533499 | F | F | F |
| 0.8205024372159997 | 0.1068647249330610 | 0.5323927895013369 | F | F | F |
| 0.3340676120032526 | 0.8312648480018296 | 0.5281957169818696 | F | F | F |
| 0.8324680001261981 | 0.3325994467597084 | 0.5281957169818696 | F | F | F |
| 0.3333108283129889 | 0.3324849635476852 | 0.5286123655445181 | F | F | F |
| 0.8333293577484682 | 0.8310454865245305 | 0.5281957169818696 | F | F | F |
| 0.2283736683972180 | 0.7592107964331092 | 0.4659634855339050 | F | F | F |
| 0.4999662501356283 | 0.4987274529686729 | 0.4698697869370179 | F | F | F |
| 0.7722008935562172 | 0.7369715375365402 | 0.4737760782952236 | F | F | F |
| 0.4891830112588380 | 0.7703304059322917 | 0.4737760782952236 | F | F | F |
| 0.7384810650628779 | 0.4876078378172437 | 0.4737760782952236 | F | F | F |
| 0.7592661032469747 | 0.0157626325032337 | 0.6414121394692089 | T | T | T |
| 0.9073091577061960 | 0.6519925395941293 | 0.5892047323385335 | T | T | T |
| 0.4251892739211172 | 0.6764037067817367 | 0.5827014561903430 | T | T | T |
| 0.2302605243469267 | 0.9821739619835758 | 0.6464093969368064 | T | T | T |
| 0.9284823608709072 | 0.1764688277966877 | 0.5827848073262496 | T | T | T |
| 0.4040590658130435 | 0.1567970304318593 | 0.5910688975252051 | T | T | T |
| 0.2618237044984799 | 0.5160408407813905 | 0.6383101797104338 | T | T | T |
| 0.2125530288815423 | 0.7636809183823363 | 0.6413632925696743 | T | T | T |
| 0.4403886703264128 | 0.9053932951017590 | 0.5891276512367798 | T | T | T |
| 0.8956867975820801 | 0.4242421208073427 | 0.5820400455591950 | T | T | T |
| 0.7689904807825814 | 0.2416573392804880 | 0.6502763534823509 | T | T | T |
| 0.8903324242256451 | 0.9311224056696215 | 0.5816327483505700 | T | T | T |
| 0.4406430323822750 | 0.3998614892509439 | 0.5905477375324599 | T | T | T |
| 0.2235751903209552 | 0.2624811371405418 | 0.6390380075270883 | T | T | T |
| 0.0152587044563478 | 0.2221389509946585 | 0.6414858761208743 | T | T | T |
| 0.6539976211818301 | 0.4395724137397788 | 0.5891235547905852 | T | T | T |
| 0.6787710737430227 | 0.8943909839993380 | 0.5818607605986276 | T | T | T |
| 0.9788275548575307 | 0.7842209628150930 | 0.6447327885241515 | T | T | T |
| 0.1758067628611944 | 0.8922888198541385 | 0.5819914405253344 | T | T | T |
| 0.1566242184960820 | 0.4404991928374274 | 0.5904081266353080 | T | T | T |
| 0.5189088420111519 | 0.2256510917006060 | 0.6440673121046699 | T | T | T |
| 0.6691796195135419 | 0.6644226817125150 | 0.5855866839009224 | T | T | T |

|                    |                    |                    |   |   |   |
|--------------------|--------------------|--------------------|---|---|---|
| 0.9976844375464357 | 0.4911352944242790 | 0.6427445123978949 | T | T | T |
| 0.6659022312839252 | 0.1658234328874442 | 0.5867764400488873 | T | T | T |
| 0.5004187673777364 | 0.4899579600274536 | 0.6440776480476300 | T | T | T |
| 0.1653919618242552 | 0.1656422855872035 | 0.5863610994517966 | T | T | T |
| 0.5098837409812118 | 0.0003806165819475 | 0.6430788905740273 | T | T | T |
| 0.1658658534551649 | 0.6679765994414109 | 0.5858134012359919 | T | T | T |
| 0.2277315647397131 | 0.2604833434644362 | 0.4659634882203321 | F | F | F |
| 0.5107495099301005 | 0.2271244581119447 | 0.4659634882203321 | F | F | F |
| 0.2614514102691530 | 0.5098470890666533 | 0.4659634882203321 | F | F | F |
| 0.0000000000000000 | 0.0000000000000000 | 0.4698697815641637 | F | F | F |
| 0.7502285472544369 | 0.4781119659402558 | 0.6479105227301064 | T | T | T |
| 0.7779902444866242 | 0.7349826322741660 | 0.6459675387516950 | T | T | T |
| 0.5037064068134102 | 0.7804033222353104 | 0.6468319328857730 | T | T | T |
| 0.9937663253879435 | 0.0041643527247833 | 0.6462417611559113 | T | T | T |
| 0.8159599359379399 | 0.8579122813819282 | 0.4853073788173816 | F | F | F |
| 0.3952951534094780 | 0.9363767461815229 | 0.4577430201053687 | F | F | F |
| 0.9176869787037418 | 0.1541639962793013 | 0.4492957297685578 | F | F | F |
| 0.1695994874784077 | 0.4323415158892061 | 0.4596076389699917 | F | F | F |
| 0.3245503040634432 | 0.8138816341340984 | 0.4853073788173816 | F | F | F |
| 0.6662166882857647 | 0.3936186536121724 | 0.4577430201053687 | F | F | F |
| 0.9266394692931357 | 0.9163920824521128 | 0.4492957297685578 | F | F | F |
| 0.3969640192055408 | 0.1688408520964444 | 0.4596076389699917 | F | F | F |
| 0.8593547298765358 | 0.3231158657700490 | 0.4853073788173816 | F | F | F |
| 0.9383531281826833 | 0.6649143814923804 | 0.4577430201053687 | F | F | F |
| 0.1555385218810557 | 0.9243537025546544 | 0.4492957297685578 | F | F | F |
| 0.4333689782550181 | 0.3962725226573838 | 0.4596076389699917 | F | F | F |
| 0.1839725646666253 | 0.1395426248879019 | 0.4544321788212997 | F | F | F |
| 0.6046373471950943 | 0.0610781600883072 | 0.4819965375333126 | F | F | F |
| 0.0822455252339367 | 0.8432909133153856 | 0.4904438267021192 | F | F | F |
| 0.8303330131261575 | 0.5651133903806240 | 0.4801319186686825 | F | F | F |
| 0.6753821496046513 | 0.1835732721357388 | 0.4544321788212997 | F | F | F |
| 0.3337157653823439 | 0.6038362526576577 | 0.4819965375333126 | F | F | F |
| 0.0732929777215929 | 0.0810628271425600 | 0.4904438267021192 | F | F | F |
| 0.6029684344625679 | 0.8286140541733857 | 0.4801319186686825 | F | F | F |
| 0.1405777706676758 | 0.6743389936194006 | 0.4544321788212997 | F | F | F |
| 0.0615793723615283 | 0.3325404778970764 | 0.4819965375333126 | F | F | F |
| 0.8443939819834299 | 0.0731011501850887 | 0.4904438267021192 | F | F | F |
| 0.5665635222892007 | 0.6011823367320730 | 0.4801319186686825 | F | F | F |
| 0.5157033466994037 | 0.4720642166451867 | 0.5128125034488065 | F | F | F |
| 0.9382155266378476 | 0.3935697119943384 | 0.5402222571510507 | F | F | F |
| 0.4134764846239136 | 0.1788316355844657 | 0.5490782248169097 | F | F | F |
| 0.1652727673189958 | 0.8968637606432637 | 0.5386393295024519 | F | F | F |
| 0.0115860744760994 | 0.5144800304850392 | 0.5128125034488065 | F | F | F |
| 0.6667529985908658 | 0.9365882393736200 | 0.5402222571510507 | F | F | F |



|                    |                    |                    |   |   |   |
|--------------------|--------------------|--------------------|---|---|---|
| 0.4068878560599956 | 0.4127524079384770 | 0.5490782248169097 | F | F | F |
| 0.9354527360783820 | 0.1639219592684142 | 0.5386393295024519 | F | F | F |
| 0.4726430637634564 | 0.0109106435128155 | 0.5128125034488065 | F | F | F |
| 0.3948964446492127 | 0.6647518299181101 | 0.5402222571510507 | F | F | F |
| 0.1795681442550503 | 0.4058708471200845 | 0.5490782248169097 | F | F | F |
| 0.8991394664805483 | 0.9341240613744048 | 0.5386393295024519 | F | F | F |
| 0.1502529583315635 | 0.1927478839608767 | 0.5438600605743957 | F | F | F |
| 0.7266414664239278 | 0.2718121688495998 | 0.5161713476883989 | F | F | F |
| 0.2526104716998674 | 0.4861492806533860 | 0.5077022588577265 | F | F | F |
| 0.5025193335949325 | 0.7654379243932397 | 0.5178780203333417 | F | F | F |
| 0.6558578905342074 | 0.1498255430760409 | 0.5438600605743957 | F | F | F |
| 0.0011533585709813 | 0.7254235855908746 | 0.5161713476883989 | F | F | F |
| 0.2602568251204715 | 0.2516834436997044 | 0.5077022588577265 | F | F | F |
| 0.7300539366250547 | 0.5009345144027506 | 0.5178780203333417 | F | F | F |
| 0.1938216360732028 | 0.6548814636061238 | 0.5438600605743957 | F | F | F |
| 0.2721376599440504 | 0.0002191362025528 | 0.5161713476883989 | F | F | F |
| 0.4870651881186276 | 0.2596221662899509 | 0.5077022588577265 | F | F | F |
| 0.7672916996579389 | 0.7285373424900783 | 0.5178780203333417 | F | F | F |
| 0.8145366221120649 | 0.8494887285091764 | 0.6556734585645494 | T | T | T |
| 0.8500743750940661 | 0.8048274801877043 | 0.5710340094023711 | T | T | T |
| 0.2690834401214631 | 0.7298194999696171 | 0.5987352848597305 | T | T | T |
| 0.3994096156176198 | 0.9355588043954960 | 0.6361540920524110 | T | T | T |
| 0.7514147185334636 | 0.5142536849274426 | 0.6081426215283011 | T | T | T |
| 0.9236151594004158 | 0.1486260049001334 | 0.6243862478502052 | T | T | T |
| 0.4975648211271391 | 0.2297624719688127 | 0.5981668833447480 | T | T | T |
| 0.1704572760360712 | 0.4379389377313503 | 0.6366778005437275 | T | T | T |
| 0.3044957263331097 | 0.8202870402845692 | 0.6614546271598185 | T | T | T |
| 0.3451218610319770 | 0.8472945278910005 | 0.5714664713206945 | T | T | T |
| 0.0006639146250075 | 0.2695912959496780 | 0.5985431828369564 | T | T | T |
| 0.6729454854002712 | 0.3996982148123606 | 0.6292768019601243 | T | T | T |
| 0.7426552619391178 | 0.7456281402958816 | 0.6069041351316820 | T | T | T |
| 0.9221450539207524 | 0.9307923889567832 | 0.6227863625621490 | T | T | T |
| 0.2690546555545539 | 0.4984007644212756 | 0.5956457884921961 | T | T | T |
| 0.3919981345892942 | 0.1715292978682676 | 0.6377021704821236 | T | T | T |
| 0.8596939036442712 | 0.3275910298141736 | 0.6565487486383156 | T | T | T |
| 0.8063337520290831 | 0.3436791183659801 | 0.5708767146460991 | T | T | T |
| 0.7270981745352318 | 0.9993737376276326 | 0.5979674274508328 | T | T | T |
| 0.9399248020179101 | 0.6606491234194951 | 0.6326295999769602 | T | T | T |
| 0.5172167900863077 | 0.7420584893963440 | 0.6079564383260256 | T | T | T |
| 0.1406602119444886 | 0.9273252934186385 | 0.6232146220635197 | T | T | T |
| 0.2323487365395315 | 0.2707814295993997 | 0.5967240518290844 | T | T | T |
| 0.4274337002782550 | 0.3938391310432994 | 0.6338400427573736 | T | T | T |
| 0.4812234427914457 | 0.5249961210207289 | 0.6019493712740742 | T | T | T |
| 0.1885503718856931 | 0.1334455940929290 | 0.6287621875233318 | T | T | T |

|                    |                    |                    |   |   |   |
|--------------------|--------------------|--------------------|---|---|---|
| 0.6047509907560646 | 0.0601717456017807 | 0.6548624667939879 | T | T | T |
| 0.0623039535946259 | 0.6040814344102126 | 0.5742068351180748 | T | T | T |
| 0.0627028035084658 | 0.8528863246643523 | 0.6631527730310213 | T | T | T |
| 0.5877949821848000 | 0.8190286957019565 | 0.5658901183850730 | T | T | T |
| 0.8285649945192346 | 0.5735122821978421 | 0.6544170932077963 | T | T | T |
| 0.8343841872451162 | 0.1018120185569813 | 0.5756265267657342 | T | T | T |
| 0.9935167631893893 | 0.4798546010978780 | 0.6006921504264243 | T | T | T |
| 0.6779267979131466 | 0.1856749020156424 | 0.6282534748100261 | T | T | T |
| 0.3263249245071443 | 0.6055521896442250 | 0.6559604985511935 | T | T | T |
| 0.3325043857313340 | 0.0624280739841232 | 0.5747789787208708 | T | T | T |
| 0.0754926032514669 | 0.0722146383358547 | 0.6637873390801631 | T | T | T |
| 0.5904010586167274 | 0.5876656783828146 | 0.5662911117507142 | T | T | T |
| 0.6131467519295517 | 0.8260592470811453 | 0.6535302781593653 | T | T | T |
| 0.0614719138630446 | 0.8354246129943721 | 0.5757257567567512 | T | T | T |
| 0.5244101847854695 | 0.9894070306221812 | 0.6011422040055129 | T | T | T |
| 0.1320906210877471 | 0.6768312278866757 | 0.6279400019448483 | T | T | T |
| 0.0687663743403556 | 0.3306348275969714 | 0.6549346501236429 | T | T | T |
| 0.6035016552757425 | 0.3326604935269425 | 0.5741798331911949 | T | T | T |
| 0.8483858600117722 | 0.0757387067038825 | 0.6639076021371184 | T | T | T |
| 0.8223243871447872 | 0.5899882075515871 | 0.5657477786895998 | T | T | T |
| 0.5482529340205605 | 0.2609446384350643 | 0.6835280541623285 | T | T | T |
| 0.1012322698761319 | 0.0619490004775036 | 0.5757707688118388 | T | T | T |
| 0.6145564866595430 | 0.5215665821465616 | 0.6845604167524023 | T | T | T |
| 0.5963403261998594 | 0.3588846388432227 | 0.6827596254549698 | T | T | T |
| 0.4390013096427657 | 0.6762523546375037 | 0.6691273873291129 | T | T | T |

Best + 2

In Sn O Pt

1.0000000000000000

14.6581653332033461 0.0000000000000000 0.0000000000000000

7.3189795989957736 12.7095316657975506 0.0000000000000000

-0.0098891034462902 -0.0168642175486257 51.7150080587397056

In Sn O Pt

56 8 96 3

Selective dynamics

Direct

|                    |                    |                    |   |   |   |
|--------------------|--------------------|--------------------|---|---|---|
| 0.7601334683925316 | 0.0111196284508281 | 0.4659634855339050 | F | F | F |
| 0.2397990222127078 | 0.9863352678444528 | 0.4737760756088107 | F | F | F |
| 0.7715588052310096 | 0.2382440998621718 | 0.4737760756088107 | F | F | F |
| 0.0114253481492099 | 0.2271244657591041 | 0.4659634855339050 | F | F | F |
| 0.9885071424342016 | 0.7703304135794511 | 0.4737760756088107 | F | F | F |
| 0.9992903736448469 | 0.4987274529686729 | 0.4698697869370179 | F | F | F |
| 0.5006083460974438 | 0.9974548753487298 | 0.4698697869370179 | F | F | F |

|                    |                    |                    |   |   |   |
|--------------------|--------------------|--------------------|---|---|---|
| 0.5711026190239110 | 0.3212438999490672 | 0.5325343176450374 | F | F | F |
| 0.0957701894278102 | 0.3438156643639090 | 0.5244126049570497 | F | F | F |
| 0.5954002788407777 | 0.8428761420777775 | 0.5239512181533499 | F | F | F |
| 0.0723457897014868 | 0.8193845017652066 | 0.5323927895013369 | F | F | F |
| 0.1070648802758711 | 0.5700070441001301 | 0.5325343176450374 | F | F | F |
| 0.5592163182809529 | 0.0952136194229070 | 0.5244126049570497 | F | F | F |
| 0.5598611324288072 | 0.5936048851403370 | 0.5239512181533499 | F | F | F |
| 0.1070842580214730 | 0.0712056639447667 | 0.5323927895013369 | F | F | F |
| 0.3217649856391844 | 0.1062039465938440 | 0.5325343176450374 | F | F | F |
| 0.3449459772301964 | 0.5584256068562183 | 0.5244126049570497 | F | F | F |
| 0.8446035586083482 | 0.5584287540679753 | 0.5239512181533499 | F | F | F |
| 0.8205024372159997 | 0.1068647249330610 | 0.5323927895013369 | F | F | F |
| 0.3340676120032526 | 0.8312648480018296 | 0.5281957169818696 | F | F | F |
| 0.8324680001261981 | 0.3325994467597084 | 0.5281957169818696 | F | F | F |
| 0.3333108283129889 | 0.3324849635476852 | 0.5286123655445181 | F | F | F |
| 0.8333293577484682 | 0.8310454865245305 | 0.5281957169818696 | F | F | F |
| 0.2283736683972180 | 0.7592107964331092 | 0.4659634855339050 | F | F | F |
| 0.4999662501356283 | 0.4987274529686729 | 0.4698697869370179 | F | F | F |
| 0.7722008935562172 | 0.7369715375365402 | 0.4737760782952236 | F | F | F |
| 0.4891830112588380 | 0.7703304059322917 | 0.4737760782952236 | F | F | F |
| 0.7384810650628779 | 0.4876078378172437 | 0.4737760782952236 | F | F | F |
| 0.7601091614056088 | 0.0121638659646308 | 0.6417704910713127 | T | T | T |
| 0.9074926979235514 | 0.6516963567650933 | 0.5893112330941861 | T | T | T |
| 0.4250162997550504 | 0.6768622981258829 | 0.5826148919984604 | T | T | T |
| 0.2325225376287534 | 0.9827378924692809 | 0.6450917169540631 | T | T | T |
| 0.9294743235793490 | 0.1757445216478430 | 0.5827010779196797 | T | T | T |
| 0.4035216480606607 | 0.1544335242058423 | 0.5906373273519918 | T | T | T |
| 0.2633327665681264 | 0.5138384321235492 | 0.6383312791842428 | T | T | T |
| 0.2256013205076783 | 0.7582875429276896 | 0.6415908020549921 | T | T | T |
| 0.4402045441844393 | 0.9038470091854549 | 0.5903197504685807 | T | T | T |
| 0.8956005849812954 | 0.4243831177974684 | 0.5820141358316278 | T | T | T |
| 0.7704911046975056 | 0.2567564848458090 | 0.6453859477843906 | T | T | T |
| 0.8921769480808734 | 0.9293744031025355 | 0.5818810168049353 | T | T | T |
| 0.4423830793269019 | 0.4014322403236790 | 0.5905495159148941 | T | T | T |
| 0.2251334326188754 | 0.2621121062471872 | 0.6391132208372241 | T | T | T |
| 0.0154444583137376 | 0.2247326775610929 | 0.6417386070646955 | T | T | T |
| 0.6516580990705947 | 0.4423448624712876 | 0.5890354588354683 | T | T | T |
| 0.6789567174418849 | 0.8942992172031978 | 0.5816466618737337 | T | T | T |
| 0.9832146272798070 | 0.7824564780649652 | 0.6450251322100868 | T | T | T |
| 0.1761572689509663 | 0.8915893889559143 | 0.5819585823413504 | T | T | T |
| 0.1569830863387196 | 0.4395940203202997 | 0.5904281132615097 | T | T | T |
| 0.5191232564905874 | 0.2185812245879717 | 0.6392171916797196 | T | T | T |
| 0.6662872707069738 | 0.6669673076648550 | 0.5853899362804711 | T | T | T |
| 0.9980001913628911 | 0.4923000348419038 | 0.6430433513293607 | T | T | T |

|                    |                    |                    |   |   |   |
|--------------------|--------------------|--------------------|---|---|---|
| 0.6688640635555885 | 0.1639468858760580 | 0.5862988284275019 | T | T | T |
| 0.4983498167158942 | 0.4919769293226608 | 0.6463334105459140 | T | T | T |
| 0.1654526349579157 | 0.1654667432781736 | 0.5862280148607084 | T | T | T |
| 0.5157150137505937 | 0.9922883783580190 | 0.6429763113340172 | T | T | T |
| 0.1671775383843510 | 0.6666572626815608 | 0.5860565046272228 | T | T | T |
| 0.2277315647397131 | 0.2604833434644362 | 0.4659634882203321 | F | F | F |
| 0.5107495099301005 | 0.2271244581119447 | 0.4659634882203321 | F | F | F |
| 0.2614514102691530 | 0.5098470890666533 | 0.4659634882203321 | F | F | F |
| 0.0000000000000000 | 0.0000000000000000 | 0.4698697815641637 | F | F | F |
| 0.7428590211542740 | 0.4964236055426241 | 0.6466944703843964 | T | T | T |
| 0.7730014867250929 | 0.7397200888223026 | 0.6455742984605735 | T | T | T |
| 0.4890554216238954 | 0.7694841026494146 | 0.6481556384874594 | T | T | T |
| 0.9994828113937757 | 0.9988354508328072 | 0.6469321064716738 | T | T | T |
| 0.8159599359379399 | 0.8579122813819282 | 0.4853073788173816 | F | F | F |
| 0.3952951534094780 | 0.9363767461815229 | 0.4577430201053687 | F | F | F |
| 0.9176869787037418 | 0.1541639962793013 | 0.4492957297685578 | F | F | F |
| 0.1695994874784077 | 0.4323415158892061 | 0.4596076389699917 | F | F | F |
| 0.3245503040634432 | 0.8138816341340984 | 0.4853073788173816 | F | F | F |
| 0.6662166882857647 | 0.3936186536121724 | 0.4577430201053687 | F | F | F |
| 0.9266394692931357 | 0.9163920824521128 | 0.4492957297685578 | F | F | F |
| 0.3969640192055408 | 0.1688408520964444 | 0.4596076389699917 | F | F | F |
| 0.8593547298765358 | 0.3231158657700490 | 0.4853073788173816 | F | F | F |
| 0.9383531281826833 | 0.6649143814923804 | 0.4577430201053687 | F | F | F |
| 0.1555385218810557 | 0.9243537025546544 | 0.4492957297685578 | F | F | F |
| 0.4333689782550181 | 0.3962725226573838 | 0.4596076389699917 | F | F | F |
| 0.1839725646666253 | 0.1395426248879019 | 0.4544321788212997 | F | F | F |
| 0.6046373471950943 | 0.0610781600883072 | 0.4819965375333126 | F | F | F |
| 0.0822455252339367 | 0.8432909133153856 | 0.4904438267021192 | F | F | F |
| 0.8303330131261575 | 0.5651133903806240 | 0.4801319186686825 | F | F | F |
| 0.6753821496046513 | 0.1835732721357388 | 0.4544321788212997 | F | F | F |
| 0.3337157653823439 | 0.6038362526576577 | 0.4819965375333126 | F | F | F |
| 0.0732929777215929 | 0.0810628271425600 | 0.4904438267021192 | F | F | F |
| 0.6029684344625679 | 0.8286140541733857 | 0.4801319186686825 | F | F | F |
| 0.1405777706676758 | 0.6743389936194006 | 0.4544321788212997 | F | F | F |
| 0.0615793723615283 | 0.3325404778970764 | 0.4819965375333126 | F | F | F |
| 0.8443939819834299 | 0.0731011501850887 | 0.4904438267021192 | F | F | F |
| 0.5665635222892007 | 0.6011823367320730 | 0.4801319186686825 | F | F | F |
| 0.5157033466994037 | 0.4720642166451867 | 0.5128125034488065 | F | F | F |
| 0.9382155266378476 | 0.3935697119943384 | 0.5402222571510507 | F | F | F |
| 0.4134764846239136 | 0.1788316355844657 | 0.5490782248169097 | F | F | F |
| 0.1652727673189958 | 0.8968637606432637 | 0.5386393295024519 | F | F | F |
| 0.0115860744760994 | 0.5144800304850392 | 0.5128125034488065 | F | F | F |
| 0.6667529985908658 | 0.9365882393736200 | 0.5402222571510507 | F | F | F |
| 0.4068878560599956 | 0.4127524079384770 | 0.5490782248169097 | F | F | F |

|                    |                    |                    |   |   |   |
|--------------------|--------------------|--------------------|---|---|---|
| 0.9354527360783820 | 0.1639219592684142 | 0.5386393295024519 | F | F | F |
| 0.4726430637634564 | 0.0109106435128155 | 0.5128125034488065 | F | F | F |
| 0.3948964446492127 | 0.6647518299181101 | 0.5402222571510507 | F | F | F |
| 0.1795681442550503 | 0.4058708471200845 | 0.5490782248169097 | F | F | F |
| 0.8991394664805483 | 0.9341240613744048 | 0.5386393295024519 | F | F | F |
| 0.1502529583315635 | 0.1927478839608767 | 0.5438600605743957 | F | F | F |
| 0.7266414664239278 | 0.2718121688495998 | 0.5161713476883989 | F | F | F |
| 0.2526104716998674 | 0.4861492806533860 | 0.5077022588577265 | F | F | F |
| 0.5025193335949325 | 0.7654379243932397 | 0.5178780203333417 | F | F | F |
| 0.6558578905342074 | 0.1498255430760409 | 0.5438600605743957 | F | F | F |
| 0.0011533585709813 | 0.7254235855908746 | 0.5161713476883989 | F | F | F |
| 0.2602568251204715 | 0.2516834436997044 | 0.5077022588577265 | F | F | F |
| 0.7300539366250547 | 0.5009345144027506 | 0.5178780203333417 | F | F | F |
| 0.1938216360732028 | 0.6548814636061238 | 0.5438600605743957 | F | F | F |
| 0.2721376599440504 | 0.0002191362025528 | 0.5161713476883989 | F | F | F |
| 0.4870651881186276 | 0.2596221662899509 | 0.5077022588577265 | F | F | F |
| 0.7672916996579389 | 0.7285373424900783 | 0.5178780203333417 | F | F | F |
| 0.8156825349758066 | 0.8484482800085829 | 0.6558354018492523 | T | T | T |
| 0.8502996727197853 | 0.8048097750389331 | 0.5710665946203548 | T | T | T |
| 0.2697654541209502 | 0.7291678808825566 | 0.5985810614751088 | T | T | T |
| 0.4060480562825788 | 0.9326090082473115 | 0.6356777909136611 | T | T | T |
| 0.7489472345443531 | 0.5173130326900903 | 0.6070925339679007 | T | T | T |
| 0.9215078903521885 | 0.1472864966848633 | 0.6254787042438466 | T | T | T |
| 0.4983482485236621 | 0.2290035081441388 | 0.5967035130065170 | T | T | T |
| 0.1714970092185695 | 0.4370132576674806 | 0.6367301242806249 | T | T | T |
| 0.3256510558487591 | 0.8197649931058990 | 0.6550347397687872 | T | T | T |
| 0.3441384201971402 | 0.8485079686520720 | 0.5712708213435533 | T | T | T |
| 0.0002598277324708 | 0.2682722865352929 | 0.5986962784880063 | T | T | T |
| 0.6634221088020738 | 0.4096952880978506 | 0.6300028015278514 | T | T | T |
| 0.7420737832700652 | 0.7460834741931848 | 0.6065464657449766 | T | T | T |
| 0.9236572539319852 | 0.9316629293121252 | 0.6234273961956021 | T | T | T |
| 0.2724078406791577 | 0.4946633601218480 | 0.5960422145285378 | T | T | T |
| 0.3946804846495127 | 0.1676113094015150 | 0.6370160976764581 | T | T | T |
| 0.8564724809484474 | 0.3461733821568984 | 0.6522074207893596 | T | T | T |
| 0.8057539063037069 | 0.3437864399357977 | 0.5712875803637658 | T | T | T |
| 0.7286046902207488 | 0.9981654127088291 | 0.5985798901637622 | T | T | T |
| 0.9388984872150417 | 0.6622248294294764 | 0.6326147126686195 | T | T | T |
| 0.5118965044211237 | 0.7396238571576603 | 0.6079347543899090 | T | T | T |
| 0.1403906785753080 | 0.9273576682835127 | 0.6230267894835535 | T | T | T |
| 0.2329192198985837 | 0.2700252280949300 | 0.5967231475077597 | T | T | T |
| 0.4362145516438432 | 0.3866585249960011 | 0.6359288123446944 | T | T | T |
| 0.4799448714548475 | 0.5251755857816960 | 0.6024622869839718 | T | T | T |
| 0.1887161990045314 | 0.1341967341633961 | 0.6286321088943581 | T | T | T |
| 0.6022334751631888 | 0.0646038950392693 | 0.6558733004780919 | T | T | T |

|                    |                    |                    |   |   |   |
|--------------------|--------------------|--------------------|---|---|---|
| 0.0633820702001984 | 0.6030187991138121 | 0.5744681646124974 | T | T | T |
| 0.0738276682430055 | 0.8470710161821415 | 0.6631009687306886 | T | T | T |
| 0.5859055311929424 | 0.8204429769902504 | 0.5660473823872110 | T | T | T |
| 0.8269861346064573 | 0.5799793752723374 | 0.6545407829873326 | T | T | T |
| 0.8362159759698713 | 0.1004309290965892 | 0.5757757474912424 | T | T | T |
| 0.9931409103760203 | 0.4794649607272845 | 0.6009757604898169 | T | T | T |
| 0.6828427488281008 | 0.1821909254251963 | 0.6281934192292908 | T | T | T |
| 0.3317954949440676 | 0.5977365876049561 | 0.6549080346433840 | T | T | T |
| 0.3328563973480527 | 0.0607395792492511 | 0.5748794892480547 | T | T | T |
| 0.0766782307510212 | 0.0727862142558990 | 0.6635218573318511 | T | T | T |
| 0.5901410904630708 | 0.5878409043782753 | 0.5660649215216225 | T | T | T |
| 0.6122138281945126 | 0.8241783128325508 | 0.6533704282379844 | T | T | T |
| 0.0618808957887182 | 0.8343440980852108 | 0.5757938516473970 | T | T | T |
| 0.5262159090962797 | 0.9898130343701581 | 0.6009111208552369 | T | T | T |
| 0.1356706787415334 | 0.6761261035947399 | 0.6280615231217581 | T | T | T |
| 0.0703195282091613 | 0.3305890236097042 | 0.6553081289450304 | T | T | T |
| 0.6053940004858021 | 0.3317573812303252 | 0.5744397945904538 | T | T | T |
| 0.8611893176865308 | 0.0380250366649761 | 0.6695702688125920 | T | T | T |
| 0.8218318340802284 | 0.5906089343535044 | 0.5657665935082932 | T | T | T |
| 0.6077361168122621 | 0.4895762917662410 | 0.7027479915083319 | T | T | T |
| 0.1009096480981029 | 0.0617908874909716 | 0.5758239987062268 | T | T | T |
| 0.7737172202422613 | 0.1765933681229086 | 0.6884181077206364 | T | T | T |
| 0.6248718338997961 | 0.3605920934981981 | 0.6908444643619092 | T | T | T |
| 0.5758316004619601 | 0.5943360582341981 | 0.6749596835078719 | T | T | T |

Best + 3

1.0000000000000000

|                     |                     |                     |
|---------------------|---------------------|---------------------|
| 14.6581653332033461 | 0.0000000000000000  | 0.0000000000000000  |
| 7.3189795989957736  | 12.7095316657975506 | 0.0000000000000000  |
| -0.0098891034462902 | -0.0168642175486257 | 51.7150080587397056 |

In Sn O Pt

56 8 96 3

Selective dynamics

Direct

|                    |                    |                    |   |   |   |
|--------------------|--------------------|--------------------|---|---|---|
| 0.7601334683925316 | 0.0111196284508281 | 0.4659634855339050 | F | F | F |
| 0.2397990222127078 | 0.9863352678444528 | 0.4737760756088107 | F | F | F |
| 0.7715588052310096 | 0.2382440998621718 | 0.4737760756088107 | F | F | F |
| 0.0114253481492099 | 0.2271244657591041 | 0.4659634855339050 | F | F | F |
| 0.9885071424342016 | 0.7703304135794511 | 0.4737760756088107 | F | F | F |
| 0.9992903736448469 | 0.4987274529686729 | 0.4698697869370179 | F | F | F |
| 0.5006083460974438 | 0.9974548753487298 | 0.4698697869370179 | F | F | F |
| 0.5711026190239110 | 0.3212438999490672 | 0.5325343176450374 | F | F | F |
| 0.0957701894278102 | 0.3438156643639090 | 0.5244126049570497 | F | F | F |

|                    |                    |                    |   |   |   |
|--------------------|--------------------|--------------------|---|---|---|
| 0.5954002788407777 | 0.8428761420777775 | 0.5239512181533499 | F | F | F |
| 0.0723457897014868 | 0.8193845017652066 | 0.5323927895013369 | F | F | F |
| 0.1070648802758711 | 0.5700070441001301 | 0.5325343176450374 | F | F | F |
| 0.5592163182809529 | 0.0952136194229070 | 0.5244126049570497 | F | F | F |
| 0.5598611324288072 | 0.5936048851403370 | 0.5239512181533499 | F | F | F |
| 0.1070842580214730 | 0.0712056639447667 | 0.5323927895013369 | F | F | F |
| 0.3217649856391844 | 0.1062039465938440 | 0.5325343176450374 | F | F | F |
| 0.3449459772301964 | 0.5584256068562183 | 0.5244126049570497 | F | F | F |
| 0.8446035586083482 | 0.5584287540679753 | 0.5239512181533499 | F | F | F |
| 0.8205024372159997 | 0.1068647249330610 | 0.5323927895013369 | F | F | F |
| 0.3340676120032526 | 0.8312648480018296 | 0.5281957169818696 | F | F | F |
| 0.8324680001261981 | 0.3325994467597084 | 0.5281957169818696 | F | F | F |
| 0.3333108283129889 | 0.3324849635476852 | 0.5286123655445181 | F | F | F |
| 0.8333293577484682 | 0.8310454865245305 | 0.5281957169818696 | F | F | F |
| 0.2283736683972180 | 0.7592107964331092 | 0.4659634855339050 | F | F | F |
| 0.4999662501356283 | 0.4987274529686729 | 0.4698697869370179 | F | F | F |
| 0.7722008935562172 | 0.7369715375365402 | 0.4737760782952236 | F | F | F |
| 0.4891830112588380 | 0.7703304059322917 | 0.4737760782952236 | F | F | F |
| 0.7384810650628779 | 0.4876078378172437 | 0.4737760782952236 | F | F | F |
| 0.7595108275883931 | 0.0183837066067198 | 0.6410608798858917 | T | T | T |
| 0.9063926963652307 | 0.6524309893163363 | 0.5901607064103445 | T | T | T |
| 0.4257163604954854 | 0.6755499267189009 | 0.5823244788363127 | T | T | T |
| 0.2327059452771394 | 0.9818445125734243 | 0.6450219325028641 | T | T | T |
| 0.9309241113569868 | 0.1763900431713381 | 0.5817778859741907 | T | T | T |
| 0.4042971275922582 | 0.1533418336391534 | 0.5905080915872176 | T | T | T |
| 0.2624900129185690 | 0.5143697057031034 | 0.6381931694231184 | T | T | T |
| 0.2217645128137846 | 0.7586156603038745 | 0.6410773072822309 | T | T | T |
| 0.4402924234279126 | 0.9050309055568135 | 0.5902116236723458 | T | T | T |
| 0.8980811649872606 | 0.4244966252738394 | 0.5822978031251154 | T | T | T |
| 0.7847465602204906 | 0.2320249255184734 | 0.6450027205429478 | T | T | T |
| 0.8916496823903088 | 0.9299561607879099 | 0.5816814344924097 | T | T | T |
| 0.4416126817010522 | 0.4031390611292736 | 0.5905113757814107 | T | T | T |
| 0.2227967314658486 | 0.2613089047852313 | 0.6382173450356916 | T | T | T |
| 0.0192996958428040 | 0.2205362305604623 | 0.6411315750596387 | T | T | T |
| 0.6537257808383501 | 0.4394767630265264 | 0.5902503907213799 | T | T | T |
| 0.6766012211860613 | 0.8967471192600911 | 0.5822800033160860 | T | T | T |
| 0.9829533171944078 | 0.7839823737878930 | 0.6448335274167647 | T | T | T |
| 0.1772321888163972 | 0.8905659118307554 | 0.5817114888010764 | T | T | T |
| 0.1548617621330948 | 0.4400362377461704 | 0.5904989807041687 | T | T | T |
| 0.5153082906651534 | 0.2219208549742930 | 0.6381739258577994 | T | T | T |
| 0.6667978260141538 | 0.6657591322775716 | 0.5863763767253403 | T | T | T |
| 0.0089322010751403 | 0.4917539403671043 | 0.6466678820215890 | T | T | T |
| 0.6679798299219044 | 0.1653395440473489 | 0.5858300873429272 | T | T | T |
| 0.4930699250667772 | 0.4980183442443362 | 0.6467246288714250 | T | T | T |

|                    |                    |                    |   |   |   |
|--------------------|--------------------|--------------------|---|---|---|
| 0.1665044917473395 | 0.1645122325605968 | 0.5858491163387853 | T | T | T |
| 0.4988066163765339 | 0.0079702574405047 | 0.6466619453107967 | T | T | T |
| 0.1659022937083421 | 0.6666272270622073 | 0.5858084090811104 | T | T | T |
| 0.2277315647397131 | 0.2604833434644362 | 0.4659634882203321 | F | F | F |
| 0.5107495099301005 | 0.2271244581119447 | 0.4659634882203321 | F | F | F |
| 0.2614514102691530 | 0.5098470890666533 | 0.4659634882203321 | F | F | F |
| 0.0000000000000000 | 0.0000000000000000 | 0.4698697815641637 | F | F | F |
| 0.7489033364955802 | 0.4749926378503773 | 0.6467761624841373 | T | T | T |
| 0.7762936695480391 | 0.7474029759209415 | 0.6466570703681924 | T | T | T |
| 0.4757449070272912 | 0.7754633088601608 | 0.6467861693707562 | T | T | T |
| 0.0000288356301326 | 0.9993591866384506 | 0.6460580278343926 | T | T | T |
| 0.8159599359379399 | 0.8579122813819282 | 0.4853073788173816 | F | F | F |
| 0.3952951534094780 | 0.9363767461815229 | 0.4577430201053687 | F | F | F |
| 0.9176869787037418 | 0.1541639962793013 | 0.4492957297685578 | F | F | F |
| 0.1695994874784077 | 0.4323415158892061 | 0.4596076389699917 | F | F | F |
| 0.3245503040634432 | 0.8138816341340984 | 0.4853073788173816 | F | F | F |
| 0.6662166882857647 | 0.3936186536121724 | 0.4577430201053687 | F | F | F |
| 0.9266394692931357 | 0.9163920824521128 | 0.4492957297685578 | F | F | F |
| 0.3969640192055408 | 0.1688408520964444 | 0.4596076389699917 | F | F | F |
| 0.8593547298765358 | 0.3231158657700490 | 0.4853073788173816 | F | F | F |
| 0.9383531281826833 | 0.6649143814923804 | 0.4577430201053687 | F | F | F |
| 0.1555385218810557 | 0.9243537025546544 | 0.4492957297685578 | F | F | F |
| 0.4333689782550181 | 0.3962725226573838 | 0.4596076389699917 | F | F | F |
| 0.1839725646666253 | 0.1395426248879019 | 0.4544321788212997 | F | F | F |
| 0.6046373471950943 | 0.0610781600883072 | 0.4819965375333126 | F | F | F |
| 0.0822455252339367 | 0.8432909133153856 | 0.4904438267021192 | F | F | F |
| 0.8303330131261575 | 0.5651133903806240 | 0.4801319186686825 | F | F | F |
| 0.6753821496046513 | 0.1835732721357388 | 0.4544321788212997 | F | F | F |
| 0.3337157653823439 | 0.6038362526576577 | 0.4819965375333126 | F | F | F |
| 0.0732929777215929 | 0.0810628271425600 | 0.4904438267021192 | F | F | F |
| 0.6029684344625679 | 0.8286140541733857 | 0.4801319186686825 | F | F | F |
| 0.1405777706676758 | 0.6743389936194006 | 0.4544321788212997 | F | F | F |
| 0.0615793723615283 | 0.3325404778970764 | 0.4819965375333126 | F | F | F |
| 0.8443939819834299 | 0.0731011501850887 | 0.4904438267021192 | F | F | F |
| 0.5665635222892007 | 0.6011823367320730 | 0.4801319186686825 | F | F | F |
| 0.5157033466994037 | 0.4720642166451867 | 0.5128125034488065 | F | F | F |
| 0.9382155266378476 | 0.3935697119943384 | 0.5402222571510507 | F | F | F |
| 0.4134764846239136 | 0.1788316355844657 | 0.5490782248169097 | F | F | F |
| 0.1652727673189958 | 0.8968637606432637 | 0.5386393295024519 | F | F | F |
| 0.0115860744760994 | 0.5144800304850392 | 0.5128125034488065 | F | F | F |
| 0.6667529985908658 | 0.9365882393736200 | 0.5402222571510507 | F | F | F |
| 0.4068878560599956 | 0.4127524079384770 | 0.5490782248169097 | F | F | F |
| 0.9354527360783820 | 0.1639219592684142 | 0.5386393295024519 | F | F | F |
| 0.4726430637634564 | 0.0109106435128155 | 0.5128125034488065 | F | F | F |



|                    |                    |                    |   |   |   |
|--------------------|--------------------|--------------------|---|---|---|
| 0.3948964446492127 | 0.6647518299181101 | 0.5402222571510507 | F | F | F |
| 0.1795681442550503 | 0.4058708471200845 | 0.5490782248169097 | F | F | F |
| 0.8991394664805483 | 0.9341240613744048 | 0.5386393295024519 | F | F | F |
| 0.1502529583315635 | 0.1927478839608767 | 0.5438600605743957 | F | F | F |
| 0.7266414664239278 | 0.2718121688495998 | 0.5161713476883989 | F | F | F |
| 0.2526104716998674 | 0.4861492806533860 | 0.5077022588577265 | F | F | F |
| 0.5025193335949325 | 0.7654379243932397 | 0.5178780203333417 | F | F | F |
| 0.6558578905342074 | 0.1498255430760409 | 0.5438600605743957 | F | F | F |
| 0.0011533585709813 | 0.7254235855908746 | 0.5161713476883989 | F | F | F |
| 0.2602568251204715 | 0.2516834436997044 | 0.5077022588577265 | F | F | F |
| 0.7300539366250547 | 0.5009345144027506 | 0.5178780203333417 | F | F | F |
| 0.1938216360732028 | 0.6548814636061238 | 0.5438600605743957 | F | F | F |
| 0.2721376599440504 | 0.0002191362025528 | 0.5161713476883989 | F | F | F |
| 0.4870651881186276 | 0.2596221662899509 | 0.5077022588577265 | F | F | F |
| 0.7672916996579389 | 0.7285373424900783 | 0.5178780203333417 | F | F | F |
| 0.8168625688950470 | 0.8576981101441206 | 0.6554914544735624 | T | T | T |
| 0.8486265833434530 | 0.8048461501972852 | 0.5715068344667174 | T | T | T |
| 0.2704826061966514 | 0.7269337308169312 | 0.5983435179751666 | T | T | T |
| 0.3991652158443273 | 0.9336970119495263 | 0.6330519200249256 | T | T | T |
| 0.7513235317142843 | 0.5111286134238711 | 0.6082116729027121 | T | T | T |
| 0.9318759918357884 | 0.1429555515364953 | 0.6230527976365821 | T | T | T |
| 0.4966549691627336 | 0.2311423374947381 | 0.5959317451394384 | T | T | T |
| 0.1754661141819795 | 0.4340708816712393 | 0.6364925934343972 | T | T | T |
| 0.3249550114898625 | 0.8157835742305011 | 0.6558479812715632 | T | T | T |
| 0.3454385504980735 | 0.8473454225390427 | 0.5713481176233728 | T | T | T |
| 0.0017342802500266 | 0.2693826023729784 | 0.5983072248442198 | T | T | T |
| 0.6665169154133395 | 0.3986873089845133 | 0.6330331949975587 | T | T | T |
| 0.7373640948711753 | 0.7501165484204080 | 0.6081554965887221 | T | T | T |
| 0.9248421655791645 | 0.9312721740260343 | 0.6229526469777440 | T | T | T |
| 0.2716152004547894 | 0.4952161829746231 | 0.5959890688785379 | T | T | T |
| 0.3899122722948576 | 0.1741846881853562 | 0.6363527662507167 | T | T | T |
| 0.8588602952226978 | 0.3242373297997005 | 0.6557153664012887 | T | T | T |
| 0.8060374399292201 | 0.3442544954466342 | 0.5714898764350664 | T | T | T |
| 0.7278608748210758 | 0.0007936812130680 | 0.5982870258798627 | T | T | T |
| 0.9349912586361313 | 0.6653354676716674 | 0.6328391550380275 | T | T | T |
| 0.5117499527449141 | 0.7366699867945670 | 0.6082204516368321 | T | T | T |
| 0.1434213910124384 | 0.9243843157840956 | 0.6229436756552573 | T | T | T |
| 0.2324834602252110 | 0.2699600100339410 | 0.5959795287851364 | T | T | T |
| 0.4355112332842097 | 0.3890417732048945 | 0.6363003414832704 | T | T | T |
| 0.4839531196425497 | 0.5246732070121141 | 0.6034227474956211 | T | T | T |
| 0.1907089185095003 | 0.1313001110748075 | 0.6278071442836861 | T | T | T |
| 0.6020067869037362 | 0.0712486906593597 | 0.6544371320163478 | T | T | T |
| 0.0617443741012451 | 0.6029429115674745 | 0.5745045649591560 | T | T | T |
| 0.0716356943763898 | 0.8494045556269398 | 0.6630923302965925 | T | T | T |

|                    |                    |                    |   |   |   |
|--------------------|--------------------|--------------------|---|---|---|
| 0.5870017213843184 | 0.8199812864477707 | 0.5666762549645057 | T | T | T |
| 0.9462562989413712 | 0.5398409501233417 | 0.6841486920286926 | T | T | T |
| 0.8357467456639895 | 0.1013477257950299 | 0.5757177884667328 | T | T | T |
| 0.9914862312721269 | 0.4823614132571379 | 0.6033544420193024 | T | T | T |
| 0.6773489595471318 | 0.1899040569198576 | 0.6277359081921219 | T | T | T |
| 0.3267532015129859 | 0.6012010513750070 | 0.6544194230203146 | T | T | T |
| 0.3343657371715238 | 0.0602284579031149 | 0.5744916124639019 | T | T | T |
| 0.0785444952219763 | 0.0705196889927322 | 0.6632009515283386 | T | T | T |
| 0.5918332569051259 | 0.5862454137841837 | 0.5666103045683641 | T | T | T |
| 0.5144712562922251 | 0.9448297729586983 | 0.6840995693152436 | T | T | T |
| 0.0619069827704450 | 0.8343395043660067 | 0.5757684890312831 | T | T | T |
| 0.5255536364151965 | 0.9896243633480424 | 0.6034369269007627 | T | T | T |
| 0.1325144010502086 | 0.6761595431716501 | 0.6277503624805760 | T | T | T |
| 0.0717914131755535 | 0.3255344060621965 | 0.6543990961744299 | T | T | T |
| 0.6045897312393009 | 0.3330704811213039 | 0.5745725856133390 | T | T | T |
| 0.8502068407241765 | 0.0779263223879667 | 0.6631683659556487 | T | T | T |
| 0.8214397991465034 | 0.5905570367866844 | 0.5665914799471210 | T | T | T |
| 0.5425076378246132 | 0.5139356247794922 | 0.6839140511569894 | T | T | T |
| 0.1023523520122183 | 0.0609160496173260 | 0.5756570390896272 | T | T | T |
| 0.7981828728264375 | 0.5932629729101251 | 0.6741591939214757 | T | T | T |
| 0.5952272819909368 | 0.6094594136836520 | 0.6740968106135554 | T | T | T |
| 0.6093097560747225 | 0.7970284311171341 | 0.6741012435197078 | T | T | T |

**Pt- Monomer on 4-H<sub>2</sub>O Indium Tin Oxide ( In order of increasing energy as shown in the SI)**

Best :

In Sn O Pt H

1.0000000000000000

14.6581653332033461 0.0000000000000000 0.0000000000000000

7.3189795989957736 12.7095316657975506 0.0000000000000000

-0.0098891034462902 -0.0168642175486257 51.7150080587397056

In Sn O Pt H

56 8 100 1 8

Selective dynamics

Direct

0.7601334683925316 0.0111196284508281 0.4659634855339050 F F F

0.2397990222127078 0.9863352678444528 0.4737760756088107 F F F

0.7715588052310096 0.2382440998621718 0.4737760756088107 F F F

0.0114253481492099 0.2271244657591041 0.4659634855339050 F F F

0.9885071424342016 0.7703304135794511 0.4737760756088107 F F F

0.9992903736448469 0.4987274529686729 0.4698697869370179 F F F

0.5006083460974438 0.9974548753487298 0.4698697869370179 F F F

|                    |                    |                    |   |   |   |
|--------------------|--------------------|--------------------|---|---|---|
| 0.5711026190239110 | 0.3212438999490672 | 0.5325343176450374 | F | F | F |
| 0.0957701894278102 | 0.3438156643639090 | 0.5244126049570497 | F | F | F |
| 0.5954002788407777 | 0.8428761420777775 | 0.5239512181533499 | F | F | F |
| 0.0723457897014868 | 0.8193845017652066 | 0.5323927895013369 | F | F | F |
| 0.1070648802758711 | 0.5700070441001301 | 0.5325343176450374 | F | F | F |
| 0.5592163182809529 | 0.0952136194229070 | 0.5244126049570497 | F | F | F |
| 0.5598611324288072 | 0.5936048851403370 | 0.5239512181533499 | F | F | F |
| 0.1070842580214730 | 0.0712056639447667 | 0.5323927895013369 | F | F | F |
| 0.3217649856391844 | 0.1062039465938440 | 0.5325343176450374 | F | F | F |
| 0.3449459772301964 | 0.5584256068562183 | 0.5244126049570497 | F | F | F |
| 0.8446035586083482 | 0.5584287540679753 | 0.5239512181533499 | F | F | F |
| 0.8205024372159997 | 0.1068647249330610 | 0.5323927895013369 | F | F | F |
| 0.3340676120032526 | 0.8312648480018296 | 0.5281957169818696 | F | F | F |
| 0.8324680001261981 | 0.3325994467597084 | 0.5281957169818696 | F | F | F |
| 0.3333108283129889 | 0.3324849635476852 | 0.5286123655445181 | F | F | F |
| 0.8333293577484682 | 0.8310454865245305 | 0.5281957169818696 | F | F | F |
| 0.2283736683972180 | 0.7592107964331092 | 0.4659634855339050 | F | F | F |
| 0.4999662501356283 | 0.4987274529686729 | 0.4698697869370179 | F | F | F |
| 0.7722008935562172 | 0.7369715375365402 | 0.4737760782952236 | F | F | F |
| 0.4891830112588380 | 0.7703304059322917 | 0.4737760782952236 | F | F | F |
| 0.7384810650628779 | 0.4876078378172437 | 0.4737760782952236 | F | F | F |
| 0.7649032234369665 | 0.0025607083983826 | 0.6410507747781887 | T | T | T |
| 0.9068143041073075 | 0.6507785807897660 | 0.5892888135556283 | T | T | T |
| 0.4276118559751774 | 0.6785204339438208 | 0.5816094863077381 | T | T | T |
| 0.9282283765398277 | 0.1773785779055135 | 0.5820613268016085 | T | T | T |
| 0.4056709311100876 | 0.1530149098617854 | 0.5908168930041965 | T | T | T |
| 0.2318343869671846 | 0.7567647619711840 | 0.6384780715785644 | T | T | T |
| 0.4407457772645191 | 0.9044462118770462 | 0.5902199687352826 | T | T | T |
| 0.8950564374651701 | 0.4244476266289479 | 0.5820228140333581 | T | T | T |
| 0.7681461092571641 | 0.2513268610098664 | 0.6453085748211813 | T | T | T |
| 0.8952836825166836 | 0.9272077454434495 | 0.5822233066239555 | T | T | T |
| 0.4375819034581621 | 0.4015282106427829 | 0.5913311088282901 | T | T | T |
| 0.2254425553016372 | 0.2564127612779566 | 0.6390580517147947 | T | T | T |
| 0.0124986333488333 | 0.2270342631089033 | 0.6415422023739304 | T | T | T |
| 0.6506503526210107 | 0.4408158599038011 | 0.5894517155658019 | T | T | T |
| 0.6793796361682266 | 0.8930757581098235 | 0.5819979001268671 | T | T | T |
| 0.1775451106223701 | 0.8926240815590220 | 0.5817805847081623 | T | T | T |
| 0.1579399496721920 | 0.4379385285160202 | 0.5906236655763488 | T | T | T |
| 0.5177894426783313 | 0.2224609900998384 | 0.6409925855465060 | T | T | T |
| 0.6664186407994922 | 0.6665098394376954 | 0.5860569799951783 | T | T | T |
| 0.0009749042136640 | 0.4882405773117366 | 0.6433006329370362 | T | T | T |
| 0.6686780038121906 | 0.1633965181057749 | 0.5866957336463076 | T | T | T |
| 0.4865030670100042 | 0.5112416697660793 | 0.6424207965064822 | T | T | T |
| 0.1661197044907798 | 0.1647143520252232 | 0.5861727144895926 | T | T | T |

|                    |                    |                    |   |   |   |
|--------------------|--------------------|--------------------|---|---|---|
| 0.5054592762964319 | 0.9964062659065818 | 0.6444200031987865 | T | T | T |
| 0.1678671052495096 | 0.6658229566167498 | 0.5852536314318638 | T | T | T |
| 0.2381844422802071 | 0.9888298324776331 | 0.6492579570035153 | T | T | T |
| 0.2467707700534491 | 0.5235079149240839 | 0.6414737307803561 | T | T | T |
| 0.9954467580156086 | 0.7610834122178616 | 0.6484623410408390 | T | T | T |
| 0.2277315647397131 | 0.2604833434644362 | 0.4659634882203321 | F | F | F |
| 0.5107495099301005 | 0.2271244581119447 | 0.4659634882203321 | F | F | F |
| 0.2614514102691530 | 0.5098470890666533 | 0.4659634882203321 | F | F | F |
| 0.0000000000000000 | 0.0000000000000000 | 0.4698697815641637 | F | F | F |
| 0.7360650424396989 | 0.4965131003127193 | 0.6465459100935489 | T | T | T |
| 0.7795075901574715 | 0.7354365803020675 | 0.6468770422773010 | T | T | T |
| 0.4785243943875937 | 0.7694947065661922 | 0.6483420486783504 | T | T | T |
| 0.0011689906188182 | 0.0026747594867805 | 0.6434416403216165 | T | T | T |
| 0.8159599359379399 | 0.8579122813819282 | 0.4853073788173816 | F | F | F |
| 0.3952951534094780 | 0.9363767461815229 | 0.4577430201053687 | F | F | F |
| 0.9176869787037418 | 0.1541639962793013 | 0.4492957297685578 | F | F | F |
| 0.1695994874784077 | 0.4323415158892061 | 0.4596076389699917 | F | F | F |
| 0.3245503040634432 | 0.8138816341340984 | 0.4853073788173816 | F | F | F |
| 0.6662166882857647 | 0.3936186536121724 | 0.4577430201053687 | F | F | F |
| 0.9266394692931357 | 0.9163920824521128 | 0.4492957297685578 | F | F | F |
| 0.3969640192055408 | 0.1688408520964444 | 0.4596076389699917 | F | F | F |
| 0.8593547298765358 | 0.3231158657700490 | 0.4853073788173816 | F | F | F |
| 0.9383531281826833 | 0.6649143814923804 | 0.4577430201053687 | F | F | F |
| 0.1555385218810557 | 0.9243537025546544 | 0.4492957297685578 | F | F | F |
| 0.4333689782550181 | 0.3962725226573838 | 0.4596076389699917 | F | F | F |
| 0.1839725646666253 | 0.1395426248879019 | 0.4544321788212997 | F | F | F |
| 0.6046373471950943 | 0.0610781600883072 | 0.4819965375333126 | F | F | F |
| 0.0822455252339367 | 0.8432909133153856 | 0.4904438267021192 | F | F | F |
| 0.8303330131261575 | 0.5651133903806240 | 0.4801319186686825 | F | F | F |
| 0.6753821496046513 | 0.1835732721357388 | 0.4544321788212997 | F | F | F |
| 0.3337157653823439 | 0.6038362526576577 | 0.4819965375333126 | F | F | F |
| 0.0732929777215929 | 0.0810628271425600 | 0.4904438267021192 | F | F | F |
| 0.6029684344625679 | 0.8286140541733857 | 0.4801319186686825 | F | F | F |
| 0.1405777706676758 | 0.6743389936194006 | 0.4544321788212997 | F | F | F |
| 0.0615793723615283 | 0.3325404778970764 | 0.4819965375333126 | F | F | F |
| 0.8443939819834299 | 0.0731011501850887 | 0.4904438267021192 | F | F | F |
| 0.5665635222892007 | 0.6011823367320730 | 0.4801319186686825 | F | F | F |
| 0.5157033466994037 | 0.4720642166451867 | 0.5128125034488065 | F | F | F |
| 0.9382155266378476 | 0.3935697119943384 | 0.5402222571510507 | F | F | F |
| 0.4134764846239136 | 0.1788316355844657 | 0.5490782248169097 | F | F | F |
| 0.1652727673189958 | 0.8968637606432637 | 0.5386393295024519 | F | F | F |
| 0.0115860744760994 | 0.5144800304850392 | 0.5128125034488065 | F | F | F |
| 0.6667529985908658 | 0.9365882393736200 | 0.5402222571510507 | F | F | F |
| 0.4068878560599956 | 0.4127524079384770 | 0.5490782248169097 | F | F | F |

|                    |                    |                    |   |   |   |
|--------------------|--------------------|--------------------|---|---|---|
| 0.9354527360783820 | 0.1639219592684142 | 0.5386393295024519 | F | F | F |
| 0.4726430637634564 | 0.0109106435128155 | 0.5128125034488065 | F | F | F |
| 0.3948964446492127 | 0.6647518299181101 | 0.5402222571510507 | F | F | F |
| 0.1795681442550503 | 0.4058708471200845 | 0.5490782248169097 | F | F | F |
| 0.8991394664805483 | 0.9341240613744048 | 0.5386393295024519 | F | F | F |
| 0.1502529583315635 | 0.1927478839608767 | 0.5438600605743957 | F | F | F |
| 0.7266414664239278 | 0.2718121688495998 | 0.5161713476883989 | F | F | F |
| 0.2526104716998674 | 0.4861492806533860 | 0.5077022588577265 | F | F | F |
| 0.5025193335949325 | 0.7654379243932397 | 0.5178780203333417 | F | F | F |
| 0.6558578905342074 | 0.1498255430760409 | 0.5438600605743957 | F | F | F |
| 0.0011533585709813 | 0.7254235855908746 | 0.5161713476883989 | F | F | F |
| 0.2602568251204715 | 0.2516834436997044 | 0.5077022588577265 | F | F | F |
| 0.7300539366250547 | 0.5009345144027506 | 0.5178780203333417 | F | F | F |
| 0.1938216360732028 | 0.6548814636061238 | 0.5438600605743957 | F | F | F |
| 0.2721376599440504 | 0.0002191362025528 | 0.5161713476883989 | F | F | F |
| 0.4870651881186276 | 0.2596221662899509 | 0.5077022588577265 | F | F | F |
| 0.7672916996579389 | 0.7285373424900783 | 0.5178780203333417 | F | F | F |
| 0.8321331772694220 | 0.8438904039441750 | 0.6571098896045670 | T | T | T |
| 0.8507793673928119 | 0.8040656912280898 | 0.5710463922300836 | T | T | T |
| 0.2726544690330466 | 0.7281625016757460 | 0.5968368914932510 | T | T | T |
| 0.4026447234764778 | 0.9306855069815481 | 0.6320614956643323 | T | T | T |
| 0.7458978287128293 | 0.5132088271429286 | 0.6069973124202335 | T | T | T |
| 0.9180638663177264 | 0.1493595782372285 | 0.6243168189213150 | T | T | T |
| 0.4990147990514187 | 0.2286475227791318 | 0.5976723521708797 | T | T | T |
| 0.1727010689357501 | 0.4296726490304396 | 0.6354060815737779 | T | T | T |
| 0.3259474669142181 | 0.8144362131485765 | 0.6547625188795883 | T | T | T |
| 0.3445408007493543 | 0.8498951262635929 | 0.5709396411033325 | T | T | T |
| 0.9995163233162618 | 0.2687652175746965 | 0.5985494877727205 | T | T | T |
| 0.6545928882329701 | 0.4089469899775086 | 0.6324419964330267 | T | T | T |
| 0.7415501705739170 | 0.7466120575410961 | 0.6070921086993788 | T | T | T |
| 0.9340996828029627 | 0.9237593761096424 | 0.6244536818696450 | T | T | T |
| 0.2679928084115860 | 0.4980867094149533 | 0.5977467101039001 | T | T | T |
| 0.3946796638112826 | 0.1680379683817996 | 0.6372679643702753 | T | T | T |
| 0.8493760107475173 | 0.3400592454624329 | 0.6537121051853647 | T | T | T |
| 0.8045987873752970 | 0.3436490669936481 | 0.5711915780190662 | T | T | T |
| 0.7328380925901178 | 0.9953854277624306 | 0.5986126773222133 | T | T | T |
| 0.9363559651739278 | 0.6577127069301908 | 0.6320347713655362 | T | T | T |
| 0.5124162411173969 | 0.7374395792439312 | 0.6081403701328745 | T | T | T |
| 0.1460586566643897 | 0.9250478428802634 | 0.6236440774056586 | T | T | T |
| 0.2351609816116900 | 0.2672430413404574 | 0.5964781142440485 | T | T | T |
| 0.4327916483970174 | 0.3930900273778401 | 0.6363203830618043 | T | T | T |
| 0.4771925979002870 | 0.5268831566579107 | 0.6002627026022457 | T | T | T |
| 0.1836245348642952 | 0.1351282822866160 | 0.6279485049178409 | T | T | T |
| 0.6056542909461755 | 0.0593233422481706 | 0.6547240322897516 | T | T | T |

|                    |                    |                    |   |   |   |
|--------------------|--------------------|--------------------|---|---|---|
| 0.0627177457499293 | 0.6028354366320602 | 0.5743695136680409 | T | T | T |
| 0.0797047007219157 | 0.8493201148944890 | 0.6650216277161313 | T | T | T |
| 0.5863902027178800 | 0.8196347043465864 | 0.5661303152306687 | T | T | T |
| 0.8322209455275020 | 0.5654753925447830 | 0.6537760179794285 | T | T | T |
| 0.8362198190417821 | 0.0996862933505199 | 0.5758830667899315 | T | T | T |
| 0.9943042245684284 | 0.4774796287885708 | 0.6007887148243766 | T | T | T |
| 0.6855805967545485 | 0.1769524518352983 | 0.6291513921217372 | T | T | T |
| 0.3275556743519739 | 0.6021633584480693 | 0.6555275458162479 | T | T | T |
| 0.3338736859547615 | 0.0607510619948706 | 0.5745636454637176 | T | T | T |
| 0.0710382229592591 | 0.0736706477217439 | 0.6631939686480719 | T | T | T |
| 0.5919497032642463 | 0.5866722819520590 | 0.5658880389232629 | T | T | T |
| 0.4703973352321940 | 0.8375193235425276 | 0.6886889482148562 | T | T | T |
| 0.0633626716847342 | 0.8351197253720546 | 0.5755858610067464 | T | T | T |
| 0.5278987411691713 | 0.9897326905497287 | 0.6017683956498079 | T | T | T |
| 0.1352452133834879 | 0.6876694206445729 | 0.6260258615405669 | T | T | T |
| 0.0712109429227966 | 0.3275756400549213 | 0.6562017195513271 | T | T | T |
| 0.6031616216709333 | 0.3312239599487654 | 0.5749465044849587 | T | T | T |
| 0.8650502657261134 | 0.0447888558113807 | 0.6664882074664352 | T | T | T |
| 0.8210882243087413 | 0.5900610084347941 | 0.5659603776528606 | T | T | T |
| 0.5649884463066756 | 0.6042785634476657 | 0.6544649999739693 | T | T | T |
| 0.1000647493948705 | 0.0621964483046242 | 0.5758467053283448 | T | T | T |
| 0.1007326858014815 | 0.6125209528492815 | 0.6706076946347099 | T | T | T |
| 0.3112469633560560 | 0.0294274168429234 | 0.6798820186815562 | T | T | T |
| 0.5483745672795232 | 0.2380519336725616 | 0.6844091343817121 | T | T | T |
| 0.7261615288642315 | 0.2374566082873327 | 0.6845867413435920 | T | T | T |
| 0.6070523604476465 | 0.8145935777963953 | 0.6712151120004781 | T | T | T |
| 0.8318355452441673 | 0.1022975071087069 | 0.6794752965569248 | T | T | T |
| 0.1173231032513955 | 0.6171473230409978 | 0.6886318888074016 | T | T | T |
| 0.0872224132105914 | 0.8554598365390429 | 0.6835887312994002 | T | T | T |
| 0.2646399198354751 | 0.0627289323011849 | 0.6945566377755427 | T | T | T |
| 0.4095907908192665 | 0.9132326386008330 | 0.6874868431630070 | T | T | T |
| 0.6154784509376892 | 0.2437760058735848 | 0.6859450062667404 | T | T | T |
| 0.5735207478706984 | 0.1629171174028724 | 0.6873677366382772 | T | T | T |
| 0.7398225857971238 | 0.2812453066272232 | 0.6963052640869730 | T | T | T |

Best + 1

In Sn O H Pt

1.0000000000000000

14.6581653332033461 0.0000000000000000 0.0000000000000000

7.3189795989957736 12.7095316657975506 0.0000000000000000

-0.0098891034462902 -0.0168642175486257 37.7150080587397056

In Sn O H Pt

56 8 100 8 1

Selective dynamics

Direct

|                    |                    |                    |   |   |   |
|--------------------|--------------------|--------------------|---|---|---|
| 0.7601355639032334 | 0.0113491388480114 | 0.6389314665380326 | F | F | F |
| 0.2398011528578508 | 0.9865686263342539 | 0.6496441292015049 | F | F | F |
| 0.7715609358761526 | 0.2384774583519729 | 0.6496441292015049 | F | F | F |
| 0.0114274436599118 | 0.2273539761562873 | 0.6389314665380326 | F | F | F |
| 0.9885092730793446 | 0.7705637720692522 | 0.6496441292015049 | F | F | F |
| 0.9992924867227941 | 0.4989588874152986 | 0.6442878065983919 | F | F | F |
| 0.5006104591753910 | 0.9976863097953554 | 0.6442878065983919 | F | F | F |
| 0.5711050139140639 | 0.3215061998213713 | 0.7302137251482463 | F | F | F |
| 0.0957725477933451 | 0.3440739638851937 | 0.7190771920085552 | F | F | F |
| 0.5954026351313857 | 0.8431342143429106 | 0.7184445361110789 | F | F | F |
| 0.0723481839551638 | 0.8196467319278042 | 0.7300196610483383 | F | F | F |
| 0.1070672751660240 | 0.5702693439724342 | 0.7302137251482463 | F | F | F |
| 0.5592186766464877 | 0.0954719189441917 | 0.7190771920085552 | F | F | F |
| 0.5598634887194152 | 0.5938629574054701 | 0.7184445361110789 | F | F | F |
| 0.1070866522751501 | 0.0714678941073643 | 0.7300196610483383 | F | F | F |
| 0.3217673805293373 | 0.1064662464661481 | 0.7302137251482463 | F | F | F |
| 0.3449483355957312 | 0.5586839063775031 | 0.7190771920085552 | F | F | F |
| 0.8446059148989562 | 0.5586868263331084 | 0.7184445361110789 | F | F | F |
| 0.8205048314696768 | 0.1071269550956586 | 0.7300196610483383 | F | F | F |
| 0.3340699873820370 | 0.8315250108956107 | 0.7242646141760360 | F | F | F |
| 0.8324703755049825 | 0.3328596096534895 | 0.7242646141760360 | F | F | F |
| 0.3333132055655028 | 0.3327453316617905 | 0.7248359247731742 | F | F | F |
| 0.8333317331272525 | 0.8313056494183115 | 0.7242646141760360 | F | F | F |
| 0.2283757639079198 | 0.7594403068302924 | 0.6389314665380326 | F | F | F |
| 0.4999683632135756 | 0.4989588874152986 | 0.6442878065983919 | F | F | F |
| 0.7722030242013673 | 0.7372048960276700 | 0.6496441328851290 | F | F | F |
| 0.4891851419039881 | 0.7705637644234216 | 0.6496441328851290 | F | F | F |
| 0.7384831957080280 | 0.4878411963083735 | 0.6496441328851290 | F | F | F |
| 0.7622365911974296 | 0.0053850992726895 | 0.8800391170067945 | T | T | T |
| 0.9077230769323323 | 0.6505804820473907 | 0.8068519354989639 | T | T | T |
| 0.4247094021846239 | 0.6800275719863283 | 0.8011399183327799 | T | T | T |
| 0.9272301861312651 | 0.1779629290079505 | 0.7980917048345653 | T | T | T |
| 0.4026479701369405 | 0.1548969800692222 | 0.8102521809686198 | T | T | T |
| 0.2375295342063675 | 0.7630389693980558 | 0.8782483801249247 | T | T | T |
| 0.4408435760057881 | 0.9043730626566023 | 0.8083877368980511 | T | T | T |
| 0.8967977947351123 | 0.4263628098889672 | 0.7978083865759119 | T | T | T |
| 0.7678040745131957 | 0.2414151212926242 | 0.8898620527424806 | T | T | T |
| 0.8928023483399798 | 0.9264246653756244 | 0.7982428723532323 | T | T | T |
| 0.4412595695289438 | 0.3996914188535987 | 0.8095750446761527 | T | T | T |
| 0.2255107682544380 | 0.2502654307056104 | 0.8799404581530236 | T | T | T |
| 0.0038675377007773 | 0.2406560114963635 | 0.8770084497197845 | T | T | T |
| 0.6533190432028085 | 0.4387718479503606 | 0.8073129956974616 | T | T | T |

|                    |                    |                    |   |   |   |
|--------------------|--------------------|--------------------|---|---|---|
| 0.6787402343971335 | 0.8937499063881874 | 0.7975020310948366 | T | T | T |
| 0.1739402916753170 | 0.8946901326172466 | 0.7984130693882188 | T | T | T |
| 0.157287424777353  | 0.4353683513676745 | 0.8105227191894301 | T | T | T |
| 0.5146989286065394 | 0.2210872026576732 | 0.8776512794492743 | T | T | T |
| 0.6678139313617566 | 0.6657165965121100 | 0.8012004405745539 | T | T | T |
| 0.0049001031566596 | 0.5015552602190042 | 0.8851887178319343 | T | T | T |
| 0.6685985902989322 | 0.1631290424651285 | 0.8045156720173524 | T | T | T |
| 0.4966491888051629 | 0.5165675029167465 | 0.8795894353689939 | T | T | T |
| 0.1652671308754023 | 0.1649638990732566 | 0.8036924191191396 | T | T | T |
| 0.5098792969607558 | 0.9899668355406708 | 0.8813358251871853 | T | T | T |
| 0.1655583644191906 | 0.6668593391380687 | 0.8041458970357551 | T | T | T |
| 0.2437305824773322 | 0.0045506985859969 | 0.8955891789799858 | T | T | T |
| 0.2651474997985432 | 0.5070398856945623 | 0.8767017938935345 | T | T | T |
| 0.9898614852326009 | 0.7579919590064200 | 0.8894051235516007 | T | T | T |
| 0.2277336602504292 | 0.2607128538629411 | 0.6389314702216780 | F | F | F |
| 0.5107516054408165 | 0.2273539685104495 | 0.6389314702216780 | F | F | F |
| 0.2614535057798690 | 0.5100765994651582 | 0.6389314702216780 | F | F | F |
| 0.0000021130779260 | 0.0002314344439824 | 0.6442877992311082 | F | F | F |
| 0.7439566086844516 | 0.4895086420257281 | 0.8851646937887070 | T | T | T |
| 0.7698563753679258 | 0.7364605773680543 | 0.8846446591492254 | T | T | T |
| 0.4917095504385614 | 0.7595857864587838 | 0.8862494794434784 | T | T | T |
| 0.9908669889307267 | 0.0023677103891598 | 0.8817952272855216 | T | T | T |
| 0.8159621184411563 | 0.8581513196171642 | 0.6654559099501753 | F | F | F |
| 0.3952972119514584 | 0.9366022075870006 | 0.6276595231455957 | F | F | F |
| 0.9176889992569386 | 0.1543852969704318 | 0.6160765563022039 | F | F | F |
| 0.1696015544058724 | 0.4325678957130350 | 0.6302162978772969 | F | F | F |
| 0.3245524865666596 | 0.8141206723693344 | 0.6654559099501753 | F | F | F |
| 0.6662187468277452 | 0.3938441150176502 | 0.6276595231455957 | F | F | F |
| 0.9266414898463324 | 0.9166133831432433 | 0.6160765563022039 | F | F | F |
| 0.3969660861330055 | 0.1690672319202733 | 0.6302162978772969 | F | F | F |
| 0.8593569123797522 | 0.3233549040052850 | 0.6654559099501753 | F | F | F |
| 0.9383551867246638 | 0.6651398428978581 | 0.6276595231455957 | F | F | F |
| 0.1555405424342524 | 0.9245750032457849 | 0.6160765563022039 | F | F | F |
| 0.4333710451824828 | 0.3964989024812127 | 0.6302162978772969 | F | F | F |
| 0.1839746083192395 | 0.1397664555379237 | 0.6231196809846153 | F | F | F |
| 0.6046395148089374 | 0.0613155675680872 | 0.6609160677891879 | F | F | F |
| 0.0822477308365634 | 0.8435324815089373 | 0.6724990330310092 | F | F | F |
| 0.8303351723545234 | 0.5653498794420528 | 0.6583592930574795 | F | F | F |
| 0.6753841932572655 | 0.1837971027857606 | 0.6231196809846153 | F | F | F |
| 0.3337179329961870 | 0.6040736601374377 | 0.6609160677891879 | F | F | F |
| 0.0732951833242197 | 0.0813043953361117 | 0.6724990330310092 | F | F | F |
| 0.6029705936909266 | 0.8288505432348146 | 0.6583592930574795 | F | F | F |
| 0.1405798143202901 | 0.6745628242694224 | 0.6231196809846153 | F | F | F |
| 0.0615815399753714 | 0.3327778853768564 | 0.6609160677891879 | F | F | F |



|                    |                    |                    |   |   |   |
|--------------------|--------------------|--------------------|---|---|---|
| 0.8443961875860566 | 0.0733427183786404 | 0.6724990330310092 | F | F | F |
| 0.5665656815175595 | 0.6014188257935018 | 0.6583592930574795 | F | F | F |
| 0.5157056528974664 | 0.4723168025344222 | 0.7031710746865940 | F | F | F |
| 0.9382179561018660 | 0.3938357985626055 | 0.7407554663269664 | F | F | F |
| 0.4134789539146055 | 0.1791020841611726 | 0.7528988135720383 | F | F | F |
| 0.1652751896643423 | 0.8971290675402415 | 0.7385849480023765 | F | F | F |
| 0.0115883806741621 | 0.5147326163742747 | 0.7031710746865940 | F | F | F |
| 0.6667554280548842 | 0.9368543259418871 | 0.7407554663269664 | F | F | F |
| 0.4068903253506875 | 0.4130228565151839 | 0.7528988135720383 | F | F | F |
| 0.9354551584237285 | 0.1641872661653920 | 0.7385849480023765 | F | F | F |
| 0.4726453699615192 | 0.0111632294020509 | 0.7031710746865940 | F | F | F |
| 0.3948988741132311 | 0.6650179164863772 | 0.7407554663269664 | F | F | F |
| 0.1795706135457422 | 0.4061412956967914 | 0.7528988135720383 | F | F | F |
| 0.8991418888258949 | 0.9343893682713826 | 0.7385849480023765 | F | F | F |
| 0.1502554041553523 | 0.1930157623298641 | 0.7457436406118987 | F | F | F |
| 0.7266437877272409 | 0.2720664091381622 | 0.7077767387407548 | F | F | F |
| 0.2526127549163633 | 0.4863993494907461 | 0.6961638816933373 | F | F | F |
| 0.5025216625734217 | 0.7656930053037172 | 0.7101169368244840 | F | F | F |
| 0.6558603363579962 | 0.1500934214450282 | 0.7457436406118987 | F | F | F |
| 0.0011556798742944 | 0.7256778258794370 | 0.7077767387407548 | F | F | F |
| 0.2602591083369674 | 0.2519335125370645 | 0.6961638816933373 | F | F | F |
| 0.7300562656035439 | 0.5011895953132282 | 0.7101169368244840 | F | F | F |
| 0.1938240818969916 | 0.6551493419751111 | 0.7457436406118987 | F | F | F |
| 0.2721399812473635 | 0.0004733764911151 | 0.7077767387407548 | F | F | F |
| 0.4870674713351235 | 0.2598722351273111 | 0.6961638816933373 | F | F | F |
| 0.7672940286364280 | 0.7287924234005558 | 0.7101169368244840 | F | F | F |
| 0.8180916939369417 | 0.8420475439033981 | 0.9013825805389369 | T | T | T |
| 0.8500402386933502 | 0.8038034087606976 | 0.7823813726228482 | T | T | T |
| 0.2625226837122055 | 0.7339958392678202 | 0.8180694513674611 | T | T | T |
| 0.4009910848698602 | 0.9297973419804141 | 0.8675972194149499 | T | T | T |
| 0.7505458413462170 | 0.5122295245168674 | 0.8316692852287541 | T | T | T |
| 0.9240755225581126 | 0.1511346398192109 | 0.8561310731862123 | T | T | T |
| 0.4977910295868838 | 0.2293777175445561 | 0.8184700270908127 | T | T | T |
| 0.1800055405120947 | 0.4253535412521146 | 0.8730959767969718 | T | T | T |
| 0.4058945857077364 | 0.6857290969938843 | 0.8681661790829758 | T | T | T |
| 0.3431861583872873 | 0.8495763005045383 | 0.7836420904890332 | T | T | T |
| 0.9981887184081557 | 0.2717796137791018 | 0.8190622227136278 | T | T | T |
| 0.6632692943170536 | 0.4046174396176921 | 0.8655445278796744 | T | T | T |
| 0.7387130139153751 | 0.7471976203322427 | 0.8310913899114541 | T | T | T |
| 0.9318234766186870 | 0.9137404849787105 | 0.8564056576851625 | T | T | T |
| 0.2693138548035015 | 0.4960599082935841 | 0.8183731546305471 | T | T | T |
| 0.3966887090498998 | 0.1657299413339382 | 0.8709653258967281 | T | T | T |
| 0.8482775944615624 | 0.3373473853837204 | 0.9005432561060327 | T | T | T |
| 0.8061226633220586 | 0.3438039717769941 | 0.7827740473936596 | T | T | T |

|                    |                    |                    |   |   |   |
|--------------------|--------------------|--------------------|---|---|---|
| 0.7311980313308826 | 0.9962027866241289 | 0.8210307489927581 | T | T | T |
| 0.9326716450720692 | 0.6645997345933516 | 0.8625096288808148 | T | T | T |
| 0.5225881503387086 | 0.7411429718078826 | 0.8317901267232801 | T | T | T |
| 0.1401390610712227 | 0.9285871587453687 | 0.8585170945237073 | T | T | T |
| 0.2318641963693192 | 0.2663068560552421 | 0.8197736886721021 | T | T | T |
| 0.4381329050195066 | 0.3972707890822959 | 0.8703743133161000 | T | T | T |
| 0.4815084363055984 | 0.5213300258229898 | 0.8211192407624091 | T | T | T |
| 0.1718782372321008 | 0.1369365558037557 | 0.8608726121848124 | T | T | T |
| 0.6035871046933571 | 0.0557626398014169 | 0.8976825468375584 | T | T | T |
| 0.0649301381771315 | 0.6018514161866401 | 0.7879186330149200 | T | T | T |
| 0.0612862204160485 | 0.8534089929179024 | 0.9144756480641892 | T | T | T |
| 0.5868551389624150 | 0.8205888284803210 | 0.7749278699559230 | T | T | T |
| 0.8251304883172429 | 0.5748054261133224 | 0.8964260297413759 | T | T | T |
| 0.8368483735642428 | 0.0987199061341462 | 0.7899925084839517 | T | T | T |
| 0.9946787058576748 | 0.4791532666112209 | 0.8253648720537242 | T | T | T |
| 0.6782823146384488 | 0.1808686384170839 | 0.8623022148288124 | T | T | T |
| 0.3376036325839975 | 0.5774769866643187 | 0.9113734380168461 | T | T | T |
| 0.3320788166819226 | 0.0616008684963472 | 0.7878640483201182 | T | T | T |
| 0.0615027984804709 | 0.0833361019050252 | 0.9130270528536273 | T | T | T |
| 0.5909996790483275 | 0.5866094049745526 | 0.7760066561997701 | T | T | T |
| 0.6044985017446001 | 0.8147418960835793 | 0.8965558771070791 | T | T | T |
| 0.0606503456215220 | 0.8353525343885936 | 0.7898039138234643 | T | T | T |
| 0.5265939751371093 | 0.9892777491902539 | 0.8235809043707563 | T | T | T |
| 0.1505598233613740 | 0.6770680845966981 | 0.8656274601443177 | T | T | T |
| 0.0630094601370634 | 0.3378078818583780 | 0.8988778056948553 | T | T | T |
| 0.6070618033170065 | 0.3281553195249124 | 0.7874930762702660 | T | T | T |
| 0.8519571501510516 | 0.0717697918117919 | 0.9092725014117214 | T | T | T |
| 0.8229381763165050 | 0.5900056428279077 | 0.7752915169471118 | T | T | T |
| 0.5935616277513263 | 0.5952878785554707 | 0.9013288907304216 | T | T | T |
| 0.0991616023684720 | 0.0623538152442598 | 0.7896595810012839 | T | T | T |
| 0.6589993700544049 | 0.3039669472262649 | 0.9345267859733680 | T | T | T |
| 0.0428791048904310 | 0.6073963213485016 | 0.9216173476520518 | T | T | T |
| 0.2790644659194636 | 0.1207928164673029 | 0.9222559544250022 | T | T | T |
| 0.5231281493044054 | 0.2493844358670229 | 0.9358622051254482 | T | T | T |
| 0.6943515718542230 | 0.2982659744739751 | 0.9569156173038358 | T | T | T |
| 0.0303496302691892 | 0.6100191113814500 | 0.9470638903292725 | T | T | T |
| 0.2521178765549831 | 0.1421011755732577 | 0.9462320002122226 | T | T | T |
| 0.5835082148804293 | 0.2716995324802241 | 0.9373879098976154 | T | T | T |
| 0.5574285246906026 | 0.1749614015202940 | 0.9426715424429591 | T | T | T |
| 0.0605281854640663 | 0.8625664647685317 | 0.9401334875162656 | T | T | T |
| 0.0423798256602650 | 0.0941141802771474 | 0.9380955706620225 | T | T | T |
| 0.3430474138296603 | 0.5566394674202715 | 0.9362098952997490 | T | T | T |
| 0.3244026832689650 | 0.8292953571609645 | 0.9297885022421867 | T | T | T |

Best + 2

In Sn O H Pt

1.0000000000000000

14.6581653332033461 0.0000000000000000 0.0000000000000000

7.3189795989957736 12.7095316657975506 0.0000000000000000

-0.0098891034462902 -0.0168642175486257 37.7150080587397056

In Sn O H Pt

56 8 100 8 1

Selective dynamics

Direct

0.7601355639032334 0.0113491388480114 0.6389314665380326 F F F

0.2398011528578508 0.9865686263342539 0.6496441292015049 F F F

0.7715609358761526 0.2384774583519729 0.6496441292015049 F F F

0.0114274436599118 0.2273539761562873 0.6389314665380326 F F F

0.9885092730793446 0.7705637720692522 0.6496441292015049 F F F

0.9992924867227941 0.4989588874152986 0.6442878065983919 F F F

0.5006104591753910 0.9976863097953554 0.6442878065983919 F F F

0.5711050139140639 0.3215061998213713 0.7302137251482463 F F F

0.0957725477933451 0.3440739638851937 0.7190771920085552 F F F

0.5954026351313857 0.8431342143429106 0.7184445361110789 F F F

0.0723481839551638 0.8196467319278042 0.7300196610483383 F F F

0.1070672751660240 0.5702693439724342 0.7302137251482463 F F F

0.5592186766464877 0.0954719189441917 0.7190771920085552 F F F

0.5598634887194152 0.5938629574054701 0.7184445361110789 F F F

0.1070866522751501 0.0714678941073643 0.7300196610483383 F F F

0.3217673805293373 0.1064662464661481 0.7302137251482463 F F F

0.3449483355957312 0.5586839063775031 0.7190771920085552 F F F

0.8446059148989562 0.5586868263331084 0.7184445361110789 F F F

0.8205048314696768 0.1071269550956586 0.7300196610483383 F F F

0.3340699873820370 0.8315250108956107 0.7242646141760360 F F F

0.8324703755049825 0.3328596096534895 0.7242646141760360 F F F

0.3333132055655028 0.3327453316617905 0.7248359247731742 F F F

0.8333317331272525 0.8313056494183115 0.7242646141760360 F F F

0.2283757639079198 0.7594403068302924 0.6389314665380326 F F F

0.4999683632135756 0.4989588874152986 0.6442878065983919 F F F

0.7722030242013673 0.7372048960276700 0.6496441328851290 F F F

0.4891851419039881 0.7705637644234216 0.6496441328851290 F F F

0.7384831957080280 0.4878411963083735 0.6496441328851290 F F F

0.7611287312946142 0.9999649381470125 0.8789041472353021 T T T

0.9080491804427171 0.6500406935912875 0.8069324307721554 T T T

0.4240758713873161 0.6826385288088306 0.8014261844963423 T T T

0.9275983126364753 0.1765211696326361 0.7981992611404312 T T T

0.4028086053534162 0.1556720836760592 0.8102321284491529 T T T

|                    |                    |                    |   |   |   |
|--------------------|--------------------|--------------------|---|---|---|
| 0.2427222238732800 | 0.7522024596811432 | 0.8782232816313429 | T | T | T |
| 0.4416007488112912 | 0.9056011859470355 | 0.8079238280348907 | T | T | T |
| 0.8969649545139422 | 0.4251625313718755 | 0.7980129979024727 | T | T | T |
| 0.7629619789738052 | 0.2569051318961492 | 0.8832686929522630 | T | T | T |
| 0.8933338944390860 | 0.9260492050360396 | 0.7980286215830282 | T | T | T |
| 0.4404576783878563 | 0.3995986353124960 | 0.8098957000483701 | T | T | T |
| 0.2259476067039190 | 0.2503634273146650 | 0.8802421860851267 | T | T | T |
| 0.0044424349344902 | 0.2405734503631674 | 0.8776856732343763 | T | T | T |
| 0.6503320857156406 | 0.4420139460559617 | 0.8070570503686763 | T | T | T |
| 0.6785619982387912 | 0.8936830270001178 | 0.7972072686381794 | T | T | T |
| 0.1750421982744542 | 0.8927807369756928 | 0.7986746483164631 | T | T | T |
| 0.1576425725844358 | 0.4349510155452656 | 0.8107403763850107 | T | T | T |
| 0.5160102696517965 | 0.2226560164014710 | 0.8777868864206649 | T | T | T |
| 0.6687556664786152 | 0.6665611207928677 | 0.8004208382783535 | T | T | T |
| 0.0061743372741466 | 0.5012796222741562 | 0.8855032845516092 | T | T | T |
| 0.6687910508524834 | 0.1626532566246039 | 0.8042133429551931 | T | T | T |
| 0.4824258247252767 | 0.5310256040461849 | 0.8787900585502537 | T | T | T |
| 0.1654085405179582 | 0.1639729818635784 | 0.8039628106436060 | T | T | T |
| 0.5074780533320894 | 0.9934706392623294 | 0.8812376406734481 | T | T | T |
| 0.1637820395032965 | 0.6665275315363727 | 0.8039059175470999 | T | T | T |
| 0.2452614356269538 | 0.0015908431116511 | 0.8956264687218974 | T | T | T |
| 0.2640817874058527 | 0.5105179245696537 | 0.8769125023190907 | T | T | T |
| 0.9885012221589754 | 0.7569025153002309 | 0.8893010424464958 | T | T | T |
| 0.2277336602504292 | 0.2607128538629411 | 0.6389314702216780 | F | F | F |
| 0.5107516054408165 | 0.2273539685104495 | 0.6389314702216780 | F | F | F |
| 0.2614535057798690 | 0.5100765994651582 | 0.6389314702216780 | F | F | F |
| 0.0000021130779260 | 0.0002314344439824 | 0.6442877992311082 | F | F | F |
| 0.7386691652123382 | 0.4993831507956595 | 0.8849470832221106 | T | T | T |
| 0.7684197784055413 | 0.7368586025731358 | 0.8842584337706999 | T | T | T |
| 0.4912439470519389 | 0.7659960337338839 | 0.8854401079337740 | T | T | T |
| 0.9974832990184166 | 0.9945940634684006 | 0.8825220488788128 | T | T | T |
| 0.8159621184411563 | 0.8581513196171642 | 0.6654559099501753 | F | F | F |
| 0.3952972119514584 | 0.9366022075870006 | 0.6276595231455957 | F | F | F |
| 0.9176889992569386 | 0.1543852969704318 | 0.6160765563022039 | F | F | F |
| 0.1696015544058724 | 0.4325678957130350 | 0.6302162978772969 | F | F | F |
| 0.3245524865666596 | 0.8141206723693344 | 0.6654559099501753 | F | F | F |
| 0.6662187468277452 | 0.3938441150176502 | 0.6276595231455957 | F | F | F |
| 0.9266414898463324 | 0.9166133831432433 | 0.6160765563022039 | F | F | F |
| 0.3969660861330055 | 0.1690672319202733 | 0.6302162978772969 | F | F | F |
| 0.8593569123797522 | 0.3233549040052850 | 0.6654559099501753 | F | F | F |
| 0.9383551867246638 | 0.6651398428978581 | 0.6276595231455957 | F | F | F |
| 0.1555405424342524 | 0.9245750032457849 | 0.6160765563022039 | F | F | F |
| 0.4333710451824828 | 0.3964989024812127 | 0.6302162978772969 | F | F | F |
| 0.1839746083192395 | 0.1397664555379237 | 0.6231196809846153 | F | F | F |

|                    |                    |                    |   |   |   |
|--------------------|--------------------|--------------------|---|---|---|
| 0.6046395148089374 | 0.0613155675680872 | 0.6609160677891879 | F | F | F |
| 0.0822477308365634 | 0.8435324815089373 | 0.6724990330310092 | F | F | F |
| 0.8303351723545234 | 0.5653498794420528 | 0.6583592930574795 | F | F | F |
| 0.6753841932572655 | 0.1837971027857606 | 0.6231196809846153 | F | F | F |
| 0.3337179329961870 | 0.6040736601374377 | 0.6609160677891879 | F | F | F |
| 0.0732951833242197 | 0.0813043953361117 | 0.6724990330310092 | F | F | F |
| 0.6029705936909266 | 0.8288505432348146 | 0.6583592930574795 | F | F | F |
| 0.1405798143202901 | 0.6745628242694224 | 0.6231196809846153 | F | F | F |
| 0.0615815399753714 | 0.3327778853768564 | 0.6609160677891879 | F | F | F |
| 0.8443961875860566 | 0.0733427183786404 | 0.6724990330310092 | F | F | F |
| 0.5665656815175595 | 0.6014188257935018 | 0.6583592930574795 | F | F | F |
| 0.5157056528974664 | 0.4723168025344222 | 0.7031710746865940 | F | F | F |
| 0.9382179561018660 | 0.3938357985626055 | 0.7407554663269664 | F | F | F |
| 0.4134789539146055 | 0.1791020841611726 | 0.7528988135720383 | F | F | F |
| 0.1652751896643423 | 0.8971290675402415 | 0.7385849480023765 | F | F | F |
| 0.0115883806741621 | 0.5147326163742747 | 0.7031710746865940 | F | F | F |
| 0.6667554280548842 | 0.9368543259418871 | 0.7407554663269664 | F | F | F |
| 0.4068903253506875 | 0.4130228565151839 | 0.7528988135720383 | F | F | F |
| 0.9354551584237285 | 0.1641872661653920 | 0.7385849480023765 | F | F | F |
| 0.4726453699615192 | 0.0111632294020509 | 0.7031710746865940 | F | F | F |
| 0.3948988741132311 | 0.6650179164863772 | 0.7407554663269664 | F | F | F |
| 0.1795706135457422 | 0.4061412956967914 | 0.7528988135720383 | F | F | F |
| 0.8991418888258949 | 0.9343893682713826 | 0.7385849480023765 | F | F | F |
| 0.1502554041553523 | 0.1930157623298641 | 0.7457436406118987 | F | F | F |
| 0.7266437877272409 | 0.2720664091381622 | 0.7077767387407548 | F | F | F |
| 0.2526127549163633 | 0.4863993494907461 | 0.6961638816933373 | F | F | F |
| 0.5025216625734217 | 0.7656930053037172 | 0.7101169368244840 | F | F | F |
| 0.6558603363579962 | 0.1500934214450282 | 0.7457436406118987 | F | F | F |
| 0.0011556798742944 | 0.7256778258794370 | 0.7077767387407548 | F | F | F |
| 0.2602591083369674 | 0.2519335125370645 | 0.6961638816933373 | F | F | F |
| 0.7300562656035439 | 0.5011895953132282 | 0.7101169368244840 | F | F | F |
| 0.1938240818969916 | 0.6551493419751111 | 0.7457436406118987 | F | F | F |
| 0.2721399812473635 | 0.0004733764911151 | 0.7077767387407548 | F | F | F |
| 0.4870674713351235 | 0.2598722351273111 | 0.6961638816933373 | F | F | F |
| 0.7672940286364280 | 0.7287924234005558 | 0.7101169368244840 | F | F | F |
| 0.8161955824535416 | 0.8406975766961612 | 0.9013243634465838 | T | T | T |
| 0.8503507935745368 | 0.8037078771894804 | 0.7824368880357925 | T | T | T |
| 0.2621068877672821 | 0.7312645135438274 | 0.8172657775733219 | T | T | T |
| 0.4004460928648151 | 0.9338264641087369 | 0.8669891937860474 | T | T | T |
| 0.7484996644701224 | 0.5139526095983045 | 0.8312988190517641 | T | T | T |
| 0.9215851973510526 | 0.1473978426214471 | 0.8585314574208668 | T | T | T |
| 0.5002308199514190 | 0.2276427517128613 | 0.8185827644589850 | T | T | T |
| 0.1805568398715101 | 0.4256021709465282 | 0.8732415650878481 | T | T | T |
| 0.4065296644082740 | 0.6995674632203271 | 0.8636527258538120 | T | T | T |

|                    |                    |                    |   |   |   |
|--------------------|--------------------|--------------------|---|---|---|
| 0.3434213855132866 | 0.8500620280629853 | 0.7837145368907869 | T | T | T |
| 0.9971537255924445 | 0.2691462271329586 | 0.8196817718392883 | T | T | T |
| 0.6520718992638996 | 0.4169454582784300 | 0.8668805521361660 | T | T | T |
| 0.7394104247551289 | 0.7476611573576015 | 0.8307913236261611 | T | T | T |
| 0.9293735308083401 | 0.9165206479241074 | 0.8567112513434594 | T | T | T |
| 0.2690796048720370 | 0.4951641299437772 | 0.8182419239311010 | T | T | T |
| 0.3971111661331060 | 0.1679738594819558 | 0.8712047163624025 | T | T | T |
| 0.8448300864599481 | 0.3449285824687502 | 0.8976041048263176 | T | T | T |
| 0.8052122406047595 | 0.3438045280292219 | 0.7832708392057324 | T | T | T |
| 0.7310506361994268 | 0.9957826464197445 | 0.8206725382900498 | T | T | T |
| 0.9297972730940062 | 0.6635723559944777 | 0.8629137568417357 | T | T | T |
| 0.5284043692719156 | 0.7460809011200692 | 0.8315206382438608 | T | T | T |
| 0.1451663355517224 | 0.9240428754162606 | 0.8591005323246218 | T | T | T |
| 0.2316028982693643 | 0.2655037640022482 | 0.8200631874327229 | T | T | T |
| 0.4391675620339978 | 0.3929589821199062 | 0.8705932581944223 | T | T | T |
| 0.4789712989687883 | 0.5228987420546755 | 0.8204426900736762 | T | T | T |
| 0.1711321737047785 | 0.1359972343322807 | 0.8614696799779373 | T | T | T |
| 0.6031797275218652 | 0.0567831528673148 | 0.8980017778128263 | T | T | T |
| 0.0641462243888413 | 0.6009058888927276 | 0.7876028246262340 | T | T | T |
| 0.0661274794900606 | 0.8476970737080953 | 0.9140900066499842 | T | T | T |
| 0.5870320186635261 | 0.8214989411133548 | 0.7744205834725326 | T | T | T |
| 0.8228780929729802 | 0.5780590908432096 | 0.8975564953535230 | T | T | T |
| 0.8370158683122045 | 0.0984664594557564 | 0.7901926729261144 | T | T | T |
| 0.9946025316957273 | 0.4778203902861030 | 0.8256980400463831 | T | T | T |
| 0.6856762297232483 | 0.1756598107726306 | 0.8627953718491739 | T | T | T |
| 0.3291384669730399 | 0.5930544055978709 | 0.9034810607045025 | T | T | T |
| 0.3320732996631665 | 0.0622635935992146 | 0.7878252742843747 | T | T | T |
| 0.0605842093567709 | 0.0787924260807132 | 0.9141432801879719 | T | T | T |
| 0.5898469860403076 | 0.5886689979760462 | 0.7759899851533324 | T | T | T |
| 0.6044623395457382 | 0.8195551704562658 | 0.8965391292798263 | T | T | T |
| 0.0601325917527398 | 0.8362508119592121 | 0.7895401138558045 | T | T | T |
| 0.5270848211636587 | 0.9905869754254163 | 0.8235633950420007 | T | T | T |
| 0.1396643133799199 | 0.6804841717998962 | 0.8628946134980658 | T | T | T |
| 0.0633860751801441 | 0.3377474227635550 | 0.8991693168872152 | T | T | T |
| 0.6071479648721104 | 0.3282446743388149 | 0.7879931422993656 | T | T | T |
| 0.8639567603144930 | 0.0363527564097976 | 0.9151573436025993 | T | T | T |
| 0.8238861447219099 | 0.5891259312437369 | 0.7753400102919322 | T | T | T |
| 0.5893386545585945 | 0.6040196389160415 | 0.9015152538133149 | T | T | T |
| 0.0991617353196345 | 0.0614488946324247 | 0.7899585565972236 | T | T | T |
| 0.7293686697618196 | 0.2323028456847390 | 0.9369086884037319 | T | T | T |
| 0.0394373168311671 | 0.6092003299562384 | 0.9217805746691166 | T | T | T |
| 0.2812115999357998 | 0.1187974853999155 | 0.9218492205831819 | T | T | T |
| 0.5497166811995059 | 0.2283560489699876 | 0.9377279865206319 | T | T | T |
| 0.8251801762526146 | 0.1032212417501838 | 0.9291339952692724 | T | T | T |

|                    |                    |                    |   |   |   |
|--------------------|--------------------|--------------------|---|---|---|
| 0.7431024432500050 | 0.2748848274561189 | 0.9535163721087394 | T | T | T |
| 0.0385676042978485 | 0.6066856055522103 | 0.9475633605976834 | T | T | T |
| 0.2608341349729073 | 0.1373856297873559 | 0.9465159754011286 | T | T | T |
| 0.6147383061360997 | 0.2361772511959523 | 0.9397679449892036 | T | T | T |
| 0.5775191457473254 | 0.1514321289299685 | 0.9383432550944525 | T | T | T |
| 0.0623633992052631 | 0.8579666412652095 | 0.9397346122818021 | T | T | T |
| 0.0465878152471940 | 0.0850676019651614 | 0.9396101657516513 | T | T | T |
| 0.3293774308231453 | 0.8273940738074150 | 0.9300698811719791 | T | T | T |

Best + 3

In Sn O H Pt

1.0000000000000000

14.6581653332033461 0.0000000000000000 0.0000000000000000

7.3189795989957736 12.7095316657975506 0.0000000000000000

-0.0098891034462902 -0.0168642175486257 37.7150080587397056

In Sn O H Pt

56 8 100 8 1

Selective dynamics

Direct

|                    |                    |                    |   |   |   |
|--------------------|--------------------|--------------------|---|---|---|
| 0.7601355639032334 | 0.0113491388480114 | 0.6389314665380326 | F | F | F |
| 0.2398011528578508 | 0.9865686263342539 | 0.6496441292015049 | F | F | F |
| 0.7715609358761526 | 0.2384774583519729 | 0.6496441292015049 | F | F | F |
| 0.0114274436599118 | 0.2273539761562873 | 0.6389314665380326 | F | F | F |
| 0.9885092730793446 | 0.7705637720692522 | 0.6496441292015049 | F | F | F |
| 0.9992924867227941 | 0.4989588874152986 | 0.6442878065983919 | F | F | F |
| 0.5006104591753910 | 0.9976863097953554 | 0.6442878065983919 | F | F | F |
| 0.5711050139140639 | 0.3215061998213713 | 0.7302137251482463 | F | F | F |
| 0.0957725477933451 | 0.3440739638851937 | 0.7190771920085552 | F | F | F |
| 0.5954026351313857 | 0.8431342143429106 | 0.7184445361110789 | F | F | F |
| 0.0723481839551638 | 0.8196467319278042 | 0.7300196610483383 | F | F | F |
| 0.1070672751660240 | 0.5702693439724342 | 0.7302137251482463 | F | F | F |
| 0.5592186766464877 | 0.0954719189441917 | 0.7190771920085552 | F | F | F |
| 0.5598634887194152 | 0.5938629574054701 | 0.7184445361110789 | F | F | F |
| 0.1070866522751501 | 0.0714678941073643 | 0.7300196610483383 | F | F | F |
| 0.3217673805293373 | 0.1064662464661481 | 0.7302137251482463 | F | F | F |
| 0.3449483355957312 | 0.5586839063775031 | 0.7190771920085552 | F | F | F |
| 0.8446059148989562 | 0.5586868263331084 | 0.7184445361110789 | F | F | F |
| 0.8205048314696768 | 0.1071269550956586 | 0.7300196610483383 | F | F | F |
| 0.3340699873820370 | 0.8315250108956107 | 0.7242646141760360 | F | F | F |
| 0.8324703755049825 | 0.3328596096534895 | 0.7242646141760360 | F | F | F |
| 0.3333132055655028 | 0.3327453316617905 | 0.7248359247731742 | F | F | F |
| 0.8333317331272525 | 0.8313056494183115 | 0.7242646141760360 | F | F | F |
| 0.2283757639079198 | 0.7594403068302924 | 0.6389314665380326 | F | F | F |

|                    |                    |                    |   |   |   |
|--------------------|--------------------|--------------------|---|---|---|
| 0.4999683632135756 | 0.4989588874152986 | 0.6442878065983919 | F | F | F |
| 0.7722030242013673 | 0.7372048960276700 | 0.6496441328851290 | F | F | F |
| 0.4891851419039881 | 0.7705637644234216 | 0.6496441328851290 | F | F | F |
| 0.7384831957080280 | 0.4878411963083735 | 0.6496441328851290 | F | F | F |
| 0.7608607628312644 | 0.9994253483705225 | 0.8789498154524052 | T | T | T |
| 0.9075936719486898 | 0.6496945080968766 | 0.8067619204185492 | T | T | T |
| 0.4236858742849378 | 0.6823020095808772 | 0.8014216186982247 | T | T | T |
| 0.9274052555749264 | 0.1762734345292586 | 0.7982268351853397 | T | T | T |
| 0.4026091762206900 | 0.1553294856448283 | 0.8102411487612970 | T | T | T |
| 0.2418950603906459 | 0.7513100358064142 | 0.8782776522288143 | T | T | T |
| 0.4411803417780182 | 0.9054568279646221 | 0.8079865617662352 | T | T | T |
| 0.8964147264484031 | 0.4248533716269218 | 0.7980008614159895 | T | T | T |
| 0.7627358357278992 | 0.2560343093784125 | 0.8836215188437790 | T | T | T |
| 0.8929979388262524 | 0.9257544087988187 | 0.7980476603536713 | T | T | T |
| 0.4403466312927568 | 0.3990238782425066 | 0.8098616502238142 | T | T | T |
| 0.2253657889995125 | 0.2503300152869284 | 0.8801828870246188 | T | T | T |
| 0.0040490040563607 | 0.2400068356048529 | 0.8777248179803268 | T | T | T |
| 0.6500082037921245 | 0.4416562998295805 | 0.8070488480474208 | T | T | T |
| 0.6782336792978094 | 0.8934198479582159 | 0.7971791525500335 | T | T | T |
| 0.1748733209650638 | 0.8922418549739562 | 0.7986890059844575 | T | T | T |
| 0.1570924341575725 | 0.4345089921780971 | 0.8106336835997729 | T | T | T |
| 0.5159138739396435 | 0.2219432476653676 | 0.8777189340573018 | T | T | T |
| 0.6681396357907526 | 0.6664592835894998 | 0.8004129102959038 | T | T | T |
| 0.0049513378097277 | 0.5008997490278670 | 0.8853531530127657 | T | T | T |
| 0.6687482078493270 | 0.1622243184055108 | 0.8042039011045538 | T | T | T |
| 0.4821689160476495 | 0.5303423265945703 | 0.8787479767374580 | T | T | T |
| 0.1651560087472567 | 0.1635586266403141 | 0.8040011653032366 | T | T | T |
| 0.5070210389188882 | 0.9931000554895590 | 0.8813133244579603 | T | T | T |
| 0.1634222982130880 | 0.6659801672183737 | 0.8038473774759055 | T | T | T |
| 0.2450324600593885 | 0.0014400314306036 | 0.8958074802328365 | T | T | T |
| 0.2637139899315674 | 0.5095122238795717 | 0.8766793292112268 | T | T | T |
| 0.9877829931836980 | 0.7559554685637415 | 0.8891693101010691 | T | T | T |
| 0.2277336602504292 | 0.2607128538629411 | 0.6389314702216780 | F | F | F |
| 0.5107516054408165 | 0.2273539685104495 | 0.6389314702216780 | F | F | F |
| 0.2614535057798690 | 0.5100765994651582 | 0.6389314702216780 | F | F | F |
| 0.0000021130779260 | 0.0002314344439824 | 0.6442877992311082 | F | F | F |
| 0.7381074689401291 | 0.4986103174838710 | 0.8849108995444932 | T | T | T |
| 0.7674887405418128 | 0.7365137405098242 | 0.8841723619380922 | T | T | T |
| 0.4903534021810629 | 0.7655115968648919 | 0.8854343312514419 | T | T | T |
| 0.9972025986040166 | 0.9940465957212617 | 0.8824080783598433 | T | T | T |
| 0.8159621184411563 | 0.8581513196171642 | 0.6654559099501753 | F | F | F |
| 0.3952972119514584 | 0.9366022075870006 | 0.6276595231455957 | F | F | F |
| 0.9176889992569386 | 0.1543852969704318 | 0.6160765563022039 | F | F | F |
| 0.1696015544058724 | 0.4325678957130350 | 0.6302162978772969 | F | F | F |



|                    |                    |                    |   |   |   |
|--------------------|--------------------|--------------------|---|---|---|
| 0.3245524865666596 | 0.8141206723693344 | 0.6654559099501753 | F | F | F |
| 0.6662187468277452 | 0.3938441150176502 | 0.6276595231455957 | F | F | F |
| 0.9266414898463324 | 0.9166133831432433 | 0.6160765563022039 | F | F | F |
| 0.3969660861330055 | 0.1690672319202733 | 0.6302162978772969 | F | F | F |
| 0.8593569123797522 | 0.3233549040052850 | 0.6654559099501753 | F | F | F |
| 0.9383551867246638 | 0.6651398428978581 | 0.6276595231455957 | F | F | F |
| 0.1555405424342524 | 0.9245750032457849 | 0.6160765563022039 | F | F | F |
| 0.4333710451824828 | 0.3964989024812127 | 0.6302162978772969 | F | F | F |
| 0.1839746083192395 | 0.1397664555379237 | 0.6231196809846153 | F | F | F |
| 0.6046395148089374 | 0.0613155675680872 | 0.6609160677891879 | F | F | F |
| 0.0822477308365634 | 0.8435324815089373 | 0.6724990330310092 | F | F | F |
| 0.8303351723545234 | 0.5653498794420528 | 0.6583592930574795 | F | F | F |
| 0.6753841932572655 | 0.1837971027857606 | 0.6231196809846153 | F | F | F |
| 0.3337179329961870 | 0.6040736601374377 | 0.6609160677891879 | F | F | F |
| 0.0732951833242197 | 0.0813043953361117 | 0.6724990330310092 | F | F | F |
| 0.6029705936909266 | 0.8288505432348146 | 0.6583592930574795 | F | F | F |
| 0.1405798143202901 | 0.6745628242694224 | 0.6231196809846153 | F | F | F |
| 0.0615815399753714 | 0.3327778853768564 | 0.6609160677891879 | F | F | F |
| 0.8443961875860566 | 0.0733427183786404 | 0.6724990330310092 | F | F | F |
| 0.5665656815175595 | 0.6014188257935018 | 0.6583592930574795 | F | F | F |
| 0.5157056528974664 | 0.4723168025344222 | 0.7031710746865940 | F | F | F |
| 0.9382179561018660 | 0.3938357985626055 | 0.7407554663269664 | F | F | F |
| 0.4134789539146055 | 0.1791020841611726 | 0.7528988135720383 | F | F | F |
| 0.1652751896643423 | 0.8971290675402415 | 0.7385849480023765 | F | F | F |
| 0.0115883806741621 | 0.5147326163742747 | 0.7031710746865940 | F | F | F |
| 0.6667554280548842 | 0.9368543259418871 | 0.7407554663269664 | F | F | F |
| 0.4068903253506875 | 0.4130228565151839 | 0.7528988135720383 | F | F | F |
| 0.9354551584237285 | 0.1641872661653920 | 0.7385849480023765 | F | F | F |
| 0.4726453699615192 | 0.0111632294020509 | 0.7031710746865940 | F | F | F |
| 0.3948988741132311 | 0.6650179164863772 | 0.7407554663269664 | F | F | F |
| 0.1795706135457422 | 0.4061412956967914 | 0.7528988135720383 | F | F | F |
| 0.8991418888258949 | 0.9343893682713826 | 0.7385849480023765 | F | F | F |
| 0.1502554041553523 | 0.1930157623298641 | 0.7457436406118987 | F | F | F |
| 0.7266437877272409 | 0.2720664091381622 | 0.7077767387407548 | F | F | F |
| 0.2526127549163633 | 0.4863993494907461 | 0.6961638816933373 | F | F | F |
| 0.5025216625734217 | 0.7656930053037172 | 0.7101169368244840 | F | F | F |
| 0.6558603363579962 | 0.1500934214450282 | 0.7457436406118987 | F | F | F |
| 0.0011556798742944 | 0.7256778258794370 | 0.7077767387407548 | F | F | F |
| 0.2602591083369674 | 0.2519335125370645 | 0.6961638816933373 | F | F | F |
| 0.7300562656035439 | 0.5011895953132282 | 0.7101169368244840 | F | F | F |
| 0.1938240818969916 | 0.6551493419751111 | 0.7457436406118987 | F | F | F |
| 0.2721399812473635 | 0.0004733764911151 | 0.7077767387407548 | F | F | F |
| 0.4870674713351235 | 0.2598722351273111 | 0.6961638816933373 | F | F | F |
| 0.7672940286364280 | 0.7287924234005558 | 0.7101169368244840 | F | F | F |

|                    |                    |                    |   |   |   |
|--------------------|--------------------|--------------------|---|---|---|
| 0.8155671705976841 | 0.8401988333484499 | 0.9012574831905984 | T | T | T |
| 0.8502149612186850 | 0.8033438067608745 | 0.7823791236716753 | T | T | T |
| 0.2618224680777629 | 0.7304261526756141 | 0.8172694234487705 | T | T | T |
| 0.3998246360414893 | 0.9334765033315692 | 0.8670622347461640 | T | T | T |
| 0.7476949709311280 | 0.5135634007690952 | 0.8312703205619072 | T | T | T |
| 0.9213404120983555 | 0.1471242448011498 | 0.8585662421305829 | T | T | T |
| 0.5002994280290582 | 0.2270057455741565 | 0.8184938505058920 | T | T | T |
| 0.1793316768112020 | 0.4255459675735793 | 0.8730262033037617 | T | T | T |
| 0.4055754079577976 | 0.6991708162391309 | 0.8636121175175631 | T | T | T |
| 0.3431320731832411 | 0.8499449084380742 | 0.7836779685133687 | T | T | T |
| 0.9968671838020113 | 0.2688237601844848 | 0.8197351269851519 | T | T | T |
| 0.6519228868120278 | 0.4154412901698050 | 0.8667795583748507 | T | T | T |
| 0.7385761299032254 | 0.7475959144090454 | 0.8306847686217143 | T | T | T |
| 0.9290429625367754 | 0.9157265555557945 | 0.8567300629825664 | T | T | T |
| 0.2688110715652545 | 0.4942767885505171 | 0.8179961123444673 | T | T | T |
| 0.3967671261454609 | 0.1676771111596989 | 0.8711632423929374 | T | T | T |
| 0.8443735794945086 | 0.3443180147997455 | 0.8976508203080278 | T | T | T |
| 0.8049923301939128 | 0.3435572805767487 | 0.7832590466156605 | T | T | T |
| 0.7307178325238767 | 0.9954427806543000 | 0.8206482228143269 | T | T | T |
| 0.9285558113133304 | 0.6633146228448841 | 0.8627119843970085 | T | T | T |
| 0.5274870536899336 | 0.7459806141762545 | 0.8314980870169614 | T | T | T |
| 0.1446924666313772 | 0.9228638097650489 | 0.8589707283891218 | T | T | T |
| 0.2312092699523014 | 0.2650759923607732 | 0.8200930429310082 | T | T | T |
| 0.4387182416790099 | 0.3920241308691418 | 0.8704070780767194 | T | T | T |
| 0.4786626202415006 | 0.5224741373663149 | 0.8204490266934550 | T | T | T |
| 0.1707118749235452 | 0.1355573314954213 | 0.8615234895722581 | T | T | T |
| 0.6028570980597530 | 0.0564812610117153 | 0.8981239174915968 | T | T | T |
| 0.0636613301680430 | 0.6005794557739667 | 0.7874120731453950 | T | T | T |
| 0.0663557152427158 | 0.8465455626197900 | 0.9137856404680076 | T | T | T |
| 0.5867175014935000 | 0.8214922488108858 | 0.7744215973254660 | T | T | T |
| 0.8219725601916323 | 0.5776164997762326 | 0.8974604212730596 | T | T | T |
| 0.8368901308439722 | 0.0982864550596523 | 0.7902187077862923 | T | T | T |
| 0.9941402213826821 | 0.4774857079816507 | 0.8255234728677312 | T | T | T |
| 0.6857043092599775 | 0.1750248326916394 | 0.8628569281694252 | T | T | T |
| 0.3288715650247647 | 0.5918056984528167 | 0.9033122623763113 | T | T | T |
| 0.3318725970291294 | 0.0621568329446570 | 0.7878318043890500 | T | T | T |
| 0.0604302204901097 | 0.0784068227310600 | 0.9140670097315239 | T | T | T |
| 0.5896911547996447 | 0.5885047083805062 | 0.7759676445903840 | T | T | T |
| 0.6035412665665852 | 0.8190324438477763 | 0.8965951324862134 | T | T | T |
| 0.0597148186877519 | 0.8358227942201937 | 0.7895371376575392 | T | T | T |
| 0.5269020192927146 | 0.9901258856467161 | 0.8236732791068930 | T | T | T |
| 0.1390902018304135 | 0.6790218221598145 | 0.8628540205957340 | T | T | T |
| 0.0626629354265220 | 0.3374499501279572 | 0.8991959250744934 | T | T | T |
| 0.6071075636365808 | 0.3278214937444415 | 0.7879829207951187 | T | T | T |

|                    |                    |                    |   |   |   |
|--------------------|--------------------|--------------------|---|---|---|
| 0.8641570311036292 | 0.0355233278751725 | 0.9151828465077287 | T | T | T |
| 0.8233897026113722 | 0.5887851882499355 | 0.7753313739005592 | T | T | T |
| 0.5886198550425765 | 0.6029883584233110 | 0.9012788916575887 | T | T | T |
| 0.0990526716952925 | 0.0611797200919240 | 0.7899614865969263 | T | T | T |
| 0.7302652683592543 | 0.2306493092599204 | 0.9374205752753584 | T | T | T |
| 0.0378867021582451 | 0.6080235476545574 | 0.9216466406781222 | T | T | T |
| 0.2811194950576995 | 0.1188606091601542 | 0.9218581766749614 | T | T | T |
| 0.5490492636290287 | 0.2285819113374311 | 0.9377013131144626 | T | T | T |
| 0.8255490579135892 | 0.1021922510384144 | 0.9293034303880621 | T | T | T |
| 0.7447605559076260 | 0.2727509323365957 | 0.9539718136993138 | T | T | T |
| 0.0352213498498600 | 0.6060693053217282 | 0.9474198992652726 | T | T | T |
| 0.2598083306497693 | 0.1379988061380238 | 0.9464409252381962 | T | T | T |
| 0.6142747145006571 | 0.2359063464961385 | 0.9399829515987759 | T | T | T |
| 0.5764752276055211 | 0.1517272308499062 | 0.9384902078116636 | T | T | T |
| 0.0638914081177059 | 0.8559753280164387 | 0.9394500179211495 | T | T | T |
| 0.0464007789510346 | 0.0846022513823094 | 0.9395251420742717 | T | T | T |
| 0.3285928893433220 | 0.8270935743024204 | 0.9301607456831630 | T | T | T |

Best + 4

In Sn O H Pt

1.0000000000000000

14.6581653332033461 0.0000000000000000 0.0000000000000000

7.3189795989957736 12.7095316657975506 0.0000000000000000

-0.0098891034462902 -0.0168642175486257 37.7150080587397056

In Sn O H Pt

56 8 100 8 1

Selective dynamics

Direct

0.7601355639032334 0.0113491388480114 0.6389314665380326 F F F

0.2398011528578508 0.9865686263342539 0.6496441292015049 F F F

0.7715609358761526 0.2384774583519729 0.6496441292015049 F F F

0.0114274436599118 0.2273539761562873 0.6389314665380326 F F F

0.9885092730793446 0.7705637720692522 0.6496441292015049 F F F

0.9992924867227941 0.4989588874152986 0.6442878065983919 F F F

0.5006104591753910 0.9976863097953554 0.6442878065983919 F F F

0.5711050139140639 0.3215061998213713 0.7302137251482463 F F F

0.0957725477933451 0.3440739638851937 0.7190771920085552 F F F

0.5954026351313857 0.8431342143429106 0.7184445361110789 F F F

0.0723481839551638 0.8196467319278042 0.7300196610483383 F F F

0.1070672751660240 0.5702693439724342 0.7302137251482463 F F F

0.5592186766464877 0.0954719189441917 0.7190771920085552 F F F

0.5598634887194152 0.5938629574054701 0.7184445361110789 F F F

0.1070866522751501 0.0714678941073643 0.7300196610483383 F F F

|                    |                    |                    |   |   |   |
|--------------------|--------------------|--------------------|---|---|---|
| 0.3217673805293373 | 0.1064662464661481 | 0.7302137251482463 | F | F | F |
| 0.3449483355957312 | 0.5586839063775031 | 0.7190771920085552 | F | F | F |
| 0.8446059148989562 | 0.5586868263331084 | 0.7184445361110789 | F | F | F |
| 0.8205048314696768 | 0.1071269550956586 | 0.7300196610483383 | F | F | F |
| 0.3340699873820370 | 0.8315250108956107 | 0.7242646141760360 | F | F | F |
| 0.8324703755049825 | 0.3328596096534895 | 0.7242646141760360 | F | F | F |
| 0.3333132055655028 | 0.3327453316617905 | 0.7248359247731742 | F | F | F |
| 0.8333317331272525 | 0.8313056494183115 | 0.7242646141760360 | F | F | F |
| 0.2283757639079198 | 0.7594403068302924 | 0.6389314665380326 | F | F | F |
| 0.4999683632135756 | 0.4989588874152986 | 0.6442878065983919 | F | F | F |
| 0.7722030242013673 | 0.7372048960276700 | 0.6496441328851290 | F | F | F |
| 0.4891851419039881 | 0.7705637644234216 | 0.6496441328851290 | F | F | F |
| 0.7384831957080280 | 0.4878411963083735 | 0.6496441328851290 | F | F | F |
| 0.7621803931864536 | 0.0001144406122108 | 0.8790290626179775 | T | T | T |
| 0.9090002266315704 | 0.6487817047835416 | 0.8056920198878775 | T | T | T |
| 0.4238237155832859 | 0.6823536264414241 | 0.8000338105281829 | T | T | T |
| 0.9255240863729194 | 0.1777410097730743 | 0.7982500288261152 | T | T | T |
| 0.4030082970602070 | 0.1550803035210873 | 0.8112299250349079 | T | T | T |
| 0.2375365772718051 | 0.7471412201592839 | 0.8779352178297215 | T | T | T |
| 0.4452582325901269 | 0.9036536663976422 | 0.8047201313806560 | T | T | T |
| 0.8969697503105518 | 0.4244432959428327 | 0.7980111178377340 | T | T | T |
| 0.7590522181221419 | 0.2599027868915630 | 0.8835750496571144 | T | T | T |
| 0.8938499285913084 | 0.9264187543292824 | 0.7981058826931213 | T | T | T |
| 0.4408525478462112 | 0.4007308898057516 | 0.8100252144961329 | T | T | T |
| 0.2263574011936874 | 0.2477321524944947 | 0.8805461231126386 | T | T | T |
| 0.0024461560085977 | 0.2366124148550047 | 0.8793214585299977 | T | T | T |
| 0.6495073031391108 | 0.4434714869739887 | 0.8081268539470713 | T | T | T |
| 0.6788066776877778 | 0.8941448236765603 | 0.7978724485721749 | T | T | T |
| 0.1749774210096127 | 0.8923690595140509 | 0.7987345338234798 | T | T | T |
| 0.1581534956309356 | 0.4334927985841856 | 0.8103798946795800 | T | T | T |
| 0.5164365666335711 | 0.2244473893639639 | 0.8778820630034566 | T | T | T |
| 0.6681607535983464 | 0.6670185814517143 | 0.8019665215226621 | T | T | T |
| 0.0086089154941016 | 0.4972723420694114 | 0.8849988398722778 | T | T | T |
| 0.6685999446945198 | 0.1634922952766886 | 0.8042321683007114 | T | T | T |
| 0.4785245637282809 | 0.5347932820691609 | 0.8807092399974972 | T | T | T |
| 0.1629872546856416 | 0.1661639241179490 | 0.8037716550023285 | T | T | T |
| 0.5101694389120208 | 0.9947897014173357 | 0.8863423576438082 | T | T | T |
| 0.1654115607847061 | 0.6646987103227213 | 0.8034263485247323 | T | T | T |
| 0.2041486935827977 | 0.0074233382655739 | 0.8942054190884972 | T | T | T |
| 0.2643679503319301 | 0.5064592462707380 | 0.8766793435209373 | T | T | T |
| 0.9911222118248511 | 0.7561810427082480 | 0.8893292804171040 | T | T | T |
| 0.2277336602504292 | 0.2607128538629411 | 0.6389314702216780 | F | F | F |
| 0.5107516054408165 | 0.2273539685104495 | 0.6389314702216780 | F | F | F |
| 0.2614535057798690 | 0.5100765994651582 | 0.6389314702216780 | F | F | F |

0.0000021130779260 0.0002314344439824 0.6442877992311082 F F F  
0.7430104801071867 0.4973894768239221 0.8854993875392834 T T T  
0.7807441213221656 0.7299895850881770 0.8831158432368018 T T T  
0.5072543742110288 0.7582447875404507 0.8895382804169744 T T T  
0.9911366563555187 0.0021965781148522 0.8836051113678793 T T T  
0.8159621184411563 0.8581513196171642 0.6654559099501753 F F F  
0.3952972119514584 0.9366022075870006 0.6276595231455957 F F F  
0.9176889992569386 0.1543852969704318 0.6160765563022039 F F F  
0.1696015544058724 0.4325678957130350 0.6302162978772969 F F F  
0.3245524865666596 0.8141206723693344 0.6654559099501753 F F F  
0.6662187468277452 0.3938441150176502 0.6276595231455957 F F F  
0.9266414898463324 0.9166133831432433 0.6160765563022039 F F F  
0.3969660861330055 0.1690672319202733 0.6302162978772969 F F F  
0.8593569123797522 0.3233549040052850 0.6654559099501753 F F F  
0.9383551867246638 0.6651398428978581 0.6276595231455957 F F F  
0.1555405424342524 0.9245750032457849 0.6160765563022039 F F F  
0.4333710451824828 0.3964989024812127 0.6302162978772969 F F F  
0.1839746083192395 0.1397664555379237 0.6231196809846153 F F F  
0.6046395148089374 0.0613155675680872 0.6609160677891879 F F F  
0.0822477308365634 0.8435324815089373 0.6724990330310092 F F F  
0.8303351723545234 0.5653498794420528 0.6583592930574795 F F F  
0.6753841932572655 0.1837971027857606 0.6231196809846153 F F F  
0.3337179329961870 0.6040736601374377 0.6609160677891879 F F F  
0.0732951833242197 0.0813043953361117 0.6724990330310092 F F F  
0.6029705936909266 0.8288505432348146 0.6583592930574795 F F F  
0.1405798143202901 0.6745628242694224 0.6231196809846153 F F F  
0.0615815399753714 0.3327778853768564 0.6609160677891879 F F F  
0.8443961875860566 0.0733427183786404 0.6724990330310092 F F F  
0.5665656815175595 0.6014188257935018 0.6583592930574795 F F F  
0.5157056528974664 0.4723168025344222 0.7031710746865940 F F F  
0.9382179561018660 0.3938357985626055 0.7407554663269664 F F F  
0.4134789539146055 0.1791020841611726 0.7528988135720383 F F F  
0.1652751896643423 0.8971290675402415 0.7385849480023765 F F F  
0.0115883806741621 0.5147326163742747 0.7031710746865940 F F F  
0.6667554280548842 0.9368543259418871 0.7407554663269664 F F F  
0.4068903253506875 0.4130228565151839 0.7528988135720383 F F F  
0.9354551584237285 0.1641872661653920 0.7385849480023765 F F F  
0.4726453699615192 0.0111632294020509 0.7031710746865940 F F F  
0.3948988741132311 0.6650179164863772 0.7407554663269664 F F F  
0.1795706135457422 0.4061412956967914 0.7528988135720383 F F F  
0.8991418888258949 0.9343893682713826 0.7385849480023765 F F F  
0.1502554041553523 0.1930157623298641 0.7457436406118987 F F F  
0.7266437877272409 0.2720664091381622 0.7077767387407548 F F F  
0.2526127549163633 0.4863993494907461 0.6961638816933373 F F F

|                    |                    |                    |   |   |   |
|--------------------|--------------------|--------------------|---|---|---|
| 0.5025216625734217 | 0.7656930053037172 | 0.7101169368244840 | F | F | F |
| 0.6558603363579962 | 0.1500934214450282 | 0.7457436406118987 | F | F | F |
| 0.0011556798742944 | 0.7256778258794370 | 0.7077767387407548 | F | F | F |
| 0.2602591083369674 | 0.2519335125370645 | 0.6961638816933373 | F | F | F |
| 0.7300562656035439 | 0.5011895953132282 | 0.7101169368244840 | F | F | F |
| 0.1938240818969916 | 0.6551493419751111 | 0.7457436406118987 | F | F | F |
| 0.2721399812473635 | 0.0004733764911151 | 0.7077767387407548 | F | F | F |
| 0.4870674713351235 | 0.2598722351273111 | 0.6961638816933373 | F | F | F |
| 0.7672940286364280 | 0.7287924234005558 | 0.7101169368244840 | F | F | F |
| 0.8217615271817477 | 0.8385699437104435 | 0.9003311514030378 | T | T | T |
| 0.8506651196450035 | 0.8043901346123912 | 0.7824565789511333 | T | T | T |
| 0.2654919174772101 | 0.7297425643513956 | 0.8185096268953999 | T | T | T |
| 0.2738308494495321 | 0.8878288123267895 | 0.9372704928014732 | T | T | T |
| 0.7480765774628965 | 0.5149543205108333 | 0.8319721066989004 | T | T | T |
| 0.9106115928242249 | 0.1511433627224250 | 0.8564491991321005 | T | T | T |
| 0.5003675380517411 | 0.2273029872070878 | 0.8184865272195275 | T | T | T |
| 0.1800808237417827 | 0.4237037317968823 | 0.8727336276266677 | T | T | T |
| 0.4005404056151715 | 0.7093756487397563 | 0.8757236824515369 | T | T | T |
| 0.3434603787917676 | 0.8499439666570746 | 0.7836953400415052 | T | T | T |
| 0.9951950999284279 | 0.2690922993857754 | 0.8207050518590439 | T | T | T |
| 0.6494596215933550 | 0.4212253755931360 | 0.8679265060071025 | T | T | T |
| 0.7427491933677738 | 0.7455379810443422 | 0.8299245861456579 | T | T | T |
| 0.9306269553545078 | 0.9184038743087958 | 0.8567706506968648 | T | T | T |
| 0.2699541154301285 | 0.4934198896272894 | 0.8178870050515435 | T | T | T |
| 0.3953847661175086 | 0.1733395213824871 | 0.8722250113764244 | T | T | T |
| 0.8431731620813770 | 0.3454230823622303 | 0.8986228052350197 | T | T | T |
| 0.8031029741360851 | 0.3458430673843795 | 0.7832518044734947 | T | T | T |
| 0.7304453470552569 | 0.9958485176517758 | 0.8208866921446439 | T | T | T |
| 0.9354866712479825 | 0.6608472633616679 | 0.8616839066229746 | T | T | T |
| 0.5202917009861329 | 0.7521186521013548 | 0.8333917833510289 | T | T | T |
| 0.1485288555101255 | 0.9195261277515600 | 0.8597939548451744 | T | T | T |
| 0.2321228787683959 | 0.2643688234705177 | 0.8197619762574200 | T | T | T |
| 0.4400954097796611 | 0.3946896357244054 | 0.8702372770730704 | T | T | T |
| 0.4770757471826911 | 0.5283515657108736 | 0.8223350571499516 | T | T | T |
| 0.1738003389635286 | 0.1364382917167555 | 0.8606306105792766 | T | T | T |
| 0.6058619779145104 | 0.0600215809302864 | 0.8982938473752692 | T | T | T |
| 0.0648407253626311 | 0.5999677530029132 | 0.7871039769320719 | T | T | T |
| 0.0754807960633505 | 0.8413582320499025 | 0.9125282761626116 | T | T | T |
| 0.5895807708428963 | 0.8199493247985502 | 0.7745312869709464 | T | T | T |
| 0.8310684740630252 | 0.5719909995437241 | 0.8969959683527529 | T | T | T |
| 0.8360291062838796 | 0.0985742317035360 | 0.7896982864865008 | T | T | T |
| 0.9951061933577654 | 0.4769170376636484 | 0.8250740494223686 | T | T | T |
| 0.6846971693292461 | 0.1768432601530046 | 0.8625708776033492 | T | T | T |
| 0.3234128035367564 | 0.5916798464221332 | 0.9043004480054174 | T | T | T |

|                    |                    |                    |   |   |   |
|--------------------|--------------------|--------------------|---|---|---|
| 0.3328427074548180 | 0.0608913209352491 | 0.7881261922007682 | T | T | T |
| 0.0444788672801539 | 0.0884366808848360 | 0.9116398821829109 | T | T | T |
| 0.5891894731448735 | 0.5907592470544853 | 0.7766638660971401 | T | T | T |
| 0.6284767206563338 | 0.8023588911205511 | 0.8963780934342271 | T | T | T |
| 0.0616412724524987 | 0.8352407585487769 | 0.7898871298353104 | T | T | T |
| 0.5238550501380960 | 0.9859204322127305 | 0.8269953543754760 | T | T | T |
| 0.1387828566816859 | 0.6761584248946725 | 0.8615200062267783 | T | T | T |
| 0.0641572955056990 | 0.3346303525557875 | 0.8990422170113883 | T | T | T |
| 0.6056368436338189 | 0.3310609628350011 | 0.7883098332664964 | T | T | T |
| 0.8622416423434539 | 0.0326421990205296 | 0.9164902038454641 | T | T | T |
| 0.8223130411724545 | 0.5887295906959042 | 0.7753452797089213 | T | T | T |
| 0.5975974284354849 | 0.6012962471990019 | 0.9038067896932840 | T | T | T |
| 0.0988132574734189 | 0.0611039340279860 | 0.7903934256311455 | T | T | T |
| 0.7271565191277183 | 0.2328945893375618 | 0.9370522994607384 | T | T | T |
| 0.0373679786669129 | 0.6079545609486772 | 0.9214359922750091 | T | T | T |
| 0.2710366348609171 | 0.1131580176466091 | 0.9255915160726329 | T | T | T |
| 0.5463257896702165 | 0.2362949808070119 | 0.9376104424847983 | T | T | T |
| 0.8234220004638714 | 0.1002695240813826 | 0.9300297628875772 | T | T | T |
| 0.7465136152220488 | 0.2705004069322365 | 0.9539736380443830 | T | T | T |
| 0.0407590289641385 | 0.6031651649064743 | 0.9471874975202726 | T | T | T |
| 0.2541388587952838 | 0.1330386518596834 | 0.9504280248237252 | T | T | T |
| 0.6126431076408213 | 0.2422850267756745 | 0.9398238273909731 | T | T | T |
| 0.5729674640891386 | 0.1600280614056407 | 0.9398557328977354 | T | T | T |
| 0.0821259999947634 | 0.8460985710476362 | 0.9381589975314788 | T | T | T |
| 0.2423530844837821 | 0.9243170974590863 | 0.9594857114191711 | T | T | T |
| 0.3922297430996831 | 0.9377639307825241 | 0.9174633586863064 | T | T | T |

---

**Pt- dimer on 4-H<sub>2</sub>O Indium Tin Oxide ( In order of increasing energy as shown in the SI)**

Best:

In Sn O H Pt

1.0000000000000000

14.6581653332033461 0.0000000000000000 0.0000000000000000

7.3189795989957736 12.7095316657975506 0.0000000000000000

-0.0098891034462902 -0.0168642175486257 40.7150080587397056

In Sn O H Pt

56 8 100 8 2

Selective dynamics

Direct

0.7601349935483341 0.0112866708403061 0.5918531410996906 F F F

0.2398005729400836 0.9865051109549157 0.6017764636764795 F F F

0.7715603559583855 0.2384139429726346 0.6017764636764795 F F F

|                    |                    |                    |   |   |   |
|--------------------|--------------------|--------------------|---|---|---|
| 0.0114268733050125 | 0.2272915081485820 | 0.5918531410996906 | F | F | F |
| 0.9885086931615774 | 0.7705002566899140 | 0.6017764636764795 | F | F | F |
| 0.9992919115864609 | 0.4988958957209277 | 0.5968148104735604 | F | F | F |
| 0.5006098840390578 | 0.9976233181009846 | 0.5968148104735604 | F | F | F |
| 0.5711043620742373 | 0.3214348071932136 | 0.6764094578794229 | F | F | F |
| 0.0957719058947717 | 0.3440036600702783 | 0.6660934968337102 | F | F | F |
| 0.5954019937975659 | 0.8430639723824385 | 0.6655074568595296 | F | F | F |
| 0.0723475322885747 | 0.8195753582731911 | 0.6762296929858138 | F | F | F |
| 0.1070666233261974 | 0.5701979513442836 | 0.6764094578794229 | F | F | F |
| 0.5592180347479143 | 0.0954016151292763 | 0.6660934968337102 | F | F | F |
| 0.5598628473855953 | 0.5937927154449980 | 0.6655074568595296 | F | F | F |
| 0.1070860006085610 | 0.0713965204527511 | 0.6762296929858138 | F | F | F |
| 0.3217667286895107 | 0.1063948538379904 | 0.6764094578794229 | F | F | F |
| 0.3449476936971578 | 0.5586136025625876 | 0.6660934968337102 | F | F | F |
| 0.8446052735651364 | 0.5586165843726363 | 0.6655074568595296 | F | F | F |
| 0.8205041798030877 | 0.1070555814410454 | 0.6762296929858138 | F | F | F |
| 0.3340693408528068 | 0.8314541999090395 | 0.6708986946754578 | F | F | F |
| 0.8324697289757523 | 0.3327887986669182 | 0.6708986946754578 | F | F | F |
| 0.3333125585262877 | 0.3326744648184672 | 0.6714279094491360 | F | F | F |
| 0.8333310865980224 | 0.8312348384317403 | 0.6708986946754578 | F | F | F |
| 0.2283751935530205 | 0.7593778388225871 | 0.5918531410996906 | F | F | F |
| 0.4999677880772424 | 0.4988958957209277 | 0.5968148104735604 | F | F | F |
| 0.7722024442836002 | 0.7371413806479694 | 0.6017764670886834 | F | F | F |
| 0.4891845619862210 | 0.7705002490437209 | 0.6017764670886834 | F | F | F |
| 0.7384826157902609 | 0.4877776809286729 | 0.6017764670886834 | F | F | F |
| 0.7575009127536939 | 0.0038629644919239 | 0.8129218950940178 | T | T | T |
| 0.9084057795807334 | 0.6505411053306769 | 0.7473304351169955 | T | T | T |
| 0.4251478834174506 | 0.6769662373418884 | 0.7397373878415173 | T | T | T |
| 0.9285120184228731 | 0.1765572884660263 | 0.7398278341857538 | T | T | T |
| 0.4039078479105720 | 0.1549000956681368 | 0.7503975244919814 | T | T | T |
| 0.2225871567091864 | 0.7650696237768200 | 0.8164230472648349 | T | T | T |
| 0.4416414850250613 | 0.9034433127570619 | 0.7484749883486647 | T | T | T |
| 0.8966233573457698 | 0.4263391200568653 | 0.7395071833955800 | T | T | T |
| 0.7729909724423606 | 0.2435269979752466 | 0.8239518333507269 | T | T | T |
| 0.8929004839766388 | 0.9274377092759167 | 0.7391955847443725 | T | T | T |
| 0.4390752037286947 | 0.4015490042938339 | 0.7501385642221454 | T | T | T |
| 0.2279675578366074 | 0.2474045816981460 | 0.8147796136674906 | T | T | T |
| 0.0086954928433182 | 0.2385907125350416 | 0.8130391198592924 | T | T | T |
| 0.6549764948804466 | 0.4388071399768297 | 0.7487756009721988 | T | T | T |
| 0.6778725007748470 | 0.8930983545233061 | 0.7384668846077507 | T | T | T |
| 0.1778671144531019 | 0.8924440501533070 | 0.7398778177171955 | T | T | T |
| 0.1581905481540890 | 0.4358373680736061 | 0.7507827408208589 | T | T | T |
| 0.5160233703423220 | 0.2210473018858035 | 0.8140351791630392 | T | T | T |
| 0.6667589500716845 | 0.6641017156352058 | 0.7437593128832247 | T | T | T |



|                    |                    |                    |   |   |   |
|--------------------|--------------------|--------------------|---|---|---|
| 0.0088865460334995 | 0.5039633076773984 | 0.8198096861323446 | T | T | T |
| 0.6680912139128126 | 0.1652529587371151 | 0.7453545166008945 | T | T | T |
| 0.5097040925049184 | 0.4829311029172323 | 0.8167414106581473 | T | T | T |
| 0.1654071349572291 | 0.1650899333073181 | 0.7441911332964212 | T | T | T |
| 0.5087953942692537 | 0.9949675731729575 | 0.8170250832134713 | T | T | T |
| 0.1664924222665710 | 0.6675157039119246 | 0.7446291501031472 | T | T | T |
| 0.2478419828104705 | 0.9887908728874069 | 0.8239353904561819 | T | T | T |
| 0.2559582001167262 | 0.5175684428011353 | 0.8125261928968455 | T | T | T |
| 0.9899875426750457 | 0.7650508145407339 | 0.8249462391440098 | T | T | T |
| 0.2277330898955299 | 0.2606503858548734 | 0.5918531445119086 | F | F | F |
| 0.5107510350859172 | 0.2272915005023819 | 0.5918531445119086 | F | F | F |
| 0.2614529354249697 | 0.5100141314570905 | 0.5918531445119086 | F | F | F |
| 0.0000015379415927 | 0.0001684427503292 | 0.5968148036491172 | F | F | F |
| 0.7487545908335357 | 0.4956964088196375 | 0.8233697855509362 | T | T | T |
| 0.7744146477371217 | 0.7382901503971467 | 0.8190484058278981 | T | T | T |
| 0.4943187892991977 | 0.7683534055168719 | 0.8214677492194374 | T | T | T |
| 0.0024232528717142 | 0.9924368640826285 | 0.8175926217552971 | T | T | T |
| 0.8159615244086851 | 0.8580862583279867 | 0.6164231865138845 | F | F | F |
| 0.3952966516586898 | 0.9365408416315262 | 0.5814117472217859 | F | F | F |
| 0.9176884493039310 | 0.1543250634757953 | 0.5706822470037736 | F | F | F |
| 0.1696009918307482 | 0.4325062797829844 | 0.5837801313682718 | F | F | F |
| 0.3245518925341884 | 0.8140556110801569 | 0.6164231865138845 | F | F | F |
| 0.6662181865349766 | 0.3937827490621757 | 0.5814117472217859 | F | F | F |
| 0.9266409398933249 | 0.9165531496486068 | 0.5706822470037736 | F | F | F |
| 0.3969655235578813 | 0.1690056159902227 | 0.5837801313682718 | F | F | F |
| 0.8593563183472810 | 0.3232898427161075 | 0.6164231865138845 | F | F | F |
| 0.9383546264318952 | 0.6650784769423836 | 0.5814117472217859 | F | F | F |
| 0.1555399924812448 | 0.9245147697511484 | 0.5706822470037736 | F | F | F |
| 0.4333704826073586 | 0.3964372865511621 | 0.5837801313682718 | F | F | F |
| 0.1839740520790443 | 0.1397055334405266 | 0.5772064138115667 | F | F | F |
| 0.6046389248290538 | 0.0612509501369871 | 0.6122178531036582 | F | F | F |
| 0.0822471305169117 | 0.8434667316171627 | 0.6229473518381141 | F | F | F |
| 0.8303345846569883 | 0.5652855119855289 | 0.6098494689571652 | F | F | F |
| 0.6753836370170703 | 0.1837361806883635 | 0.5772064138115667 | F | F | F |
| 0.3337173430163034 | 0.6040090427063376 | 0.6122178531036582 | F | F | F |
| 0.0732945830045679 | 0.0812386454443370 | 0.6229473518381141 | F | F | F |
| 0.6029700059933987 | 0.8287861757782906 | 0.6098494689571652 | F | F | F |
| 0.1405792580800949 | 0.6745019021720253 | 0.5772064138115667 | F | F | F |
| 0.0615809499954878 | 0.3327132679457563 | 0.6122178531036582 | F | F | F |
| 0.8443955872664048 | 0.0732769684868657 | 0.6229473518381141 | F | F | F |
| 0.5665650938200315 | 0.6013544583369779 | 0.6098494689571652 | F | F | F |
| 0.5157050251978106 | 0.4722480538525815 | 0.6513593884156137 | F | F | F |
| 0.9382172948517464 | 0.3937633752737284 | 0.6861744529626890 | F | F | F |
| 0.4134782818244815 | 0.1790284736233474 | 0.6974230431274506 | F | F | F |

|                    |                    |                    |   |   |   |
|--------------------|--------------------|--------------------|---|---|---|
| 0.1652745303517804 | 0.8970568564618375 | 0.6841638647298254 | F | F | F |
| 0.0115877529745063 | 0.5146638676924340 | 0.6513593884156137 | F | F | F |
| 0.6667547668047646 | 0.9367819026530100 | 0.6861744529626890 | F | F | F |
| 0.4068896532605635 | 0.4129492459773587 | 0.6974230431274506 | F | F | F |
| 0.9354544991111666 | 0.1641150550869881 | 0.6841638647298254 | F | F | F |
| 0.4726447422618634 | 0.0110944807202102 | 0.6513593884156137 | F | F | F |
| 0.3948982128631116 | 0.6649454931975001 | 0.6861744529626890 | F | F | F |
| 0.1795699414556182 | 0.4060676851589662 | 0.6974230431274506 | F | F | F |
| 0.8991412295133330 | 0.9343171571929787 | 0.6841638647298254 | F | F | F |
| 0.1502547384524391 | 0.1929428513496916 | 0.6907950840843355 | F | F | F |
| 0.7266431559162427 | 0.2719972101628656 | 0.6556256937708298 | F | F | F |
| 0.2526121334718141 | 0.4863312858986362 | 0.6448685057457979 | F | F | F |
| 0.5025210286733994 | 0.7656235775284301 | 0.6577934592655481 | F | F | F |
| 0.6558596706550830 | 0.1500205104648558 | 0.6907950840843355 | F | F | F |
| 0.0011550480632962 | 0.7256086269041404 | 0.6556256937708298 | F | F | F |
| 0.2602584868924183 | 0.2518654489449546 | 0.6448685057457979 | F | F | F |
| 0.7300556317035216 | 0.5011201675379411 | 0.6577934592655481 | F | F | F |
| 0.1938234161940784 | 0.6550764309949457 | 0.6907950840843355 | F | F | F |
| 0.2721393494363653 | 0.0004041775158186 | 0.6556256937708298 | F | F | F |
| 0.4870668498905744 | 0.2598041715352011 | 0.6448685057457979 | F | F | F |
| 0.7672933947364058 | 0.7287229956252688 | 0.6577934592655481 | F | F | F |
| 0.8167002687826644 | 0.8457446611549347 | 0.8355744716945095 | T | T | T |
| 0.8498095848637600 | 0.8044870043343570 | 0.7248633774027319 | T | T | T |
| 0.2709157319285265 | 0.7297833973883490 | 0.7617541705800126 | T | T | T |
| 0.4104115437625713 | 0.9270886962084399 | 0.8033601405173542 | T | T | T |
| 0.7506106370783628 | 0.5128469994469779 | 0.7722573060193467 | T | T | T |
| 0.9273761237856285 | 0.1452415873677829 | 0.7958741472289776 | T | T | T |
| 0.4992921108535602 | 0.2297170007509793 | 0.7589689354720808 | T | T | T |
| 0.1802498446337272 | 0.4268375673718993 | 0.8078559006343045 | T | T | T |
| 0.3304331313632095 | 0.8200962482805748 | 0.8334414307528154 | T | T | T |
| 0.3442355986947749 | 0.8480291641347338 | 0.7254832282780442 | T | T | T |
| 0.9977449823653405 | 0.2704760246849007 | 0.7593520830359948 | T | T | T |
| 0.6700090658252796 | 0.3949878012490506 | 0.8007359915950900 | T | T | T |
| 0.7372399847142752 | 0.7471686416280828 | 0.7699860245584005 | T | T | T |
| 0.9220226984293747 | 0.9267350283910173 | 0.7930814958108480 | T | T | T |
| 0.2696458888830703 | 0.4978613614877982 | 0.7578143260931336 | T | T | T |
| 0.3969149741065665 | 0.1676215526792878 | 0.8071922462531416 | T | T | T |
| 0.8536012933684893 | 0.3388482848925390 | 0.8331295069427294 | T | T | T |
| 0.8063175771146198 | 0.3437497734915848 | 0.7254208708493007 | T | T | T |
| 0.7282368814051160 | 0.9977337489835585 | 0.7592193248916701 | T | T | T |
| 0.9310547161342775 | 0.6717666546541873 | 0.7986723832944062 | T | T | T |
| 0.5134946103622988 | 0.7363405052663212 | 0.7713008584593148 | T | T | T |
| 0.1470992831700605 | 0.9315459888986041 | 0.7935712026211063 | T | T | T |
| 0.2331905115591409 | 0.2656304285286321 | 0.7592257508126309 | T | T | T |

|                    |                    |                    |   |   |   |
|--------------------|--------------------|--------------------|---|---|---|
| 0.4297061102118142 | 0.3944985080210944 | 0.8065978140497452 | T | T | T |
| 0.4808098224815493 | 0.5251641663386244 | 0.7647673138682740 | T | T | T |
| 0.1745969529291811 | 0.1348600266828198 | 0.7970351953142590 | T | T | T |
| 0.6036426548670930 | 0.0578756830549415 | 0.8329458848675508 | T | T | T |
| 0.0648933844042851 | 0.6018474426906241 | 0.7293031888433373 | T | T | T |
| 0.0684342288376108 | 0.8527285569950024 | 0.8435280781871394 | T | T | T |
| 0.5866068896208320 | 0.8172203040819551 | 0.7183588657360748 | T | T | T |
| 0.8352044144833830 | 0.5784195507457176 | 0.8312499334257580 | T | T | T |
| 0.8362942990266395 | 0.1001492978670297 | 0.7320442512786300 | T | T | T |
| 0.9945576758898981 | 0.4801552803299778 | 0.7648344636589365 | T | T | T |
| 0.6850352387855961 | 0.1763701179108427 | 0.7997201983249721 | T | T | T |
| 0.2883146588936462 | 0.6164308414269923 | 0.8449847011192376 | T | T | T |
| 0.3330162783370688 | 0.0603502430103070 | 0.7297610583530377 | T | T | T |
| 0.0759012922609156 | 0.0697789325858244 | 0.8465650278493655 | T | T | T |
| 0.5911495118365256 | 0.5850598156260685 | 0.7191430326613389 | T | T | T |
| 0.6112351886717737 | 0.8226455206611871 | 0.8299150047869192 | T | T | T |
| 0.0629256585317704 | 0.8360103699175790 | 0.7318409804960215 | T | T | T |
| 0.5267235757129587 | 0.9896444817711130 | 0.7629909196306273 | T | T | T |
| 0.1370771889416872 | 0.6805742234983266 | 0.7975828569035479 | T | T | T |
| 0.0680086253335425 | 0.3369597626379655 | 0.8325217634492963 | T | T | T |
| 0.6040342714949184 | 0.3320110207372911 | 0.7299345424601384 | T | T | T |
| 0.8556650390005547 | 0.0690165063063351 | 0.8457581984843111 | T | T | T |
| 0.8213380797818395 | 0.5899037444651087 | 0.7186298310424460 | T | T | T |
| 0.5650399788787591 | 0.4966285371151221 | 0.8942106250031153 | T | T | T |
| 0.0997619454736013 | 0.0617843836731492 | 0.7314093499059031 | T | T | T |
| 0.6810963564575861 | 0.2812915634351462 | 0.8683976983087214 | T | T | T |
| 0.0404856221020167 | 0.6123944956477505 | 0.8527575717728832 | T | T | T |
| 0.2971614913244223 | 0.0889071248826310 | 0.8520254556649178 | T | T | T |
| 0.5300282273538466 | 0.2499165514745820 | 0.8674216479041267 | T | T | T |
| 0.8575130144345338 | 0.0623582382561247 | 0.8696403067907518 | T | T | T |
| 0.6618157536427579 | 0.3481715694903523 | 0.8793622066658898 | T | T | T |
| 0.0561738590200421 | 0.6021687088271190 | 0.8761393342520489 | T | T | T |
| 0.2821621308831276 | 0.0998153871764289 | 0.8754768873664455 | T | T | T |
| 0.5961309440044775 | 0.2656530317034806 | 0.8690396042401832 | T | T | T |
| 0.5589408690407469 | 0.1769981392645849 | 0.8747438962522059 | T | T | T |
| 0.0682493139614002 | 0.0708008360690962 | 0.8704107399677294 | T | T | T |
| 0.5626919795606302 | 0.5297751846695403 | 0.9152277158766960 | T | T | T |
| 0.4180274021401129 | 0.5626152335923537 | 0.8715021602167778 | T | T | T |
| 0.5733477610705133 | 0.5965200245138591 | 0.8544603950296907 | T | T | T |

Best + 1

In Sn O H Pt

1.00000000000000

14.6581653332033461 0.0000000000000000 0.0000000000000000  
7.3189795989957736 12.7095316657975506 0.0000000000000000  
-0.0098891034462902 -0.0168642175486257 51.7150080587397056

In Sn O H Pt  
56 8 100 8 2

Selective dynamics

Direct

|                    |                    |                    |   |   |   |
|--------------------|--------------------|--------------------|---|---|---|
| 0.7601334683925316 | 0.0111196284508281 | 0.4659634855339050 | F | F | F |
| 0.2397990222127078 | 0.9863352678444528 | 0.4737760756088107 | F | F | F |
| 0.7715588052310096 | 0.2382440998621718 | 0.4737760756088107 | F | F | F |
| 0.0114253481492099 | 0.2271244657591041 | 0.4659634855339050 | F | F | F |
| 0.9885071424342016 | 0.7703304135794511 | 0.4737760756088107 | F | F | F |
| 0.9992903736448469 | 0.4987274529686729 | 0.4698697869370179 | F | F | F |
| 0.5006083460974438 | 0.9974548753487298 | 0.4698697869370179 | F | F | F |
| 0.5711026190239110 | 0.3212438999490672 | 0.5325343176450374 | F | F | F |
| 0.0957701894278102 | 0.3438156643639090 | 0.5244126049570497 | F | F | F |
| 0.5954002788407777 | 0.8428761420777775 | 0.5239512181533499 | F | F | F |
| 0.0723457897014868 | 0.8193845017652066 | 0.5323927895013369 | F | F | F |
| 0.1070648802758711 | 0.5700070441001301 | 0.5325343176450374 | F | F | F |
| 0.5592163182809529 | 0.0952136194229070 | 0.5244126049570497 | F | F | F |
| 0.5598611324288072 | 0.5936048851403370 | 0.5239512181533499 | F | F | F |
| 0.1070842580214730 | 0.0712056639447667 | 0.5323927895013369 | F | F | F |
| 0.3217649856391844 | 0.1062039465938440 | 0.5325343176450374 | F | F | F |
| 0.3449459772301964 | 0.5584256068562183 | 0.5244126049570497 | F | F | F |
| 0.8446035586083482 | 0.5584287540679753 | 0.5239512181533499 | F | F | F |
| 0.8205024372159997 | 0.1068647249330610 | 0.5323927895013369 | F | F | F |
| 0.3340676120032526 | 0.8312648480018296 | 0.5281957169818696 | F | F | F |
| 0.8324680001261981 | 0.3325994467597084 | 0.5281957169818696 | F | F | F |
| 0.3333108283129889 | 0.3324849635476852 | 0.5286123655445181 | F | F | F |
| 0.8333293577484682 | 0.8310454865245305 | 0.5281957169818696 | F | F | F |
| 0.2283736683972180 | 0.7592107964331092 | 0.4659634855339050 | F | F | F |
| 0.4999662501356283 | 0.4987274529686729 | 0.4698697869370179 | F | F | F |
| 0.7722008935562172 | 0.7369715375365402 | 0.4737760782952236 | F | F | F |
| 0.4891830112588380 | 0.7703304059322917 | 0.4737760782952236 | F | F | F |
| 0.7384810650628779 | 0.4876078378172437 | 0.4737760782952236 | F | F | F |
| 0.7588914308244885 | 0.0031411894414361 | 0.6412433899536347 | T | T | T |
| 0.9057484205485483 | 0.6494149160474433 | 0.5879295950795057 | T | T | T |
| 0.4258935142330636 | 0.6735523830114121 | 0.5828748485291758 | T | T | T |
| 0.9277418500054937 | 0.1769668489050760 | 0.5817893751830521 | T | T | T |
| 0.4043985412478752 | 0.1563513868465210 | 0.5910588832376286 | T | T | T |
| 0.2277236274459792 | 0.7625582903475486 | 0.6404015385136180 | T | T | T |
| 0.4397827214887895 | 0.9040971342735000 | 0.5896829273118992 | T | T | T |
| 0.8938151813426316 | 0.4265756881353597 | 0.5820136701020507 | T | T | T |
| 0.7744530031412423 | 0.2469954334368279 | 0.6453985254928173 | T | T | T |

|                    |                    |                    |   |   |   |
|--------------------|--------------------|--------------------|---|---|---|
| 0.8926083353245260 | 0.9263677255622274 | 0.5819853353151460 | T | T | T |
| 0.4363516262242160 | 0.4045172487764453 | 0.5907086733914688 | T | T | T |
| 0.2282718439286612 | 0.2496002014410106 | 0.6416244148274323 | T | T | T |
| 0.0109488895290121 | 0.2388865617284431 | 0.6388589130933294 | T | T | T |
| 0.6493410802830897 | 0.4413317589544397 | 0.5904712485313912 | T | T | T |
| 0.6773586203080965 | 0.8935349578064021 | 0.5815188576178817 | T | T | T |
| 0.1767888760746885 | 0.8931607194937398 | 0.5821871691857212 | T | T | T |
| 0.1569274310539237 | 0.4361228297930498 | 0.5909030013765625 | T | T | T |
| 0.5179039500873819 | 0.2240312419363571 | 0.6417944697357646 | T | T | T |
| 0.6632912850231860 | 0.6659351283407484 | 0.5858005048450072 | T | T | T |
| 0.0072690733928843 | 0.5016138412109695 | 0.6449025303278840 | T | T | T |
| 0.6678765655969354 | 0.1640439730586484 | 0.5866601913678332 | T | T | T |
| 0.5103169554245189 | 0.4555753231083027 | 0.6496852898439298 | T | T | T |
| 0.1663946780134722 | 0.1651685453781495 | 0.5855293812535231 | T | T | T |
| 0.5098327115154272 | 0.9971705891362521 | 0.6430170338181368 | T | T | T |
| 0.1634361195956641 | 0.6681746914715165 | 0.5856420734565206 | T | T | T |
| 0.2421442630455077 | 0.9981673370710998 | 0.6504414031311089 | T | T | T |
| 0.2484489233586940 | 0.5235072315558275 | 0.6397897855146202 | T | T | T |
| 0.9844056138560922 | 0.7610112434960618 | 0.6477010062212365 | T | T | T |
| 0.2277315647397131 | 0.2604833434644362 | 0.4659634882203321 | F | F | F |
| 0.5107495099301005 | 0.2271244581119447 | 0.4659634882203321 | F | F | F |
| 0.2614514102691530 | 0.5098470890666533 | 0.4659634882203321 | F | F | F |
| 0.0000000000000000 | 0.0000000000000000 | 0.4698697815641637 | F | F | F |
| 0.7512352499380344 | 0.4902148165002504 | 0.6481127686382092 | T | T | T |
| 0.7686036814038167 | 0.7374516078072498 | 0.6449144301777350 | T | T | T |
| 0.4840789600145766 | 0.7754883880354436 | 0.6478444104770804 | T | T | T |
| 0.9954990892121680 | 0.9966297922491287 | 0.6431972550939694 | T | T | T |
| 0.8159599359379399 | 0.8579122813819282 | 0.4853073788173816 | F | F | F |
| 0.3952951534094780 | 0.9363767461815229 | 0.4577430201053687 | F | F | F |
| 0.9176869787037418 | 0.1541639962793013 | 0.4492957297685578 | F | F | F |
| 0.1695994874784077 | 0.4323415158892061 | 0.4596076389699917 | F | F | F |
| 0.3245503040634432 | 0.8138816341340984 | 0.4853073788173816 | F | F | F |
| 0.6662166882857647 | 0.3936186536121724 | 0.4577430201053687 | F | F | F |
| 0.9266394692931357 | 0.9163920824521128 | 0.4492957297685578 | F | F | F |
| 0.3969640192055408 | 0.1688408520964444 | 0.4596076389699917 | F | F | F |
| 0.8593547298765358 | 0.3231158657700490 | 0.4853073788173816 | F | F | F |
| 0.9383531281826833 | 0.6649143814923804 | 0.4577430201053687 | F | F | F |
| 0.1555385218810557 | 0.9243537025546544 | 0.4492957297685578 | F | F | F |
| 0.4333689782550181 | 0.3962725226573838 | 0.4596076389699917 | F | F | F |
| 0.1839725646666253 | 0.1395426248879019 | 0.4544321788212997 | F | F | F |
| 0.6046373471950943 | 0.0610781600883072 | 0.4819965375333126 | F | F | F |
| 0.0822455252339367 | 0.8432909133153856 | 0.4904438267021192 | F | F | F |
| 0.8303330131261575 | 0.5651133903806240 | 0.4801319186686825 | F | F | F |
| 0.6753821496046513 | 0.1835732721357388 | 0.4544321788212997 | F | F | F |

|                    |                    |                    |   |   |   |
|--------------------|--------------------|--------------------|---|---|---|
| 0.3337157653823439 | 0.6038362526576577 | 0.4819965375333126 | F | F | F |
| 0.0732929777215929 | 0.0810628271425600 | 0.4904438267021192 | F | F | F |
| 0.6029684344625679 | 0.8286140541733857 | 0.4801319186686825 | F | F | F |
| 0.1405777706676758 | 0.6743389936194006 | 0.4544321788212997 | F | F | F |
| 0.0615793723615283 | 0.3325404778970764 | 0.4819965375333126 | F | F | F |
| 0.8443939819834299 | 0.0731011501850887 | 0.4904438267021192 | F | F | F |
| 0.5665635222892007 | 0.6011823367320730 | 0.4801319186686825 | F | F | F |
| 0.5157033466994037 | 0.4720642166451867 | 0.5128125034488065 | F | F | F |
| 0.9382155266378476 | 0.3935697119943384 | 0.5402222571510507 | F | F | F |
| 0.4134764846239136 | 0.1788316355844657 | 0.5490782248169097 | F | F | F |
| 0.1652727673189958 | 0.8968637606432637 | 0.5386393295024519 | F | F | F |
| 0.0115860744760994 | 0.5144800304850392 | 0.5128125034488065 | F | F | F |
| 0.6667529985908658 | 0.9365882393736200 | 0.5402222571510507 | F | F | F |
| 0.4068878560599956 | 0.4127524079384770 | 0.5490782248169097 | F | F | F |
| 0.9354527360783820 | 0.1639219592684142 | 0.5386393295024519 | F | F | F |
| 0.4726430637634564 | 0.0109106435128155 | 0.5128125034488065 | F | F | F |
| 0.3948964446492127 | 0.6647518299181101 | 0.5402222571510507 | F | F | F |
| 0.1795681442550503 | 0.4058708471200845 | 0.5490782248169097 | F | F | F |
| 0.8991394664805483 | 0.9341240613744048 | 0.5386393295024519 | F | F | F |
| 0.1502529583315635 | 0.1927478839608767 | 0.5438600605743957 | F | F | F |
| 0.7266414664239278 | 0.2718121688495998 | 0.5161713476883989 | F | F | F |
| 0.2526104716998674 | 0.4861492806533860 | 0.5077022588577265 | F | F | F |
| 0.5025193335949325 | 0.7654379243932397 | 0.5178780203333417 | F | F | F |
| 0.6558578905342074 | 0.1498255430760409 | 0.5438600605743957 | F | F | F |
| 0.0011533585709813 | 0.7254235855908746 | 0.5161713476883989 | F | F | F |
| 0.2602568251204715 | 0.2516834436997044 | 0.5077022588577265 | F | F | F |
| 0.7300539366250547 | 0.5009345144027506 | 0.5178780203333417 | F | F | F |
| 0.1938216360732028 | 0.6548814636061238 | 0.5438600605743957 | F | F | F |
| 0.2721376599440504 | 0.0002191362025528 | 0.5161713476883989 | F | F | F |
| 0.4870651881186276 | 0.2596221662899509 | 0.5077022588577265 | F | F | F |
| 0.7672916996579389 | 0.7285373424900783 | 0.5178780203333417 | F | F | F |
| 0.8148009950960006 | 0.8425128113453677 | 0.6574329154148421 | T | T | T |
| 0.8491185046248960 | 0.8039635357433590 | 0.5707139439748672 | T | T | T |
| 0.2690404261116307 | 0.7308648419838416 | 0.5987166422909674 | T | T | T |
| 0.4041780877813285 | 0.9328296634523946 | 0.6332808255974548 | T | T | T |
| 0.7477774042149585 | 0.5138499205863679 | 0.6082436331431829 | T | T | T |
| 0.9266359490858540 | 0.1454668023181026 | 0.6255071275709211 | T | T | T |
| 0.5005409020392009 | 0.2299361232855533 | 0.5980788176273784 | T | T | T |
| 0.1772032083329493 | 0.4280527866548977 | 0.6354630904443529 | T | T | T |
| 0.3168626610417687 | 0.8353796223338715 | 0.6596568303592345 | T | T | T |
| 0.3440842998359739 | 0.8469325185195198 | 0.5713427112026537 | T | T | T |
| 0.9980798453504498 | 0.2697396157446759 | 0.5969093699548500 | T | T | T |
| 0.6650768834538864 | 0.4058925225190350 | 0.6334265962332595 | T | T | T |
| 0.7351380709728623 | 0.7472103488153053 | 0.6061268014685953 | T | T | T |

|                    |                    |                    |   |   |   |
|--------------------|--------------------|--------------------|---|---|---|
| 0.9277485068096635 | 0.9179058486077737 | 0.6247234459857626 | T | T | T |
| 0.2644609842089548 | 0.5013079464514004 | 0.5962791239208783 | T | T | T |
| 0.3971612237650703 | 0.1689009485179158 | 0.6359957637860175 | T | T | T |
| 0.8577384431581102 | 0.3372080661021105 | 0.6535382409819699 | T | T | T |
| 0.8029614240328677 | 0.3452286659800810 | 0.5715810924168296 | T | T | T |
| 0.7301192910392315 | 0.9957075925496701 | 0.5985145285611024 | T | T | T |
| 0.9276242985562632 | 0.6663795438140544 | 0.6286476217095389 | T | T | T |
| 0.5100643784807352 | 0.7385528232007020 | 0.6083631119247401 | T | T | T |
| 0.1405248022236658 | 0.9293499611412606 | 0.6252574318850238 | T | T | T |
| 0.2334725668867681 | 0.2657511641888889 | 0.5977718694084672 | T | T | T |
| 0.4142093017648171 | 0.3961307300615988 | 0.6335828229288395 | T | T | T |
| 0.4811047829695140 | 0.5217968663236953 | 0.6021351912373007 | T | T | T |
| 0.1742239508846054 | 0.1354271174582582 | 0.6269747628000836 | T | T | T |
| 0.6024270894243967 | 0.0628067992947003 | 0.6557946989293890 | T | T | T |
| 0.0616095106687170 | 0.6022022805041858 | 0.5737667670676622 | T | T | T |
| 0.0709115395465187 | 0.8479030671712984 | 0.6654203097941124 | T | T | T |
| 0.5847427932862330 | 0.8190976930675652 | 0.5657617783329610 | T | T | T |
| 0.8320390954184226 | 0.5761652668409980 | 0.6549117484896405 | T | T | T |
| 0.8369357852133008 | 0.0985832801644248 | 0.5762413361749783 | T | T | T |
| 0.9931695477826251 | 0.4783701770335345 | 0.6016752074648972 | T | T | T |
| 0.6901250472975211 | 0.1749658224518248 | 0.6288228632355738 | T | T | T |
| 0.2802807185850444 | 0.6219392835959570 | 0.6657086297274334 | T | T | T |
| 0.3333591812156359 | 0.0607652753981949 | 0.5745899378512284 | T | T | T |
| 0.0678391878251579 | 0.0730026141904441 | 0.6663125250606831 | T | T | T |
| 0.5903988557294644 | 0.5861237831949544 | 0.5662966949704418 | T | T | T |
| 0.6060565759822667 | 0.8266760857428287 | 0.6530088954686846 | T | T | T |
| 0.0619630626015763 | 0.8366571486783296 | 0.5758369605564789 | T | T | T |
| 0.5259007230178075 | 0.9901905011066405 | 0.6007208705470456 | T | T | T |
| 0.1313810022161928 | 0.6877190151572752 | 0.6270560575440330 | T | T | T |
| 0.0676920658380516 | 0.3364543626511549 | 0.6554522813638702 | T | T | T |
| 0.6048382208517079 | 0.3306168870526906 | 0.5747519975238431 | T | T | T |
| 0.8658491119137796 | 0.0363259179302803 | 0.6673216845286922 | T | T | T |
| 0.8175937880905259 | 0.5902996842266484 | 0.5656899700562875 | T | T | T |
| 0.7247723744719347 | 0.4878707500244566 | 0.6939039580442030 | T | T | T |
| 0.0998984284805281 | 0.0616803018814388 | 0.5758434164432334 | T | T | T |
| 0.7597974029667705 | 0.2243280093484516 | 0.6856028602261017 | T | T | T |
| 0.0511236759590452 | 0.6090998805332977 | 0.6699757060030446 | T | T | T |
| 0.2813461062867716 | 0.1061075709931156 | 0.6718319867082311 | T | T | T |
| 0.5494008834234660 | 0.3114745264903810 | 0.6720281332003083 | T | T | T |
| 0.8342859873899202 | 0.1001967554804444 | 0.6791318302774229 | T | T | T |
| 0.7756062394265595 | 0.2716555820732737 | 0.6953962424934462 | T | T | T |
| 0.0629015120818768 | 0.6033365635565752 | 0.6885861421686641 | T | T | T |
| 0.2619042458884254 | 0.1223001577639344 | 0.6899594170997135 | T | T | T |
| 0.6187544729906549 | 0.2749813751055203 | 0.6808960298512499 | T | T | T |

|                    |                    |                    |   |   |   |
|--------------------|--------------------|--------------------|---|---|---|
| 0.0776643454895523 | 0.8516314430850270 | 0.6841119645789127 | T | T | T |
| 0.0533358345458009 | 0.0829917125495301 | 0.6848472180063240 | T | T | T |
| 0.7643095568010936 | 0.5158872771932395 | 0.7028399766360732 | T | T | T |
| 0.4125755928057361 | 0.6366960999206956 | 0.6676672255408107 | T | T | T |
| 0.5951405451355318 | 0.6156150497645985 | 0.6764854883791585 | T | T | T |

Best + 2

In Sn O H Pt

1.0000000000000000

14.6581653332033461 0.0000000000000000 0.0000000000000000

7.3189795989957736 12.7095316657975506 0.0000000000000000

-0.0098891034462902 -0.0168642175486257 51.7150080587397056

In Sn O H Pt

56 8 100 8 2

Selective dynamics

Direct

|                    |                    |                    |   |   |   |
|--------------------|--------------------|--------------------|---|---|---|
| 0.7601334683925316 | 0.0111196284508281 | 0.4659634855339050 | F | F | F |
| 0.2397990222127078 | 0.9863352678444528 | 0.4737760756088107 | F | F | F |
| 0.7715588052310096 | 0.2382440998621718 | 0.4737760756088107 | F | F | F |
| 0.0114253481492099 | 0.2271244657591041 | 0.4659634855339050 | F | F | F |
| 0.9885071424342016 | 0.7703304135794511 | 0.4737760756088107 | F | F | F |
| 0.9992903736448469 | 0.4987274529686729 | 0.4698697869370179 | F | F | F |
| 0.5006083460974438 | 0.9974548753487298 | 0.4698697869370179 | F | F | F |
| 0.5711026190239110 | 0.3212438999490672 | 0.5325343176450374 | F | F | F |
| 0.0957701894278102 | 0.3438156643639090 | 0.5244126049570497 | F | F | F |
| 0.5954002788407777 | 0.8428761420777775 | 0.5239512181533499 | F | F | F |
| 0.0723457897014868 | 0.8193845017652066 | 0.5323927895013369 | F | F | F |
| 0.1070648802758711 | 0.5700070441001301 | 0.5325343176450374 | F | F | F |
| 0.5592163182809529 | 0.0952136194229070 | 0.5244126049570497 | F | F | F |
| 0.5598611324288072 | 0.5936048851403370 | 0.5239512181533499 | F | F | F |
| 0.1070842580214730 | 0.0712056639447667 | 0.5323927895013369 | F | F | F |
| 0.3217649856391844 | 0.1062039465938440 | 0.5325343176450374 | F | F | F |
| 0.3449459772301964 | 0.5584256068562183 | 0.5244126049570497 | F | F | F |
| 0.8446035586083482 | 0.5584287540679753 | 0.5239512181533499 | F | F | F |
| 0.8205024372159997 | 0.1068647249330610 | 0.5323927895013369 | F | F | F |
| 0.3340676120032526 | 0.8312648480018296 | 0.5281957169818696 | F | F | F |
| 0.8324680001261981 | 0.3325994467597084 | 0.5281957169818696 | F | F | F |
| 0.3333108283129889 | 0.3324849635476852 | 0.5286123655445181 | F | F | F |
| 0.8333293577484682 | 0.8310454865245305 | 0.5281957169818696 | F | F | F |
| 0.2283736683972180 | 0.7592107964331092 | 0.4659634855339050 | F | F | F |
| 0.4999662501356283 | 0.4987274529686729 | 0.4698697869370179 | F | F | F |
| 0.7722008935562172 | 0.7369715375365402 | 0.4737760782952236 | F | F | F |
| 0.4891830112588380 | 0.7703304059322917 | 0.4737760782952236 | F | F | F |



|                    |                    |                    |   |   |   |
|--------------------|--------------------|--------------------|---|---|---|
| 0.7384810650628779 | 0.4876078378172437 | 0.4737760782952236 | F | F | F |
| 0.7602085168887849 | 0.0090143370656588 | 0.6416584080952373 | T | T | T |
| 0.9085780324336873 | 0.6518856702093379 | 0.5901152095408692 | T | T | T |
| 0.4255864807714074 | 0.6795013726081421 | 0.5844552544508038 | T | T | T |
| 0.9275653617342718 | 0.1780540304821066 | 0.5816794273228829 | T | T | T |
| 0.4035069929176193 | 0.1544162460851108 | 0.5908846330038510 | T | T | T |
| 0.2345587023868045 | 0.7620864975153326 | 0.6404774977993404 | T | T | T |
| 0.4413926167048830 | 0.9037281614755832 | 0.5896748968682508 | T | T | T |
| 0.8955759275550855 | 0.4262054723685600 | 0.5812671201117773 | T | T | T |
| 0.7660918160667841 | 0.2429590259323064 | 0.6491283527102116 | T | T | T |
| 0.8923531588142217 | 0.9279258800627799 | 0.5819855132212197 | T | T | T |
| 0.4406766549310002 | 0.4019885102585067 | 0.5907038044370936 | T | T | T |
| 0.2269943004328329 | 0.2462309445029155 | 0.6416221001186440 | T | T | T |
| 0.0047120541752946 | 0.2362679604318769 | 0.6393257748779994 | T | T | T |
| 0.6533498840069539 | 0.4393548916140160 | 0.5885048189003500 | T | T | T |
| 0.6795653734909777 | 0.8934562381925817 | 0.5819481061751764 | T | T | T |
| 0.1749645143253913 | 0.8944353700270063 | 0.5823301104849735 | T | T | T |
| 0.1583181865329423 | 0.4346546711292720 | 0.5908712816572537 | T | T | T |
| 0.5126551113933583 | 0.2236311857470083 | 0.6402566219680161 | T | T | T |
| 0.6695488815722732 | 0.6657830133852423 | 0.5847256182593680 | T | T | T |
| 0.9997995425830034 | 0.4882233793625453 | 0.6428542096294813 | T | T | T |
| 0.6672797417227319 | 0.1644142563554835 | 0.5866629279233053 | T | T | T |
| 0.5018508468914190 | 0.5145891425929462 | 0.6425757074167302 | T | T | T |
| 0.1660882061896199 | 0.1638815493101421 | 0.5860787427889123 | T | T | T |
| 0.5089042730662476 | 0.9898636002912753 | 0.6431206374649137 | T | T | T |
| 0.1645121619744479 | 0.6682149768973005 | 0.5860125989944118 | T | T | T |
| 0.2452752519333818 | 0.9996634726343877 | 0.6529160681086672 | T | T | T |
| 0.2592914805241407 | 0.5083410234234851 | 0.6393950598793477 | T | T | T |
| 0.9901644012476103 | 0.7672204681312518 | 0.6483324103465496 | T | T | T |
| 0.2277315647397131 | 0.2604833434644362 | 0.4659634882203321 | F | F | F |
| 0.5107495099301005 | 0.2271244581119447 | 0.4659634882203321 | F | F | F |
| 0.2614514102691530 | 0.5098470890666533 | 0.4659634882203321 | F | F | F |
| 0.0000000000000000 | 0.0000000000000000 | 0.4698697815641637 | F | F | F |
| 0.7459246678932927 | 0.4869164337862107 | 0.6451962025381746 | T | T | T |
| 0.7707855401051286 | 0.7355877687196153 | 0.6471314085106253 | T | T | T |
| 0.4912860510589094 | 0.7583871527202518 | 0.6464517380899061 | T | T | T |
| 0.9900065520961907 | 0.0063227748204080 | 0.6425577592000484 | T | T | T |
| 0.8159599359379399 | 0.8579122813819282 | 0.4853073788173816 | F | F | F |
| 0.3952951534094780 | 0.9363767461815229 | 0.4577430201053687 | F | F | F |
| 0.9176869787037418 | 0.1541639962793013 | 0.4492957297685578 | F | F | F |
| 0.1695994874784077 | 0.4323415158892061 | 0.4596076389699917 | F | F | F |
| 0.3245503040634432 | 0.8138816341340984 | 0.4853073788173816 | F | F | F |
| 0.6662166882857647 | 0.3936186536121724 | 0.4577430201053687 | F | F | F |
| 0.9266394692931357 | 0.9163920824521128 | 0.4492957297685578 | F | F | F |

|                    |                    |                    |   |   |   |
|--------------------|--------------------|--------------------|---|---|---|
| 0.3969640192055408 | 0.1688408520964444 | 0.4596076389699917 | F | F | F |
| 0.8593547298765358 | 0.3231158657700490 | 0.4853073788173816 | F | F | F |
| 0.9383531281826833 | 0.6649143814923804 | 0.4577430201053687 | F | F | F |
| 0.1555385218810557 | 0.9243537025546544 | 0.4492957297685578 | F | F | F |
| 0.4333689782550181 | 0.3962725226573838 | 0.4596076389699917 | F | F | F |
| 0.1839725646666253 | 0.1395426248879019 | 0.4544321788212997 | F | F | F |
| 0.6046373471950943 | 0.0610781600883072 | 0.4819965375333126 | F | F | F |
| 0.0822455252339367 | 0.8432909133153856 | 0.4904438267021192 | F | F | F |
| 0.8303330131261575 | 0.5651133903806240 | 0.4801319186686825 | F | F | F |
| 0.6753821496046513 | 0.1835732721357388 | 0.4544321788212997 | F | F | F |
| 0.3337157653823439 | 0.6038362526576577 | 0.4819965375333126 | F | F | F |
| 0.0732929777215929 | 0.0810628271425600 | 0.4904438267021192 | F | F | F |
| 0.6029684344625679 | 0.8286140541733857 | 0.4801319186686825 | F | F | F |
| 0.1405777706676758 | 0.6743389936194006 | 0.4544321788212997 | F | F | F |
| 0.0615793723615283 | 0.3325404778970764 | 0.4819965375333126 | F | F | F |
| 0.8443939819834299 | 0.0731011501850887 | 0.4904438267021192 | F | F | F |
| 0.5665635222892007 | 0.6011823367320730 | 0.4801319186686825 | F | F | F |
| 0.5157033466994037 | 0.4720642166451867 | 0.5128125034488065 | F | F | F |
| 0.9382155266378476 | 0.3935697119943384 | 0.5402222571510507 | F | F | F |
| 0.4134764846239136 | 0.1788316355844657 | 0.5490782248169097 | F | F | F |
| 0.1652727673189958 | 0.8968637606432637 | 0.5386393295024519 | F | F | F |
| 0.0115860744760994 | 0.5144800304850392 | 0.5128125034488065 | F | F | F |
| 0.6667529985908658 | 0.9365882393736200 | 0.5402222571510507 | F | F | F |
| 0.4068878560599956 | 0.4127524079384770 | 0.5490782248169097 | F | F | F |
| 0.9354527360783820 | 0.1639219592684142 | 0.5386393295024519 | F | F | F |
| 0.4726430637634564 | 0.0109106435128155 | 0.5128125034488065 | F | F | F |
| 0.3948964446492127 | 0.6647518299181101 | 0.5402222571510507 | F | F | F |
| 0.1795681442550503 | 0.4058708471200845 | 0.5490782248169097 | F | F | F |
| 0.8991394664805483 | 0.9341240613744048 | 0.5386393295024519 | F | F | F |
| 0.1502529583315635 | 0.1927478839608767 | 0.5438600605743957 | F | F | F |
| 0.7266414664239278 | 0.2718121688495998 | 0.5161713476883989 | F | F | F |
| 0.2526104716998674 | 0.4861492806533860 | 0.5077022588577265 | F | F | F |
| 0.5025193335949325 | 0.7654379243932397 | 0.5178780203333417 | F | F | F |
| 0.6558578905342074 | 0.1498255430760409 | 0.5438600605743957 | F | F | F |
| 0.0011533585709813 | 0.7254235855908746 | 0.5161713476883989 | F | F | F |
| 0.2602568251204715 | 0.2516834436997044 | 0.5077022588577265 | F | F | F |
| 0.7300539366250547 | 0.5009345144027506 | 0.5178780203333417 | F | F | F |
| 0.1938216360732028 | 0.6548814636061238 | 0.5438600605743957 | F | F | F |
| 0.2721376599440504 | 0.0002191362025528 | 0.5161713476883989 | F | F | F |
| 0.4870651881186276 | 0.2596221662899509 | 0.5077022588577265 | F | F | F |
| 0.7672916996579389 | 0.7285373424900783 | 0.5178780203333417 | F | F | F |
| 0.8200231944882056 | 0.8454109127949634 | 0.6565576938269149 | T | T | T |
| 0.8505285311530915 | 0.8041294847460385 | 0.5710531756146457 | T | T | T |
| 0.2635973124020049 | 0.7336352564340762 | 0.5964711675832067 | T | T | T |

|                    |                    |                    |   |   |   |
|--------------------|--------------------|--------------------|---|---|---|
| 0.4009484010236293 | 0.9279609226846265 | 0.6322908542042039 | T | T | T |
| 0.7518902273476858 | 0.5112700093496733 | 0.6062029673821173 | T | T | T |
| 0.9224765937884143 | 0.1527193870032899 | 0.6236010983476740 | T | T | T |
| 0.4957771581278798 | 0.2322242701651905 | 0.5970751834845467 | T | T | T |
| 0.1732461094549399 | 0.4261774150399669 | 0.6362189851319763 | T | T | T |
| 0.4056620843345486 | 0.6819723991895266 | 0.6338896794602168 | T | T | T |
| 0.3443008779964776 | 0.8489200737113288 | 0.5713471099888972 | T | T | T |
| 0.9987727323351535 | 0.2720323127943108 | 0.5972411349042893 | T | T | T |
| 0.6657886546306858 | 0.4033921309551481 | 0.6308928965078130 | T | T | T |
| 0.7446105606273442 | 0.7447593238967768 | 0.6073259842135545 | T | T | T |
| 0.9296611556069191 | 0.9196387363237999 | 0.6240270066091096 | T | T | T |
| 0.2687440062584902 | 0.4958619676140419 | 0.5969638636133352 | T | T | T |
| 0.3967406092899976 | 0.1662394429001074 | 0.6350970232153865 | T | T | T |
| 0.8494017552337674 | 0.3353478037963988 | 0.6568805467321633 | T | T | T |
| 0.8059995069871128 | 0.3434691722571104 | 0.5707089741012074 | T | T | T |
| 0.7300194499521012 | 0.9980657425565841 | 0.5986128586531434 | T | T | T |
| 0.9411919569462607 | 0.6556982431345306 | 0.6336298983182698 | T | T | T |
| 0.5233769544560553 | 0.7396770866385137 | 0.6067580618455188 | T | T | T |
| 0.1412629566932126 | 0.9301193088556871 | 0.6257576324502128 | T | T | T |
| 0.2322158569150015 | 0.2655912055469165 | 0.5977724684285105 | T | T | T |
| 0.4350567700512400 | 0.4016428465519344 | 0.6352657635924928 | T | T | T |
| 0.4842423551010338 | 0.5207735398419154 | 0.5991946970902786 | T | T | T |
| 0.1737033095391024 | 0.1335157561658513 | 0.6275969499301181 | T | T | T |
| 0.6019415884682372 | 0.0576745563742251 | 0.6548314277467790 | T | T | T |
| 0.0640182901387680 | 0.6015839928508533 | 0.5747472418769710 | T | T | T |
| 0.0578867649117699 | 0.8669705791370282 | 0.6658345668234140 | T | T | T |
| 0.5884716520486194 | 0.8204463500257969 | 0.5655062160327826 | T | T | T |
| 0.8276815938161363 | 0.5674876086454936 | 0.6542621353044377 | T | T | T |
| 0.8358406920775548 | 0.0999281405005229 | 0.5759931997447201 | T | T | T |
| 0.9937936368470925 | 0.4784988651695181 | 0.6007634037875549 | T | T | T |
| 0.6756292597610222 | 0.1839911338393681 | 0.6288184022640599 | T | T | T |
| 0.4209779570375971 | 0.5478946821811750 | 0.6808615930043516 | T | T | T |
| 0.3330595088391280 | 0.0610268593750865 | 0.5744575459684699 | T | T | T |
| 0.0599014438772255 | 0.0862256569446057 | 0.6655918584054358 | T | T | T |
| 0.5917785713175255 | 0.5874778588847738 | 0.5658614623476923 | T | T | T |
| 0.6017528614914450 | 0.8157882068628668 | 0.6541313144465082 | T | T | T |
| 0.0604614828828873 | 0.8368873362634949 | 0.5756319351914677 | T | T | T |
| 0.5269873523370370 | 0.9889206257139326 | 0.6008996175538658 | T | T | T |
| 0.1408034181473518 | 0.6844711316998585 | 0.6283189746198089 | T | T | T |
| 0.0653518795769958 | 0.3299626231439155 | 0.6559518020030367 | T | T | T |
| 0.6066833782767572 | 0.3287504258100493 | 0.5741864827765805 | T | T | T |
| 0.8500709786468165 | 0.0759920088988436 | 0.6627458469812245 | T | T | T |
| 0.8239075337227384 | 0.5912007329242899 | 0.5656151318763821 | T | T | T |
| 0.5981810191831345 | 0.5957001232052977 | 0.6564399825947577 | T | T | T |

|                    |                    |                    |   |   |   |
|--------------------|--------------------|--------------------|---|---|---|
| 0.0992365102422195 | 0.0622995742033182 | 0.5757429678577924 | T | T | T |
| 0.6518596180674532 | 0.3124095042886065 | 0.6809327250626133 | T | T | T |
| 0.1001840439983929 | 0.6633248146667939 | 0.6807910221926388 | T | T | T |
| 0.2841175965451851 | 0.1145806783766620 | 0.6720632898297996 | T | T | T |
| 0.5228964949341893 | 0.2494268060961219 | 0.6829698648368693 | T | T | T |
| 0.6850960286638649 | 0.3131683064422723 | 0.6971459087802097 | T | T | T |
| 0.0761844173459369 | 0.6681417668915367 | 0.6985531703134085 | T | T | T |
| 0.2624314331287919 | 0.1330690767073297 | 0.6899878974938923 | T | T | T |
| 0.5815738135191598 | 0.2735764548952730 | 0.6837829855202994 | T | T | T |
| 0.5586541176941832 | 0.1743941440276006 | 0.6874330722952593 | T | T | T |
| 0.0617329382647092 | 0.8700278611786503 | 0.6845885576832829 | T | T | T |
| 0.0384210534885501 | 0.0985184294002493 | 0.6837055664771737 | T | T | T |
| 0.4496090534121771 | 0.4798731742957357 | 0.6896023228454856 | T | T | T |
| 0.2611114134867804 | 0.6108021226386628 | 0.6799339541173263 | T | T | T |
| 0.3240847683757765 | 0.8245335306388059 | 0.6780716040771000 | T | T | T |

Best + 3

1.0000000000000000

|                     |                     |                     |
|---------------------|---------------------|---------------------|
| 14.6581653332033461 | 0.0000000000000000  | 0.0000000000000000  |
| 7.3189795989957736  | 12.7095316657975506 | 0.0000000000000000  |
| -0.0098891034462902 | -0.0168642175486257 | 51.7150080587397056 |

In Sn O H Pt

56 8 100 8 2

Selective dynamics

Direct

|                    |                    |                    |   |   |   |
|--------------------|--------------------|--------------------|---|---|---|
| 0.7601334683925316 | 0.0111196284508281 | 0.4659634855339050 | F | F | F |
| 0.2397990222127078 | 0.9863352678444528 | 0.4737760756088107 | F | F | F |
| 0.7715588052310096 | 0.2382440998621718 | 0.4737760756088107 | F | F | F |
| 0.0114253481492099 | 0.2271244657591041 | 0.4659634855339050 | F | F | F |
| 0.9885071424342016 | 0.7703304135794511 | 0.4737760756088107 | F | F | F |
| 0.9992903736448469 | 0.4987274529686729 | 0.4698697869370179 | F | F | F |
| 0.5006083460974438 | 0.9974548753487298 | 0.4698697869370179 | F | F | F |
| 0.5711026190239110 | 0.3212438999490672 | 0.5325343176450374 | F | F | F |
| 0.0957701894278102 | 0.3438156643639090 | 0.5244126049570497 | F | F | F |
| 0.5954002788407777 | 0.8428761420777775 | 0.5239512181533499 | F | F | F |
| 0.0723457897014868 | 0.8193845017652066 | 0.5323927895013369 | F | F | F |
| 0.1070648802758711 | 0.5700070441001301 | 0.5325343176450374 | F | F | F |
| 0.5592163182809529 | 0.0952136194229070 | 0.5244126049570497 | F | F | F |
| 0.5598611324288072 | 0.5936048851403370 | 0.5239512181533499 | F | F | F |
| 0.1070842580214730 | 0.0712056639447667 | 0.5323927895013369 | F | F | F |
| 0.3217649856391844 | 0.1062039465938440 | 0.5325343176450374 | F | F | F |
| 0.3449459772301964 | 0.5584256068562183 | 0.5244126049570497 | F | F | F |
| 0.8446035586083482 | 0.5584287540679753 | 0.5239512181533499 | F | F | F |

|                    |                    |                    |   |   |   |
|--------------------|--------------------|--------------------|---|---|---|
| 0.8205024372159997 | 0.1068647249330610 | 0.5323927895013369 | F | F | F |
| 0.3340676120032526 | 0.8312648480018296 | 0.5281957169818696 | F | F | F |
| 0.8324680001261981 | 0.3325994467597084 | 0.5281957169818696 | F | F | F |
| 0.3333108283129889 | 0.3324849635476852 | 0.5286123655445181 | F | F | F |
| 0.8333293577484682 | 0.8310454865245305 | 0.5281957169818696 | F | F | F |
| 0.2283736683972180 | 0.7592107964331092 | 0.4659634855339050 | F | F | F |
| 0.4999662501356283 | 0.4987274529686729 | 0.4698697869370179 | F | F | F |
| 0.7722008935562172 | 0.7369715375365402 | 0.4737760782952236 | F | F | F |
| 0.4891830112588380 | 0.7703304059322917 | 0.4737760782952236 | F | F | F |
| 0.7384810650628779 | 0.4876078378172437 | 0.4737760782952236 | F | F | F |
| 0.7599798150355485 | 0.0028421790321136 | 0.6413245250564061 | T | T | T |
| 0.9078005770518152 | 0.6505974020664180 | 0.5883942174594324 | T | T | T |
| 0.4255641122296089 | 0.6821501558857906 | 0.5841509651901041 | T | T | T |
| 0.9271518495229039 | 0.1769126650198207 | 0.5822385114825671 | T | T | T |
| 0.4023558474016804 | 0.1565084195929491 | 0.5910167839374942 | T | T | T |
| 0.2385123024742411 | 0.7594490994374927 | 0.6377338616549634 | T | T | T |
| 0.4406031168381033 | 0.9065538779032761 | 0.5897481426989766 | T | T | T |
| 0.8987205318757037 | 0.4233896387957604 | 0.5820519668891675 | T | T | T |
| 0.7641415452159552 | 0.2557874142288673 | 0.6447713639157536 | T | T | T |
| 0.8937213149129962 | 0.9270031325689984 | 0.5823945063090713 | T | T | T |
| 0.4404078782559430 | 0.4026823927749439 | 0.5908078333577007 | T | T | T |
| 0.2247033183362335 | 0.2467487426258590 | 0.6418531281394912 | T | T | T |
| 0.0094869423206928 | 0.2296005874884110 | 0.6416136598599562 | T | T | T |
| 0.6520185850564119 | 0.4416481518303884 | 0.5885315342075863 | T | T | T |
| 0.6778314216703981 | 0.8951683654212182 | 0.5816364789741820 | T | T | T |
| 0.1754568732847614 | 0.8928203832051460 | 0.5818086420874143 | T | T | T |
| 0.1571605349853541 | 0.4336470706927830 | 0.5911828882264193 | T | T | T |
| 0.5147804611039106 | 0.2248607536684346 | 0.6404732339366747 | T | T | T |
| 0.6695427308966690 | 0.6672838975368249 | 0.5835015213110754 | T | T | T |
| 0.0057151140226284 | 0.4999010670643700 | 0.6456834568913633 | T | T | T |
| 0.6680130866529701 | 0.1640986334658560 | 0.5866743800530779 | T | T | T |
| 0.4903458149343676 | 0.5332103899547325 | 0.6419663221203989 | T | T | T |
| 0.1646495493364643 | 0.1645505915913353 | 0.5862008732467283 | T | T | T |
| 0.5040354801371877 | 0.9959812699121184 | 0.6437094514844783 | T | T | T |
| 0.1646188307568073 | 0.6641848404341627 | 0.5860954169742912 | T | T | T |
| 0.2352521737871153 | 0.9981975957274792 | 0.6526549236617065 | T | T | T |
| 0.2621303792734859 | 0.5046889266821472 | 0.6400812615950195 | T | T | T |
| 0.9905455927039543 | 0.7574676056897556 | 0.6485934887981188 | T | T | T |
| 0.2277315647397131 | 0.2604833434644362 | 0.4659634882203321 | F | F | F |
| 0.5107495099301005 | 0.2271244581119447 | 0.4659634882203321 | F | F | F |
| 0.2614514102691530 | 0.5098470890666533 | 0.4659634882203321 | F | F | F |
| 0.0000000000000000 | 0.0000000000000000 | 0.4698697815641637 | F | F | F |
| 0.7457719967113421 | 0.4951729483275409 | 0.6446958024622791 | T | T | T |
| 0.7702079915546340 | 0.7377433374607908 | 0.6447192687462332 | T | T | T |

|                    |                    |                    |   |   |   |
|--------------------|--------------------|--------------------|---|---|---|
| 0.4951910892983978 | 0.7642475166929601 | 0.6456413349769394 | T | T | T |
| 0.9993918506186459 | 0.0000763453325807 | 0.6446673830911925 | T | T | T |
| 0.8159599359379399 | 0.8579122813819282 | 0.4853073788173816 | F | F | F |
| 0.3952951534094780 | 0.9363767461815229 | 0.4577430201053687 | F | F | F |
| 0.9176869787037418 | 0.1541639962793013 | 0.4492957297685578 | F | F | F |
| 0.1695994874784077 | 0.4323415158892061 | 0.4596076389699917 | F | F | F |
| 0.3245503040634432 | 0.8138816341340984 | 0.4853073788173816 | F | F | F |
| 0.6662166882857647 | 0.3936186536121724 | 0.4577430201053687 | F | F | F |
| 0.9266394692931357 | 0.9163920824521128 | 0.4492957297685578 | F | F | F |
| 0.3969640192055408 | 0.1688408520964444 | 0.4596076389699917 | F | F | F |
| 0.8593547298765358 | 0.3231158657700490 | 0.4853073788173816 | F | F | F |
| 0.9383531281826833 | 0.6649143814923804 | 0.4577430201053687 | F | F | F |
| 0.1555385218810557 | 0.9243537025546544 | 0.4492957297685578 | F | F | F |
| 0.4333689782550181 | 0.3962725226573838 | 0.4596076389699917 | F | F | F |
| 0.1839725646666253 | 0.1395426248879019 | 0.4544321788212997 | F | F | F |
| 0.6046373471950943 | 0.0610781600883072 | 0.4819965375333126 | F | F | F |
| 0.0822455252339367 | 0.8432909133153856 | 0.4904438267021192 | F | F | F |
| 0.8303330131261575 | 0.5651133903806240 | 0.4801319186686825 | F | F | F |
| 0.6753821496046513 | 0.1835732721357388 | 0.4544321788212997 | F | F | F |
| 0.3337157653823439 | 0.6038362526576577 | 0.4819965375333126 | F | F | F |
| 0.0732929777215929 | 0.0810628271425600 | 0.4904438267021192 | F | F | F |
| 0.6029684344625679 | 0.8286140541733857 | 0.4801319186686825 | F | F | F |
| 0.1405777706676758 | 0.6743389936194006 | 0.4544321788212997 | F | F | F |
| 0.0615793723615283 | 0.3325404778970764 | 0.4819965375333126 | F | F | F |
| 0.8443939819834299 | 0.0731011501850887 | 0.4904438267021192 | F | F | F |
| 0.5665635222892007 | 0.6011823367320730 | 0.4801319186686825 | F | F | F |
| 0.5157033466994037 | 0.4720642166451867 | 0.5128125034488065 | F | F | F |
| 0.9382155266378476 | 0.3935697119943384 | 0.5402222571510507 | F | F | F |
| 0.4134764846239136 | 0.1788316355844657 | 0.5490782248169097 | F | F | F |
| 0.1652727673189958 | 0.8968637606432637 | 0.5386393295024519 | F | F | F |
| 0.0115860744760994 | 0.5144800304850392 | 0.5128125034488065 | F | F | F |
| 0.6667529985908658 | 0.9365882393736200 | 0.5402222571510507 | F | F | F |
| 0.4068878560599956 | 0.4127524079384770 | 0.5490782248169097 | F | F | F |
| 0.9354527360783820 | 0.1639219592684142 | 0.5386393295024519 | F | F | F |
| 0.4726430637634564 | 0.0109106435128155 | 0.5128125034488065 | F | F | F |
| 0.3948964446492127 | 0.6647518299181101 | 0.5402222571510507 | F | F | F |
| 0.1795681442550503 | 0.4058708471200845 | 0.5490782248169097 | F | F | F |
| 0.8991394664805483 | 0.9341240613744048 | 0.5386393295024519 | F | F | F |
| 0.1502529583315635 | 0.1927478839608767 | 0.5438600605743957 | F | F | F |
| 0.7266414664239278 | 0.2718121688495998 | 0.5161713476883989 | F | F | F |
| 0.2526104716998674 | 0.4861492806533860 | 0.5077022588577265 | F | F | F |
| 0.5025193335949325 | 0.7654379243932397 | 0.5178780203333417 | F | F | F |
| 0.6558578905342074 | 0.1498255430760409 | 0.5438600605743957 | F | F | F |
| 0.0011533585709813 | 0.7254235855908746 | 0.5161713476883989 | F | F | F |

|                    |                    |                    |   |   |   |
|--------------------|--------------------|--------------------|---|---|---|
| 0.2602568251204715 | 0.2516834436997044 | 0.5077022588577265 | F | F | F |
| 0.7300539366250547 | 0.5009345144027506 | 0.5178780203333417 | F | F | F |
| 0.1938216360732028 | 0.6548814636061238 | 0.5438600605743957 | F | F | F |
| 0.2721376599440504 | 0.0002191362025528 | 0.5161713476883989 | F | F | F |
| 0.4870651881186276 | 0.2596221662899509 | 0.5077022588577265 | F | F | F |
| 0.7672916996579389 | 0.7285373424900783 | 0.5178780203333417 | F | F | F |
| 0.8174125864293419 | 0.8424198471325998 | 0.6565743298022542 | T | T | T |
| 0.8503379758007129 | 0.8047891739110914 | 0.5707267017114059 | T | T | T |
| 0.2623431152054347 | 0.7296206034822480 | 0.5949319372701984 | T | T | T |
| 0.3980656802366286 | 0.9306055885167034 | 0.6336089891944443 | T | T | T |
| 0.7506202919039622 | 0.5136851309776183 | 0.6057022325073000 | T | T | T |
| 0.9157459489409689 | 0.1488105431280295 | 0.6251858087427128 | T | T | T |
| 0.4976597990483769 | 0.2320492120252751 | 0.5975090789146681 | T | T | T |
| 0.1773599460705670 | 0.4234956238587261 | 0.6361221931142089 | T | T | T |
| 0.4058196744194539 | 0.7013599603855386 | 0.6286455359311889 | T | T | T |
| 0.3440340454277734 | 0.8498188278543827 | 0.5714928235038330 | T | T | T |
| 0.9970141828050375 | 0.2680393568606791 | 0.5985047375447521 | T | T | T |
| 0.6570951901979964 | 0.4150610161568908 | 0.6318230636495485 | T | T | T |
| 0.7400590225817832 | 0.7481532862000866 | 0.6057919626516102 | T | T | T |
| 0.9327198207747399 | 0.9187727221137757 | 0.6251424961531173 | T | T | T |
| 0.2697289588261090 | 0.4936532909490898 | 0.5970114871901869 | T | T | T |
| 0.3947570067001421 | 0.1708334099794582 | 0.6358995560700190 | T | T | T |
| 0.8480141910653101 | 0.3424856467553122 | 0.6549474055115957 | T | T | T |
| 0.8055790380685348 | 0.3435754077890745 | 0.5710230754955183 | T | T | T |
| 0.7307580291454294 | 0.9971901010549141 | 0.5987317849271742 | T | T | T |
| 0.9320379117502812 | 0.6646140742546431 | 0.6290009767392911 | T | T | T |
| 0.5296869853845337 | 0.7465890329269746 | 0.6063262612819985 | T | T | T |
| 0.1499117140993604 | 0.9231798742534402 | 0.6253546242274314 | T | T | T |
| 0.2324144876796511 | 0.2650358068522436 | 0.5976264190347416 | T | T | T |
| 0.4358468073685060 | 0.4019349767687931 | 0.6360172184950367 | T | T | T |
| 0.4815164262122964 | 0.5233176237040141 | 0.5991663820720623 | T | T | T |
| 0.1759511632786439 | 0.1337475230691796 | 0.6273260824165141 | T | T | T |
| 0.6006317161075490 | 0.0606511672344962 | 0.6554529170122141 | T | T | T |
| 0.0646585361994066 | 0.6000010415341820 | 0.5744479861548115 | T | T | T |
| 0.0683708331375701 | 0.8484815734207337 | 0.6656289027923368 | T | T | T |
| 0.5862889857357730 | 0.8235288011940608 | 0.5649972429549746 | T | T | T |
| 0.8258447870826118 | 0.5771348512150536 | 0.6537879989212410 | T | T | T |
| 0.8359326673196152 | 0.0993205397666382 | 0.5760658808767419 | T | T | T |
| 0.9939064306933220 | 0.4785047190263024 | 0.6020047283956768 | T | T | T |
| 0.6823488018554249 | 0.1791333280971157 | 0.6294388101149421 | T | T | T |
| 0.2930061543220220 | 0.5239391313530835 | 0.6816014517889621 | T | T | T |
| 0.3324986661319855 | 0.0620416430224304 | 0.5745169861155633 | T | T | T |
| 0.0650776086626550 | 0.0763674496971285 | 0.6642853211205584 | T | T | T |
| 0.5903283532005859 | 0.5888903040072706 | 0.5658574778281121 | T | T | T |

|                    |                    |                    |   |   |   |
|--------------------|--------------------|--------------------|---|---|---|
| 0.6058149944140596 | 0.8201013431273820 | 0.6537675691600828 | T | T | T |
| 0.0604579978374045 | 0.8347837142017573 | 0.5759639184238421 | T | T | T |
| 0.5257111934818809 | 0.9918372623705621 | 0.6015246941871483 | T | T | T |
| 0.1495647664937048 | 0.6725281462242442 | 0.6303582238591614 | T | T | T |
| 0.0632284307617225 | 0.3352272110014785 | 0.6555801239336158 | T | T | T |
| 0.6064313029113579 | 0.3295229846999249 | 0.5746215122988310 | T | T | T |
| 0.8618485561598230 | 0.0394090457502870 | 0.6671556130204715 | T | T | T |
| 0.8244967272172081 | 0.5890071405958068 | 0.5653021447325137 | T | T | T |
| 0.5969083261513388 | 0.6025184963637119 | 0.6560307397534636 | T | T | T |
| 0.0987845522982023 | 0.0614236839723166 | 0.5759014853812042 | T | T | T |
| 0.7228212869384825 | 0.2377776556614771 | 0.6837150174346258 | T | T | T |
| 0.0313045757249918 | 0.6124396287129732 | 0.6721876622921413 | T | T | T |
| 0.2831511996749552 | 0.1060154242982171 | 0.6722491371018245 | T | T | T |
| 0.5398671704562337 | 0.2485469773337906 | 0.6836686943170139 | T | T | T |
| 0.8255391667623929 | 0.1015709794102067 | 0.6787598487650300 | T | T | T |
| 0.7383629335810038 | 0.2788611172209927 | 0.6958917383769976 | T | T | T |
| 0.0797313477886512 | 0.5883780420749671 | 0.6868181109548034 | T | T | T |
| 0.2587868837942195 | 0.1254282176676543 | 0.6900141813971233 | T | T | T |
| 0.6096628998521834 | 0.2500513805055074 | 0.6849149887472704 | T | T | T |
| 0.5608253460275033 | 0.1754564060598788 | 0.6881062737872223 | T | T | T |
| 0.0758487168531032 | 0.8534359043518132 | 0.6842620283215030 | T | T | T |
| 0.3567973859454338 | 0.4578246006271786 | 0.6859752723593434 | T | T | T |
| 0.3352577378173133 | 0.6405531432365552 | 0.6778285221956640 | T | T | T |
| 0.3482515096054610 | 0.8107104815279939 | 0.6811743940843026 | T | T | T |

**Pt-trimer on 4-H<sub>2</sub>O Indium Tin Oxide ( In order of increasing energy as shown in the SI)**

Best:

In Sn O H Pt

1.0000000000000000

14.6581653332033461 0.0000000000000000 0.0000000000000000

7.3189795989957736 12.7095316657975506 0.0000000000000000

-0.1539898045825509 0.0117348602194267 44.4205337057521348

In Sn O H Pt

56 8 100 8 3

Selective dynamics

Direct

0.7601299999999966 0.0111199999999982 0.3212997282865118 F F F

0.2434165335433676 0.9854015590178022 0.3303952552037757 F F F

0.7751763166389409 0.2373103908289238 0.3303952552037757 F F F

0.7758184051208019 0.7360378284433793 0.3303952583554732 F F F

0.0149432086993002 0.2262095211845576 0.3212997282865118 F F F



|                    |                    |                    |   |   |   |
|--------------------|--------------------|--------------------|---|---|---|
| 0.9921246538137325 | 0.7693967045361916 | 0.3303952552037757 | F | F | F |
| 0.4928005224042380 | 0.7693966968225325 | 0.3303952583554732 | F | F | F |
| 0.0028580599244989 | 0.4978031261506217 | 0.3258474991741451 | F | F | F |
| 0.5041760321789965 | 0.9965305487398979 | 0.3258474991741451 | F | F | F |
| 0.5754695993874179 | 0.3201690636836290 | 0.3988024242875312 | F | F | F |
| 0.1000335765341589 | 0.3427603350605963 | 0.3893470124551968 | F | F | F |
| 0.5996577811357540 | 0.8418219209004363 | 0.3888098595214231 | F | F | F |
| 0.0767109653050468 | 0.8183100051456691 | 0.3986376552181525 | F | F | F |
| 0.1114318610020959 | 0.5689322078448171 | 0.3988024242875312 | F | F | F |
| 0.5634797054024645 | 0.0941582901478952 | 0.3893470124551968 | F | F | F |
| 0.5641186345741858 | 0.5925506639960076 | 0.3888098595214231 | F | F | F |
| 0.1114494334935046 | 0.0701311676366885 | 0.3986376552181525 | F | F | F |
| 0.3261319662881945 | 0.1051291103740297 | 0.3988024242875312 | F | F | F |
| 0.3492093643680292 | 0.5573702775606932 | 0.3893470124551968 | F | F | F |
| 0.8488610604088223 | 0.5573745329822160 | 0.3888098595214231 | F | F | F |
| 0.8248676130051109 | 0.1057902286404513 | 0.3986376552181525 | F | F | F |
| 0.3383792532104977 | 0.8302004322606820 | 0.3937513645347082 | F | F | F |
| 0.8367796411124147 | 0.3315350310755605 | 0.3937513645347082 | F | F | F |
| 0.7420985760889067 | 0.4866741287148670 | 0.3303952583554732 | F | F | F |
| 0.3376277839809418 | 0.3314195471817456 | 0.3942364325472383 | F | F | F |
| 0.8376409987888778 | 0.8299810709125808 | 0.3937513645347082 | F | F | F |
| 0.2318915289287986 | 0.7582958518869418 | 0.3212997282865118 | F | F | F |
| 0.5035339362280098 | 0.4978031261506217 | 0.3258474991741451 | F | F | F |
| 0.7685842099745938 | 0.0101077595072514 | 0.5257313752849756 | T | T | T |
| 0.9120712059987645 | 0.6501615606863415 | 0.4661329946318516 | T | T | T |
| 0.4325327148542324 | 0.6763995607846123 | 0.4558503439532309 | T | T | T |
| 0.9326135453282934 | 0.1770018302427042 | 0.4559568171945558 | T | T | T |
| 0.4082150272211669 | 0.1545978723371444 | 0.4664085689235317 | T | T | T |
| 0.2389873698817299 | 0.7570322940489660 | 0.5236348658011734 | T | T | T |
| 0.4473374876100272 | 0.9037400546480826 | 0.4652133576456377 | T | T | T |
| 0.8977449102889499 | 0.4267284014435801 | 0.4568529207063917 | T | T | T |
| 0.7777617932184089 | 0.2356219838572350 | 0.5351106870072283 | T | T | T |
| 0.8991803796652202 | 0.9258309630662647 | 0.4563782383148795 | T | T | T |
| 0.4426121736357334 | 0.3990790938633709 | 0.4660046787273608 | T | T | T |
| 0.2350068871923237 | 0.2391853859762767 | 0.5254552417630034 | T | T | T |
| 0.0106055566593352 | 0.2353516833029860 | 0.5223755940021165 | T | T | T |
| 0.6556963231400095 | 0.4381854811453715 | 0.4654438529930889 | T | T | T |
| 0.6846074426032465 | 0.8928192498087881 | 0.4567011955843973 | T | T | T |
| 0.1822918647596234 | 0.8924275446019516 | 0.4564865025809209 | T | T | T |
| 0.1630209489759863 | 0.4347433097392900 | 0.4669925430901352 | T | T | T |
| 0.5219486436602685 | 0.2224695362890964 | 0.5242406634583724 | T | T | T |
| 0.6716934844948457 | 0.6647529280419509 | 0.4630611859543135 | T | T | T |
| 0.0196259512301800 | 0.4856500132772475 | 0.5295406085955953 | T | T | T |
| 0.6734023085217483 | 0.1629064515917854 | 0.4616559747157770 | T | T | T |

|                    |                    |                    |   |   |   |
|--------------------|--------------------|--------------------|---|---|---|
| 0.4901934373278341 | 0.5002962653722336 | 0.5255470806409857 | T | T | T |
| 0.1703112868360218 | 0.1641650130895985 | 0.4604124979896302 | T | T | T |
| 0.5105414780554838 | 0.0013468478411456 | 0.5279669156195080 | T | T | T |
| 0.1716323312209048 | 0.6656824716386569 | 0.4605652128019825 | T | T | T |
| 0.2527162937370681 | 0.9878114953190519 | 0.5333653438655711 | T | T | T |
| 0.2579446216749902 | 0.5196185059307997 | 0.5239205200659665 | T | T | T |
| 0.9989793806207622 | 0.7662687379185061 | 0.5332521927728306 | T | T | T |
| 0.2649692708826521 | 0.5089321445234489 | 0.3212997314382093 | F | F | F |
| 0.0035676858993980 | 0.9990756731962591 | 0.3258474928707500 | F | F | F |
| 0.2312494253227371 | 0.2595683989238466 | 0.3212997314382093 | F | F | F |
| 0.5142673705564675 | 0.2262095135495770 | 0.3212997314382093 | F | F | F |
| 0.7257843618004723 | 0.4831446626693751 | 0.5339407357422409 | T | T | T |
| 0.7861656441477930 | 0.7460852692217753 | 0.5341503025968677 | T | T | T |
| 0.4879508316310053 | 0.7621390001243031 | 0.5322060620915458 | T | T | T |
| 0.0009333761022398 | 0.0019535683483246 | 0.5269519756843716 | T | T | T |
| 0.8197245306682390 | 0.8569508763088862 | 0.3438201600901110 | F | F | F |
| 0.3987081608861587 | 0.9354815458449366 | 0.3117293471016254 | F | F | F |
| 0.9209922397635992 | 0.1532890848265680 | 0.3018948934479724 | F | F | F |
| 0.1730362783713417 | 0.4314418369345745 | 0.3139001625321427 | F | F | F |
| 0.3283148989230753 | 0.8129202287039874 | 0.3438201600901110 | F | F | F |
| 0.6696296955644030 | 0.3927234531479655 | 0.3117293471016254 | F | F | F |
| 0.9299447303656834 | 0.9155171710171928 | 0.3018948934479724 | F | F | F |
| 0.4004008100581657 | 0.1679411731758620 | 0.3139001625321427 | F | F | F |
| 0.8631193247769602 | 0.3221544605376110 | 0.3438201600901110 | F | F | F |
| 0.9417661356484075 | 0.6640191810841145 | 0.3117293471016254 | F | F | F |
| 0.1588437830399343 | 0.9234787908990896 | 0.3018948934479724 | F | F | F |
| 0.4368057691204541 | 0.3953728437525825 | 0.3139001625321427 | F | F | F |
| 0.1873433418511681 | 0.1386553765605854 | 0.3078748193479939 | F | F | F |
| 0.6083597115729162 | 0.0601247068673771 | 0.3399656321113582 | F | F | F |
| 0.0860756361414658 | 0.8423171707979833 | 0.3498000846394120 | F | F | F |
| 0.8340315940587928 | 0.5641644156990608 | 0.3377948166808480 | F | F | F |
| 0.6787529268564683 | 0.1826860237720780 | 0.3078748193479939 | F | F | F |
| 0.3374381297247666 | 0.6028827994856698 | 0.3399656321113582 | F | F | F |
| 0.0771230884463421 | 0.0800890850007647 | 0.3498000846394120 | F | F | F |
| 0.6066670156113929 | 0.8276650793790878 | 0.3377948166808480 | F | F | F |
| 0.1439485478357412 | 0.6734517452805591 | 0.3078748193479939 | F | F | F |
| 0.0653017366889372 | 0.3315870247342687 | 0.3399656321113582 | F | F | F |
| 0.8482240925665394 | 0.0721274080750689 | 0.3498000846394120 | F | F | F |
| 0.5702621035290605 | 0.6002333619871152 | 0.3377948166808480 | F | F | F |
| 0.5198187726736379 | 0.4710367487921232 | 0.3758420117279684 | F | F | F |
| 0.9426805682623609 | 0.3924764106726286 | 0.4077528311564294 | F | F | F |
| 0.4180544851025232 | 0.1777170637495047 | 0.4180630728800807 | F | F | F |
| 0.1697176184977991 | 0.8957742608203105 | 0.4059099647347324 | F | F | F |
| 0.0157015007558172 | 0.5134525626218860 | 0.3758420117279684 | F | F | F |

|                    |                    |                    |   |   |   |
|--------------------|--------------------|--------------------|---|---|---|
| 0.6712180398470551 | 0.9354949379856805 | 0.4077528311564294 | F | F | F |
| 0.4114658565705795 | 0.4116378360625106 | 0.4180630728800807 | F | F | F |
| 0.9398975868734993 | 0.1628324598200166 | 0.4059099647347324 | F | F | F |
| 0.4767584900125641 | 0.0098831757007858 | 0.3758420117279684 | F | F | F |
| 0.3993614858472370 | 0.6636585286003154 | 0.4077528311564294 | F | F | F |
| 0.1841461447858563 | 0.4047562752544636 | 0.4180630728800807 | F | F | F |
| 0.9035843176360459 | 0.9330345621793654 | 0.4059099647347324 | F | F | F |
| 0.1547644004390776 | 0.1916458452052581 | 0.4119880130487985 | F | F | F |
| 0.7307997352263129 | 0.2707766336215016 | 0.3797524253477320 | F | F | F |
| 0.2566607160774623 | 0.4851340867038942 | 0.3698925933407295 | F | F | F |
| 0.5066993712809946 | 0.7643982900759099 | 0.3817393573504972 | F | F | F |
| 0.6603693326687292 | 0.1487235043712474 | 0.4119880130487985 | F | F | F |
| 0.0053116273190454 | 0.7243880503595861 | 0.3797524253477320 | F | F | F |
| 0.2643070694647278 | 0.2506682497746482 | 0.3698925933407295 | F | F | F |
| 0.7342339744034376 | 0.4998948800842840 | 0.3817393573504972 | F | F | F |
| 0.1983330781461632 | 0.6537794249032487 | 0.4119880130487985 | F | F | F |
| 0.2762959286617175 | 0.9991836010246260 | 0.3797524253477320 | F | F | F |
| 0.4911154325054667 | 0.2586069723533484 | 0.3698925933407295 | F | F | F |
| 0.7714717372890760 | 0.7274977081085865 | 0.3817393573504972 | F | F | F |
| 0.8347145505772549 | 0.8506211148047403 | 0.5446612245438994 | T | T | T |
| 0.8545404632274897 | 0.8019161494655226 | 0.4439765583499183 | T | T | T |
| 0.2771040938046395 | 0.7297316268653855 | 0.4748017605240083 | T | T | T |
| 0.4150572461668817 | 0.9274421249629192 | 0.5153576395234770 | T | T | T |
| 0.7519932704120074 | 0.5133782025367365 | 0.4898627114238779 | T | T | T |
| 0.9340908266422441 | 0.1464530930018466 | 0.5048991894183484 | T | T | T |
| 0.5032767647417958 | 0.2286016894437889 | 0.4737501049644504 | T | T | T |
| 0.1852592848622409 | 0.4260680138274481 | 0.5197547803121173 | T | T | T |
| 0.3328657181144781 | 0.8186522156849910 | 0.5439912431612091 | T | T | T |
| 0.3495889516612631 | 0.8488372273194971 | 0.4433776466674911 | T | T | T |
| 0.0032573232724539 | 0.2709764918374945 | 0.4735953813099313 | T | T | T |
| 0.6627286414236399 | 0.3949551342323124 | 0.5141668653728505 | T | T | T |
| 0.7435879520711131 | 0.7487440120925620 | 0.4889323961273124 | T | T | T |
| 0.9399987921323139 | 0.9174906533685446 | 0.5053078113715690 | T | T | T |
| 0.2727207997707552 | 0.4971648139419871 | 0.4737102570182870 | T | T | T |
| 0.4010031156213376 | 0.1696339755676599 | 0.5184578602398245 | T | T | T |
| 0.8544646748662078 | 0.3307290862035517 | 0.5412577469222078 | T | T | T |
| 0.8081329004019996 | 0.3455581887516690 | 0.4440077500848068 | T | T | T |
| 0.7383861951959894 | 0.9956177123413428 | 0.4759381061646054 | T | T | T |
| 0.9439405140687331 | 0.6595674332425933 | 0.5145980465748214 | T | T | T |
| 0.5148011268393150 | 0.7396883493623860 | 0.4858352568807612 | T | T | T |
| 0.1508700886231707 | 0.9274637889921450 | 0.5067842090346875 | T | T | T |
| 0.2369936333229800 | 0.2651286678947160 | 0.4748546327479687 | T | T | T |
| 0.4330722846169178 | 0.3919412997577510 | 0.5180685027292181 | T | T | T |
| 0.4817137389378148 | 0.5232818756596161 | 0.4764974075355752 | T | T | T |

|                    |                    |                    |   |   |   |
|--------------------|--------------------|--------------------|---|---|---|
| 0.1794828512578355 | 0.1301084173343577 | 0.5080151650085226 | T | T | T |
| 0.6102265182475755 | 0.0633052079151120 | 0.5409079390535290 | T | T | T |
| 0.0672338802989323 | 0.6007265510290808 | 0.4477455786939554 | T | T | T |
| 0.0824012276451510 | 0.8550012276885730 | 0.5538254123902084 | T | T | T |
| 0.5954745251043044 | 0.8160839552427399 | 0.4383018334861170 | T | T | T |
| 0.0024941416486694 | 0.5368913165769590 | 0.5769728473854258 | T | T | T |
| 0.8413722140354651 | 0.0984614832822178 | 0.4493820091749617 | T | T | T |
| 0.9981739374472334 | 0.4779003163308775 | 0.4801779091224757 | T | T | T |
| 0.6868741739700318 | 0.1808578231803616 | 0.5103902459565834 | T | T | T |
| 0.3330152081962798 | 0.6001361960012513 | 0.5422179181242663 | T | T | T |
| 0.3382730312684341 | 0.0600765486846107 | 0.4476354939177331 | T | T | T |
| 0.0797131219965033 | 0.0723259160782331 | 0.5537595700180776 | T | T | T |
| 0.5992274804229921 | 0.5845642520049150 | 0.4383155926694242 | T | T | T |
| 0.6313433892602218 | 0.8622263098782814 | 0.5497303802343954 | T | T | T |
| 0.0682446900381573 | 0.8341658322230519 | 0.4491632884998630 | T | T | T |
| 0.5323078670175403 | 0.9904941289984386 | 0.4783751689052715 | T | T | T |
| 0.1427227111615584 | 0.6854338943495556 | 0.5087683279422317 | T | T | T |
| 0.0766730747309672 | 0.3232815122117714 | 0.5411724748940653 | T | T | T |
| 0.6096007765827834 | 0.3288792117307052 | 0.4476605669855340 | T | T | T |
| 0.8635550776709922 | 0.0691532143385892 | 0.5511835800588093 | T | T | T |
| 0.8241969855980231 | 0.5900114421004420 | 0.4389810806467885 | T | T | T |
| 0.5547160357279051 | 0.5975700171994650 | 0.5337107750491165 | T | T | T |
| 0.1042470985771318 | 0.0608346336785174 | 0.4488882601820405 | T | T | T |
| 0.6733045360052063 | 0.3029394325887466 | 0.5738751766368492 | T | T | T |
| 0.0888031721173041 | 0.6469585554141534 | 0.5670711315527401 | T | T | T |
| 0.2989206308078524 | 0.0902274616887502 | 0.5590645169972905 | T | T | T |
| 0.5334395941646758 | 0.2504602898014203 | 0.5742158541808950 | T | T | T |
| 0.7127019233979967 | 0.2857533597385665 | 0.5926801548170133 | T | T | T |
| 0.1135820117300617 | 0.6688606601184977 | 0.5844519131555500 | T | T | T |
| 0.2819661900868605 | 0.1047248188723758 | 0.5803545871580932 | T | T | T |
| 0.5925731387873145 | 0.2722489437260426 | 0.5758944757826463 | T | T | T |
| 0.5688806602152557 | 0.1752596384510218 | 0.5792236112803902 | T | T | T |
| 0.0839015885509384 | 0.8617872045147450 | 0.5756393714962180 | T | T | T |
| 0.0626511658026983 | 0.0828145874853718 | 0.5751646069193390 | T | T | T |
| 0.0281454714958194 | 0.5906195614483151 | 0.5756141206182925 | T | T | T |
| 0.8489795063833033 | 0.5803019230922115 | 0.5702757351364462 | T | T | T |
| 0.7022040804670140 | 0.5466063915901384 | 0.5883027884828859 | T | T | T |
| 0.6407687725898744 | 0.7272849773838299 | 0.5663989914326634 | T | T | T |

Best + 1:

In Sn O H Pt

1.0000000000000000

14.6581653332033461 0.0000000000000000 0.0000000000000000

7.3189795989957736 12.7095316657975506 0.0000000000000000  
-0.0098891034462902 -0.0168642175486257 51.7150080587397056

In Sn O H Pt  
56 8 100 8 3

Selective dynamics

Direct

|                    |                    |                    |   |   |   |
|--------------------|--------------------|--------------------|---|---|---|
| 0.7601334683925316 | 0.0111196284508281 | 0.4659634855339050 | F | F | F |
| 0.2397990222127078 | 0.9863352678444528 | 0.4737760756088107 | F | F | F |
| 0.7715588052310096 | 0.2382440998621718 | 0.4737760756088107 | F | F | F |
| 0.0114253481492099 | 0.2271244657591041 | 0.4659634855339050 | F | F | F |
| 0.9885071424342016 | 0.7703304135794511 | 0.4737760756088107 | F | F | F |
| 0.9992903736448469 | 0.4987274529686729 | 0.4698697869370179 | F | F | F |
| 0.5006083460974438 | 0.9974548753487298 | 0.4698697869370179 | F | F | F |
| 0.5711026190239110 | 0.3212438999490672 | 0.5325343176450374 | F | F | F |
| 0.0957701894278102 | 0.3438156643639090 | 0.5244126049570497 | F | F | F |
| 0.5954002788407777 | 0.8428761420777775 | 0.5239512181533499 | F | F | F |
| 0.0723457897014868 | 0.8193845017652066 | 0.5323927895013369 | F | F | F |
| 0.1070648802758711 | 0.5700070441001301 | 0.5325343176450374 | F | F | F |
| 0.5592163182809529 | 0.0952136194229070 | 0.5244126049570497 | F | F | F |
| 0.5598611324288072 | 0.5936048851403370 | 0.5239512181533499 | F | F | F |
| 0.1070842580214730 | 0.0712056639447667 | 0.5323927895013369 | F | F | F |
| 0.3217649856391844 | 0.1062039465938440 | 0.5325343176450374 | F | F | F |
| 0.3449459772301964 | 0.5584256068562183 | 0.5244126049570497 | F | F | F |
| 0.8446035586083482 | 0.5584287540679753 | 0.5239512181533499 | F | F | F |
| 0.8205024372159997 | 0.1068647249330610 | 0.5323927895013369 | F | F | F |
| 0.3340676120032526 | 0.8312648480018296 | 0.5281957169818696 | F | F | F |
| 0.8324680001261981 | 0.3325994467597084 | 0.5281957169818696 | F | F | F |
| 0.3333108283129889 | 0.3324849635476852 | 0.5286123655445181 | F | F | F |
| 0.8333293577484682 | 0.8310454865245305 | 0.5281957169818696 | F | F | F |
| 0.2283736683972180 | 0.7592107964331092 | 0.4659634855339050 | F | F | F |
| 0.4999662501356283 | 0.4987274529686729 | 0.4698697869370179 | F | F | F |
| 0.7722008935562172 | 0.7369715375365402 | 0.4737760782952236 | F | F | F |
| 0.4891830112588380 | 0.7703304059322917 | 0.4737760782952236 | F | F | F |
| 0.7384810650628779 | 0.4876078378172437 | 0.4737760782952236 | F | F | F |
| 0.7594515692870303 | 0.0043185196671395 | 0.6404052302013943 | T | T | T |
| 0.9087543013287768 | 0.6511565474803067 | 0.5887490266825043 | T | T | T |
| 0.4266473630154463 | 0.6809111302963092 | 0.5848514020974759 | T | T | T |
| 0.9273972395720465 | 0.1769327873294243 | 0.5822797543475280 | T | T | T |
| 0.4032505468163085 | 0.1554245700112624 | 0.5911171316599533 | T | T | T |
| 0.2461787461690342 | 0.7457531024300057 | 0.6374428077061062 | T | T | T |
| 0.4420306432936768 | 0.9045909208053698 | 0.5892801102250066 | T | T | T |
| 0.8965809881211657 | 0.4256206471509675 | 0.5824294050378225 | T | T | T |
| 0.7647113291210801 | 0.2513975489994284 | 0.6471960669437496 | T | T | T |
| 0.8927638444792643 | 0.9271563481491457 | 0.5820853863254295 | T | T | T |

|                    |                    |                    |   |   |   |
|--------------------|--------------------|--------------------|---|---|---|
| 0.4404190619742592 | 0.3994810247203209 | 0.5906339827678015 | T | T | T |
| 0.2269693495104775 | 0.2451612666469880 | 0.6420240106433888 | T | T | T |
| 0.0071483848677717 | 0.2384593857620086 | 0.6398149469652602 | T | T | T |
| 0.6514971261614607 | 0.4407162709312228 | 0.5896628049022397 | T | T | T |
| 0.6785725273495288 | 0.8932220046357313 | 0.5814206236462143 | T | T | T |
| 0.1756572851715095 | 0.8927607335816647 | 0.5820027570612868 | T | T | T |
| 0.1571767233835488 | 0.4338019159743485 | 0.5912552514154118 | T | T | T |
| 0.5157877871084732 | 0.2239171837579353 | 0.6415369248528786 | T | T | T |
| 0.6715480922534043 | 0.6642973880174555 | 0.5839904993560395 | T | T | T |
| 0.0078354381935944 | 0.5043097481938064 | 0.6458078360261473 | T | T | T |
| 0.6679939895612809 | 0.1642142392533261 | 0.5867188622489010 | T | T | T |
| 0.4808548844434271 | 0.5246386658436897 | 0.6416670801482397 | T | T | T |
| 0.1664396787088717 | 0.1617975281910430 | 0.5865839126667889 | T | T | T |
| 0.5087224533938010 | 0.9930876692470344 | 0.6428237721584494 | T | T | T |
| 0.1621404419261193 | 0.6658004562007656 | 0.5858387243974045 | T | T | T |
| 0.2469011127737082 | 0.9908988548561058 | 0.6542206123797170 | T | T | T |
| 0.2622342020735286 | 0.5093151833944713 | 0.6390808538698181 | T | T | T |
| 0.9938695842423151 | 0.7651393314316415 | 0.6499121640159220 | T | T | T |
| 0.2277315647397131 | 0.2604833434644362 | 0.4659634882203321 | F | F | F |
| 0.5107495099301005 | 0.2271244581119447 | 0.4659634882203321 | F | F | F |
| 0.2614514102691530 | 0.5098470890666533 | 0.4659634882203321 | F | F | F |
| 0.0000000000000000 | 0.0000000000000000 | 0.4698697815641637 | F | F | F |
| 0.7408382941824878 | 0.4974161477489544 | 0.6474635741816408 | T | T | T |
| 0.7764096340968257 | 0.7389337472739110 | 0.6445291293738359 | T | T | T |
| 0.5004791463205567 | 0.7627549875119133 | 0.6454276789296625 | T | T | T |
| 0.0034218229003757 | 0.9952871826982007 | 0.6431318955341673 | T | T | T |
| 0.8159599359379399 | 0.8579122813819282 | 0.4853073788173816 | F | F | F |
| 0.3952951534094780 | 0.9363767461815229 | 0.4577430201053687 | F | F | F |
| 0.9176869787037418 | 0.1541639962793013 | 0.4492957297685578 | F | F | F |
| 0.1695994874784077 | 0.4323415158892061 | 0.4596076389699917 | F | F | F |
| 0.3245503040634432 | 0.8138816341340984 | 0.4853073788173816 | F | F | F |
| 0.6662166882857647 | 0.3936186536121724 | 0.4577430201053687 | F | F | F |
| 0.9266394692931357 | 0.9163920824521128 | 0.4492957297685578 | F | F | F |
| 0.3969640192055408 | 0.1688408520964444 | 0.4596076389699917 | F | F | F |
| 0.8593547298765358 | 0.3231158657700490 | 0.4853073788173816 | F | F | F |
| 0.9383531281826833 | 0.6649143814923804 | 0.4577430201053687 | F | F | F |
| 0.1555385218810557 | 0.9243537025546544 | 0.4492957297685578 | F | F | F |
| 0.4333689782550181 | 0.3962725226573838 | 0.4596076389699917 | F | F | F |
| 0.1839725646666253 | 0.1395426248879019 | 0.4544321788212997 | F | F | F |
| 0.6046373471950943 | 0.0610781600883072 | 0.4819965375333126 | F | F | F |
| 0.0822455252339367 | 0.8432909133153856 | 0.4904438267021192 | F | F | F |
| 0.8303330131261575 | 0.5651133903806240 | 0.4801319186686825 | F | F | F |
| 0.6753821496046513 | 0.1835732721357388 | 0.4544321788212997 | F | F | F |
| 0.3337157653823439 | 0.6038362526576577 | 0.4819965375333126 | F | F | F |

|                    |                    |                    |   |   |   |
|--------------------|--------------------|--------------------|---|---|---|
| 0.0732929777215929 | 0.0810628271425600 | 0.4904438267021192 | F | F | F |
| 0.6029684344625679 | 0.8286140541733857 | 0.4801319186686825 | F | F | F |
| 0.1405777706676758 | 0.6743389936194006 | 0.4544321788212997 | F | F | F |
| 0.0615793723615283 | 0.3325404778970764 | 0.4819965375333126 | F | F | F |
| 0.8443939819834299 | 0.0731011501850887 | 0.4904438267021192 | F | F | F |
| 0.5665635222892007 | 0.6011823367320730 | 0.4801319186686825 | F | F | F |
| 0.5157033466994037 | 0.4720642166451867 | 0.5128125034488065 | F | F | F |
| 0.9382155266378476 | 0.3935697119943384 | 0.5402222571510507 | F | F | F |
| 0.4134764846239136 | 0.1788316355844657 | 0.5490782248169097 | F | F | F |
| 0.1652727673189958 | 0.8968637606432637 | 0.5386393295024519 | F | F | F |
| 0.0115860744760994 | 0.5144800304850392 | 0.5128125034488065 | F | F | F |
| 0.6667529985908658 | 0.9365882393736200 | 0.5402222571510507 | F | F | F |
| 0.4068878560599956 | 0.4127524079384770 | 0.5490782248169097 | F | F | F |
| 0.9354527360783820 | 0.1639219592684142 | 0.5386393295024519 | F | F | F |
| 0.4726430637634564 | 0.0109106435128155 | 0.5128125034488065 | F | F | F |
| 0.3948964446492127 | 0.6647518299181101 | 0.5402222571510507 | F | F | F |
| 0.1795681442550503 | 0.4058708471200845 | 0.5490782248169097 | F | F | F |
| 0.8991394664805483 | 0.9341240613744048 | 0.5386393295024519 | F | F | F |
| 0.1502529583315635 | 0.1927478839608767 | 0.5438600605743957 | F | F | F |
| 0.7266414664239278 | 0.2718121688495998 | 0.5161713476883989 | F | F | F |
| 0.2526104716998674 | 0.4861492806533860 | 0.5077022588577265 | F | F | F |
| 0.5025193335949325 | 0.7654379243932397 | 0.5178780203333417 | F | F | F |
| 0.6558578905342074 | 0.1498255430760409 | 0.5438600605743957 | F | F | F |
| 0.0011533585709813 | 0.7254235855908746 | 0.5161713476883989 | F | F | F |
| 0.2602568251204715 | 0.2516834436997044 | 0.5077022588577265 | F | F | F |
| 0.7300539366250547 | 0.5009345144027506 | 0.5178780203333417 | F | F | F |
| 0.1938216360732028 | 0.6548814636061238 | 0.5438600605743957 | F | F | F |
| 0.2721376599440504 | 0.0002191362025528 | 0.5161713476883989 | F | F | F |
| 0.4870651881186276 | 0.2596221662899509 | 0.5077022588577265 | F | F | F |
| 0.7672916996579389 | 0.7285373424900783 | 0.5178780203333417 | F | F | F |
| 0.8212940423090315 | 0.8443458069937413 | 0.6579514730303953 | T | T | T |
| 0.8506443415565388 | 0.8042666300482042 | 0.5704343301163063 | T | T | T |
| 0.2632518250693922 | 0.7285252035395261 | 0.5944166825044234 | T | T | T |
| 0.4028085822935220 | 0.9257441630948600 | 0.6335217797292505 | T | T | T |
| 0.7504152493636542 | 0.5132320844188983 | 0.6076214368291319 | T | T | T |
| 0.9234218916947032 | 0.1468757119649064 | 0.6250245592544904 | T | T | T |
| 0.5001761651357989 | 0.2272270939472663 | 0.5974609527117195 | T | T | T |
| 0.1797259858159887 | 0.4249687769537400 | 0.6363877579748147 | T | T | T |
| 0.4096702750723903 | 0.6986157175598083 | 0.6296691860850507 | T | T | T |
| 0.3445436370231969 | 0.8492068091293199 | 0.5713810631329808 | T | T | T |
| 0.9986838858000309 | 0.2694168370513745 | 0.5975297185016522 | T | T | T |
| 0.6532753322132147 | 0.4135427098835505 | 0.6321127355536235 | T | T | T |
| 0.7429742102539978 | 0.7465458759216251 | 0.6056862625214642 | T | T | T |
| 0.9266210350130666 | 0.9230855537744462 | 0.6250056466849608 | T | T | T |

|                    |                    |                    |   |   |   |
|--------------------|--------------------|--------------------|---|---|---|
| 0.2674110287146617 | 0.4948432503234935 | 0.5961005443099053 | T | T | T |
| 0.3966407798267541 | 0.1657568285923083 | 0.6352964308716391 | T | T | T |
| 0.8487329286688652 | 0.3404068697465880 | 0.6536400835210578 | T | T | T |
| 0.8052305866301247 | 0.3446013092481987 | 0.5712501401247033 | T | T | T |
| 0.7302969707189511 | 0.9961633160722952 | 0.5980779874167690 | T | T | T |
| 0.9349294364890131 | 0.6699630781544077 | 0.6291910486446802 | T | T | T |
| 0.5305317346644060 | 0.7450555421556094 | 0.6058316450626122 | T | T | T |
| 0.1480194737422169 | 0.9269821157181748 | 0.6241041671857310 | T | T | T |
| 0.2316272119268969 | 0.2644760289304564 | 0.5980077340022635 | T | T | T |
| 0.4367137514501866 | 0.3946803563041715 | 0.6336626034372541 | T | T | T |
| 0.4796721448678302 | 0.5220897807944243 | 0.5985445358155711 | T | T | T |
| 0.1754096983741834 | 0.1304719108164899 | 0.6284081896825514 | T | T | T |
| 0.6043279836389633 | 0.0566768324806841 | 0.6541859923763181 | T | T | T |
| 0.0632435276042607 | 0.6000295190362327 | 0.5737352997158808 | T | T | T |
| 0.0620660238673678 | 0.8696853231338313 | 0.6686046414564060 | T | T | T |
| 0.5884249549291004 | 0.8203176329351883 | 0.5647346533118572 | T | T | T |
| 0.8312203517219424 | 0.5811993676598922 | 0.6544261173220797 | T | T | T |
| 0.8363208107801257 | 0.0992090049403220 | 0.5759550940534223 | T | T | T |
| 0.9935412383584992 | 0.4804547115948570 | 0.6023898654929690 | T | T | T |
| 0.6857579868922717 | 0.1771978017974930 | 0.6288878614756496 | T | T | T |
| 0.3249789630277173 | 0.5919865255246463 | 0.6579903031729882 | T | T | T |
| 0.3329226577006034 | 0.0611945906404788 | 0.5744694373429672 | T | T | T |
| 0.0566711817009969 | 0.0905660624640831 | 0.6654335276689892 | T | T | T |
| 0.5920968071330107 | 0.5867227748747729 | 0.5660073551408383 | T | T | T |
| 0.6153593486955454 | 0.8233362962035017 | 0.6522646425500681 | T | T | T |
| 0.0593250664645320 | 0.8362521435448159 | 0.5757056013776245 | T | T | T |
| 0.5262295022518786 | 0.9895700898635668 | 0.6005602002131782 | T | T | T |
| 0.1382021045101055 | 0.6818001946040825 | 0.6283125479315256 | T | T | T |
| 0.0647981201755136 | 0.3378404858596844 | 0.6552660933839715 | T | T | T |
| 0.6072516197959419 | 0.3287187827023522 | 0.5743212555675457 | T | T | T |
| 0.8509905269663064 | 0.0730744505252291 | 0.6642834109341880 | T | T | T |
| 0.8251042459135226 | 0.5885799422136361 | 0.5654050131715944 | T | T | T |
| 0.6106406209364085 | 0.4759675339271603 | 0.7018846712111975 | T | T | T |
| 0.0987882800902059 | 0.0621187839282943 | 0.5756051381683460 | T | T | T |
| 0.6855630306609791 | 0.2870265539733598 | 0.6846253280520238 | T | T | T |
| 0.0447461383780459 | 0.6125128663801168 | 0.6717507465707303 | T | T | T |
| 0.2862339313874961 | 0.1065742368749756 | 0.6719215447826525 | T | T | T |
| 0.5268532378448033 | 0.2605956207468352 | 0.6811848046920513 | T | T | T |
| 0.8549860265194245 | 0.0635757214588448 | 0.6830109156885100 | T | T | T |
| 0.6581857476753874 | 0.3628920297922014 | 0.6915217499348839 | T | T | T |
| 0.0559674590427289 | 0.6048634531021311 | 0.6903633064333689 | T | T | T |
| 0.2791022983778780 | 0.1172934316106069 | 0.6905592715342350 | T | T | T |
| 0.6194045145209509 | 0.2760381318978434 | 0.6839136647632056 | T | T | T |
| 0.5463128192570437 | 0.1949381206852071 | 0.6901934931197509 | T | T | T |



|                    |                    |                    |   |   |   |
|--------------------|--------------------|--------------------|---|---|---|
| 0.0466515221479944 | 0.0914440372577379 | 0.6841100817544107 | T | T | T |
| 0.6588714767034789 | 0.4765003708057190 | 0.7147914117686494 | T | T | T |
| 0.5767948984384592 | 0.6001983009527313 | 0.6763157669522301 | T | T | T |
| 0.4056483182874258 | 0.7967641302485556 | 0.6897667443983330 | T | T | T |
| 0.2157890074590023 | 0.8504775138985079 | 0.6799668511032677 | T | T | T |

Best + 2:

In Sn O Pt H

1.0000000000000000

14.6581653332033461 0.0000000000000000 0.0000000000000000

7.3189795989957736 12.7095316657975506 0.0000000000000000

-0.0098891034462902 -0.0168642175486257 51.7150080587397056

In Sn O Pt H

56 8 100 3 8

Selective dynamics

Direct

|                    |                    |                    |   |   |   |
|--------------------|--------------------|--------------------|---|---|---|
| 0.7601334683925316 | 0.0111196284508281 | 0.4659634855339050 | F | F | F |
| 0.2397990222127078 | 0.9863352678444528 | 0.4737760756088107 | F | F | F |
| 0.7715588052310096 | 0.2382440998621718 | 0.4737760756088107 | F | F | F |
| 0.0114253481492099 | 0.2271244657591041 | 0.4659634855339050 | F | F | F |
| 0.9885071424342016 | 0.7703304135794511 | 0.4737760756088107 | F | F | F |
| 0.9992903736448469 | 0.4987274529686729 | 0.4698697869370179 | F | F | F |
| 0.5006083460974438 | 0.9974548753487298 | 0.4698697869370179 | F | F | F |
| 0.5711026190239110 | 0.3212438999490672 | 0.5325343176450374 | F | F | F |
| 0.0957701894278102 | 0.3438156643639090 | 0.5244126049570497 | F | F | F |
| 0.5954002788407777 | 0.8428761420777775 | 0.5239512181533499 | F | F | F |
| 0.0723457897014868 | 0.8193845017652066 | 0.5323927895013369 | F | F | F |
| 0.1070648802758711 | 0.5700070441001301 | 0.5325343176450374 | F | F | F |
| 0.5592163182809529 | 0.0952136194229070 | 0.5244126049570497 | F | F | F |
| 0.5598611324288072 | 0.5936048851403370 | 0.5239512181533499 | F | F | F |
| 0.1070842580214730 | 0.0712056639447667 | 0.5323927895013369 | F | F | F |
| 0.3217649856391844 | 0.1062039465938440 | 0.5325343176450374 | F | F | F |
| 0.3449459772301964 | 0.5584256068562183 | 0.5244126049570497 | F | F | F |
| 0.8446035586083482 | 0.5584287540679753 | 0.5239512181533499 | F | F | F |
| 0.8205024372159997 | 0.1068647249330610 | 0.5323927895013369 | F | F | F |
| 0.3340676120032526 | 0.8312648480018296 | 0.5281957169818696 | F | F | F |
| 0.8324680001261981 | 0.3325994467597084 | 0.5281957169818696 | F | F | F |
| 0.3333108283129889 | 0.3324849635476852 | 0.5286123655445181 | F | F | F |
| 0.8333293577484682 | 0.8310454865245305 | 0.5281957169818696 | F | F | F |
| 0.2283736683972180 | 0.7592107964331092 | 0.4659634855339050 | F | F | F |
| 0.4999662501356283 | 0.4987274529686729 | 0.4698697869370179 | F | F | F |
| 0.7722008935562172 | 0.7369715375365402 | 0.4737760782952236 | F | F | F |
| 0.4891830112588380 | 0.7703304059322917 | 0.4737760782952236 | F | F | F |

|                    |                    |                    |   |   |   |
|--------------------|--------------------|--------------------|---|---|---|
| 0.7384810650628779 | 0.4876078378172437 | 0.4737760782952236 | F | F | F |
| 0.7569923487183131 | 0.0067499757713132 | 0.6398957778431305 | T | T | T |
| 0.9074604053814609 | 0.6502270039263570 | 0.5890223560627926 | T | T | T |
| 0.4271218043470404 | 0.6760470888714786 | 0.5823900458543392 | T | T | T |
| 0.2363851390979918 | 0.9833598864782317 | 0.6490809295913149 | T | T | T |
| 0.9271726667415029 | 0.1769385303871847 | 0.5823523177719196 | T | T | T |
| 0.4040453891459747 | 0.1565715846380559 | 0.5905953498449029 | T | T | T |
| 0.2609337448287635 | 0.5135249277774632 | 0.6409874601197743 | T | T | T |
| 0.2345068922303008 | 0.7522608203100986 | 0.6380604215281909 | T | T | T |
| 0.4405297622996212 | 0.9060620661788277 | 0.5893254622777325 | T | T | T |
| 0.8944235677817736 | 0.4236031596641937 | 0.5821172068606861 | T | T | T |
| 0.7627572364582773 | 0.2504873265733364 | 0.6490225960977016 | T | T | T |
| 0.8934103202557253 | 0.9278388965902228 | 0.5820213218800048 | T | T | T |
| 0.4399060856211927 | 0.4052838749220860 | 0.5913871470679946 | T | T | T |
| 0.2231121698455812 | 0.2598470983124324 | 0.6383052410936827 | T | T | T |
| 0.0151719858906235 | 0.2224857961125580 | 0.6411010971764604 | T | T | T |
| 0.6517035300414639 | 0.4421518282195718 | 0.5899994496040549 | T | T | T |
| 0.6798127434353703 | 0.8924101052272788 | 0.5813493359169271 | T | T | T |
| 0.9852460687152833 | 0.7691069184845469 | 0.6483436053757835 | T | T | T |
| 0.1775352787245532 | 0.8913057775146638 | 0.5816936015755694 | T | T | T |
| 0.1580276854051223 | 0.4385423759550690 | 0.5905208420154210 | T | T | T |
| 0.5150660674475623 | 0.2240710754563993 | 0.6412684659063120 | T | T | T |
| 0.6679988481544948 | 0.6642363784719505 | 0.5855428833061720 | T | T | T |
| 0.9971671319907395 | 0.4894456930646911 | 0.6422280820572567 | T | T | T |
| 0.6670699625660214 | 0.1658289038118154 | 0.5865033457019257 | T | T | T |
| 0.4992805675548034 | 0.4950497993868438 | 0.6481846340413189 | T | T | T |
| 0.1659365263397835 | 0.1633053239403965 | 0.5862288679238802 | T | T | T |
| 0.5121411024728447 | 0.9968269443770239 | 0.6421410982667526 | T | T | T |
| 0.1648733853566618 | 0.6656183183904454 | 0.5861155713418612 | T | T | T |
| 0.2277315647397131 | 0.2604833434644362 | 0.4659634882203321 | F | F | F |
| 0.5107495099301005 | 0.2271244581119447 | 0.4659634882203321 | F | F | F |
| 0.2614514102691530 | 0.5098470890666533 | 0.4659634882203321 | F | F | F |
| 0.0000000000000000 | 0.0000000000000000 | 0.4698697815641637 | F | F | F |
| 0.7446457736333916 | 0.4854669268804007 | 0.6488385505553209 | T | T | T |
| 0.7727256851904489 | 0.7349884301843836 | 0.6453103664246965 | T | T | T |
| 0.4878325551203005 | 0.7843257138304086 | 0.6457242278936418 | T | T | T |
| 0.9989787064526853 | 0.0039919838759510 | 0.6428247520311541 | T | T | T |
| 0.8159599359379399 | 0.8579122813819282 | 0.4853073788173816 | F | F | F |
| 0.3952951534094780 | 0.9363767461815229 | 0.4577430201053687 | F | F | F |
| 0.9176869787037418 | 0.1541639962793013 | 0.4492957297685578 | F | F | F |
| 0.1695994874784077 | 0.4323415158892061 | 0.4596076389699917 | F | F | F |
| 0.3245503040634432 | 0.8138816341340984 | 0.4853073788173816 | F | F | F |
| 0.6662166882857647 | 0.3936186536121724 | 0.4577430201053687 | F | F | F |
| 0.9266394692931357 | 0.9163920824521128 | 0.4492957297685578 | F | F | F |

|                    |                    |                    |   |   |   |
|--------------------|--------------------|--------------------|---|---|---|
| 0.3969640192055408 | 0.1688408520964444 | 0.4596076389699917 | F | F | F |
| 0.8593547298765358 | 0.3231158657700490 | 0.4853073788173816 | F | F | F |
| 0.9383531281826833 | 0.6649143814923804 | 0.4577430201053687 | F | F | F |
| 0.1555385218810557 | 0.9243537025546544 | 0.4492957297685578 | F | F | F |
| 0.4333689782550181 | 0.3962725226573838 | 0.4596076389699917 | F | F | F |
| 0.1839725646666253 | 0.1395426248879019 | 0.4544321788212997 | F | F | F |
| 0.6046373471950943 | 0.0610781600883072 | 0.4819965375333126 | F | F | F |
| 0.0822455252339367 | 0.8432909133153856 | 0.4904438267021192 | F | F | F |
| 0.8303330131261575 | 0.5651133903806240 | 0.4801319186686825 | F | F | F |
| 0.6753821496046513 | 0.1835732721357388 | 0.4544321788212997 | F | F | F |
| 0.3337157653823439 | 0.6038362526576577 | 0.4819965375333126 | F | F | F |
| 0.0732929777215929 | 0.0810628271425600 | 0.4904438267021192 | F | F | F |
| 0.6029684344625679 | 0.8286140541733857 | 0.4801319186686825 | F | F | F |
| 0.1405777706676758 | 0.6743389936194006 | 0.4544321788212997 | F | F | F |
| 0.0615793723615283 | 0.3325404778970764 | 0.4819965375333126 | F | F | F |
| 0.8443939819834299 | 0.0731011501850887 | 0.4904438267021192 | F | F | F |
| 0.5665635222892007 | 0.6011823367320730 | 0.4801319186686825 | F | F | F |
| 0.5157033466994037 | 0.4720642166451867 | 0.5128125034488065 | F | F | F |
| 0.9382155266378476 | 0.3935697119943384 | 0.5402222571510507 | F | F | F |
| 0.4134764846239136 | 0.1788316355844657 | 0.5490782248169097 | F | F | F |
| 0.1652727673189958 | 0.8968637606432637 | 0.5386393295024519 | F | F | F |
| 0.0115860744760994 | 0.5144800304850392 | 0.5128125034488065 | F | F | F |
| 0.6667529985908658 | 0.9365882393736200 | 0.5402222571510507 | F | F | F |
| 0.4068878560599956 | 0.4127524079384770 | 0.5490782248169097 | F | F | F |
| 0.9354527360783820 | 0.1639219592684142 | 0.5386393295024519 | F | F | F |
| 0.4726430637634564 | 0.0109106435128155 | 0.5128125034488065 | F | F | F |
| 0.3948964446492127 | 0.6647518299181101 | 0.5402222571510507 | F | F | F |
| 0.1795681442550503 | 0.4058708471200845 | 0.5490782248169097 | F | F | F |
| 0.8991394664805483 | 0.9341240613744048 | 0.5386393295024519 | F | F | F |
| 0.1502529583315635 | 0.1927478839608767 | 0.5438600605743957 | F | F | F |
| 0.7266414664239278 | 0.2718121688495998 | 0.5161713476883989 | F | F | F |
| 0.2526104716998674 | 0.4861492806533860 | 0.5077022588577265 | F | F | F |
| 0.5025193335949325 | 0.7654379243932397 | 0.5178780203333417 | F | F | F |
| 0.6558578905342074 | 0.1498255430760409 | 0.5438600605743957 | F | F | F |
| 0.0011533585709813 | 0.7254235855908746 | 0.5161713476883989 | F | F | F |
| 0.2602568251204715 | 0.2516834436997044 | 0.5077022588577265 | F | F | F |
| 0.7300539366250547 | 0.5009345144027506 | 0.5178780203333417 | F | F | F |
| 0.1938216360732028 | 0.6548814636061238 | 0.5438600605743957 | F | F | F |
| 0.2721376599440504 | 0.0002191362025528 | 0.5161713476883989 | F | F | F |
| 0.4870651881186276 | 0.2596221662899509 | 0.5077022588577265 | F | F | F |
| 0.7672916996579389 | 0.7285373424900783 | 0.5178780203333417 | F | F | F |
| 0.8131697652910373 | 0.8474460375119375 | 0.6555163536230304 | T | T | T |
| 0.8512529786777592 | 0.8037281629979278 | 0.5708992956539053 | T | T | T |
| 0.2695550711729965 | 0.7265392999468510 | 0.5960640849006354 | T | T | T |

|                    |                    |                    |   |   |   |
|--------------------|--------------------|--------------------|---|---|---|
| 0.4038243940953292 | 0.9409300704171443 | 0.6327278407466165 | T | T | T |
| 0.7495572686069564 | 0.5144872676861995 | 0.6084909240704884 | T | T | T |
| 0.9133228721702934 | 0.1490178599105481 | 0.6242632361859370 | T | T | T |
| 0.4981218072009991 | 0.2311653316908549 | 0.5976272584740348 | T | T | T |
| 0.1697701268083285 | 0.4332942417558199 | 0.6350070667943652 | T | T | T |
| 0.3353463850175157 | 0.8126264755432844 | 0.6455546068196406 | T | T | T |
| 0.3451755608934588 | 0.8481619355715049 | 0.5711910721938952 | T | T | T |
| 0.0002381797973424 | 0.2668760222250193 | 0.5984843501018418 | T | T | T |
| 0.6630339803462634 | 0.4097269296916106 | 0.6311652843712080 | T | T | T |
| 0.7431399881686970 | 0.7444032984440838 | 0.6061324879968099 | T | T | T |
| 0.9258467546829905 | 0.9254792776328572 | 0.6256263011389047 | T | T | T |
| 0.2693261640060746 | 0.4972611106513519 | 0.5971447114451668 | T | T | T |
| 0.3926238339846736 | 0.1702691276317143 | 0.6366528954198475 | T | T | T |
| 0.8583254663800530 | 0.3293126653320435 | 0.6535079783069733 | T | T | T |
| 0.8045236908153589 | 0.3438568094322035 | 0.5712034258833690 | T | T | T |
| 0.7302365397489209 | 0.9970741012523502 | 0.5977582824258747 | T | T | T |
| 0.9370721146576493 | 0.6584327423825918 | 0.6319218492520785 | T | T | T |
| 0.5159769121002058 | 0.7383613450936620 | 0.6071126129318691 | T | T | T |
| 0.1409875538439803 | 0.9234006456950015 | 0.6231319688248776 | T | T | T |
| 0.2327324262904196 | 0.2679673422216098 | 0.5960178612359475 | T | T | T |
| 0.4321864275078953 | 0.3926202744741619 | 0.6352611220443272 | T | T | T |
| 0.4815996272926143 | 0.5271462579481165 | 0.6029112847941558 | T | T | T |
| 0.1863072381432027 | 0.1319928131794647 | 0.6286413204794871 | T | T | T |
| 0.6028982144927570 | 0.0610869869862144 | 0.6556457721458813 | T | T | T |
| 0.0626801934413335 | 0.6024855553533270 | 0.5742936527372569 | T | T | T |
| 0.0759702579287752 | 0.8542338602539773 | 0.6642333540239744 | T | T | T |
| 0.5871504582915332 | 0.8189194208494419 | 0.5658097339973870 | T | T | T |
| 0.8265276102828301 | 0.5734418705105871 | 0.6547898781562708 | T | T | T |
| 0.8357331400093744 | 0.0994324814938643 | 0.5757718987505527 | T | T | T |
| 0.9935355507797766 | 0.4771040050744068 | 0.6002572626760452 | T | T | T |
| 0.6836943511235922 | 0.1772425010531127 | 0.6287887436752151 | T | T | T |
| 0.3342232124109572 | 0.6004200392808228 | 0.6543570347613663 | T | T | T |
| 0.3327603824232124 | 0.0619769700098487 | 0.5745677215362639 | T | T | T |
| 0.0680730302812833 | 0.0735255949387575 | 0.6628823411640988 | T | T | T |
| 0.5917496638604917 | 0.5860486217882269 | 0.5659404212920466 | T | T | T |
| 0.6095131068919039 | 0.8248300483640983 | 0.6507415629068047 | T | T | T |
| 0.0613754254346862 | 0.8349567132217012 | 0.5760476495756423 | T | T | T |
| 0.5276616074162753 | 0.9925620136404495 | 0.5999827449980075 | T | T | T |
| 0.1350508387867456 | 0.6804221239859793 | 0.6286586993050201 | T | T | T |
| 0.0693797699594138 | 0.3291090509092570 | 0.6555000671092602 | T | T | T |
| 0.6042347218747124 | 0.3328002956342743 | 0.5747202259598780 | T | T | T |
| 0.8515691649449134 | 0.0718557669897241 | 0.6659233766001265 | T | T | T |
| 0.8215438601501840 | 0.5892761261462645 | 0.5657362936249639 | T | T | T |
| 0.5248176221526726 | 0.2515261739026352 | 0.6834610455141720 | T | T | T |

|                    |                    |                    |   |   |   |
|--------------------|--------------------|--------------------|---|---|---|
| 0.1000029200453891 | 0.0612700216099609 | 0.5758395528668141 | T | T | T |
| 0.2979967066744023 | 0.9666151074684970 | 0.6870315814723231 | T | T | T |
| 0.2058583283508669 | 0.5213845550272045 | 0.6827740716512533 | T | T | T |
| 0.0373237786817793 | 0.6948606898055797 | 0.6856374794557284 | T | T | T |
| 0.4771984318538147 | 0.7866970618395717 | 0.6872434975767691 | T | T | T |
| 0.6830007386433804 | 0.4466876723055058 | 0.6933512948457153 | T | T | T |
| 0.6063384443436297 | 0.3321611751853989 | 0.6842067229763765 | T | T | T |
| 0.5557706393524753 | 0.6268335650513447 | 0.6781081758116370 | T | T | T |
| 0.2400622912487702 | 0.0000374275361777 | 0.6992767661117391 | T | T | T |
| 0.5678495361351076 | 0.1783265147171552 | 0.6891000852631399 | T | T | T |
| 0.1338127297200848 | 0.5929836309434035 | 0.6854516948028020 | T | T | T |
| 0.1909082267809649 | 0.4648426529136253 | 0.6861752884059898 | T | T | T |
| 0.9801411287469441 | 0.7013479073072230 | 0.6964540318795426 | T | T | T |
| 0.0802429477157767 | 0.8483545119845904 | 0.6830591837448777 | T | T | T |
| 0.3990734920270610 | 0.8353048768789496 | 0.6901979525561212 | T | T | T |
| 0.8582940818756084 | 0.0641517794850747 | 0.6846888783502475 | T | T | T |

Best + 3:

In Sn O H Pt

1.0000000000000000

14.6581653332033461 0.0000000000000000 0.0000000000000000

7.3189795989957736 12.7095316657975506 0.0000000000000000

-0.0098891034462902 -0.0168642175486257 51.7150080587397056

In Sn O H Pt

56 8 100 8 3

Selective dynamics

Direct

|                    |                    |                    |   |   |   |
|--------------------|--------------------|--------------------|---|---|---|
| 0.7601334683925316 | 0.0111196284508281 | 0.4659634855339050 | F | F | F |
| 0.2397990222127078 | 0.9863352678444528 | 0.4737760756088107 | F | F | F |
| 0.7715588052310096 | 0.2382440998621718 | 0.4737760756088107 | F | F | F |
| 0.0114253481492099 | 0.2271244657591041 | 0.4659634855339050 | F | F | F |
| 0.9885071424342016 | 0.7703304135794511 | 0.4737760756088107 | F | F | F |
| 0.9992903736448469 | 0.4987274529686729 | 0.4698697869370179 | F | F | F |
| 0.5006083460974438 | 0.9974548753487298 | 0.4698697869370179 | F | F | F |
| 0.5711026190239110 | 0.3212438999490672 | 0.5325343176450374 | F | F | F |
| 0.0957701894278102 | 0.3438156643639090 | 0.5244126049570497 | F | F | F |
| 0.5954002788407777 | 0.8428761420777775 | 0.5239512181533499 | F | F | F |
| 0.0723457897014868 | 0.8193845017652066 | 0.5323927895013369 | F | F | F |
| 0.1070648802758711 | 0.5700070441001301 | 0.5325343176450374 | F | F | F |
| 0.5592163182809529 | 0.0952136194229070 | 0.5244126049570497 | F | F | F |
| 0.5598611324288072 | 0.5936048851403370 | 0.5239512181533499 | F | F | F |
| 0.1070842580214730 | 0.0712056639447667 | 0.5323927895013369 | F | F | F |
| 0.3217649856391844 | 0.1062039465938440 | 0.5325343176450374 | F | F | F |

|                    |                    |                    |   |   |   |
|--------------------|--------------------|--------------------|---|---|---|
| 0.3449459772301964 | 0.5584256068562183 | 0.5244126049570497 | F | F | F |
| 0.8446035586083482 | 0.5584287540679753 | 0.5239512181533499 | F | F | F |
| 0.8205024372159997 | 0.1068647249330610 | 0.5323927895013369 | F | F | F |
| 0.3340676120032526 | 0.8312648480018296 | 0.5281957169818696 | F | F | F |
| 0.8324680001261981 | 0.3325994467597084 | 0.5281957169818696 | F | F | F |
| 0.3333108283129889 | 0.3324849635476852 | 0.5286123655445181 | F | F | F |
| 0.8333293577484682 | 0.8310454865245305 | 0.5281957169818696 | F | F | F |
| 0.2283736683972180 | 0.7592107964331092 | 0.4659634855339050 | F | F | F |
| 0.4999662501356283 | 0.4987274529686729 | 0.4698697869370179 | F | F | F |
| 0.7722008935562172 | 0.7369715375365402 | 0.4737760782952236 | F | F | F |
| 0.4891830112588380 | 0.7703304059322917 | 0.4737760782952236 | F | F | F |
| 0.7384810650628779 | 0.4876078378172437 | 0.4737760782952236 | F | F | F |
| 0.7561305423953467 | 0.0063610052231044 | 0.6407329855816115 | T | T | T |
| 0.9091722074225976 | 0.6505001218420483 | 0.5895264640650625 | T | T | T |
| 0.4256305140434102 | 0.6788982472612642 | 0.5823822950632982 | T | T | T |
| 0.9266524939981303 | 0.1765962700666742 | 0.5822559774633644 | T | T | T |
| 0.4036488423052213 | 0.1547200452701933 | 0.5907877896589686 | T | T | T |
| 0.2338467476438207 | 0.7518585883712715 | 0.6407702059632087 | T | T | T |
| 0.4409270053868483 | 0.9038519427510699 | 0.5894613785101261 | T | T | T |
| 0.8963891763872089 | 0.4255688180834312 | 0.5813523116547571 | T | T | T |
| 0.7586769419924888 | 0.2527543126021289 | 0.6493993220983654 | T | T | T |
| 0.8943400336826105 | 0.9269385015242847 | 0.5826055955725544 | T | T | T |
| 0.4378081377608432 | 0.4040777619158802 | 0.5915058444314977 | T | T | T |
| 0.2259277805300508 | 0.2486322250836470 | 0.6407483277432879 | T | T | T |
| 0.0032099630807464 | 0.2398941287768763 | 0.6393208016115157 | T | T | T |
| 0.6519460563568813 | 0.4401554593034251 | 0.5890990599617475 | T | T | T |
| 0.6786445586454690 | 0.8938174910455146 | 0.5817349914058296 | T | T | T |
| 0.1769605850550372 | 0.8925885357138105 | 0.5825667081605953 | T | T | T |
| 0.1578814180902749 | 0.4355027121003000 | 0.5910644215586395 | T | T | T |
| 0.5112808822506213 | 0.2269324246696422 | 0.6405403615079552 | T | T | T |
| 0.6694207642866943 | 0.6651057686747329 | 0.5836044562523999 | T | T | T |
| 0.0035636619896068 | 0.4911909685756425 | 0.6450626351258948 | T | T | T |
| 0.6665541665630909 | 0.1655868965702317 | 0.5867171237337377 | T | T | T |
| 0.4970144409437811 | 0.5238746317729069 | 0.6440040074486987 | T | T | T |
| 0.1647692680438957 | 0.1663154834805664 | 0.5851966716469426 | T | T | T |
| 0.5039296794162569 | 0.9949604369957593 | 0.6439543347837492 | T | T | T |
| 0.1669100584502646 | 0.6649632504520182 | 0.5859078039183725 | T | T | T |
| 0.2380349525010239 | 0.0034435661461356 | 0.6486598359868131 | T | T | T |
| 0.2549581389305274 | 0.5100665639676932 | 0.6418063382285771 | T | T | T |
| 0.9902225120279555 | 0.7602634731902116 | 0.6502436722206717 | T | T | T |
| 0.2277315647397131 | 0.2604833434644362 | 0.4659634882203321 | F | F | F |
| 0.5107495099301005 | 0.2271244581119447 | 0.4659634882203321 | F | F | F |
| 0.2614514102691530 | 0.5098470890666533 | 0.4659634882203321 | F | F | F |
| 0.0000000000000000 | 0.0000000000000000 | 0.4698697815641637 | F | F | F |

|                    |                    |                    |   |   |   |
|--------------------|--------------------|--------------------|---|---|---|
| 0.7481252056135593 | 0.4896361090851744 | 0.6446273167990163 | T | T | T |
| 0.7725569165720207 | 0.7354182992546612 | 0.6453149120143102 | T | T | T |
| 0.5056476618359922 | 0.7553683239413954 | 0.6449524911850097 | T | T | T |
| 0.9966207347841662 | 0.0046593166879236 | 0.6456850688810690 | T | T | T |
| 0.8159599359379399 | 0.8579122813819282 | 0.4853073788173816 | F | F | F |
| 0.3952951534094780 | 0.9363767461815229 | 0.4577430201053687 | F | F | F |
| 0.9176869787037418 | 0.1541639962793013 | 0.4492957297685578 | F | F | F |
| 0.1695994874784077 | 0.4323415158892061 | 0.4596076389699917 | F | F | F |
| 0.3245503040634432 | 0.8138816341340984 | 0.4853073788173816 | F | F | F |
| 0.6662166882857647 | 0.3936186536121724 | 0.4577430201053687 | F | F | F |
| 0.9266394692931357 | 0.9163920824521128 | 0.4492957297685578 | F | F | F |
| 0.3969640192055408 | 0.1688408520964444 | 0.4596076389699917 | F | F | F |
| 0.8593547298765358 | 0.3231158657700490 | 0.4853073788173816 | F | F | F |
| 0.9383531281826833 | 0.6649143814923804 | 0.4577430201053687 | F | F | F |
| 0.1555385218810557 | 0.9243537025546544 | 0.4492957297685578 | F | F | F |
| 0.4333689782550181 | 0.3962725226573838 | 0.4596076389699917 | F | F | F |
| 0.1839725646666253 | 0.1395426248879019 | 0.4544321788212997 | F | F | F |
| 0.6046373471950943 | 0.0610781600883072 | 0.4819965375333126 | F | F | F |
| 0.0822455252339367 | 0.8432909133153856 | 0.4904438267021192 | F | F | F |
| 0.8303330131261575 | 0.5651133903806240 | 0.4801319186686825 | F | F | F |
| 0.6753821496046513 | 0.1835732721357388 | 0.4544321788212997 | F | F | F |
| 0.3337157653823439 | 0.6038362526576577 | 0.4819965375333126 | F | F | F |
| 0.0732929777215929 | 0.0810628271425600 | 0.4904438267021192 | F | F | F |
| 0.6029684344625679 | 0.8286140541733857 | 0.4801319186686825 | F | F | F |
| 0.1405777706676758 | 0.6743389936194006 | 0.4544321788212997 | F | F | F |
| 0.0615793723615283 | 0.3325404778970764 | 0.4819965375333126 | F | F | F |
| 0.8443939819834299 | 0.0731011501850887 | 0.4904438267021192 | F | F | F |
| 0.5665635222892007 | 0.6011823367320730 | 0.4801319186686825 | F | F | F |
| 0.5157033466994037 | 0.4720642166451867 | 0.5128125034488065 | F | F | F |
| 0.9382155266378476 | 0.3935697119943384 | 0.5402222571510507 | F | F | F |
| 0.4134764846239136 | 0.1788316355844657 | 0.5490782248169097 | F | F | F |
| 0.1652727673189958 | 0.8968637606432637 | 0.5386393295024519 | F | F | F |
| 0.0115860744760994 | 0.5144800304850392 | 0.5128125034488065 | F | F | F |
| 0.6667529985908658 | 0.9365882393736200 | 0.5402222571510507 | F | F | F |
| 0.4068878560599956 | 0.4127524079384770 | 0.5490782248169097 | F | F | F |
| 0.9354527360783820 | 0.1639219592684142 | 0.5386393295024519 | F | F | F |
| 0.4726430637634564 | 0.0109106435128155 | 0.5128125034488065 | F | F | F |
| 0.3948964446492127 | 0.6647518299181101 | 0.5402222571510507 | F | F | F |
| 0.1795681442550503 | 0.4058708471200845 | 0.5490782248169097 | F | F | F |
| 0.8991394664805483 | 0.9341240613744048 | 0.5386393295024519 | F | F | F |
| 0.1502529583315635 | 0.1927478839608767 | 0.5438600605743957 | F | F | F |
| 0.7266414664239278 | 0.2718121688495998 | 0.5161713476883989 | F | F | F |
| 0.2526104716998674 | 0.4861492806533860 | 0.5077022588577265 | F | F | F |
| 0.5025193335949325 | 0.7654379243932397 | 0.5178780203333417 | F | F | F |

|                    |                    |                    |   |   |   |
|--------------------|--------------------|--------------------|---|---|---|
| 0.6558578905342074 | 0.1498255430760409 | 0.5438600605743957 | F | F | F |
| 0.0011533585709813 | 0.7254235855908746 | 0.5161713476883989 | F | F | F |
| 0.2602568251204715 | 0.2516834436997044 | 0.5077022588577265 | F | F | F |
| 0.7300539366250547 | 0.5009345144027506 | 0.5178780203333417 | F | F | F |
| 0.1938216360732028 | 0.6548814636061238 | 0.5438600605743957 | F | F | F |
| 0.2721376599440504 | 0.0002191362025528 | 0.5161713476883989 | F | F | F |
| 0.4870651881186276 | 0.2596221662899509 | 0.5077022588577265 | F | F | F |
| 0.7672916996579389 | 0.7285373424900783 | 0.5178780203333417 | F | F | F |
| 0.8147754678922372 | 0.8457015481372994 | 0.6561528553924398 | T | T | T |
| 0.8505430321201660 | 0.8046003027792147 | 0.5712045962008662 | T | T | T |
| 0.2680512763458291 | 0.7311517904710635 | 0.5978160627811908 | T | T | T |
| 0.4009099380730991 | 0.9208918864457479 | 0.6347387892265954 | T | T | T |
| 0.7514560328853074 | 0.5124927675473447 | 0.6056791214398540 | T | T | T |
| 0.9215919096731787 | 0.1492921019692743 | 0.6261597590685265 | T | T | T |
| 0.4979585540948716 | 0.2298706165345650 | 0.5971640402115296 | T | T | T |
| 0.1749760728759268 | 0.4235195484088810 | 0.6351022972206353 | T | T | T |
| 0.3975985512003786 | 0.7059107293391212 | 0.6441653281487142 | T | T | T |
| 0.3438476064093043 | 0.8489603943392217 | 0.5712628255144628 | T | T | T |
| 0.9956147949942018 | 0.2703876415237789 | 0.5971501682068522 | T | T | T |
| 0.6623794785280631 | 0.4100437875224072 | 0.6315908561408633 | T | T | T |
| 0.7412845928990832 | 0.7453298960807758 | 0.6062692206969027 | T | T | T |
| 0.9309306119503962 | 0.9224878556772900 | 0.6271769476232485 | T | T | T |
| 0.2676468122374974 | 0.4969229469205597 | 0.5974760555020631 | T | T | T |
| 0.3948706335728286 | 0.1678343890996592 | 0.6350788602033333 | T | T | T |
| 0.8478922790072703 | 0.3394616063492188 | 0.6565128280100171 | T | T | T |
| 0.8043887479010825 | 0.3430065916014742 | 0.5709401527324524 | T | T | T |
| 0.7312258632086944 | 0.9968102834166638 | 0.5984422617024936 | T | T | T |
| 0.9359711716096737 | 0.6599869043465423 | 0.6318391480163756 | T | T | T |
| 0.5217651305842613 | 0.7372805707886207 | 0.6055719335284154 | T | T | T |
| 0.1521636256225192 | 0.9250299456908189 | 0.6287654460322147 | T | T | T |
| 0.2331027833911977 | 0.2656544927589187 | 0.5967574445178375 | T | T | T |
| 0.4311496374948199 | 0.4003302129631524 | 0.6346211766473827 | T | T | T |
| 0.4806306614795743 | 0.5284920626520309 | 0.6013817218045229 | T | T | T |
| 0.1725660500117001 | 0.1388103612989475 | 0.6257089859023860 | T | T | T |
| 0.6000413236733548 | 0.0595091232835070 | 0.6546622498315668 | T | T | T |
| 0.0636206799350729 | 0.6013067272723340 | 0.5742704177697096 | T | T | T |
| 0.0364852770897703 | 0.9430499270016611 | 0.6815880727578614 | T | T | T |
| 0.5868391740000908 | 0.8209438311229670 | 0.5653239926346579 | T | T | T |
| 0.8253593256397066 | 0.5730915898905611 | 0.6535853407002361 | T | T | T |
| 0.8359486460640621 | 0.0989775144973987 | 0.5764664525555852 | T | T | T |
| 0.9928617547975388 | 0.4786504253888693 | 0.6016957090386693 | T | T | T |
| 0.6798880919646373 | 0.1809955665866020 | 0.6289476608524914 | T | T | T |
| 0.4531989677426969 | 0.5151703567311610 | 0.6820224175995506 | T | T | T |
| 0.3335496851052859 | 0.0600030883318222 | 0.5744345227628619 | T | T | T |



|                    |                    |                    |   |   |   |
|--------------------|--------------------|--------------------|---|---|---|
| 0.0704902737443405 | 0.0947142013711597 | 0.6652233028225478 | T | T | T |
| 0.5916605448907126 | 0.5855534069985304 | 0.5655854578615912 | T | T | T |
| 0.6074665413017786 | 0.8167145229224051 | 0.6537046965496051 | T | T | T |
| 0.0620195884555516 | 0.8361310656520914 | 0.5763485464109634 | T | T | T |
| 0.5257859831312215 | 0.9874597960438566 | 0.6014982088448695 | T | T | T |
| 0.1384866004338123 | 0.6795837330513927 | 0.6270493489088037 | T | T | T |
| 0.0665993652069544 | 0.3289364563819462 | 0.6551517724503312 | T | T | T |
| 0.6027273557587551 | 0.3323000366393319 | 0.5748289531800748 | T | T | T |
| 0.8376950302457742 | 0.0824963912847700 | 0.6649409340481263 | T | T | T |
| 0.8242477641984152 | 0.5905675913763929 | 0.5653719674913936 | T | T | T |
| 0.6029374426184471 | 0.5988810426822684 | 0.6560450342239109 | T | T | T |
| 0.0990535510227105 | 0.0606694270342350 | 0.5762790938952441 | T | T | T |
| 0.6674460658299393 | 0.2914845630876597 | 0.6843077827531072 | T | T | T |
| 0.0280951803951052 | 0.5254377343219644 | 0.6851095340482388 | T | T | T |
| 0.2887128126884083 | 0.1007062124826384 | 0.6706838396986911 | T | T | T |
| 0.5241980179064212 | 0.2466326188172815 | 0.6828377289286670 | T | T | T |
| 0.8513762858344263 | 0.0659613909100875 | 0.6833624613206621 | T | T | T |
| 0.6311829177684375 | 0.3659765353755111 | 0.6889684746676579 | T | T | T |
| 0.9633330378693334 | 0.5612262558071764 | 0.6951633747194162 | T | T | T |
| 0.2656102703602959 | 0.1187771719606798 | 0.6885827299791337 | T | T | T |
| 0.5854019588769482 | 0.2675755471720482 | 0.6844844694410164 | T | T | T |
| 0.5576360643187149 | 0.1718141281187093 | 0.6873380828801124 | T | T | T |
| 0.0599015641599264 | 0.0880986225575398 | 0.6836549911068336 | T | T | T |
| 0.1788627760373968 | 0.6616728655376409 | 0.6994149189926728 | T | T | T |
| 0.3014789769313587 | 0.5959239829615095 | 0.6814685419977931 | T | T | T |
| 0.1098473308199177 | 0.6050025083990839 | 0.6854209864220564 | T | T | T |
| 0.1153357184219456 | 0.7886774140181475 | 0.6832296454963005 | T | T | T |

Best + 4:

In Sn O H Pt

1.0000000000000000

14.6581653332033461 0.0000000000000000 0.0000000000000000

7.3189795989957736 12.7095316657975506 0.0000000000000000

-0.0098891034462902 -0.0168642175486257 51.7150080587397056

In Sn O H Pt

56 8 100 8 3

Selective dynamics

Direct

0.7601334683925316 0.0111196284508281 0.4659634855339050 F F F

0.2397990222127078 0.9863352678444528 0.4737760756088107 F F F

0.7715588052310096 0.2382440998621718 0.4737760756088107 F F F

0.0114253481492099 0.2271244657591041 0.4659634855339050 F F F

0.9885071424342016 0.7703304135794511 0.4737760756088107 F F F

|                    |                    |                    |   |   |   |
|--------------------|--------------------|--------------------|---|---|---|
| 0.9992903736448469 | 0.4987274529686729 | 0.4698697869370179 | F | F | F |
| 0.5006083460974438 | 0.9974548753487298 | 0.4698697869370179 | F | F | F |
| 0.5711026190239110 | 0.3212438999490672 | 0.5325343176450374 | F | F | F |
| 0.0957701894278102 | 0.3438156643639090 | 0.5244126049570497 | F | F | F |
| 0.5954002788407777 | 0.8428761420777775 | 0.5239512181533499 | F | F | F |
| 0.0723457897014868 | 0.8193845017652066 | 0.5323927895013369 | F | F | F |
| 0.1070648802758711 | 0.5700070441001301 | 0.5325343176450374 | F | F | F |
| 0.5592163182809529 | 0.0952136194229070 | 0.5244126049570497 | F | F | F |
| 0.5598611324288072 | 0.5936048851403370 | 0.5239512181533499 | F | F | F |
| 0.1070842580214730 | 0.0712056639447667 | 0.5323927895013369 | F | F | F |
| 0.3217649856391844 | 0.1062039465938440 | 0.5325343176450374 | F | F | F |
| 0.3449459772301964 | 0.5584256068562183 | 0.5244126049570497 | F | F | F |
| 0.8446035586083482 | 0.5584287540679753 | 0.5239512181533499 | F | F | F |
| 0.8205024372159997 | 0.1068647249330610 | 0.5323927895013369 | F | F | F |
| 0.3340676120032526 | 0.8312648480018296 | 0.5281957169818696 | F | F | F |
| 0.8324680001261981 | 0.3325994467597084 | 0.5281957169818696 | F | F | F |
| 0.3333108283129889 | 0.3324849635476852 | 0.5286123655445181 | F | F | F |
| 0.8333293577484682 | 0.8310454865245305 | 0.5281957169818696 | F | F | F |
| 0.2283736683972180 | 0.7592107964331092 | 0.4659634855339050 | F | F | F |
| 0.4999662501356283 | 0.4987274529686729 | 0.4698697869370179 | F | F | F |
| 0.7722008935562172 | 0.7369715375365402 | 0.4737760782952236 | F | F | F |
| 0.4891830112588380 | 0.7703304059322917 | 0.4737760782952236 | F | F | F |
| 0.7384810650628779 | 0.4876078378172437 | 0.4737760782952236 | F | F | F |
| 0.7553632792156803 | 0.0068732568909566 | 0.6407911817778205 | T | T | T |
| 0.9088546500717888 | 0.6506667641842527 | 0.5895198653953757 | T | T | T |
| 0.4253976158549458 | 0.6797586545863012 | 0.5821092667228059 | T | T | T |
| 0.9267602489573326 | 0.1768795836713761 | 0.5822179507812062 | T | T | T |
| 0.4032710247933825 | 0.1557655104284877 | 0.5908147565186138 | T | T | T |
| 0.2329103835975967 | 0.7525657914355128 | 0.6408213599842150 | T | T | T |
| 0.4408049977114962 | 0.9043756210632200 | 0.5895922719516097 | T | T | T |
| 0.8965789044419585 | 0.4263331293866576 | 0.5815316117458490 | T | T | T |
| 0.7602100556643220 | 0.2522720230363180 | 0.6489793833367971 | T | T | T |
| 0.8943028292306082 | 0.9270958925630542 | 0.5826053790071953 | T | T | T |
| 0.4374806350805945 | 0.4050404607062380 | 0.5913705228106375 | T | T | T |
| 0.2255942208017470 | 0.2500201889390377 | 0.6406266916011818 | T | T | T |
| 0.0035549505675374 | 0.2408891848616691 | 0.6393075687298576 | T | T | T |
| 0.6523105613449163 | 0.4401854714977396 | 0.5888177943796389 | T | T | T |
| 0.6784533672594649 | 0.8941544379800260 | 0.5817631740001229 | T | T | T |
| 0.1769383957269730 | 0.8929842773650664 | 0.5825726866947744 | T | T | T |
| 0.1568235736426813 | 0.4362203884931783 | 0.5912379918815718 | T | T | T |
| 0.5116479996888882 | 0.2278413824783823 | 0.6408419319580513 | T | T | T |
| 0.6687526821826659 | 0.6657462094585004 | 0.5836976772701822 | T | T | T |
| 0.0041747222899478 | 0.4939860384527771 | 0.6465220829241405 | T | T | T |
| 0.6663927247476221 | 0.1660603406418814 | 0.5867288432744958 | T | T | T |

|                    |                    |                    |   |   |   |
|--------------------|--------------------|--------------------|---|---|---|
| 0.4955492709895599 | 0.5216020040580421 | 0.6428643270603988 | T | T | T |
| 0.1648747553158746 | 0.1664364568014691 | 0.5852014871512917 | T | T | T |
| 0.5033033980772066 | 0.9957985161080126 | 0.6439745737359256 | T | T | T |
| 0.1671853803452791 | 0.6652751707657532 | 0.5858689240632353 | T | T | T |
| 0.2381071146134227 | 0.0038911314074841 | 0.6486965973195736 | T | T | T |
| 0.2531691490703661 | 0.5120834155345467 | 0.6419847234810787 | T | T | T |
| 0.9885843380251584 | 0.7613780408955110 | 0.6499716779315362 | T | T | T |
| 0.2277315647397131 | 0.2604833434644362 | 0.4659634882203321 | F | F | F |
| 0.5107495099301005 | 0.2271244581119447 | 0.4659634882203321 | F | F | F |
| 0.2614514102691530 | 0.5098470890666533 | 0.4659634882203321 | F | F | F |
| 0.0000000000000000 | 0.0000000000000000 | 0.4698697815641637 | F | F | F |
| 0.7467225002627319 | 0.4910350685755295 | 0.6445860827688792 | T | T | T |
| 0.7727192243983222 | 0.7354624618579650 | 0.6451969067380159 | T | T | T |
| 0.5047918051907926 | 0.7552871911212062 | 0.6453009163388065 | T | T | T |
| 0.9965672890184423 | 0.0050055533353720 | 0.6457208698428993 | T | T | T |
| 0.8159599359379399 | 0.8579122813819282 | 0.4853073788173816 | F | F | F |
| 0.3952951534094780 | 0.9363767461815229 | 0.4577430201053687 | F | F | F |
| 0.9176869787037418 | 0.1541639962793013 | 0.4492957297685578 | F | F | F |
| 0.1695994874784077 | 0.4323415158892061 | 0.4596076389699917 | F | F | F |
| 0.3245503040634432 | 0.8138816341340984 | 0.4853073788173816 | F | F | F |
| 0.6662166882857647 | 0.3936186536121724 | 0.4577430201053687 | F | F | F |
| 0.9266394692931357 | 0.9163920824521128 | 0.4492957297685578 | F | F | F |
| 0.3969640192055408 | 0.1688408520964444 | 0.4596076389699917 | F | F | F |
| 0.8593547298765358 | 0.3231158657700490 | 0.4853073788173816 | F | F | F |
| 0.9383531281826833 | 0.6649143814923804 | 0.4577430201053687 | F | F | F |
| 0.1555385218810557 | 0.9243537025546544 | 0.4492957297685578 | F | F | F |
| 0.4333689782550181 | 0.3962725226573838 | 0.4596076389699917 | F | F | F |
| 0.1839725646666253 | 0.1395426248879019 | 0.4544321788212997 | F | F | F |
| 0.6046373471950943 | 0.0610781600883072 | 0.4819965375333126 | F | F | F |
| 0.0822455252339367 | 0.8432909133153856 | 0.4904438267021192 | F | F | F |
| 0.8303330131261575 | 0.5651133903806240 | 0.4801319186686825 | F | F | F |
| 0.6753821496046513 | 0.1835732721357388 | 0.4544321788212997 | F | F | F |
| 0.3337157653823439 | 0.6038362526576577 | 0.4819965375333126 | F | F | F |
| 0.0732929777215929 | 0.0810628271425600 | 0.4904438267021192 | F | F | F |
| 0.6029684344625679 | 0.8286140541733857 | 0.4801319186686825 | F | F | F |
| 0.1405777706676758 | 0.6743389936194006 | 0.4544321788212997 | F | F | F |
| 0.0615793723615283 | 0.3325404778970764 | 0.4819965375333126 | F | F | F |
| 0.8443939819834299 | 0.0731011501850887 | 0.4904438267021192 | F | F | F |
| 0.5665635222892007 | 0.6011823367320730 | 0.4801319186686825 | F | F | F |
| 0.5157033466994037 | 0.4720642166451867 | 0.5128125034488065 | F | F | F |
| 0.9382155266378476 | 0.3935697119943384 | 0.5402222571510507 | F | F | F |
| 0.4134764846239136 | 0.1788316355844657 | 0.5490782248169097 | F | F | F |
| 0.1652727673189958 | 0.8968637606432637 | 0.5386393295024519 | F | F | F |
| 0.0115860744760994 | 0.5144800304850392 | 0.5128125034488065 | F | F | F |

|                    |                    |                    |   |   |   |
|--------------------|--------------------|--------------------|---|---|---|
| 0.6667529985908658 | 0.9365882393736200 | 0.5402222571510507 | F | F | F |
| 0.4068878560599956 | 0.4127524079384770 | 0.5490782248169097 | F | F | F |
| 0.9354527360783820 | 0.1639219592684142 | 0.5386393295024519 | F | F | F |
| 0.4726430637634564 | 0.0109106435128155 | 0.5128125034488065 | F | F | F |
| 0.3948964446492127 | 0.6647518299181101 | 0.5402222571510507 | F | F | F |
| 0.1795681442550503 | 0.4058708471200845 | 0.5490782248169097 | F | F | F |
| 0.8991394664805483 | 0.9341240613744048 | 0.5386393295024519 | F | F | F |
| 0.1502529583315635 | 0.1927478839608767 | 0.5438600605743957 | F | F | F |
| 0.7266414664239278 | 0.2718121688495998 | 0.5161713476883989 | F | F | F |
| 0.2526104716998674 | 0.4861492806533860 | 0.5077022588577265 | F | F | F |
| 0.5025193335949325 | 0.7654379243932397 | 0.5178780203333417 | F | F | F |
| 0.6558578905342074 | 0.1498255430760409 | 0.5438600605743957 | F | F | F |
| 0.0011533585709813 | 0.7254235855908746 | 0.5161713476883989 | F | F | F |
| 0.2602568251204715 | 0.2516834436997044 | 0.5077022588577265 | F | F | F |
| 0.7300539366250547 | 0.5009345144027506 | 0.5178780203333417 | F | F | F |
| 0.1938216360732028 | 0.6548814636061238 | 0.5438600605743957 | F | F | F |
| 0.2721376599440504 | 0.0002191362025528 | 0.5161713476883989 | F | F | F |
| 0.4870651881186276 | 0.2596221662899509 | 0.5077022588577265 | F | F | F |
| 0.7672916996579389 | 0.7285373424900783 | 0.5178780203333417 | F | F | F |
| 0.8136126279559719 | 0.8466554796156003 | 0.6560776572075296 | T | T | T |
| 0.8503827184916238 | 0.8048057892774282 | 0.5711930225647635 | T | T | T |
| 0.2683448761913607 | 0.7317001763901705 | 0.5979122948951996 | T | T | T |
| 0.4007520020061637 | 0.9211784443681148 | 0.6344582877226240 | T | T | T |
| 0.7492796780798315 | 0.5127257240357591 | 0.6055403340866025 | T | T | T |
| 0.9218199836396703 | 0.1495672034560827 | 0.6261084023454527 | T | T | T |
| 0.4966680617844587 | 0.2328241632872680 | 0.5975376423666887 | T | T | T |
| 0.1764450033078347 | 0.4230919305820507 | 0.6348468540859699 | T | T | T |
| 0.3981654130787975 | 0.7008774109052527 | 0.6451354009159436 | T | T | T |
| 0.3436144057926995 | 0.8497373051521454 | 0.5712289789270243 | T | T | T |
| 0.9957655960079331 | 0.2707350207973752 | 0.5970705882002890 | T | T | T |
| 0.6609905713781562 | 0.4102684983160572 | 0.6315404530354639 | T | T | T |
| 0.7397270517803982 | 0.7463471553660378 | 0.6061598585491530 | T | T | T |
| 0.9306787648311042 | 0.9228471721089567 | 0.6272061732641742 | T | T | T |
| 0.2683773722530606 | 0.4970070742752378 | 0.5977765166145195 | T | T | T |
| 0.3947552629343405 | 0.1697400588303181 | 0.6351414982475722 | T | T | T |
| 0.8472643983200694 | 0.3403898033435623 | 0.6559688415479938 | T | T | T |
| 0.8048769257429539 | 0.3431128121182343 | 0.5709377358537283 | T | T | T |
| 0.7309697901095453 | 0.9974719794218323 | 0.5984757296531020 | T | T | T |
| 0.9343354260648001 | 0.6626067180053928 | 0.6313226582455349 | T | T | T |
| 0.5205947283777258 | 0.7371223967335943 | 0.6058464257283166 | T | T | T |
| 0.1521452859358544 | 0.9252613177909006 | 0.6288032241303916 | T | T | T |
| 0.2328822826618080 | 0.2660287319013999 | 0.5965849925247980 | T | T | T |
| 0.4335762902101279 | 0.4047478706986928 | 0.6356070019060654 | T | T | T |
| 0.4801793728194551 | 0.5286318853203232 | 0.6005170785757394 | T | T | T |

|                    |                    |                    |   |   |   |
|--------------------|--------------------|--------------------|---|---|---|
| 0.1725905061748025 | 0.1392281162455342 | 0.6257451564360793 | T | T | T |
| 0.5990339223724530 | 0.0608787892758321 | 0.6548476487574921 | T | T | T |
| 0.0637806304055009 | 0.6015538120964935 | 0.5743039949205525 | T | T | T |
| 0.0358073086777486 | 0.9430759049672641 | 0.6816319161888754 | T | T | T |
| 0.5863640098269337 | 0.8213837423075955 | 0.5653738786945212 | T | T | T |
| 0.8230138235022053 | 0.5749470130414627 | 0.6528176366524434 | T | T | T |
| 0.8358548688493623 | 0.0992654149246509 | 0.5765369136766662 | T | T | T |
| 0.9918621366993478 | 0.4802114589978708 | 0.6022774744495001 | T | T | T |
| 0.6792532245976329 | 0.1818422536920391 | 0.6290075821008418 | T | T | T |
| 0.4654973383966741 | 0.5180910260018378 | 0.6840261603605617 | T | T | T |
| 0.3336313451965711 | 0.0602698626186188 | 0.5744347424355690 | T | T | T |
| 0.0700561611278457 | 0.0951004903078006 | 0.6652019278887003 | T | T | T |
| 0.5915958637833787 | 0.5862311666688870 | 0.5654929766728813 | T | T | T |
| 0.6082250358233459 | 0.8166781280633539 | 0.6535391873492676 | T | T | T |
| 0.0620771744991368 | 0.8367707397868412 | 0.5763582165239953 | T | T | T |
| 0.5255903507037462 | 0.9887133338012102 | 0.6015282823041057 | T | T | T |
| 0.1377129230671474 | 0.6810981125492493 | 0.6268926116208140 | T | T | T |
| 0.0668759658913858 | 0.3295058029502523 | 0.6551430458113827 | T | T | T |
| 0.6028918415368177 | 0.3322628754370865 | 0.5747330033355617 | T | T | T |
| 0.8376733938590847 | 0.0823007905458903 | 0.6648476112966621 | T | T | T |
| 0.8237763868649021 | 0.5907019748050788 | 0.5654075144703746 | T | T | T |
| 0.6013793991694316 | 0.5977627649301737 | 0.6569041780105024 | T | T | T |
| 0.0990258002197682 | 0.0608772917412172 | 0.5762844910990067 | T | T | T |
| 0.6718674974580399 | 0.2884968164454327 | 0.6843358683793285 | T | T | T |
| 0.0262324822534396 | 0.5395025701635197 | 0.6841989406491017 | T | T | T |
| 0.2904747638066176 | 0.1000498903672789 | 0.6704517619935682 | T | T | T |
| 0.5241231032009801 | 0.2500703223744946 | 0.6832414256658346 | T | T | T |
| 0.8507147986709868 | 0.0665955574650857 | 0.6833153781723498 | T | T | T |
| 0.6407794009542397 | 0.3616655218560300 | 0.6897830753165698 | T | T | T |
| 0.2693248212409474 | 0.1173464476599322 | 0.6884926455635326 | T | T | T |
| 0.5873929979383958 | 0.2682123269559260 | 0.6846990050904845 | T | T | T |
| 0.5551189113091294 | 0.1759896631178197 | 0.6882398126842248 | T | T | T |
| 0.0597239400382796 | 0.0893088906385681 | 0.6836898873882842 | T | T | T |
| 0.4828857603553557 | 0.5693923038533055 | 0.6911638560418061 | T | T | T |
| 0.1738405497171756 | 0.6629679705817541 | 0.7003632745739414 | T | T | T |
| 0.2984555442084248 | 0.5982811177850647 | 0.6821396407732673 | T | T | T |
| 0.1103110844298189 | 0.6042723389260191 | 0.6846137874452246 | T | T | T |
| 0.1142483608577934 | 0.7889435608296315 | 0.6833509131282777 | T | T | T |
